# Supplementary material for: Perinatal Lead Exposure Promotes Sex-Specific Epigenetic Programming of Disease-Relevant Pathways in Mouse Heart
Source: Toxics. 2023 Jan 16;11(1):85. doi: 10.3390/toxics11010085 (PMC9860846; doi:10.3390/toxics11010085)
Supplement: Supplementary file 1 [file toxics-11-00085-s001.zip › toxics-2078294-supplementary.xlsx]

## Sheet: S1
Table S1: RNA-seq analysis in Pb-treated males
logFC	logCPM	F	PValue	FDR	symbol
0.76949	3.38513	19.4134	2.75597e-05	0.262849	Klhl34
-0.230392	4.56225	18.2636	4.55742e-05	0.262849	Mrpl49
0.25139	3.57394	17.1378	7.50472e-05	0.288557	B3gnt2
-0.24665	2.3203	6.37265	0.0132408	0.355183	1110012L19Rik
0.371463	6.0156	6.47598	0.0125395	0.355183	1700020I14Rik
-0.26102	4.35382	6.56474	0.0119681	0.355183	1810037I17Rik
-0.219881	4.90352	7.68002	0.00671371	0.355183	2310036O22Rik
-0.332465	2.34328	8.75464	0.0038947	0.355183	2310040G24Rik
-0.212363	3.08608	7.12893	0.00891754	0.355183	6330408A02Rik
0.264858	2.58063	6.48639	0.012471	0.355183	8430419L09Rik
0.315148	1.7385	9.67491	0.00246401	0.355183	9130023H24Rik
0.219405	2.05812	6.37864	0.0131991	0.355183	A130010J15Rik
0.224509	7.2082	7.77627	0.00639111	0.355183	AI314180
-0.266937	2.73888	11.4361	0.00104579	0.355183	Aaas
0.41164	4.49796	6.53267	0.0121713	0.355183	Abat
0.365979	2.71164	6.99459	0.0095614	0.355183	Abca5
0.290987	4.6821	7.40492	0.00773255	0.355183	Abcc1
0.400878	0.916571	6.61995	0.0116264	0.355183	Abhd15
0.463354	3.7011	9.8412	0.00227012	0.355183	Abhd2
0.297246	4.57978	6.7643	0.0107804	0.355183	Abl2
0.330135	4.63551	6.73488	0.0109475	0.355183	Abtb2
0.335357	5.13528	7.35484	0.00793471	0.355183	Adcy9
0.16882	4.25647	6.39279	0.013101	0.355183	Adgra2
-0.221181	8.9438	7.17939	0.00868752	0.355183	Aes
0.372522	5.97737	8.66597	0.00407197	0.355183	Aff4
0.199318	4.21258	7.20609	0.00856831	0.355183	Ago1
0.556582	5.21132	6.92298	0.00992425	0.355183	Ago2
-0.189033	3.80888	6.71059	0.0110874	0.355183	Akr1e1
0.140521	6.53619	6.26985	0.0139795	0.355183	Akt2
-0.258824	2.40968	6.29077	0.0138257	0.355183	Alg12
0.187654	2.65563	8.51217	0.00439955	0.355183	Alg2
0.467279	7.3352	11.2343	0.00115237	0.355183	Alpk2
0.256402	5.59293	7.07361	0.009177	0.355183	Anapc1
0.303225	6.03823	6.89727	0.010058	0.355183	Ank3
0.304095	4.61691	8.30024	0.00489637	0.355183	Ankrd28
0.290307	2.96571	6.33697	0.0134925	0.355183	Ano1
-0.338685	1.72382	12.8117	0.000543878	0.355183	Ap1g2
0.32416	2.92253	7.15109	0.00881574	0.355183	Apc2
0.331659	5.85164	8.90786	0.00360699	0.355183	Arfgef2
0.290735	7.6791	7.68419	0.00669939	0.355183	Arhgef12
-0.328623	1.77038	10.5693	0.00158978	0.355183	Arl16
-0.220495	4.41647	6.87207	0.0101909	0.355183	Arl3
0.285661	4.77791	8.44453	0.00455217	0.355183	Asxl1
0.210583	4.93011	6.36219	0.0133141	0.355183	Ate1
0.251802	4.61494	9.1171	0.00324921	0.355183	Atg2b
0.311176	6.73599	7.03933	0.00934177	0.355183	Atp11a
0.302413	13.2875	7.81513	0.00626547	0.355183	Atp2a2
0.404345	2.50495	6.30183	0.0137452	0.355183	Atp8a2
0.251462	5.25748	7.20822	0.0085589	0.355183	Atrn
0.235128	4.56131	6.98944	0.00958704	0.355183	Atrnl1
0.200203	4.43112	6.73865	0.0109259	0.355183	Atxn1l
0.170525	6.05912	8.17872	0.00520719	0.355183	B4galt1
0.273891	3.54739	10.7103	0.00148451	0.355183	B4galt5
-0.475342	2.50319	9.92917	0.002174	0.355183	Banp
-0.166088	3.5845	6.60331	0.0117283	0.355183	Bbip1
0.263455	3.91264	7.36297	0.00790155	0.355183	Bbx
-0.183794	4.26929	6.44867	0.012721	0.355183	Bcs1l
0.558082	1.56099	9.70758	0.00242461	0.355183	Bend4
0.482068	0.73865	6.43279	0.0128278	0.355183	Bmp2
0.261265	2.594	6.43114	0.0128389	0.355183	Bmp2k
0.436739	3.9794	6.97865	0.00964094	0.355183	Btbd7
0.32072	7.84589	6.39915	0.0130571	0.355183	Cacna1c
0.529956	1.09822	8.75969	0.00388485	0.355183	Cacna1d
0.326129	6.7101	6.52287	0.0122341	0.355183	Cand2
0.18103	7.60285	8.86561	0.00368405	0.355183	Canx
-0.16144	4.4806	7.5492	0.00717955	0.355183	Capn1
-0.278474	1.72986	6.40428	0.0130219	0.355183	Caprin2
0.49945	3.21332	7.27221	0.00828043	0.355183	Cbl
-0.163694	3.96017	6.62847	0.0115746	0.355183	Cbr1
-0.273377	3.31194	8.46865	0.00449714	0.355183	Cby1
-0.261023	1.76837	7.19378	0.00862308	0.355183	Ccdc77
-0.189424	3.95914	8.94484	0.0035409	0.355183	Ccndbp1
-0.151961	6.58339	6.61075	0.0116826	0.355183	Cdc37
0.368861	1.7391	8.43091	0.00458355	0.355183	Cdh19
0.278907	7.0236	6.57895	0.0118791	0.355183	Cds2
-0.239707	2.90722	11.5056	0.00101152	0.355183	Cep19
-0.227298	3.35502	11.3184	0.00110662	0.355183	Cfap20
-0.234764	2.24921	7.11644	0.00897545	0.355183	Chchd5
-0.340481	1.47008	7.99945	0.00570358	0.355183	Chek2
0.506357	0.444202	7.54769	0.00718513	0.355183	Chl1
-0.260634	3.99057	6.36608	0.0132868	0.355183	Cidea
-0.209694	10.3779	11.0522	0.00125809	0.355183	Ckmt2
-0.391191	1.00507	8.40473	0.00464454	0.355183	Cks1b
0.240002	5.67769	7.30922	0.00812366	0.355183	Clasp2
-0.392022	3.34494	8.62986	0.00414654	0.355183	Clec2d
0.388261	8.02165	12.6182	0.000595816	0.355183	Clic5
0.313513	7.45884	7.02617	0.0094058	0.355183	Clip1
-0.206809	4.22281	7.44192	0.00758666	0.355183	Clk3
-0.223897	1.86631	6.56821	0.0119463	0.355183	Cln3
0.276456	7.06142	9.35188	0.00289116	0.355183	Cltc
-0.306436	3.91572	6.68399	0.0112428	0.355183	Cmbl
0.374969	9.62832	6.29947	0.0137624	0.355183	Cmya5
-0.284198	1.50199	8.49018	0.00444857	0.355183	Cntrob
0.220022	5.11432	7.35725	0.00792487	0.355183	Col4a3bp
0.29345	5.47345	8.12128	0.00536115	0.355183	Col4a5
0.130033	4.85441	6.81833	0.0104805	0.355183	Copb1
0.247503	6.18906	9.34843	0.00289611	0.355183	Cpd
0.205774	4.24376	10.6759	0.00150953	0.355183	Cpsf2
0.258147	5.46515	6.84863	0.0103162	0.355183	Crim1
0.148164	4.0555	6.30319	0.0137353	0.355183	Csgalnact2
0.269775	4.81941	10.848	0.00138864	0.355183	Cyld
0.212165	3.78593	8.989	0.00346362	0.355183	D230025D16Rik
0.243349	6.69026	6.47166	0.012568	0.355183	D5Ertd579e
0.508026	3.12058	8.55405	0.00430773	0.355183	Dach1
0.217718	3.59437	8.77681	0.00385163	0.355183	Dcaf10
0.229484	5.63743	6.60996	0.0116874	0.355183	Dcaf7
-0.23267	5.41892	7.7033	0.00663417	0.355183	Dcakd
0.322411	3.82653	6.96267	0.00972142	0.355183	Dcp2
-0.189629	3.81692	10.2448	0.00186233	0.355183	Dctn5
0.219868	7.14824	7.14673	0.00883568	0.355183	Ddb1
0.456176	2.91813	7.30713	0.00813247	0.355183	Ddi2
0.163208	2.78799	7.44619	0.00756997	0.355183	Ddx18
0.303522	4.28297	7.57385	0.00708926	0.355183	Dennd1b
0.207834	4.95258	7.73418	0.00653015	0.355183	Dhx30
0.174619	3.96415	7.07685	0.00916158	0.355183	Dhx8
0.494124	4.7406	7.78593	0.00635966	0.355183	Dmxl2
0.331502	2.25417	6.44166	0.012768	0.355183	Dnajb14
0.173951	5.85296	7.39046	0.00779038	0.355183	Dnajc5
-0.200758	2.85436	7.60656	0.0069713	0.355183	Dnajc9
0.290059	5.60022	7.92936	0.00591081	0.355183	Dnmt3a
0.440492	3.9257	7.91407	0.00595705	0.355183	Dock5
0.235648	3.92178	6.59883	0.0117559	0.355183	Dopey1
0.312019	2.682	6.40669	0.0130054	0.355183	Dpyd
0.358961	6.1382	6.57607	0.0118971	0.355183	Dusp18
-0.283765	3.24627	7.76858	0.0064163	0.355183	Dusp23
0.242689	8.04872	6.96945	0.00968717	0.355183	Dync1h1
0.4382	1.52695	11.9198	0.00082978	0.355183	Dync2h1
0.407305	1.59933	7.68095	0.00671052	0.355183	E130308A19Rik
-0.369115	2.08954	13.7631	0.000348547	0.355183	E330011O21Rik
0.261117	8.31575	8.45547	0.00452713	0.355183	Ehd4
0.329898	0.835199	6.27401	0.0139487	0.355183	Eif5a2
0.284038	2.09492	9.7668	0.00235484	0.355183	Eme2
0.247364	4.80881	7.07672	0.00916223	0.355183	Enpp4
0.209098	3.39161	7.37193	0.00786514	0.355183	Epb4.1l1
0.421744	2.41355	10.2526	0.00185528	0.355183	Epb4.1l5
0.345695	3.56625	7.02854	0.00939424	0.355183	Epg5
0.226107	4.73173	7.27778	0.00825664	0.355183	Erap1
0.227108	3.08407	6.70277	0.0111329	0.355183	Erbb2
0.259184	4.90708	7.22092	0.00850285	0.355183	Esrrb
0.196556	5.10799	8.34721	0.00478145	0.355183	Esyt2
0.335623	3.69081	7.31942	0.00808102	0.355183	Etv5
-0.248442	9.77803	6.57933	0.0118767	0.355183	Fabp3
0.348874	2.12656	8.26696	0.00497951	0.355183	Fam110b
0.303199	3.65314	10.596	0.00156929	0.355183	Fam129a
0.279857	5.8304	7.29604	0.00817915	0.355183	Fam160a1
0.381123	5.92647	9.07066	0.0033253	0.355183	Fam168a
0.165208	5.50143	7.00161	0.0095266	0.355183	Fam168b
-0.223951	2.04644	7.56018	0.00713921	0.355183	Fam216a
0.20283	5.29517	8.21778	0.0051051	0.355183	Fbxl3
0.181405	3.81415	6.39251	0.0131029	0.355183	Fbxo45
0.266789	5.20538	7.92718	0.00591738	0.355183	Fbxw11
-0.154945	6.65811	6.92478	0.00991497	0.355183	Flot1
-0.191197	1.96988	7.08054	0.00914409	0.355183	Fn3krp
0.298315	3.6346	7.44592	0.00757103	0.355183	Fnip2
0.318281	3.82029	7.27069	0.00828691	0.355183	Focad
0.250553	4.46679	7.70379	0.00663251	0.355183	Foxk1
0.465563	6.32196	9.78081	0.00233865	0.355183	Fry
0.787836	1.89024	14.3033	0.000271401	0.355183	Fstl4
0.32881	3.26761	11.3894	0.00106953	0.355183	Fzd7
0.353443	4.42863	7.0969	0.00906683	0.355183	Gatsl2
-0.530073	3.3937	6.48495	0.0124805	0.355183	Gbp9
0.328379	5.57425	6.69027	0.0112059	0.355183	Gcn1l1
0.26303	6.34723	6.69854	0.0111576	0.355183	Glg1
0.218988	5.49839	8.54502	0.00432737	0.355183	Gls
0.429869	2.46939	7.83296	0.0062087	0.355183	Glt28d2
0.444549	1.98519	7.47727	0.0074499	0.355183	Gm17296
0.395885	2.64787	6.62324	0.0116064	0.355183	Gm5113
-0.325054	1.15365	7.34335	0.00798187	0.355183	Gm5860
0.244942	4.84276	7.65252	0.00680895	0.355183	Gna13
0.177623	3.99979	8.05599	0.00554192	0.355183	Gnai3
0.199621	6.59764	6.8731	0.0101854	0.355183	Gns
0.343398	7.24371	7.29323	0.00819103	0.355183	Gpcpd1
0.464016	2.96218	6.88763	0.0101087	0.355183	Gramd1b
0.271561	2.79028	6.43564	0.0128085	0.355183	Gtf3c3
-0.271874	3.97949	7.63649	0.00686514	0.355183	Hdac11
0.251966	4.6739	6.54853	0.0120703	0.355183	Heca
0.241121	2.56782	8.53707	0.00434473	0.355183	Hmgcr
0.325058	5.05386	6.97313	0.00966867	0.355183	Hr
-0.233478	3.26511	6.59004	0.0118102	0.355183	Ift43
-0.195103	4.43136	6.35596	0.0133579	0.355183	Igbp1
0.264393	4.99729	6.95673	0.00975149	0.355183	Igf1r
0.2889	7.36668	6.53276	0.0121708	0.355183	Igf2r
0.270222	4.15546	7.74626	0.00648994	0.355183	Igsf3
0.249124	4.26965	6.30062	0.013754	0.355183	Ikbkap
0.396008	1.77286	8.47443	0.00448405	0.355183	Il6ra
0.219363	7.25177	7.97296	0.00578099	0.355183	Il6st
0.235788	1.82138	6.33713	0.0134913	0.355183	Inpp5f
0.337195	6.8995	6.50268	0.0123646	0.355183	Insr
0.219427	7.0921	10.3579	0.00176225	0.355183	Ipo5
0.28355	2.67465	6.3392	0.0134766	0.355183	Ipp
0.609279	2.82418	7.26561	0.00830871	0.355183	Irs2
0.201565	4.43913	10.393	0.00173234	0.355183	Jak2
-0.182372	4.1985	10.5856	0.00157726	0.355183	Jmjd8
0.260939	8.92236	6.94392	0.00981668	0.355183	Jph2
0.247439	4.85196	6.82289	0.0104556	0.355183	Kdm4b
0.32914	6.88491	10.706	0.0014876	0.355183	Kif13a
-0.173787	4.45728	9.39128	0.0028352	0.355183	Klc4
0.480514	3.16114	6.4239	0.012888	0.355183	Klhdc7a
0.295296	6.31182	6.44821	0.0127241	0.355183	Kpna1
0.343456	7.03575	7.4306	0.007631	0.355183	Kremen1
0.276649	6.71296	6.35149	0.0133895	0.355183	Lama2
0.20113	6.54153	6.93771	0.00984843	0.355183	Lamb1
-0.273069	4.17916	8.80863	0.0037907	0.355183	Lamtor2
0.253639	5.69107	7.42253	0.00766274	0.355183	Large
0.424234	2.69409	7.01126	0.00947892	0.355183	Ldlr
0.291266	3.64516	7.86485	0.00610846	0.355183	Lemd3
-0.859363	3.53482	10.0139	0.00208543	0.355183	Lgals4
-0.31652	1.23165	7.36188	0.00790596	0.355183	Llph
0.749662	5.89087	8.79434	0.00381794	0.355183	Lnpep
0.404053	7.62254	11.2955	0.0011189	0.355183	Lpin1
0.261216	5.16962	7.29176	0.00819724	0.355183	Lrig1
0.225254	3.11073	6.58897	0.0118168	0.355183	Lrig2
0.311726	7.15116	7.55425	0.00716099	0.355183	Lrp1
0.38377	1.7051	6.96589	0.00970511	0.355183	Lrrc8b
-0.208366	2.64236	6.28206	0.0138896	0.355183	Lsm8
0.291727	4.50737	8.87423	0.00366819	0.355183	Ltn1
0.224445	4.10756	6.27211	0.0139628	0.355183	Lzic
-0.507397	9.11811	6.95087	0.00978123	0.355183	Malat1
0.356205	1.92219	7.63298	0.00687749	0.355183	Maml3
0.351061	3.43731	7.36415	0.00789674	0.355183	Map1a
0.220273	5.08599	7.41356	0.00769821	0.355183	Map3k5
0.144622	6.38906	6.32059	0.0136096	0.355183	Mapk1
0.263462	5.95278	12.4817	0.00063552	0.355183	Mapt
0.150024	5.96615	6.51024	0.0123156	0.355183	Mcur1
0.2936	4.88967	6.79807	0.010592	0.355183	Med13l
0.420279	3.36087	6.83955	0.0103652	0.355183	Megf9
0.290853	5.89468	7.55471	0.00715928	0.355183	Mfhas1
0.18343	7.64168	9.73024	0.00239767	0.355183	Mfn1
0.247307	9.35587	8.42245	0.00460316	0.355183	Mfn2
0.34655	3.67789	7.09707	0.00906602	0.355183	Mib1
0.175405	5.12338	8.87416	0.00366832	0.355183	Mkln1
-0.158411	6.92249	6.35951	0.0133329	0.355183	Mlf2
0.363402	3.91488	8.094	0.00543591	0.355183	Mn1
0.245533	2.28601	6.95148	0.00977816	0.355183	Mre11a
-0.18405	5.42408	9.85528	0.00225445	0.355183	Mrpl38
-0.207378	5.24533	6.51777	0.012267	0.355183	Mrpl55
-0.251509	4.3278	7.38776	0.00780123	0.355183	Mrps25
-0.189143	5.50195	12.365	0.000671586	0.355183	Mrps9
0.336058	2.14314	7.74267	0.00650186	0.355183	Mtcl1
-0.223968	2.68044	8.05792	0.0055365	0.355183	Mterf4
-0.521766	0.86098	6.59611	0.0117727	0.355183	Mtl5
0.222211	8.48573	7.57508	0.00708481	0.355183	Myo18b
0.450079	9.41656	10.7323	0.0014688	0.355183	Myom2
-0.183898	3.79754	6.59032	0.0118085	0.355183	N6amt1
-0.295263	4.20559	9.85133	0.00225883	0.355183	Nat6
0.277276	4.54106	6.9394	0.00983978	0.355183	Nbas
0.362358	5.64614	7.77722	0.00638802	0.355183	Ndst1
-0.243342	6.25955	8.75404	0.00389587	0.355183	Ndufb3
0.25282	7.13126	6.84309	0.0103461	0.355183	Nek9
0.157128	4.30714	7.49061	0.00739899	0.355183	Ngly1
0.413206	4.1327	6.60441	0.0117215	0.355183	Nhlrc2
-0.371456	1.34236	7.7222	0.00657031	0.355183	Nme4
0.300605	4.15966	7.13472	0.00889081	0.355183	Notch2
-0.214372	3.62687	12.0916	0.000764638	0.355183	Nprl2
0.210041	3.31205	9.94281	0.00215949	0.355183	Nrde2
0.20784	3.84901	10.7617	0.00144793	0.355183	Nsf
-0.166348	3.63961	7.26616	0.00830635	0.355183	Nt5c3b
0.325303	6.00154	7.3748	0.0078535	0.355183	Nt5dc3
0.331743	4.77933	9.05308	0.00335459	0.355183	Nup153
-0.227352	0.891906	6.33289	0.0135216	0.355183	Nup43
-0.315376	2.74794	7.83424	0.00620465	0.355183	Nutf2
0.198206	3.31601	6.27945	0.0139087	0.355183	Nvl
0.200482	3.13388	6.90496	0.0100178	0.355183	Nynrin
-0.270812	3.27059	12.6897	0.000576067	0.355183	Oard1
0.239834	6.52194	8.00118	0.00569856	0.355183	Osbp
-0.338127	0.594873	7.10259	0.0090401	0.355183	Osbpl10
0.23699	3.6601	7.62055	0.00692144	0.355183	P2rx5
0.232615	5.27762	14.1215	0.000295186	0.355183	Pacs2
0.207818	7.30426	6.69742	0.0111641	0.355183	Pafah1b1
-0.208866	4.02142	8.43232	0.00458031	0.355183	Pagr1a
0.295313	4.90402	6.83499	0.0103899	0.355183	Pank3
-0.168129	4.36937	8.13944	0.00531195	0.355183	Parp3
0.446509	1.12389	8.5956	0.00421859	0.355183	Pcdhga7
0.291721	1.31143	6.2699	0.0139791	0.355183	Pcdhgb2
-0.274807	3.51258	8.49777	0.00443159	0.355183	Pdgfa
0.314977	5.3303	6.4753	0.012544	0.355183	Pdpk1
-0.219011	3.23246	8.6128	0.00418225	0.355183	Pdzd11
0.331236	6.31911	7.57626	0.0070805	0.355183	Pdzd2
0.379884	6.50225	6.55899	0.0120042	0.355183	Pfkfb2
0.225183	7.20966	8.32461	0.00483639	0.355183	Pgm5
-0.23267	2.97864	7.8326	0.00620982	0.355183	Phkg2
0.564636	0.586873	7.04734	0.00930298	0.355183	Pik3ap1
0.178816	4.15272	7.18104	0.00868009	0.355183	Pik3r4
0.161634	4.02178	6.73397	0.0109527	0.355183	Pip5k1a
0.429199	2.44599	9.02392	0.00340377	0.355183	Pkdrej
0.238897	6.85776	6.99528	0.00955796	0.355183	Plxnb2
-0.350696	2.38395	8.49081	0.00444718	0.355183	Pmf1
-0.267685	2.42551	9.17311	0.00315982	0.355183	Pmvk
-0.147022	5.50945	6.5227	0.0122352	0.355183	Pnkd
-0.262452	3.60769	7.56575	0.00711881	0.355183	Polr2j
-0.285303	3.51235	10.8109	0.00141382	0.355183	Polr3d
0.327715	6.0584	10.052	0.00204674	0.355183	Ppip5k1
0.184218	5.908	8.18364	0.0051942	0.355183	Ppm1b
0.751161	4.34768	7.59316	0.00701938	0.355183	Ppm1l
0.212045	6.22469	7.94296	0.00587001	0.355183	Ppp6r3
0.27413	4.81501	6.68419	0.0112416	0.355183	Prex2
0.27831	8.42402	11.8876	0.000842621	0.355183	Prkar1a
0.27723	3.19747	9.31767	0.00294067	0.355183	Prkdc
0.303738	3.65163	6.79791	0.0105929	0.355183	Prkg1
0.208118	6.04723	9.42354	0.00279021	0.355183	Prkrir
-0.296321	4.07334	8.8828	0.00365248	0.355183	Prr13
0.245207	3.03483	6.28824	0.0138443	0.355183	Prr14l
0.340352	7.47486	7.81224	0.00627472	0.355183	Prrc2b
0.548757	7.24808	8.16529	0.00524275	0.355183	Prune2
0.394374	2.99843	8.21103	0.00512259	0.355183	Ptch1
0.310605	7.87974	9.19373	0.00312755	0.355183	Ptpn11
0.326587	2.92155	6.27858	0.0139151	0.355183	Ptprf
0.32289	2.82672	8.22229	0.00509345	0.355183	Ptprj
0.449765	0.843563	10.2442	0.00186292	0.355183	Ptpro
-0.21814	4.24078	7.08038	0.00914483	0.355183	Pxmp4
-0.132982	5.69114	6.72383	0.0110109	0.355183	R3hdm4
0.265098	6.38914	7.60996	0.00695916	0.355183	Rab11fip5
0.189649	3.70467	6.2822	0.0138885	0.355183	Rab43
0.18709	5.22327	8.02211	0.00563821	0.355183	Rabep1
0.269405	3.99853	8.30615	0.00488176	0.355183	Rad54l2
0.231903	7.16306	6.39542	0.0130828	0.355183	Rapgef1
0.159127	4.37034	7.87364	0.00608112	0.355183	Rasa3
0.29504	2.88095	8.258	0.00500216	0.355183	Rassf4
0.235098	6.36584	6.61688	0.0116451	0.355183	Rbfox2
-0.158375	4.00436	7.74048	0.00650915	0.355183	Rbm10
0.174285	4.24185	6.50822	0.0123287	0.355183	Rbsn
0.421082	2.99587	7.58998	0.00703083	0.355183	Rest
-0.26998	1.3245	6.71857	0.0110413	0.355183	Rgs19
0.29005	3.45531	6.59299	0.0117919	0.355183	Rgs6
0.219606	6.78991	7.48982	0.00740198	0.355183	Rhoq
0.220463	4.54839	6.74788	0.0108733	0.355183	Rlim
0.132666	6.06787	6.8778	0.0101605	0.355183	Rnf14
0.42924	4.2191	8.72484	0.00395337	0.355183	Rnf144b
-0.187278	4.68644	6.92257	0.00992635	0.355183	Rnf181
-0.196399	2.9358	6.8218	0.0104616	0.355183	Rnf25
-0.214612	4.30388	11.2061	0.0011681	0.355183	Rnf5
0.479633	1.95437	7.97598	0.00577212	0.355183	Ror1
0.206891	3.40235	8.02833	0.0056204	0.355183	Rps6kc1
0.272359	5.19909	7.79181	0.00634055	0.355183	Rptor
0.304988	6.41462	7.53928	0.00721624	0.355183	Rragd
0.286617	4.18741	8.02095	0.00564154	0.355183	Rrp12
-0.497497	2.41178	6.4362	0.0128048	0.355183	Rtp4
-0.229521	2.38322	9.97167	0.00212909	0.355183	Ruvbl1
0.483376	10.4135	7.33067	0.00803427	0.355183	Ryr2
0.834554	1.89514	6.48556	0.0124764	0.355183	Sacs
0.28934	5.72148	8.3102	0.00487175	0.355183	Sec16a
0.419243	1.71911	6.75314	0.0108435	0.355183	Sepsecs
0.322796	1.67481	6.46676	0.0126004	0.355183	Sesn2
0.274727	5.34911	6.38697	0.0131412	0.355183	Setx
0.207411	3.52362	7.96624	0.00580082	0.355183	Sfmbt1
0.646542	4.19628	6.47904	0.0125193	0.355183	Sgcd
0.278498	3.2466	9.89862	0.0022069	0.355183	Sgk3
0.23412	4.08708	6.75183	0.0108509	0.355183	Sgpl1
0.422022	3.39357	7.04016	0.0093377	0.355183	Sik2
0.287287	7.36644	8.75725	0.00388961	0.355183	Slc16a1
0.425515	1.40685	8.25459	0.00501081	0.355183	Slc1a1
0.294047	4.1029	9.70485	0.00242788	0.355183	Slc23a2
0.544333	2.29643	8.36972	0.00472737	0.355183	Slc26a2
0.240253	6.48102	8.2983	0.00490118	0.355183	Slc35e1
0.387302	1.40023	7.74792	0.00648441	0.355183	Slc35g1
0.391255	1.61246	7.36161	0.00790709	0.355183	Slc36a4
0.32242	4.29968	6.48856	0.0124568	0.355183	Slc38a1
0.192774	4.2648	9.18416	0.00314249	0.355183	Slc39a9
0.26694	4.37831	7.88667	0.00604085	0.355183	Slc9a6
0.166606	6.56122	7.23252	0.00845201	0.355183	Slco3a1
0.218186	5.29596	9.61926	0.00253265	0.355183	Smad4
0.176844	5.18813	7.05081	0.00928623	0.355183	Smad5
-0.404797	1.62306	6.45044	0.0127091	0.355183	Smc2
0.271902	4.42947	6.53111	0.0121813	0.355183	Smcr8
0.327683	3.02963	8.51517	0.00439291	0.355183	Sntb2
0.190522	5.16826	6.60971	0.011689	0.355183	Snx19
0.513575	1.42635	11.8666	0.000851107	0.355183	Snx29
0.192446	3.21395	7.59733	0.00700439	0.355183	Snx33
0.758094	4.09398	12.8897	0.000524294	0.355183	Sorl1
0.138849	4.65418	7.62163	0.00691762	0.355183	Spin1
0.388318	7.21198	8.92116	0.00358307	0.355183	Sptb
0.163904	4.69854	7.92556	0.00592227	0.355183	Ssfa2
0.244136	5.79762	6.36246	0.0133122	0.355183	Stat5b
-0.180556	2.65888	6.35004	0.0133997	0.355183	Strada
0.160814	5.67259	7.13544	0.00888752	0.355183	Stt3b
-0.252333	3.03673	6.84052	0.0103599	0.355183	Suv420h2
0.42534	2.24231	9.21529	0.00309418	0.355183	Syne3
0.770205	1.54625	8.19089	0.00517513	0.355183	Syt12
-0.291971	2.09193	11.3437	0.00109328	0.355183	Tamm41
0.229859	3.16868	6.81854	0.0104794	0.355183	Tango6
0.341997	4.36397	11.5109	0.00100896	0.355183	Tbc1d5
0.173525	4.48777	6.95941	0.00973791	0.355183	Tbcel
0.325296	3.72771	7.21657	0.00852201	0.355183	Tbx3
-0.278326	2.19021	6.54335	0.0121032	0.355183	Tchp
0.359468	6.32343	9.25353	0.0030359	0.355183	Tcp11l2
-0.271944	1.53748	6.49026	0.0124456	0.355183	Tctn2
-0.26855	8.21509	6.91788	0.00995063	0.355183	Tecr
0.431759	0.805701	14.8236	0.000213637	0.355183	Tesk2
0.211903	5.53733	6.86678	0.010219	0.355183	Tex2
0.253978	3.78587	9.86585	0.00224275	0.355183	Tgfbr1
0.292784	5.45257	8.02407	0.00563258	0.355183	Tgfbr3
-0.144569	5.90093	10.1062	0.00199312	0.355183	Timm44
0.265584	3.31524	7.60979	0.00695976	0.355183	Tle4
-0.228288	2.8128	8.12763	0.00534391	0.355183	Tmem106c
0.229475	3.37349	8.41628	0.00461753	0.355183	Tmem117
-0.30504	3.43345	9.14335	0.00320699	0.355183	Tmem141
-0.207102	4.40779	7.67302	0.00673782	0.355183	Tmem150a
-0.40745	0.810609	9.42109	0.0027936	0.355183	Tmem154
-0.216417	1.91001	6.92133	0.00993276	0.355183	Tmem206
0.180426	4.10289	7.28921	0.00820802	0.355183	Tmem87b
-0.510189	4.65457	7.37779	0.00784139	0.355183	Tmsb10
0.327706	6.50551	6.31168	0.0136739	0.355183	Tmtc1
0.396786	4.50933	7.15794	0.00878452	0.355183	Tnik
0.442565	5.19483	6.69216	0.0111949	0.355183	Tnks
0.28415	9.94624	8.7809	0.00384374	0.355183	Tns1
-0.365394	1.99465	9.5327	0.00264339	0.355183	Tpd52l1
-0.202694	3.04871	6.492	0.0124343	0.355183	Trex1
0.276564	2.65204	9.86991	0.00223828	0.355183	Trim2
0.235661	6.87955	9.35731	0.00288338	0.355183	Trim63
0.453444	1.81172	10.0738	0.00202503	0.355183	Trpc1
0.271035	4.87714	7.62559	0.00690361	0.355183	Tsc1
0.188299	6.73457	6.46129	0.0126368	0.355183	Tsc2
0.218699	4.91691	7.75259	0.00646896	0.355183	Ttc19
0.348263	3.21876	10.0063	0.00209318	0.355183	Ttc37
0.393533	0.779675	6.61148	0.0116781	0.355183	Ttc39a
0.400777	3.47702	8.52446	0.0043724	0.355183	Ttll7
0.468458	4.9464	12.1683	0.000737276	0.355183	Tulp4
-0.16863	4.57884	6.54865	0.0120696	0.355183	Tusc2
0.266606	5.38638	10.38	0.00174337	0.355183	Txnrd1
-0.13423	4.44473	6.71944	0.0110362	0.355183	Ube2n
0.243823	4.69472	6.32937	0.0135467	0.355183	Ubr1
0.305841	4.07855	6.76603	0.0107707	0.355183	Uhrf1bp1
0.314853	2.67168	10.5943	0.00157059	0.355183	Urb2
0.201317	7.51105	6.96615	0.00970383	0.355183	Usp13
0.315519	6.56383	6.85403	0.0102872	0.355183	Usp24
0.198437	4.19473	6.52083	0.0122472	0.355183	Usp46
0.302502	2.52896	12.7998	0.000546939	0.355183	Usp6nl
0.268694	3.72319	7.30196	0.00815418	0.355183	Utp20
0.481551	0.719094	8.13034	0.00533656	0.355183	Vipr1
0.45163	5.63914	6.52396	0.0122271	0.355183	Vps13c
0.156139	3.94025	7.68807	0.0066861	0.355183	Vps36
-0.294218	3.96627	12.8397	0.000536759	0.355183	Vps72
0.248586	4.43784	7.12588	0.00893164	0.355183	Vps8
-0.192952	3.8921	8.44385	0.00455372	0.355183	Wash1
0.436341	2.47901	8.92049	0.00358428	0.355183	Wfikkn2
0.300312	6.41567	6.75162	0.0108521	0.355183	Wnk2
0.247866	5.39008	8.75694	0.0038902	0.355183	Wwc2
0.346079	4.22205	9.45395	0.00274848	0.355183	Xpo5
-0.31364	2.39976	10.6159	0.00155417	0.355183	Zbtb12
0.240133	6.83904	10.7508	0.00145564	0.355183	Zc3h7b
-0.232598	2.09377	7.27176	0.00828232	0.355183	Zc3h8
0.206424	5.15027	7.54674	0.00718865	0.355183	Zcchc14
0.306552	9.4201	6.60168	0.0117383	0.355183	Zfp106
0.254847	3.38514	6.3787	0.0131987	0.355183	Zfp251
0.262842	2.86836	7.35964	0.00791513	0.355183	Zfp280b
0.253437	1.98066	8.90004	0.00362112	0.355183	Zfp334
0.235774	3.48639	7.88688	0.00604021	0.355183	Zfp507
0.331913	2.74986	6.30059	0.0137542	0.355183	Zfp518b
0.290078	1.54837	7.9164	0.00594999	0.355183	Zfp709
0.283515	3.81599	7.5903	0.00702969	0.355183	Zfyve26
0.424505	0.423639	9.58955	0.00257012	0.355183	Zik1
0.379875	6.15766	10.333	0.00178382	0.355183	Zyg11b
0.258986	4.78165	7.05672	0.00925781	0.355183	Zzef1
-0.158497	11.1167	9.42287	0.00279114	0.355183	__ambiguous
0.159724	3.22673	6.23408	0.0142465	0.355425	Cask
-0.151871	3.24342	6.24302	0.0141793	0.355425	Gpn3
0.184383	3.15992	6.23802	0.0142169	0.355425	Gpr89
0.155148	5.12507	6.23776	0.0142188	0.355425	Lmbrd1
-0.24581	1.23435	6.23873	0.0142115	0.355425	Macrod2
0.137767	4.80951	6.23146	0.0142663	0.355425	Prpf18
-0.398955	2.42223	6.24984	0.0141282	0.355425	Sfi1
-0.297777	2.07477	6.24086	0.0141955	0.355425	Srpx2
-0.226018	3.8583	6.26278	0.0140319	0.355425	Trappc1
-0.283628	1.69447	6.2009	0.014499	0.357147	2700097O09Rik
-0.177994	4.08328	6.1854	0.0146186	0.357147	3110002H16Rik
0.422641	5.93958	5.9392	0.0166624	0.357147	4932438A13Rik
0.266825	4.40865	6.16998	0.0147384	0.357147	Acot11
-0.131153	8.82099	5.99694	0.0161576	0.357147	Ak1
0.199908	5.24136	6.03219	0.0158573	0.357147	Aldh5a1
0.485453	4.16023	6.0147	0.0160056	0.357147	Alg10b
-0.206921	3.88216	5.85299	0.0174472	0.357147	Alyref
-0.914504	4.11431	6.05774	0.015648	0.357147	Angptl4
0.24204	5.10663	5.97608	0.0163381	0.357147	Anxa11
0.146283	5.45335	5.89746	0.0170377	0.357147	Ap2b1
-0.254487	2.80448	5.8388	0.0175801	0.357147	Arrb2
0.345715	5.32055	5.8318	0.0176461	0.357147	Atp13a3
-0.346143	1.2056	5.99362	0.0161862	0.357147	Atp6v1g2
-0.123208	4.38598	6.04075	0.0157853	0.357147	Atpaf2
0.179045	5.3363	5.77808	0.0181607	0.357147	Bves
0.264745	5.36917	5.93879	0.016666	0.357147	Ckap5
-0.340157	4.80232	5.8782	0.0172138	0.357147	Clk1
0.327374	6.27998	5.89926	0.0170213	0.357147	Cnot1
0.279629	3.42262	6.13481	0.015016	0.357147	Col4a4
0.4722	4.45222	5.86719	0.0173153	0.357147	Ctnna3
-0.262622	5.74613	6.0174	0.0159826	0.357147	Dbi
0.482937	2.71409	6.01875	0.0159711	0.357147	Dct
0.172096	5.19315	6.04015	0.0157903	0.357147	Ddx21
0.231976	5.29521	5.92581	0.0167818	0.357147	Dgkd
0.208582	4.87691	5.98939	0.0162227	0.357147	Dicer1
-0.272358	2.31394	5.97689	0.0163311	0.357147	Dnaaf3
0.140094	4.88542	5.90031	0.0170118	0.357147	Dnajc10
0.365421	4.54829	6.11481	0.0151761	0.357147	Dnajc16
-0.308466	0.585186	6.07101	0.0155333	0.357147	Dtnb
0.173004	5.81089	6.03881	0.0158016	0.357147	Efr3a
0.354583	4.82305	5.96506	0.0164343	0.357147	Eif4ebp2
0.234384	4.70526	5.79176	0.0180281	0.357147	Extl1
-0.270727	5.705	5.77929	0.0181489	0.357147	Fam101b
-0.131278	3.51354	5.92544	0.0167852	0.357147	Fam3a
0.223061	5.68129	6.1424	0.0149556	0.357147	Fam63b
-0.255385	4.27799	5.88705	0.0171326	0.357147	Fam96b
-0.222409	2.68655	5.90393	0.016979	0.357147	Fcf1
0.367057	8.49246	6.17726	0.0146817	0.357147	Flnc
0.273587	5.56131	6.18498	0.0146218	0.357147	Fndc3b
0.452772	4.54044	6.208	0.0144446	0.357147	Foxn3
0.213779	2.22358	5.96046	0.0164746	0.357147	Galnt4
0.183953	2.62141	6.12943	0.0150589	0.357147	Galnt7
-0.360823	0.494478	5.95646	0.0165098	0.357147	Hdc
0.267748	5.84972	5.84082	0.0175611	0.357147	Herc2
0.175246	4.39402	5.80379	0.0179125	0.357147	Herc4
0.327615	6.09307	6.04126	0.015781	0.357147	Hif1an
-0.172262	5.62117	5.82848	0.0176774	0.357147	Higd2a
0.193561	8.04103	5.80721	0.0178797	0.357147	Hk2
0.395361	2.7766	5.81043	0.0178489	0.357147	Hmbox1
0.272404	4.61113	5.96302	0.0164521	0.357147	Htt
0.210311	5.06393	6.10857	0.0152266	0.357147	Ireb2
0.132541	4.70787	5.92881	0.0167551	0.357147	Kat7
0.175553	3.83211	5.82668	0.0176944	0.357147	Kdm5b
0.496329	1.79973	5.94762	0.0165878	0.357147	Kif26b
-0.240699	3.57921	5.80531	0.0178978	0.357147	Kif3a
0.413028	0.579382	6.05883	0.0156342	0.357147	Kif5c
0.221614	3.44165	6.05199	0.0156912	0.357147	Kirrel
0.353883	7.5144	5.86964	0.0172927	0.357147	Klhl24
0.56662	0.765368	6.17398	0.0147073	0.357147	Krt80
0.29336	4.58627	6.11455	0.0151783	0.357147	Lgr4
0.363959	4.99933	5.8472	0.0175014	0.357147	Lrba
0.212596	7.05583	5.80782	0.0178739	0.357147	Lrpprc
-0.231856	4.43726	5.93586	0.0166921	0.357147	Lsm4
0.280939	7.13278	5.79128	0.0180328	0.357147	2021-03-06
0.244338	5.29905	6.02288	0.015936	0.357147	Mon2
-0.162834	3.69446	5.97035	0.016388	0.357147	Mtif3
0.252115	3.20488	5.80775	0.0178746	0.357147	Myo5a
0.159774	6.18317	6.0332	0.0158487	0.357147	Nckap1
0.268506	4.86637	6.07277	0.0155188	0.357147	Ncoa1
-0.161091	3.53192	5.81796	0.0177771	0.357147	Ntan1
-0.134276	3.7576	5.96146	0.0164659	0.357147	Pbx2
0.258075	6.34679	6.10883	0.0152245	0.357147	Pcnx
0.230015	6.49676	6.1913	0.0145729	0.357147	Pcyt1a
-0.40621	2.44112	6.17325	0.0147129	0.357147	Phf11d
0.206867	5.58113	5.84621	0.0175106	0.357147	Pi4ka
0.236631	1.53132	6.11626	0.0151645	0.357147	Pigw
0.274064	5.34398	5.80258	0.0179241	0.357147	Pkn1
0.284469	2.13185	5.77518	0.0181889	0.357147	Plcl1
0.474409	0.558224	6.11248	0.015195	0.357147	Prdm11
0.148687	4.38475	6.00702	0.0160711	0.357147	Prkd3
0.612312	1.95519	6.19494	0.0145448	0.357147	Ptgfr
0.179119	3.53954	6.0936	0.0153481	0.357147	Ptpn9
0.150431	3.02092	5.96504	0.0164345	0.357147	Rab33b
0.262065	5.95778	5.79656	0.0179819	0.357147	Ralgapa1
0.23517	5.46462	5.77346	0.0182057	0.357147	Ralgapb
0.374257	6.53555	6.16763	0.0147568	0.357147	Rap1gap2
0.200049	4.29991	6.03563	0.0158283	0.357147	Rnf103
-0.208408	3.44228	6.10354	0.0152673	0.357147	Rps6kb2
0.172562	4.80374	6.19953	0.0145095	0.357147	Scap
-0.583838	0.64344	5.95007	0.0165662	0.357147	Scn10a
0.377016	8.02286	5.87082	0.0172818	0.357147	Scn5a
0.185583	5.90571	5.96619	0.0164244	0.357147	Sel1l
-0.213277	4.36954	6.06721	0.0155648	0.357147	2021-09-11
0.399213	3.98953	5.78759	0.0180685	0.357147	Setbp1
0.347006	2.10451	5.83847	0.0175832	0.357147	Shroom2
0.264959	5.45854	5.94608	0.0166014	0.357147	Shroom3
-0.350057	1.29817	6.06859	0.0155533	0.357147	Slc15a3
0.196578	2.61572	6.00686	0.0160724	0.357147	Slc35a5
0.393678	4.73008	6.07239	0.0155219	0.357147	Slc4a4
-0.198457	6.61021	5.83051	0.0176582	0.357147	Smtn
0.328722	3.61093	5.78718	0.0180724	0.357147	Sox6
-0.405623	4.25487	6.10279	0.0152733	0.357147	Sp100
-0.248252	3.15699	5.97914	0.0163115	0.357147	St6galnac2
-0.191863	4.82191	6.09335	0.0153501	0.357147	Stx4a
0.250787	6.27246	5.93469	0.0167025	0.357147	Sun2
0.331659	6.36602	5.89093	0.0170972	0.357147	Tbc1d16
0.261066	6.25578	5.79175	0.0180283	0.357147	Tfdp2
0.241591	1.68147	5.80742	0.0178777	0.357147	Tmem194
-0.412219	3.22817	6.0171	0.0159851	0.357147	Tnnt1
0.235362	5.58008	5.84383	0.0175329	0.357147	Trappc10
0.316039	3.60808	6.01749	0.0159818	0.357147	Trim23
-0.132468	3.00993	5.79308	0.0180154	0.357147	Tsr2
0.207899	2.73062	5.89175	0.0170897	0.357147	Tulp3
0.139768	4.20735	6.11161	0.0152019	0.357147	Ube2q2
0.200804	5.53894	5.77822	0.0181594	0.357147	Uggt1
0.242827	2.72474	5.88772	0.0171265	0.357147	Urb1
0.172464	4.69474	5.93552	0.0166951	0.357147	Usp22
0.148767	3.13111	6.13391	0.0150231	0.357147	Usp30
0.506723	6.47571	6.05392	0.0156751	0.357147	Usp9x
-0.18015	4.80024	5.91329	0.0168943	0.357147	Wbp1
-0.226226	3.81507	5.89601	0.0170508	0.357147	Wdr83os
0.195622	4.85044	6.07632	0.0154896	0.357147	Xpot
-0.291053	2.34994	5.83363	0.0176287	0.357147	Zfp444
0.234457	3.83421	5.89308	0.0170775	0.357147	Znrf2
0.227006	2.95969	5.76126	0.0183251	0.358395	Mb21d2
0.255884	8.07138	5.76062	0.0183314	0.358395	Plec
-0.196987	2.691	5.7572	0.018365	0.358444	Eef2kmt
0.740952	3.16965	5.74924	0.0184435	0.358762	Nt5c1a
0.356238	1.86922	5.75153	0.0184209	0.358762	Zfp398
0.233684	3.6698	5.70428	0.0188936	0.359295	2310035C23Rik
0.234651	7.6181	5.73913	0.0185437	0.359295	Agl
0.232442	3.27832	5.70879	0.018848	0.359295	Bend3
0.234583	3.93793	5.69551	0.0189828	0.359295	Ept1
0.177655	4.7012	5.68824	0.0190571	0.359295	Exoc6
0.317255	4.85382	5.70217	0.018915	0.359295	Fat1
0.331365	5.07062	5.69469	0.0189911	0.359295	Grm1
0.240897	4.37783	5.68369	0.0191036	0.359295	Itgav
-0.299359	2.49758	5.71682	0.018767	0.359295	Mcm2
0.24187	6.31631	5.6962	0.0189758	0.359295	Mut
-0.360973	1.08264	5.68206	0.0191204	0.359295	Opn4
0.665342	6.26988	5.68161	0.019125	0.359295	Ppp1r12b
-0.361349	3.191	5.69338	0.0190045	0.359295	Rap1gap
0.202605	4.86644	5.68706	0.0190691	0.359295	Slc12a2
-0.195224	6.76235	5.71512	0.0187841	0.359295	Slc25a20
0.252692	2.5782	5.68826	0.0190568	0.359295	Snx30
-0.353631	1.22895	5.70906	0.0188453	0.359295	Spc24
0.260171	6.31702	5.72205	0.0187144	0.359295	Tln2
0.240387	5.54054	5.69044	0.0190345	0.359295	Ube3c
-0.198016	3.06109	5.68298	0.019111	0.359295	Utp11l
-0.419824	2.18308	5.71021	0.0188337	0.359295	Xaf1
0.243972	6.36702	5.66323	0.0193148	0.359538	Akap13
0.233658	2.21975	5.67287	0.019215	0.359538	Cdyl2
0.223307	4.34159	5.66988	0.0192459	0.359538	Inadl
0.206181	4.95916	5.65925	0.0193561	0.359538	Osbpl3
-0.270173	1.35152	5.66494	0.019297	0.359538	Slc25a45
-0.238736	2.6784	5.66004	0.0193479	0.359538	Tmub1
0.295175	4.27013	5.67581	0.0191847	0.359538	Wdr7
0.216259	3.58429	5.6455	0.0194996	0.361318	Cep170b
0.184043	5.85463	5.64109	0.0195459	0.361318	Sidt2
0.23087	4.68905	5.64375	0.019518	0.361318	Zfp36l2
0.29216	6.861	5.62688	0.0196959	0.361771	Atf6
0.224267	3.73376	5.63202	0.0196416	0.361771	Btaf1
0.268945	7.30868	5.63351	0.0196258	0.361771	Rbm20
0.43906	3.27777	5.62785	0.0196856	0.361771	Xrn1
-0.199055	3.18137	5.60542	0.0199246	0.36209	0610010K14Rik
0.340523	7.26091	5.60666	0.0199113	0.36209	3425401B19Rik
0.172353	6.04569	5.59714	0.0200136	0.36209	Crk
0.19859	3.06452	5.58094	0.0201889	0.36209	Dis3
0.256951	7.37693	5.5959	0.0200269	0.36209	Fam210a
0.196953	4.91523	5.57795	0.0202214	0.36209	Gapvd1
0.315171	6.95242	5.61308	0.0198426	0.36209	Hectd1
-0.251147	3.49708	5.58065	0.020192	0.36209	Lsm6
-0.172107	3.68104	5.57561	0.0202469	0.36209	Mrpl22
-0.248617	4.96383	5.6212	0.0197562	0.36209	Mrps15
0.275893	4.57865	5.58317	0.0201647	0.36209	Pcx
0.154419	4.15197	5.59568	0.0200293	0.36209	Pdcd11
0.24021	4.81186	5.60182	0.0199632	0.36209	Plce1
0.297982	5.19133	5.59724	0.0200125	0.36209	Plxna1
-0.227281	6.02231	5.59364	0.0200514	0.36209	Rab11b
-0.192685	2.23859	5.58976	0.0200932	0.36209	Rnf122
-0.162851	3.96029	5.58917	0.0200997	0.36209	Sharpin
0.336777	2.87716	5.56654	0.0203461	0.36274	Atp7a
0.273551	4.34041	5.56767	0.0203337	0.36274	Pi4k2a
-0.293287	0.715792	5.54555	0.0205775	0.362939	Cchcr1
-0.156136	5.13849	5.54971	0.0205315	0.362939	Mapre3
-0.209186	3.96178	5.54969	0.0205317	0.362939	Mrpl40
0.424629	4.3603	5.555	0.0204731	0.362939	Pdp2
-0.412109	0.433579	5.56195	0.0203965	0.362939	Ripk3
0.336232	9.26302	5.55963	0.020422	0.362939	Sorbs1
0.207214	2.47515	5.54672	0.0205646	0.362939	Tspyl5
0.30645	5.65315	5.53128	0.0207365	0.364064	Lrrc58
-0.139804	5.91253	5.53695	0.0206732	0.364064	Mrpl4
0.344897	4.82256	5.53191	0.0207294	0.364064	Pds5a
0.344313	6.10115	5.5285	0.0207676	0.364064	Ralgapa2
0.411461	3.67727	5.51488	0.0209208	0.364291	D830031N03Rik
0.431324	3.23219	5.50773	0.0210016	0.364291	Dpy19l4
0.28059	6.57488	5.51939	0.0208699	0.364291	Lpgat1
0.0979116	5.5352	5.52163	0.0208447	0.364291	Lsm14a
-0.283907	1.0418	5.51321	0.0209396	0.364291	Rabl2
0.22741	3.9201	5.51764	0.0208896	0.364291	Smad3
-0.138076	3.79108	5.51026	0.020973	0.364291	Yeats4
-0.320442	3.25212	5.49706	0.021123	0.365779	Cep128
0.149437	5.43632	5.49462	0.0211508	0.365779	Prosc
0.158684	8.38283	5.47713	0.0213515	0.36784	Clic4
-0.28873	1.06546	5.47221	0.0214084	0.36784	Gimap9
0.179845	6.77228	5.46844	0.021452	0.36784	Jak1
0.135974	5.17705	5.46763	0.0214613	0.36784	Pak2
0.641206	5.4288	5.47081	0.0214244	0.36784	Pdpr
-0.170412	3.41518	5.47525	0.0213732	0.36784	Sap18
-0.602573	1.34541	5.46479	0.0214943	0.367859	Lrp2bp
0.387863	1.90449	5.45844	0.0215682	0.368145	Camk1d
-0.217821	3.96538	5.45787	0.0215749	0.368145	Prickle3
0.26344	3.43946	5.27067	0.0238784	0.368964	2410131K14Rik
0.27417	3.95643	5.27885	0.0237726	0.368964	5930403L14Rik
-0.188468	3.82674	5.26948	0.0238939	0.368964	Ablim2
-0.223502	2.78021	5.28925	0.0236386	0.368964	Abracl
-0.660958	3.252	5.45096	0.0216556	0.368964	Acot1
0.259114	4.69201	5.29257	0.0235961	0.368964	Ankrd33b
0.280459	6.6754	5.31783	0.0232747	0.368964	Arfgef1
0.214489	5.70573	5.29109	0.023615	0.368964	Arhgef17
-0.121572	4.83802	5.37191	0.0226021	0.368964	Atp5sl
0.152621	4.2568	5.27961	0.0237628	0.368964	Atp6v1a
0.24105	4.53689	5.41198	0.022117	0.368964	Bach1
-0.155073	4.62368	5.34367	0.0229507	0.368964	Cdk4
-0.236328	3.8548	5.41557	0.022074	0.368964	Cebpzos
0.33231	3.26506	5.29573	0.0235556	0.368964	Celsr1
0.335373	4.36915	5.38297	0.0224671	0.368964	Cog5
0.231017	4.55806	5.33084	0.023111	0.368964	Cped1
0.201811	4.50744	5.34974	0.0228753	0.368964	Cpne3
0.155085	3.84148	5.27889	0.023772	0.368964	D15Ertd621e
-0.141969	4.66286	5.3108	0.0233637	0.368964	Dctn6
0.109416	6.95004	5.40869	0.0221563	0.368964	Dennd5a
0.213449	3.67692	5.35145	0.0228541	0.368964	Dnajc27
0.332707	9.95754	5.34017	0.0229943	0.368964	Dsp
0.367248	0.708795	5.39001	0.0223816	0.368964	Dusp4
0.375549	2.90347	5.27515	0.0238204	0.368964	Ern1
0.356309	0.984097	5.32103	0.0232343	0.368964	F8
0.163554	4.01952	5.28005	0.0237571	0.368964	Fam160b1
-0.192288	3.15688	5.39469	0.022325	0.368964	Gm8615
0.366793	2.75521	5.28655	0.0236733	0.368964	Gnb3
0.315684	7.81827	5.34119	0.0229815	0.368964	Hipk3
-0.223881	2.49611	5.43041	0.0218975	0.368964	Hscb
0.43612	0.940816	5.34387	0.0229482	0.368964	Kif1a
0.139486	3.51142	5.32406	0.0231961	0.368964	Kif3b
0.212562	7.76852	5.3685	0.0226439	0.368964	Lamc1
0.242048	5.89827	5.395	0.0223212	0.368964	Limd1
0.167003	5.96676	5.28313	0.0237174	0.368964	Lman1
-0.152488	5.00284	5.3926	0.0223502	0.368964	Lyrm5
0.218244	4.74908	5.39675	0.0223	0.368964	Man1a
0.467265	2.43312	5.28818	0.0236524	0.368964	Mgat5
0.472964	3.57255	5.41257	0.0221099	0.368964	Mob1b
-0.257219	1.82789	5.32971	0.0231251	0.368964	Morn2
-0.200803	1.50381	5.44096	0.021773	0.368964	Mthfd2l
0.191227	5.86852	5.44309	0.0217479	0.368964	Mtmr3
0.222355	4.0785	5.33285	0.0230857	0.368964	Mtmr4
0.38554	3.96208	5.28803	0.0236542	0.368964	Mybpc2
0.179107	4.69236	5.39651	0.0223029	0.368964	Nt5c2
-0.146923	3.66799	5.34961	0.0228769	0.368964	Nt5dc2
0.234847	2.88208	5.41494	0.0220816	0.368964	Otud3
0.575341	5.2545	5.41728	0.0220536	0.368964	Pde3a
0.161989	7.2094	5.27462	0.0238272	0.368964	Pdk1
-0.41232	0.950555	5.43892	0.021797	0.368964	Plekhb1
-0.222791	2.37144	5.40629	0.0221851	0.368964	Prkrip1
0.210335	5.27721	5.3364	0.0230413	0.368964	Ptpn14
0.262248	2.60663	5.37188	0.0226025	0.368964	Pxylp1
-0.26761	5.23506	5.42674	0.021941	0.368964	Rnasek
-0.164639	4.76996	5.33342	0.0230786	0.368964	Rnf166
0.11678	4.4999	5.29247	0.0235973	0.368964	Rnf4
-0.244159	3.63228	5.34796	0.0228973	0.368964	Slc25a37
0.202057	5.82374	5.30114	0.0234864	0.368964	Slc41a1
0.313483	4.1459	5.41491	0.0220819	0.368964	Smad7
-0.158924	2.69871	5.31811	0.0232711	0.368964	Smg9
0.254707	2.6135	5.26976	0.0238902	0.368964	Ssh1
0.177564	4.88109	5.39444	0.022328	0.368964	Synrg
0.204693	3.73624	5.35482	0.0228124	0.368964	Tbc1d24
-0.155085	2.19174	5.35821	0.0227705	0.368964	Tdp1
0.23875	3.51903	5.38647	0.0224245	0.368964	Tiparp
0.323808	2.748	5.27243	0.0238557	0.368964	Tmtc2
-0.375618	0.427194	5.44652	0.0217076	0.368964	Tsacc
0.252396	3.57322	5.29297	0.0235909	0.368964	Tspyl4
0.269868	4.13413	5.32171	0.0232257	0.368964	Ttc39b
0.158032	4.67431	5.37777	0.0225305	0.368964	Wdr37
0.290287	3.95577	5.38442	0.0224494	0.368964	Zfp346
-0.336026	9.64917	5.26558	0.0239445	0.369252	Cox6a2
0.16552	4.46663	5.25251	0.0241153	0.371389	Syk
0.259829	8.74609	5.24515	0.024212	0.37205	Dag1
0.163781	4.62378	5.24434	0.0242227	0.37205	Sertad2
0.445682	5.28307	5.23324	0.0243694	0.373805	Myocd
0.167393	5.9258	5.21835	0.0245677	0.374687	Arhgap31
-0.176343	2.52768	5.21451	0.024619	0.374687	Casp6
0.157021	5.6672	5.20652	0.0247264	0.374687	Faf1
-0.178874	9.74012	5.2193	0.024555	0.374687	Fth1
0.30437	5.17728	5.22252	0.024512	0.374687	Gfod1
0.38064	3.52517	5.21308	0.0246382	0.374687	Hdac4
0.14283	3.33307	5.21111	0.0246647	0.374687	Mfsd8
0.182279	4.74247	5.20493	0.0247478	0.374687	Scaf8
0.252654	3.69672	5.22222	0.024516	0.374687	Wdr81
-0.183637	3.52999	5.20464	0.0247517	0.374687	Zfp523
0.16561	2.9349	5.18981	0.0249524	0.374773	Champ1
-0.246564	3.23418	5.18992	0.0249509	0.374773	Clasrp
0.187838	2.87975	5.19315	0.0249071	0.374773	Foxn2
0.19771	3.02581	5.19646	0.0248623	0.374773	Rnf217
0.394595	7.75213	5.19139	0.0249309	0.374773	Tead1
0.331575	4.9424	5.19005	0.0249492	0.374773	Tnpo1
0.294879	1.65543	5.17994	0.025087	0.375329	Lrrc16a
-0.184859	2.93456	5.18275	0.0250486	0.375329	Nudt6
0.260604	3.05507	5.18014	0.0250843	0.375329	Zbtb33
-0.14446	3.28376	5.17629	0.025137	0.37559	0610009B22Rik
0.295344	6.1105	5.14629	0.0255515	0.378357	Adcy5
-0.135318	5.11095	5.12755	0.0258141	0.378357	Coq3
-0.184532	4.14483	5.11413	0.0260039	0.378357	Evl
0.261387	4.96765	5.13918	0.0256508	0.378357	Hivep1
0.141914	5.24039	5.13636	0.0256904	0.378357	Lars
0.145279	4.97108	5.12651	0.0258288	0.378357	Map3k3
-0.173169	12.8526	5.14714	0.0255397	0.378357	Mb
0.213669	5.70546	5.13846	0.0256609	0.378357	Mycbp2
0.198327	4.8196	5.11363	0.026011	0.378357	Nr2c2
0.400329	6.63671	5.12857	0.0257997	0.378357	Pcdh7
0.173079	4.48652	5.15954	0.0253676	0.378357	Pcgf5
0.217913	7.20735	5.12481	0.0258528	0.378357	Pptc7
0.107203	7.25842	5.13768	0.0256719	0.378357	Prpf19
0.219785	6.98495	5.12886	0.0257957	0.378357	Prpf8
-0.186787	5.01286	5.11411	0.0260042	0.378357	Rab3a
0.148632	5.20311	5.12098	0.0259069	0.378357	Rab3gap1
0.163623	4.43639	5.13706	0.0256805	0.378357	Rab3gap2
-0.324877	3.98032	5.15531	0.0254261	0.378357	Rps4l
0.163751	4.74491	5.15686	0.0254046	0.378357	Sft2d2
-0.243507	2.09502	5.11608	0.0259764	0.378357	Srgap1
0.492643	2.43083	5.12517	0.0258477	0.378357	Uhmk1
0.301162	4.40089	5.10665	0.0261104	0.378697	Hmcn1
0.259217	4.73733	5.10507	0.0261329	0.378697	Man2a1
0.174652	2.5147	5.10771	0.0260953	0.378697	Osgin2
-0.160767	8.80841	5.09871	0.0262239	0.379539	Hadh
0.181286	3.96415	5.09362	0.0262969	0.379643	Ranbp6
0.154101	6.06437	5.09392	0.0262927	0.379643	Vps35
0.19319	2.59218	5.08932	0.0263589	0.380062	Cdyl
-0.346731	0.642208	5.08519	0.0264183	0.380443	Zmynd15
-0.110998	4.54296	5.07576	0.0265549	0.380561	1110004F10Rik
-0.351941	1.63154	5.07551	0.0265585	0.380561	Gzmm
-0.190261	4.12691	5.08216	0.0264622	0.380561	Tmem11
0.300389	5.52604	5.07966	0.0264984	0.380561	Wdfy3
0.277359	5.9123	5.05471	0.0268624	0.381384	Aak1
0.196383	4.66608	5.05835	0.0268089	0.381384	Agps
-0.269249	2.61728	5.05622	0.0268402	0.381384	Ccdc181
0.203903	6.44096	5.06687	0.0266842	0.381384	Dlc1
0.122582	5.54086	5.06214	0.0267534	0.381384	Mybbp1a
0.164097	3.87285	5.05834	0.0268091	0.381384	Nol11
0.258368	1.92542	5.05348	0.0268804	0.381384	Pag1
-0.297394	2.02596	5.06219	0.0267527	0.381384	Pcgf2
0.285223	5.74597	5.04752	0.0269682	0.381925	Aff1
0.233672	6.57828	5.03584	0.0271412	0.381925	Alkbh5
0.196321	5.17937	5.04284	0.0270374	0.381925	Ibtk
0.299946	0.395202	5.033	0.0271834	0.381925	Lurap1
-0.250501	1.92344	5.03702	0.0271237	0.381925	Mir568
0.169357	4.35038	5.03969	0.027084	0.381925	Slc30a1
0.221357	7.84511	5.03385	0.0271708	0.381925	Trak2
0.145869	5.86292	5.03679	0.0271271	0.381925	Ttc7b
0.275318	0.718403	5.01748	0.0274154	0.384249	Glyctk
-0.120742	8.71476	5.01893	0.0273937	0.384249	Ndufa10
-0.188952	6.66884	5.0136	0.0274737	0.384599	Ube2m
-0.23212	1.10132	5.00897	0.0275436	0.384648	Bbs5
0.282613	2.98226	5.00895	0.0275439	0.384648	Zfp526
-0.260134	2.6745	5.00502	0.0276031	0.385009	2310033P09Rik
0.220863	5.1662	4.98917	0.0278441	0.385326	Ampd3
0.23402	2.80463	4.98631	0.0278878	0.385326	Arhgap42
0.133661	4.0512	4.99688	0.0277266	0.385326	Fbxo28
0.293882	5.78446	4.99734	0.0277196	0.385326	Fsd1l
0.20359	3.31361	4.988	0.0278619	0.385326	Heatr1
-0.176309	6.83093	4.98692	0.0278784	0.385326	Itgb1bp2
0.268125	5.18083	4.98596	0.0278931	0.385326	Phka1
0.173144	4.94672	4.99067	0.0278211	0.385326	Tbl1xr1
0.337891	1.69743	4.98082	0.0279718	0.385431	Bmper
-0.200193	3.30253	4.97678	0.0280338	0.385431	Cracr2b
0.152401	5.13763	4.97984	0.0279869	0.385431	Fbxl17
0.135938	5.63882	4.97675	0.0280343	0.385431	Nucks1
-0.264957	0.928392	4.96334	0.0282413	0.385555	A730017L22Rik
0.272932	2.68941	4.96237	0.0282563	0.385555	AW011738
0.142553	6.62296	4.94831	0.0284753	0.385555	Cab39
-0.204507	1.40511	4.952	0.0284177	0.385555	Dtwd1
-0.208131	6.07576	4.96423	0.0282276	0.385555	Edf1
0.127004	6.58464	4.96987	0.0281403	0.385555	Eif5
0.223652	5.83609	4.94643	0.0285046	0.385555	Extl3
0.587086	5.03711	4.94468	0.028532	0.385555	Foxo3
0.110937	4.07896	4.94376	0.0285465	0.385555	Fut8
-0.607387	1.14758	4.94992	0.0284501	0.385555	Isg15
0.108047	5.45358	4.94174	0.0285782	0.385555	Mbtps1
0.259006	1.17469	4.9694	0.0281475	0.385555	Mcm9
-0.24455	1.70561	4.95568	0.0283603	0.385555	Rpain
-0.132981	3.67678	4.94447	0.0285353	0.385555	Slc25a19
-0.352893	2.14529	4.95252	0.0284094	0.385555	Sp110
0.28611	7.99524	4.97391	0.028078	0.385555	Svil
0.194777	6.68939	4.93799	0.028637	0.385808	Sar1a
0.195258	6.60799	4.93628	0.0286639	0.385808	Usp28
0.215042	4.31001	4.93159	0.0287379	0.38601	Gtf3c4
0.22047	6.38962	4.92707	0.0288094	0.38601	Pm20d2
-0.145513	2.91899	4.92889	0.0287805	0.38601	Rexo4
0.166693	6.19833	4.92685	0.0288127	0.38601	Snrnp200
0.214226	5.54528	4.9107	0.0290695	0.387589	Amotl2
-0.142913	4.50496	4.90597	0.0291454	0.387589	B3gat3
0.370838	2.99388	4.91552	0.0289927	0.387589	C1galt1
0.644749	4.83353	4.90312	0.0291909	0.387589	Chrm2
0.166223	3.57138	4.91425	0.0290129	0.387589	Ddhd2
0.241673	2.58628	4.9026	0.0291994	0.387589	Eml6
-0.137919	4.88857	4.90669	0.0291337	0.387589	Ssbp3
0.156606	2.91898	4.90354	0.0291843	0.387589	Wdr91
0.289656	7.52127	4.90033	0.0292358	0.387626	Kif1b
-0.204078	2.23254	4.88839	0.0294283	0.387935	Akip1
0.191061	3.59875	4.88776	0.0294386	0.387935	Als2
0.203244	5.08241	4.89267	0.0293592	0.387935	Cerk
0.257211	3.60633	4.88263	0.0295217	0.387935	Dock4
-0.214514	4.20321	4.88224	0.0295281	0.387935	Fdft1
0.185086	4.49276	4.88414	0.0294973	0.387935	Sec23ip
0.244057	5.39726	4.88636	0.0294613	0.387935	Stk24
-0.400557	3.17575	4.89572	0.0293099	0.387935	Ube2l6
-0.181879	2.82745	4.88005	0.0295638	0.387961	Cdk2
0.351143	1.27411	4.8689	0.0297456	0.388038	Arhgef37
0.131514	4.89743	4.87303	0.0296781	0.388038	Cyth3
0.25323	5.45384	4.86527	0.0298051	0.388038	Lmtk2
-0.309169	0.826149	4.86589	0.029795	0.388038	Mitd1
0.516996	3.65248	4.87264	0.0296846	0.388038	Nrip1
0.246997	4.88829	4.86664	0.0297827	0.388038	Secisbp2l
0.308217	2.5773	4.8688	0.0297474	0.388038	Xpnpep3
0.156246	4.70737	4.86191	0.0298603	0.388318	Cand1
-0.343997	2.55298	4.85057	0.0300474	0.389555	AW112010
0.143017	4.38951	4.84825	0.0300858	0.389555	Acap2
0.142973	4.10717	4.84183	0.0301924	0.389555	Aldh7a1
0.275597	3.37796	4.83662	0.0302792	0.389555	Arap2
0.180679	5.18514	4.83712	0.0302708	0.389555	Arnt
-0.152566	5.04936	4.8404	0.0302161	0.389555	Aup1
0.320744	1.83692	4.83578	0.0302931	0.389555	Cnga3
0.194748	6.71458	4.84332	0.0301676	0.389555	Csnk1a1
0.158304	3.15463	4.83986	0.030225	0.389555	Ficd
0.227648	4.27253	4.85082	0.0300433	0.389555	Inpp4a
-0.238759	5.25019	4.83176	0.0303603	0.389984	Gpx1
0.259425	2.95635	4.82777	0.0304272	0.390409	Ebf2
0.174053	6.77019	4.82336	0.0305012	0.390924	Usp47
0.238247	3.93825	4.81946	0.0305669	0.39133	Skil
-0.203471	3.61493	4.81009	0.0307252	0.392486	Elmod3
0.295288	3.80375	4.81022	0.030723	0.392486	Slc4a7
-0.198937	3.21026	4.80085	0.0308822	0.394055	Rogdi
0.336214	7.14117	4.79872	0.0309185	0.394082	Prkaa2
-0.237471	1.44006	4.79578	0.0309686	0.394286	Fgf11
0.245128	3.43661	4.76284	0.0315369	0.395008	Appbp2
-0.175013	5.71714	4.78525	0.031149	0.395008	Arap3
0.171209	7.61259	4.75304	0.0317081	0.395008	Art3
0.373023	2.27773	4.74317	0.0318815	0.395008	Cmtr1
0.181601	5.0726	4.77058	0.0314025	0.395008	Ep400
0.113892	4.36862	4.74644	0.031824	0.395008	Fzd6
0.135324	6.36839	4.76536	0.031493	0.395008	Galnt1
-0.266573	1.41384	4.77681	0.0312946	0.395008	Haus3
0.259994	5.18812	4.77635	0.0313025	0.395008	Hspa4l
0.201806	5.51349	4.76349	0.0315255	0.395008	Klhdc10
-0.331941	4.20052	4.76635	0.0314758	0.395008	Lgals9
0.256057	2.90905	4.7793	0.0312516	0.395008	Lyst
-0.169768	5.25188	4.75198	0.0317267	0.395008	Mapk3
0.235392	2.99625	4.78565	0.0311422	0.395008	Myof
0.339635	2.43616	4.77058	0.0314025	0.395008	Nav3
-0.242736	7.7716	4.74481	0.0318526	0.395008	Ndufa13
-0.221638	3.23743	4.74751	0.0318051	0.395008	Nlgn2
0.221603	4.34443	4.75382	0.0316944	0.395008	Osbpl11
0.204564	3.68634	4.75486	0.0316763	0.395008	Rgmb
0.210414	2.76388	4.75485	0.0316764	0.395008	Spopl
0.155553	3.61466	4.74319	0.0318812	0.395008	Suco
0.205174	2.57885	4.76131	0.0315636	0.395008	Tbc1d8b
0.155783	3.26261	4.74547	0.0318409	0.395008	Trim37
-0.277639	0.727825	4.75684	0.0316415	0.395008	Wdr76
-0.263459	8.94378	4.78885	0.0310873	0.395008	Ybx1
0.174953	5.87267	4.73958	0.0319449	0.39537	Nploc4
-0.30396	0.484446	4.73632	0.0320025	0.395658	Ccdc176
0.240934	3.14569	4.72476	0.0322077	0.395723	Arl4c
-0.20656	2.63145	4.72676	0.0321721	0.395723	Bmyc
-0.218803	4.19252	4.7225	0.0322479	0.395723	Dnaja1
0.275119	3.59387	4.72866	0.0321382	0.395723	Mtmr9
0.231137	4.01558	4.7271	0.032166	0.395723	Pnpla7
0.145241	6.50949	4.72496	0.0322041	0.395723	Ppp2r5c
0.272651	4.33278	4.72265	0.0322453	0.395723	Vps13b
-0.244409	3.4523	4.70864	0.0324961	0.397922	Mxra7
0.255996	4.73144	4.70905	0.0324889	0.397922	Usp32
0.230662	2.91775	4.70055	0.032642	0.398507	Ahr
0.204506	5.1825	4.69421	0.0327569	0.398507	Kcnj12
0.192045	6.2712	4.69477	0.0327466	0.398507	Mgea5
0.451027	2.74705	4.70001	0.0326517	0.398507	N4bp2
0.198434	4.85846	4.69262	0.0327857	0.398507	Rapgef2
-0.250391	2.20642	4.69317	0.0327757	0.398507	Sdccag8
0.204968	7.47602	4.69817	0.0326851	0.398507	Ywhag
0.237439	4.06237	4.67866	0.03304	0.399475	Abcb1a
0.225972	4.65004	4.67804	0.0330514	0.399475	Nf1
-0.0933824	7.3313	4.68357	0.0329503	0.399475	Pcbp2
-0.250047	1.054	4.67775	0.0330567	0.399475	Ppih
0.270598	3.42562	4.68063	0.0330041	0.399475	Slc2a1
0.169723	7.18471	4.67685	0.0330731	0.399475	Tln1
0.171829	6.65132	4.6731	0.033142	0.399888	Ddx6
0.160432	7.26925	4.66981	0.0332024	0.400199	Nrp1
0.192737	4.05785	4.66488	0.0332933	0.400456	Abca3
0.252506	1.54474	4.66576	0.0332771	0.400456	Actr5
0.196664	3.82934	4.65915	0.0333991	0.400665	Ankib1
0.151885	5.06307	4.65831	0.0334148	0.400665	Atl2
0.452438	6.61479	4.66084	0.0333679	0.400665	Dmd
0.273217	3.57992	4.65155	0.0335403	0.401226	Atm
0.181195	5.32854	4.65169	0.0335377	0.401226	Kank1
-0.218871	1.78629	4.65017	0.0335659	0.401226	Zfp653
0.163135	3.0728	4.64148	0.033728	0.402329	Ing5
-0.277404	3.41454	4.64304	0.0336989	0.402329	Scnm1
0.265256	5.16223	4.61588	0.0342106	0.402381	Akap11
-0.148839	2.94832	4.63704	0.0338112	0.402381	Commd7
0.205462	5.82152	4.6172	0.0341854	0.402381	Csdc2
0.152992	6.35934	4.63164	0.0339127	0.402381	Fam20b
0.394126	5.64879	4.62053	0.0341223	0.402381	Fnip1
-0.14569	4.78015	4.62721	0.033996	0.402381	Hmg20b
-0.241163	1.94709	4.61535	0.0342207	0.402381	Hn1l
0.204366	3.09926	4.61725	0.0341845	0.402381	Kbtbd7
-0.147497	3.62189	4.61645	0.0341998	0.402381	Med4
0.17423	4.50036	4.63549	0.0338402	0.402381	Phlpp1
-0.164574	2.53399	4.61748	0.0341801	0.402381	Pigx
0.159984	5.30459	4.62197	0.0340951	0.402381	Rab11fip3
0.34024	2.72388	4.61691	0.0341909	0.402381	Rps6ka5
0.12761	5.29635	4.63778	0.0337972	0.402381	Rrn3
0.314868	5.77612	4.60927	0.0343364	0.40333	Tmem245
0.256874	2.43	4.60581	0.0344023	0.403528	Cnnm2
0.167232	5.78736	4.60289	0.0344582	0.403528	Dlg1
-0.135173	5.53107	4.60462	0.0344251	0.403528	Sdr39u1
-0.123884	5.15729	4.59835	0.0345451	0.40412	Rabggtb
0.345392	2.42368	4.5966	0.0345788	0.40412	Reln
0.187934	3.98587	4.58047	0.0348901	0.405207	Ankrd50
0.199143	3.51909	4.58091	0.0348815	0.405207	Atr
-0.168337	3.73736	4.58004	0.0348984	0.405207	Lyrm2
0.225944	3.51188	4.5842	0.0348179	0.405207	Mrvi1
0.460284	3.35128	4.5836	0.0348295	0.405207	Nr3c2
0.154415	5.54442	4.57905	0.0349177	0.405207	Pik3ca
0.560693	3.78506	4.58567	0.0347895	0.405207	Ptpn4
-0.195972	3.18413	4.57658	0.0349657	0.405356	Stap2
0.450819	1.69267	4.56478	0.0351958	0.407215	Cntfr
0.323151	3.35493	4.56474	0.0351967	0.407215	Fam8a1
-0.503588	1.09728	4.5449	0.0355873	0.407241	A930016O22Rik
-0.15307	5.15511	4.54744	0.035537	0.407241	Clta
-0.258351	3.27629	4.55088	0.0354689	0.407241	Frg1
0.197436	6.67025	4.55972	0.035295	0.407241	Furin
0.18808	4.13092	4.5621	0.0352483	0.407241	Gpalpp1
0.227788	1.88561	4.5481	0.0355239	0.407241	Nfxl1
0.173111	4.23775	4.54621	0.0355613	0.407241	Nup214
-0.264614	4.18759	4.55804	0.0353279	0.407241	Rnf144a
0.180762	9.81231	4.54859	0.0355142	0.407241	Srl
0.226897	5.67487	4.54509	0.0355834	0.407241	Ubxn2a
0.139819	4.11376	4.5523	0.035441	0.407241	Usp12
0.286835	2.61172	4.54303	0.0356242	0.40726	Lonrf2
0.1534	4.6902	4.53704	0.0357432	0.407423	Atf1
0.408786	0.900654	4.53698	0.0357445	0.407423	Btbd11
0.184106	6.11545	4.53813	0.0357217	0.407423	Ulk2
0.151432	4.54637	4.53241	0.0358355	0.407655	Arhgap23
0.20406	2.70294	4.53277	0.0358283	0.407655	Pign
0.281631	3.82078	4.5178	0.0361284	0.410582	Rev3l
-0.149032	3.04684	4.5078	0.0363301	0.411715	Ino80e
0.18791	6.01122	4.50599	0.0363669	0.411715	Pdgfrb
0.31295	3.40197	4.50478	0.0363914	0.411715	Pggt1b
0.193509	3.97843	4.50403	0.0364066	0.411715	Serinc5
0.398861	1.20785	4.5045	0.036397	0.411715	Zkscan7
0.509761	3.72747	4.48589	0.0367767	0.412664	Adra1a
-0.177751	4.06958	4.48835	0.0367263	0.412664	Gmppa
-0.288179	3.51851	4.48654	0.0367633	0.412664	Irf9
0.231256	1.42496	4.48931	0.0367066	0.412664	Jrk
0.157054	6.67435	4.4872	0.0367497	0.412664	Pum2
0.125396	4.34504	4.48977	0.0366972	0.412664	Smarcal1
0.242527	4.44024	4.49124	0.036667	0.412664	Tbc1d20
0.270076	6.79387	4.48792	0.036735	0.412664	Vps13d
0.285361	7.43127	4.47914	0.0369154	0.41308	Cxcl12
0.193889	3.37774	4.47746	0.0369499	0.41308	Dcun1d4
0.189895	9.09989	4.47978	0.0369022	0.41308	Hspg2
0.192398	3.48768	4.46953	0.0371138	0.41308	Itpr3
0.178806	3.87245	4.46888	0.0371273	0.41308	Kalrn
-0.135213	5.50003	4.46673	0.0371719	0.41308	Mta1
-0.157451	3.41681	4.4766	0.0369677	0.41308	Rars2
0.122893	4.7931	4.47447	0.0370118	0.41308	Tox4
0.244905	2.64336	4.46731	0.0371598	0.41308	Trim16
0.220486	5.79503	4.47239	0.0370547	0.41308	Usp25
0.230651	5.81052	4.46008	0.0373101	0.41372	Lrp6
0.429735	5.16104	4.46032	0.037305	0.41372	Nbeal1
-0.130583	8.37915	4.45879	0.037337	0.41372	Phyh
-0.22938	3.29566	4.45504	0.0374152	0.414025	2510002D24Rik
0.176541	8.39818	4.44547	0.0376157	0.414025	2610507B11Rik
0.153017	3.94357	4.44558	0.0376135	0.414025	Mios
0.202577	9.15021	4.44547	0.0376158	0.414025	Nrap
-0.452538	2.94957	4.44636	0.037597	0.414025	Oas2
0.181768	6.21463	4.44882	0.0375454	0.414025	Tnks2
0.155377	2.78778	4.4499	0.0375228	0.414025	Zfp212
-0.260736	0.704219	4.44091	0.0377116	0.414166	4931428F04Rik
0.33093	3.22142	4.43914	0.0377491	0.414166	Abca6
0.165336	4.55896	4.44308	0.037666	0.414166	Ipo8
0.229408	3.68594	4.43804	0.0377722	0.414166	Map3k2
-0.147544	5.97598	4.42735	0.0379986	0.414174	Hsd17b10
-0.330766	2.38362	4.42786	0.0379876	0.414174	Mall
0.490065	6.20323	4.43171	0.0379061	0.414174	Nebl
-0.199629	4.30307	4.42613	0.0380243	0.414174	Nosip
0.0980317	5.46584	4.43271	0.0378849	0.414174	Plbd2
0.15316	4.56631	4.42809	0.0379828	0.414174	Rprd1b
0.201969	6.98596	4.43457	0.0378454	0.414174	Trip12
-0.218795	1.94606	4.42202	0.0381119	0.414736	Mob3c
0.178729	3.95207	4.41508	0.03826	0.415956	Eif2s3x
0.208181	6.14636	4.41202	0.0383255	0.416276	Arhgap35
0.215053	5.99038	4.4	0.038584	0.416887	Abca2
0.417295	2.50055	4.39503	0.0386916	0.416887	Asb18
0.210215	8.01291	4.3964	0.0386619	0.416887	Cluh
0.215485	4.51503	4.38837	0.038836	0.416887	Frmd4a
-0.110598	4.47087	4.39225	0.0387518	0.416887	Gstz1
-0.328451	6.19417	4.38765	0.0388516	0.416887	Hcfc1r1
0.259943	4.26	4.39874	0.0386112	0.416887	Hes1
-0.245163	4.99243	4.40313	0.0385166	0.416887	Mrps21
-0.167032	4.964	4.40558	0.0384639	0.416887	Nsfl1c
0.154204	4.08307	4.39369	0.0387206	0.416887	Nup188
-0.0939867	4.33802	4.38868	0.0388293	0.416887	Timm21
0.167252	3.3954	4.40223	0.0385359	0.416887	Trim32
-0.17043	2.60901	4.39322	0.0387308	0.416887	Zfp513
-0.176601	4.52269	4.38529	0.0389031	0.417051	Isca2
-0.367998	0.319844	4.38285	0.0389563	0.417234	Bean1
0.32329	3.19613	4.37712	0.0390813	0.417703	1500017E21Rik
0.130706	5.1605	4.34312	0.039833	0.417703	Agap1
-0.215821	2.31322	4.34835	0.0397165	0.417703	Bcl2l12
0.153788	3.66326	4.37321	0.039167	0.417703	Ccdc71l
0.254446	5.92148	4.34983	0.0396834	0.417703	Cpeb3
0.311575	3.96769	4.34972	0.039686	0.417703	Elk4
-0.174207	4.76899	4.35818	0.0394982	0.417703	Gadd45gip1
-0.258721	3.01262	4.36001	0.0394577	0.417703	Ggct
0.180081	4.85377	4.36243	0.0394043	0.417703	Itpr1
0.150668	4.69345	4.35289	0.0396155	0.417703	Man1a2
-0.138607	5.32323	4.34482	0.0397951	0.417703	Mrpl50
0.367732	2.0907	4.36045	0.0394481	0.417703	Ndnf
-0.14452	3.28898	4.3576	0.0395112	0.417703	Obfc1
0.1636	4.78211	4.37109	0.0392137	0.417703	P2ry2
0.133712	5.49355	4.34315	0.0398325	0.417703	Phf2
-0.25106	2.1673	4.35245	0.0396252	0.417703	Prss36
0.212444	4.09904	4.34325	0.0398301	0.417703	Rgs12
-0.314526	1.87771	4.34841	0.0397152	0.417703	Taf1d
0.102211	5.66713	4.35903	0.0394794	0.417703	Tnpo3
0.219085	4.55331	4.34771	0.0397308	0.417703	Traf3
0.184448	4.28239	4.35699	0.0395246	0.417703	Usp40
0.167161	4.35129	4.34814	0.0397211	0.417703	Zdhhc3
-0.182457	3.66695	4.34341	0.0398265	0.417703	Zfp691
-0.194486	2.49848	4.32911	0.0401473	0.420001	3110040N11Rik
0.201612	3.25767	4.32885	0.040153	0.420001	Acsl4
0.258423	6.02213	4.32848	0.0401614	0.420001	Birc6
-0.167529	4.89107	4.31926	0.0403698	0.420045	Banf1
0.169735	3.74579	4.32594	0.0402188	0.420045	Ccbl2
0.190004	1.93879	4.31542	0.0404568	0.420045	Cdca4
0.168374	4.04611	4.31735	0.0404131	0.420045	Cldn12
0.141571	6.5076	4.31554	0.0404542	0.420045	Kank2
0.183454	2.57164	4.32165	0.0403156	0.420045	Lsm11
-0.218617	3.75641	4.31935	0.0403676	0.420045	Mrps36
0.123845	3.08764	4.322	0.0403078	0.420045	Orc2
-0.120965	4.63565	4.31197	0.0405352	0.420246	BC003965
-0.260061	3.75065	4.30976	0.0405855	0.420246	Samd9l
0.105215	5.85115	4.31005	0.040579	0.420246	Tbc1d9b
0.35808	5.01942	4.30705	0.0406475	0.42051	Cpeb2
0.415995	3.29926	4.2958	0.0409051	0.422796	Hook1
-0.158481	3.37878	4.2919	0.0409948	0.423344	Rnmtl1
-0.307143	0.867101	4.27515	0.0413823	0.423415	9830147E19Rik
0.170385	5.769	4.28332	0.0411929	0.423415	Atp2b1
0.193137	6.20778	4.28663	0.0411163	0.423415	Bcl2l13
-0.241756	5.39107	4.27323	0.0414272	0.423415	Hand2
0.49349	2.76829	4.28456	0.0411641	0.423415	Hcn4
-0.152439	2.51547	4.28326	0.0411942	0.423415	Iqcc
0.16069	4.96563	4.27328	0.041426	0.423415	Kdm5a
-0.144736	5.88191	4.27739	0.0413302	0.423415	Lgmn
0.109069	3.79083	4.27325	0.0414267	0.423415	Napg
0.209629	8.1663	4.28218	0.0412191	0.423415	Perm1
-0.278602	6.69033	4.27258	0.0414422	0.423415	Ptms
0.171413	2.64683	4.27837	0.0413076	0.423415	Tbc1d12
0.205508	4.98365	4.26406	0.0416412	0.424919	Cep104
0.172065	5.73827	4.26312	0.0416631	0.424919	Ptprg
-0.11854	5.98618	4.25168	0.0419323	0.425213	Cops7a
0.655769	1.47595	4.25652	0.0418181	0.425213	Erbb4
0.167375	3.20019	4.24781	0.0420236	0.425213	Klhl2
0.318202	1.35432	4.25873	0.0417663	0.425213	Nhlrc3
0.236244	10.5993	4.25103	0.0419474	0.425213	Pde4dip
0.17406	3.49171	4.24929	0.0419887	0.425213	Polr3a
0.20712	6.38757	4.25202	0.0419243	0.425213	Ptprm
0.142383	5.06906	4.24929	0.0419885	0.425213	Smurf1
0.144516	3.86494	4.25709	0.0418048	0.425213	Uvrag
-0.294776	2.1757	4.24425	0.042108	0.425693	Rrnad1
0.180896	2.15716	4.24122	0.0421798	0.426046	Zfp780b
-0.196916	3.7836	4.23739	0.0422708	0.426359	Agpat9
-0.177542	3.94531	4.2368	0.0422848	0.426359	Ppil1
-0.187273	2.57403	4.22817	0.0424907	0.426571	1110051M20Rik
0.641751	3.52211	4.2297	0.0424542	0.426571	Cntn2
0.332967	3.96043	4.23303	0.0423747	0.426571	Hecw2
0.315747	8.22301	4.23024	0.0424414	0.426571	Slc8a1
-0.210549	6.58495	4.23004	0.042446	0.426571	Uba52
0.384351	0.828735	4.2229	0.042617	0.427467	Lancl3
0.348825	2.98617	4.21859	0.0427208	0.428135	Arl5b
-0.193352	4.07406	4.21326	0.0428491	0.428676	Gmnn
0.207168	2.6399	4.21395	0.0428325	0.428676	Lpin2
-0.162854	3.67706	4.19631	0.0432605	0.428871	2610507I01Rik
0.171163	3.44168	4.20069	0.0431539	0.428871	AI464131
0.155061	4.1137	4.20783	0.0429805	0.428871	Ankrd13c
-0.230856	4.29503	4.19442	0.0433067	0.428871	C130074G19Rik
0.13555	2.93045	4.2029	0.0431	0.428871	Ddx51
-0.128387	6.90044	4.20203	0.0431212	0.428871	Hnrnpab
-0.133739	2.33371	4.20985	0.0429315	0.428871	Mettl6
-0.213868	0.895898	4.19385	0.0433206	0.428871	Nme7
-0.138364	3.53445	4.19428	0.04331	0.428871	Pold2
-0.186346	4.10928	4.19257	0.0433518	0.428871	Rab24
-0.122564	3.85455	4.20665	0.0430092	0.428871	Smpd4
-0.141434	3.93852	4.19481	0.0432972	0.428871	Txndc12
0.242363	0.647354	4.20077	0.0431519	0.428871	Zfp791
0.374336	5.32088	4.1876	0.0434736	0.429339	Dmxl1
0.183432	2.80545	4.1879	0.0434663	0.429339	Tubgcp5
0.136126	4.57982	4.18053	0.0436472	0.429949	Ankfy1
0.136796	6.22582	4.18176	0.043617	0.429949	Ppap2b
0.155722	4.48065	4.18177	0.0436167	0.429949	Slc44a1
0.174799	6.96201	4.17689	0.0437369	0.430465	Mtus2
0.339899	2.67211	4.17305	0.0438318	0.430562	Fam65b
0.253196	3.14412	4.17003	0.0439067	0.430562	Fzd1
0.247235	2.74391	4.16895	0.0439334	0.430562	Sprtn
0.166293	6.63873	4.17175	0.0438641	0.430562	Susd6
-0.184466	2.78539	4.17008	0.0439054	0.430562	Tfpt
-0.137351	4.38194	4.16736	0.0439729	0.430583	Zfp358
0.320074	0.736664	4.15855	0.0441922	0.431118	Alcam
0.326927	1.96695	4.14916	0.044427	0.431118	Alkbh8
0.361439	4.86403	4.15742	0.0442204	0.431118	Arhgap20
0.133649	4.36032	4.14958	0.0444167	0.431118	Atmin
0.269208	3.98046	4.15701	0.0442307	0.431118	Bahcc1
-0.179796	4.3484	4.15725	0.0442246	0.431118	Ctnnbip1
0.20818	7.83555	4.14573	0.0445134	0.431118	Fhod3
0.191324	7.24602	4.14911	0.0444283	0.431118	Mgrn1
-0.165246	2.46366	4.15365	0.0443146	0.431118	Orc5
0.278992	6.09996	4.15246	0.0443444	0.431118	Ranbp2
0.554421	0.928068	4.1462	0.0445015	0.431118	Slc24a2
0.3137	0.913967	4.14743	0.0444705	0.431118	Zfp503
-0.140281	2.77975	4.14918	0.0444265	0.431118	Zfpl1
0.281947	6.01881	4.14237	0.0445979	0.431302	Ash1l
0.278493	3.81292	4.142	0.0446072	0.431302	Cdc73
0.165659	5.08679	4.09001	0.0459385	0.431998	1190002N15Rik
-0.256386	2.91352	4.09318	0.045856	0.431998	9330158H04Rik
0.176392	5.76686	4.08816	0.0459867	0.431998	Ap1b1
-0.259388	2.78982	4.1181	0.0452141	0.431998	Ddit3
-0.192063	3.45371	4.12947	0.0449242	0.431998	Dgka
-0.207078	1.12347	4.12151	0.0451268	0.431998	E2f5
-0.402996	2.60374	4.11954	0.0451771	0.431998	Efemp1
0.179095	3.17538	4.113	0.0453446	0.431998	Ero1l
0.211143	4.36168	4.1179	0.0452192	0.431998	Fam178a
-0.300536	3.62257	4.10005	0.045678	0.431998	Fgf16
0.304008	6.51443	4.11979	0.0451709	0.431998	Fitm2
0.383628	3.70508	4.11913	0.0451876	0.431998	Frem2
0.191775	5.36239	4.11289	0.0453474	0.431998	Gbe1
-0.14889	7.52871	4.08657	0.046028	0.431998	Gnai2
0.136393	6.39497	4.12555	0.0450238	0.431998	Iars2
0.144704	6.24569	4.08773	0.0459978	0.431998	Kat2b
-0.156104	4.83943	4.08606	0.0460415	0.431998	Mmab
0.136614	6.78905	4.12578	0.0450181	0.431998	Nomo1
0.176375	5.55163	4.12093	0.0451416	0.431998	Notch1
-0.271309	4.49508	4.12207	0.0451125	0.431998	Nrep
0.155032	5.86072	4.12255	0.0451003	0.431998	Nudcd3
-0.483182	3.25488	4.11195	0.0453716	0.431998	Oasl2
0.565346	1.11189	4.09932	0.0456969	0.431998	Pakap
-0.0966088	3.85757	4.0884	0.0459803	0.431998	Plrg1
-0.137488	4.25032	4.08812	0.0459878	0.431998	Pmm2
0.123813	3.30092	4.11441	0.0453085	0.431998	Polr3f
0.138865	5.05742	4.09367	0.0458433	0.431998	Ppp2r5e
-0.178374	4.94289	4.12019	0.0451605	0.431998	Rbm5
0.183092	2.33484	4.08373	0.0461023	0.431998	Rft1
-0.228082	2.00116	4.08909	0.0459625	0.431998	Rpa3
0.151771	3.30029	4.09938	0.0456953	0.431998	Siah1a
0.191305	4.5771	4.08375	0.0461016	0.431998	Slc43a2
0.164092	4.27033	4.09337	0.0458511	0.431998	Synj1
-0.206623	1.55113	4.10241	0.0456172	0.431998	Tmem39b
0.313745	4.07482	4.11564	0.0452769	0.431998	Trf
-0.180291	4.12709	4.08538	0.0460592	0.431998	Tubg1
-0.219937	1.52649	4.09194	0.0458884	0.431998	Zcchc10
0.133879	4.05846	4.11038	0.0454118	0.431998	Zfp646
0.336724	3.01127	4.08076	0.0461798	0.432022	Erbb3
-0.154392	2.95773	4.08157	0.0461587	0.432022	Ggact
0.161368	5.59243	4.07017	0.0464578	0.432258	B230219D22Rik
0.206923	2.2218	4.07623	0.0462983	0.432258	Cdkl2
-0.134021	2.87689	4.07111	0.0464331	0.432258	Cdkn2aipnl
0.16804	2.83546	4.07787	0.0462555	0.432258	Cep76
0.271556	4.40442	4.06981	0.0464672	0.432258	Cmtm4
0.299114	4.40007	4.07	0.0464621	0.432258	Mrs2
-0.304538	4.85345	4.07211	0.0464067	0.432258	Rnf207
0.148516	4.81661	4.06832	0.0465065	0.432274	Fbxl20
0.252917	5.08617	4.06178	0.0466792	0.432429	Dsc2
0.193576	3.01934	4.062	0.0466732	0.432429	Ldoc1l
0.153939	4.32043	4.06059	0.0467106	0.432429	Lig3
0.128994	4.3104	4.0617	0.0466812	0.432429	Morc2a
0.263938	3.41704	4.06106	0.0466982	0.432429	Ppm1e
-0.153612	3.39634	4.05525	0.0468522	0.433392	2210016L21Rik
0.179045	1.54025	4.05005	0.0469907	0.433403	Dzip1l
-0.20944	2.79469	4.05332	0.0469036	0.433403	Nans
0.129772	5.21349	4.04956	0.0470037	0.433403	Sun1
0.170143	1.85704	4.05136	0.0469557	0.433403	Unkl
0.389952	1.65225	4.04718	0.0470672	0.433474	Pdzd3
0.26094	4.40453	4.04646	0.0470865	0.433474	Rprd1a
-0.206123	4.47321	4.03703	0.047339	0.433631	Cisd3
0.321448	3.82231	4.04006	0.0472578	0.433631	Cux2
-0.378224	2.81608	4.03274	0.0474544	0.433631	Mest
0.169278	3.30462	4.04325	0.0471722	0.433631	Sdad1
0.225328	4.524	4.04123	0.0472264	0.433631	Sema4d
-0.139357	5.38219	4.03249	0.0474613	0.433631	Slmo2
0.179913	4.2093	4.03181	0.0474795	0.433631	Tab1
0.308569	0.761544	4.03391	0.0474228	0.433631	Ttll11
-0.174527	4.17132	4.03458	0.047405	0.433631	Wdr83
0.412491	2.37428	4.04238	0.0471954	0.433631	Xpo4
0.286729	1.03217	4.03032	0.0475196	0.433654	Adamtsl1
0.192714	3.57396	4.02869	0.0475637	0.433714	Rlf
0.24346	5.93494	4.02697	0.0476101	0.433793	Larp4b
-0.192502	6.09134	3.98161	0.0488533	0.433957	2310061I04Rik
0.176785	4.49	3.99724	0.048421	0.433957	Abcb4
0.231047	2.30637	3.99525	0.0484757	0.433957	Abcd2
0.486077	1.71309	4.02491	0.0476658	0.433957	Adnp
-0.188597	2.81164	3.9853	0.0487508	0.433957	Ak6
-0.20382	2.24015	3.95083	0.0497166	0.433957	Ankrd24
0.256163	3.88554	4.01221	0.0480108	0.433957	Asb1
0.30189	4.21847	3.96473	0.0493246	0.433957	Cacna1g
0.255343	6.11021	3.97924	0.0489191	0.433957	Col6a3
-0.122873	5.13158	3.98993	0.0486226	0.433957	Commd3
0.258305	6.24081	3.97668	0.0489903	0.433957	Daam1
-0.096036	4.87395	3.95183	0.0496882	0.433957	Dnajc14
0.143302	6.61302	3.96303	0.0493723	0.433957	Glud1
0.239496	8.54425	3.96418	0.0493401	0.433957	Golga4
-0.138247	2.93455	3.9944	0.0484992	0.433957	Hdac1
0.231794	1.23802	4.0087	0.0481065	0.433957	Hgh1
0.211466	6.28601	4.00193	0.0482921	0.433957	Hipk1
0.58235	5.49273	3.97324	0.0490864	0.433957	Hipk2
0.216811	1.77821	4.01162	0.0480268	0.433957	Homez
0.182052	4.80902	4.01867	0.047835	0.433957	Irgq
0.24726	5.5168	3.95013	0.0497362	0.433957	Kif16b
0.26083	2.71627	3.97945	0.0489133	0.433957	Lamc2
-0.319293	2.27701	3.97234	0.0491115	0.433957	Lhx6
-0.342413	6.15082	4.0111	0.0480411	0.433957	Ly6e
-0.268692	1.85971	3.94998	0.0497407	0.433957	Med31
-0.19037	4.44109	3.94753	0.04981	0.433957	Mrps5
-0.230386	5.65449	3.97672	0.0489894	0.433957	Myl6
0.215795	7.1862	3.96374	0.0493523	0.433957	Mypn
0.127375	5.08976	4.00415	0.0482311	0.433957	Ncoa3
-0.114738	4.07829	3.98697	0.0487045	0.433957	Ndufaf7
0.214574	4.62603	3.97668	0.0489904	0.433957	Nedd1
-0.360761	1.76604	4.01215	0.0480125	0.433957	Neurl3
0.18366	3.76508	3.95653	0.0495555	0.433957	Pcolce2
0.362833	1.0012	4.00596	0.0481817	0.433957	Pdgfc
-0.127008	6.90852	3.98395	0.0487883	0.433957	Phb2
0.240967	3.76279	3.98913	0.0486447	0.433957	Pou2f1
-0.163417	3.86621	3.99009	0.0486182	0.433957	Ppp1r18
0.149255	3.25275	3.95594	0.0495719	0.433957	Rcbtb1
-0.215841	4.47882	3.95339	0.0496442	0.433957	Safb2
0.115787	5.41601	3.94844	0.0497843	0.433957	Sf3b3
0.247349	3.35547	3.99558	0.0484666	0.433957	Shprh
0.209076	4.30898	3.96337	0.0493629	0.433957	Smchd1
0.119706	3.46384	3.99398	0.0485108	0.433957	Sptlc1
0.145919	4.83304	3.99049	0.0486072	0.433957	St3gal2
0.16585	4.00051	3.94868	0.0497775	0.433957	Stim1
0.181437	4.06181	4.01771	0.047861	0.433957	Stk4
0.138895	4.29335	3.98557	0.0487434	0.433957	Tapt1
0.157264	6.79304	3.96811	0.0492299	0.433957	Tm9sf2
0.261707	3.04674	3.95611	0.0495672	0.433957	Tmc7
0.262163	5.28678	3.96504	0.049316	0.433957	Tnfaip2
0.211991	3.88129	3.97744	0.0489691	0.433957	Ttbk2
0.155333	2.47394	3.97747	0.0489685	0.433957	Ubox5
-0.118277	3.76969	3.96562	0.0492996	0.433957	Usp21
0.12474	4.4425	4.01254	0.0480019	0.433957	Vps37a
0.308173	2.72314	3.97793	0.0489556	0.433957	Zc3h12c
-0.180976	2.29856	3.96459	0.0493285	0.433957	Zfp524
0.166448	2.26248	3.97873	0.0489331	0.433957	Zfp626
-0.210058	3.00514	3.96071	0.0494375	0.433957	Zmat5
0.259691	3.05732	3.94483	0.0498866	0.433968	Epm2a
-0.126618	3.05299	3.94558	0.0498655	0.433968	Ubxn8
-0.119028	5.96414	3.94135	0.0499856	0.434502	Sgta
0.252047	2.32395	3.93753	0.0500946	0.434785	Nipa1
-0.237071	1.07248	3.93625	0.0501313	0.434785	Tmie
0.245269	2.08929	3.93884	0.0500573	0.434785	Ybey
-0.168616	4.19507	3.93289	0.0502273	0.435229	Gstm5
0.131344	3.55003	3.93182	0.0502579	0.435229	Natd1
0.173246	4.40401	3.92971	0.0503183	0.435425	Agfg1
0.19031	5.48135	3.92601	0.0504247	0.436019	Lifr
-0.241172	1.83902	3.91386	0.0507751	0.437409	Gm6548
-0.117824	2.98658	3.91454	0.0507556	0.437409	Mettl3
-0.161246	7.12257	3.91764	0.0506657	0.437409	Ndufs8
0.143398	4.56094	3.91472	0.0507504	0.437409	Suv420h1
0.138239	5.10887	3.91446	0.0507577	0.437409	Wls
0.244238	5.80121	3.9096	0.0508989	0.438148	Hcfc1
0.137159	6.64785	3.90719	0.0509688	0.438148	Narf
0.134587	6.06969	3.90698	0.0509748	0.438148	Yap1
-0.218096	1.95017	3.90515	0.0510283	0.438281	Tmem219
0.160855	3.91589	3.90172	0.0511282	0.438812	Parg
0.227897	2.45931	3.89794	0.0512386	0.439433	Napepld
0.532033	2.56782	3.89571	0.0513037	0.439664	Lmbrd2
0.118534	4.36334	3.89388	0.0513575	0.439798	Brox
0.265283	2.74228	3.89069	0.051451	0.440145	Col4a3
-0.275731	1.23592	3.8899	0.0514742	0.440145	Faim
-0.158873	4.09246	3.88571	0.0515976	0.440468	Aida
0.203553	4.12608	3.88473	0.0516266	0.440468	2021-03-07
0.160176	3.37234	3.88718	0.0515542	0.440468	Zswim4
-0.188962	3.50014	3.88289	0.0516808	0.440605	1110008P14Rik
0.324449	0.767087	3.87961	0.0517775	0.441103	Tmem74b
0.243913	4.95134	3.87192	0.0520058	0.442721	F13a1
0.171925	3.73576	3.86951	0.0520772	0.443002	Hacd3
0.0999899	4.87236	3.86807	0.0521203	0.443042	Naa35
0.210096	5.8687	3.86662	0.0521634	0.443082	Mtor
-0.228725	5.71299	3.8572	0.052445	0.443277	Ablim3
0.309793	1.14764	3.85891	0.052394	0.443277	Ap5b1
-0.146055	5.55639	3.85428	0.0525328	0.443277	Clybl
-0.107452	7.39136	3.85637	0.0524699	0.443277	Epn1
-0.120455	4.76656	3.85978	0.0523679	0.443277	Ergic3
0.135706	5.99168	3.86398	0.0522422	0.443277	Gpr146
0.164313	5.23373	3.85302	0.0525706	0.443277	Pdgfra
0.218846	8.03265	3.85429	0.0525323	0.443277	Psme4
0.289551	3.2115	3.85422	0.0525345	0.443277	Rcor1
0.341497	5.71688	3.85649	0.0524663	0.443277	Rreb1
0.730052	1.63255	3.85163	0.0526123	0.443304	Angptl7
0.171025	3.00221	3.84456	0.0528255	0.443338	Asb7
-0.156093	3.36857	3.84738	0.0527406	0.443338	Dguok
-0.278833	1.60831	3.84779	0.0527279	0.443338	Glipr2
-0.230961	5.03971	3.84484	0.052817	0.443338	Ifitm2
-0.152524	3.30322	3.84386	0.0528469	0.443338	Sigmar1
0.207963	3.40751	3.84439	0.0528309	0.443338	Ston1
-0.190591	4.24446	3.8415	0.0529181	0.443612	Prelid1
0.222146	5.57207	3.83027	0.0532594	0.444027	Gab1
0.173377	4.41124	3.83412	0.0531421	0.444027	Mthfd1
-0.29321	0.258223	3.82974	0.0532755	0.444027	Nthl1
-0.1117	5.66214	3.83114	0.0532328	0.444027	Raly
0.166437	3.24977	3.83124	0.0532299	0.444027	Rcan3
0.30616	1.10524	3.8351	0.0531123	0.444027	Smad9
0.0926758	4.5016	3.83446	0.0531318	0.444027	Uba2
0.441543	1.74415	3.83319	0.0531703	0.444027	Zfp369
-0.237875	1.93825	3.82797	0.0533296	0.444157	Tspan6
-0.117007	3.98478	3.82557	0.053403	0.444224	Kat2a
-0.21084	2.1229	3.82485	0.053425	0.444224	Snx16
0.189389	3.7538	3.82393	0.0534532	0.444224	Tbck
-0.286477	0.450857	3.81105	0.053849	0.445123	1700088E04Rik
0.260942	3.50105	3.81729	0.0536566	0.445123	Acvr1b
-0.176755	2.93932	3.81598	0.0536969	0.445123	Cep131
-0.132252	5.2632	3.81089	0.0538538	0.445123	Mrpl39
0.240385	4.3932	3.81434	0.0537475	0.445123	Pcdhgc3
-0.291793	2.44626	3.81242	0.0538067	0.445123	Pf4
0.23839	6.96436	3.81435	0.053747	0.445123	Plin4
0.102375	5.77063	3.81036	0.0538701	0.445123	Tacc1
-0.254866	2.49338	3.80858	0.053925	0.445258	Casp8
-0.286837	3.04293	3.80703	0.0539729	0.445334	Cmpk2
-0.206006	3.76479	3.80561	0.0540169	0.445379	Yaf2
0.223662	4.16449	3.80307	0.0540956	0.445559	Kdm6a
0.233454	1.76149	3.80242	0.054116	0.445559	P3h2
0.352998	1.35534	3.79951	0.0542062	0.445665	Ptar1
-0.237666	3.3341	3.80001	0.0541906	0.445665	Snapc5
0.220658	5.17062	3.79692	0.0542867	0.446009	Intu
0.157776	5.17827	3.79226	0.0544318	0.446248	Slc12a6
0.187151	2.26426	3.79446	0.0543635	0.446248	Tctn3
-0.118441	4.99391	3.79281	0.0544147	0.446248	Tpd52l2
0.163451	10.2454	3.78654	0.0546109	0.447194	Myom1
0.192445	5.79132	3.7861	0.0546247	0.447194	Tnrc18
0.232042	4.67145	3.78291	0.0547245	0.447693	Hivep2
-0.141139	2.78651	3.77943	0.0548339	0.44808	1110038F14Rik
0.153113	5.99255	3.77894	0.0548495	0.44808	Rtn4
-0.164633	6.48069	3.77422	0.0549981	0.448271	Cox7a2l
-0.295341	0.970683	3.77594	0.0549439	0.448271	Ddb2
0.105442	5.90457	3.77441	0.0549921	0.448271	E2f6
0.154512	6.89717	3.77326	0.0550284	0.448271	Wdr26
-0.139848	4.75898	3.7656	0.055271	0.448398	Bcap31
-0.27308	3.91921	3.75981	0.055455	0.448398	Gal3st3
-0.198041	4.66684	3.75966	0.0554597	0.448398	Hemk1
0.144374	5.0757	3.77107	0.0550976	0.448398	Kdm4a
-0.303966	1.24581	3.7613	0.0554076	0.448398	Mad2l1
0.320187	1.8729	3.76633	0.0552478	0.448398	Mfsd12
0.222323	1.5918	3.76991	0.0551344	0.448398	Pard6g
0.0792674	4.34461	3.76655	0.055241	0.448398	Seh1l
-0.159115	3.06912	3.76467	0.0553006	0.448398	Snx15
0.194751	2.66322	3.75929	0.0554715	0.448398	Tcaf1
-0.205212	4.24839	3.76192	0.0553878	0.448398	Txndc17
-0.111431	4.64855	3.74965	0.0557796	0.449314	Adi1
0.162954	3.53522	3.75149	0.0557208	0.449314	Farp2
-0.197752	6.13674	3.75208	0.0557017	0.449314	Sepw1
0.14845	3.73359	3.74979	0.0557753	0.449314	Spry2
-0.198676	4.01967	3.7501	0.0557651	0.449314	Uqcc3
-0.193764	2.52087	3.74298	0.0559937	0.449344	Dpm2
-0.179985	4.90121	3.74431	0.0559511	0.449344	H2-Ke6
0.142493	5.91344	3.74112	0.0560537	0.449344	Nsd1
-0.169711	4.68497	3.74778	0.0558397	0.449344	Pdlim7
-0.123364	3.81247	3.74105	0.0560561	0.449344	Phf23
-0.161214	4.90128	3.74417	0.0559554	0.449344	Syf2
0.278403	2.41205	3.74202	0.0560248	0.449344	Tenm3
0.12661	7.09594	3.73703	0.0561856	0.45007	Rassf3
0.278058	8.36317	3.73258	0.0563296	0.450352	Acacb
0.2649	1.30765	3.72991	0.056416	0.450352	Kbtbd11
0.209737	3.83433	3.73073	0.0563895	0.450352	Usp31
0.184623	2.39307	3.73182	0.056354	0.450352	Zbtb5
0.173491	2.62812	3.73247	0.0563331	0.450352	Zfp867
-0.120556	3.75703	3.72534	0.0565645	0.451225	Fam104a
0.230818	2.04236	3.72362	0.0566206	0.451361	Smyd4
-0.135646	7.66164	3.72102	0.0567053	0.451723	Cd81
-0.130076	2.79506	3.71546	0.0568868	0.452131	Cdc26
-0.289122	5.43271	3.71466	0.0569132	0.452131	Ptma
0.199768	6.38301	3.71739	0.0568237	0.452131	Scarb2
-0.177182	3.5397	3.71665	0.0568481	0.452131	Sf3b6
0.100149	5.62949	3.70613	0.0571932	0.452295	Cul1
0.276014	2.88292	3.70889	0.0571023	0.452295	Cyp2u1
0.29978	3.33936	3.71019	0.0570597	0.452295	E230013L22Rik
0.151768	4.08723	3.70448	0.0572476	0.452295	Flywch1
0.349102	0.850788	3.70488	0.0572345	0.452295	Ikzf1
-0.315048	4.32272	3.71113	0.0570288	0.452295	Rsad2
0.329668	3.22943	3.70756	0.0571462	0.452295	Spock2
-0.173964	2.06969	3.70795	0.0571333	0.452295	Txnl4b
0.161438	2.82526	3.68324	0.0579522	0.452338	2410089E03Rik
0.14612	3.64418	3.68197	0.0579947	0.452338	Akap10
0.310027	1.1944	3.69634	0.0575166	0.452338	Akap2
0.210695	7.12296	3.67959	0.0580742	0.452338	Aldh6a1
0.113246	4.33062	3.66581	0.0585374	0.452338	Ambra1
0.152131	5.82819	3.64612	0.0592061	0.452338	Ap2a2
0.241099	2.014	3.69422	0.0575868	0.452338	Axin2
-0.173708	2.01584	3.65653	0.0588516	0.452338	Cacna1a
-0.199142	2.28465	3.63553	0.0595695	0.452338	Ccdc61
-0.342121	1.50985	3.68258	0.0579743	0.452338	Cldn15
-0.153017	4.98263	3.6186	0.0601549	0.452338	Clpp
0.19342	3.12289	3.61984	0.0601117	0.452338	Crebl2
0.143733	3.34489	3.67093	0.0583648	0.452338	Dlg5
-0.0989672	8.79803	3.68753	0.0578092	0.452338	Dmpk
0.295969	8.95493	3.62253	0.0600184	0.452338	Dst
0.194902	2.36886	3.63641	0.059539	0.452338	Enpp1
-0.259148	1.62442	3.65678	0.0588433	0.452338	Eps8l2
0.145607	3.84883	3.6369	0.0595224	0.452338	Exoc2
-0.287976	1.78462	3.6284	0.0598152	0.452338	Exoc3l
0.171352	3.62827	3.68082	0.0580331	0.452338	Fam179b
-0.291953	0.702546	3.66093	0.0587025	0.452338	Fancg
0.135982	4.37217	3.64719	0.0591698	0.452338	Fem1b
-0.191243	9.69077	3.66017	0.0587282	0.452338	Gapdh
0.224515	5.36808	3.62935	0.0597826	0.452338	Gm15800
0.179636	5.61982	3.65838	0.0587888	0.452338	Golga3
-0.14689	6.10581	3.67794	0.0581295	0.452338	Gsk3a
0.12181	7.32889	3.67938	0.0580812	0.452338	Gtf2i
-0.319222	1.83719	3.67867	0.0581049	0.452338	Herc6
-0.244787	4.62814	3.65034	0.0590623	0.452338	Hnrnph3
-0.158678	6.41426	3.62027	0.060097	0.452338	Hnrnpl
-0.101916	4.10319	3.62288	0.0600063	0.452338	Ilf2
0.154861	4.64235	3.62805	0.0598275	0.452338	Itch
0.165372	3.53733	3.6411	0.0593782	0.452338	Jmjd4
0.190755	4.67637	3.64465	0.0592565	0.452338	Kdm7a
-0.13261	4.59503	3.64067	0.059393	0.452338	Mepce
-0.241549	7.69536	3.68568	0.0578709	0.452338	Mgll
0.171598	5.9941	3.6793	0.058084	0.452338	Micall1
0.20753	5.59521	3.61967	0.0601177	0.452338	Mlxip
-0.239253	7.05642	3.70129	0.057353	0.452338	Mrpl42
0.37171	0.925049	3.62658	0.0598782	0.452338	Mum1l1
-0.147751	6.368	3.67741	0.0581473	0.452338	Pacsin3
0.238382	9.05109	3.63053	0.0597418	0.452338	Pam
-0.179165	8.45712	3.64631	0.0591997	0.452338	Pgam2
0.233236	6.09974	3.6638	0.0586054	0.452338	Pkd1
-0.10788	3.22724	3.67352	0.0582778	0.452338	Pla2g6
0.151913	6.47987	3.67671	0.0581708	0.452338	Pnpla8
-0.124935	2.81605	3.63304	0.0596553	0.452338	Ptrh2
-0.109646	3.72696	3.63183	0.059697	0.452338	Rsl24d1
0.390503	2.3888	3.61913	0.0601365	0.452338	Sesn3
0.167118	4.2128	3.67949	0.0580776	0.452338	Slc11a2
0.206751	3.44581	3.68763	0.0578059	0.452338	Slc25a15
0.231588	2.35344	3.65573	0.058879	0.452338	Slc2a12
0.219072	3.92012	3.62458	0.0599476	0.452338	Slc45a4
-0.364554	0.488927	3.65395	0.0589394	0.452338	Slc9a5
0.132498	4.95005	3.66918	0.058424	0.452338	Smim13
-0.212767	5.73987	3.63558	0.0595676	0.452338	Snrnp70
0.242016	4.9704	3.66564	0.0585434	0.452338	Sort1
0.175539	4.37685	3.64178	0.0593547	0.452338	Suz12
0.135565	5.014	3.64366	0.0592905	0.452338	Tatdn2
0.142921	3.93456	3.61891	0.0601442	0.452338	Tbc1d2b
0.362441	2.79906	3.6676	0.0584771	0.452338	Tet1
0.18786	4.66874	3.6318	0.059698	0.452338	Tet3
0.187167	2.96107	3.62836	0.0598166	0.452338	Thada
0.240413	2.79188	3.63785	0.0594897	0.452338	Thsd7a
-0.182583	1.98293	3.63002	0.0597594	0.452338	Tmem179b
-0.461348	4.08864	3.69957	0.0574096	0.452338	Tmem82
0.166062	5.98673	3.665	0.0585648	0.452338	Tomm70a
0.194669	2.154	3.65929	0.058758	0.452338	Trim65
0.185717	5.24587	3.65575	0.0588782	0.452338	Trpm7
0.289991	7.30051	3.62604	0.0598969	0.452338	Ubr3
-0.239576	1.44993	3.62622	0.0598905	0.452338	Unc5a
-0.180162	3.68556	3.63954	0.0594317	0.452338	Urm1
-0.234436	5.4484	3.6687	0.0584399	0.452338	Vps25
-0.146325	2.41755	3.67267	0.0583065	0.452338	Zfyve19
0.20357	6.48383	3.60986	0.0604598	0.454185	Prkar2a
-0.127598	5.95947	3.6093	0.0604792	0.454185	Trip10
-0.285817	7.96306	3.60727	0.0605502	0.454422	S100a1
0.257065	5.1369	3.60586	0.0605996	0.454497	Impad1
0.335541	2.60144	3.60305	0.0606984	0.454615	Adgre1
-0.134404	4.54329	3.59672	0.0609209	0.454615	Apoa1bp
0.141677	4.44968	3.60083	0.0607764	0.454615	Aqr
0.120117	6.35016	3.59823	0.0608678	0.454615	Atp6v0a1
-0.183648	3.89325	3.59524	0.0609733	0.454615	Gltp
-0.227786	2.44896	3.59421	0.0610095	0.454615	Ldb2
-0.21023	3.58592	3.595	0.0609817	0.454615	Rom1
0.205673	5.21697	3.59499	0.060982	0.454615	Sec23a
-0.135232	7.60194	3.59535	0.0609691	0.454615	Vegfb
-0.129574	4.17944	3.59697	0.0609122	0.454615	Zfp622
-0.199629	5.43321	3.593	0.0610521	0.454639	Tceb2
0.188543	4.89048	3.586	0.0613001	0.454879	Exoc4
0.155004	3.87257	3.5898	0.0611654	0.454879	Rbpj
0.15747	6.64805	3.58541	0.0613209	0.454879	Srf
-0.3062	1.60222	3.59021	0.0611509	0.454879	Terf1
0.169625	5.0121	3.58652	0.0612815	0.454879	Trappc8
0.116652	4.42569	3.58814	0.0612242	0.454879	Zzz3
0.229464	5.7788	3.58377	0.0613792	0.455019	Klf13
-0.0920325	5.68831	3.58261	0.0614206	0.455033	Mrpl37
0.195807	4.72217	3.57931	0.0615379	0.45537	Frmd6
0.235706	4.92148	3.57835	0.061572	0.45537	Gpt2
0.18335	4.73337	3.57801	0.0615844	0.45537	Nfatc3
0.203557	7.40396	3.57457	0.061707	0.455793	Adcy6
0.189446	2.4515	3.57419	0.0617207	0.455793	Boc
0.229938	2.15552	3.56922	0.0618988	0.455932	Gm16576
0.223523	6.8001	3.56814	0.0619372	0.455932	Ntn1
0.147102	2.00776	3.56925	0.0618977	0.455932	Rnf138
-0.218284	9.98667	3.57087	0.0618394	0.455932	Tnnc1
-0.267003	3.30475	3.57239	0.0617849	0.455932	Ybx2
0.145206	3.59326	3.56701	0.0619779	0.455941	Ddx19b
0.0945053	5.72518	3.56573	0.062024	0.455989	Actr2
0.228447	4.94632	3.55947	0.0622494	0.457159	Bace1
0.291908	6.81025	3.55911	0.0622624	0.457159	Pik3r1
-0.138568	2.57874	3.55471	0.0624214	0.457951	Caml
0.15546	3.71593	3.55283	0.0624894	0.457951	Ccdc132
-0.262041	1.19393	3.55338	0.0624694	0.457951	Proser3
-0.185133	2.24357	3.54856	0.0626443	0.45812	Atat1
0.185621	5.90103	3.54563	0.0627507	0.45812	Atp6v1b2
0.188854	4.06854	3.54576	0.0627461	0.45812	Bahd1
0.224991	2.58523	3.54572	0.0627477	0.45812	Cpm
-0.508296	2.34938	3.54871	0.0626388	0.45812	Ifit1
0.156968	6.56099	3.54655	0.0627174	0.45812	Rdx
0.258139	0.549112	3.54267	0.0628588	0.458619	Ror2
0.194109	5.10486	3.52873	0.0633693	0.459047	5031439G07Rik
0.33043	7.28661	3.52539	0.0634924	0.459047	Akap6
0.184263	6.97404	3.53004	0.0633209	0.459047	Amfr
-0.190065	1.75808	3.53577	0.0631107	0.459047	Anapc15
-0.193519	3.27589	3.52772	0.0634065	0.459047	Ccdc115
0.760253	2.41834	3.52525	0.0634973	0.459047	Comp
0.275439	4.78998	3.5293	0.0633483	0.459047	Gm608
-0.251133	1.86034	3.52479	0.0635145	0.459047	Nt5c
0.172523	4.72353	3.52527	0.0634968	0.459047	Ogfod1
0.145468	2.90536	3.53812	0.0630249	0.459047	Rrp8
-0.134123	4.32351	3.52667	0.0634449	0.459047	Snrpa
0.148211	5.1691	3.52584	0.0634755	0.459047	Sp1
0.13022	5.35028	3.53136	0.0632726	0.459047	Stard8
0.125313	4.66081	3.53068	0.0632976	0.459047	Tcf12
-0.114705	5.15973	3.52945	0.0633429	0.459047	Ubl7
-0.216469	1.28878	3.52181	0.0636242	0.459367	Ccdc134
0.156239	8.62898	3.52143	0.0636384	0.459367	Eif4g1
0.202922	6.41014	3.51973	0.0637013	0.459534	Ulk1
0.200007	4.39357	3.51824	0.0637563	0.459643	Adrb1
0.143372	2.78306	3.51699	0.0638026	0.45969	Hps3
-0.186268	2.56729	3.51403	0.0639124	0.460102	Rpp21
0.160702	3.14024	3.5133	0.0639397	0.460102	Tmem185b
-0.215774	6.10335	3.50917	0.0640933	0.46092	Lgals1
-0.243367	1.05048	3.49254	0.0647155	0.460941	3110056K07Rik
-0.218451	2.31853	3.48975	0.0648206	0.460941	4632428C04Rik
0.154634	5.3608	3.48259	0.0650913	0.460941	4930402H24Rik
0.131123	4.11883	3.48941	0.0648337	0.460941	4930523C07Rik
0.306169	6.05844	3.48494	0.0650024	0.460941	Ankrd52
0.147831	5.3046	3.50785	0.0641425	0.460941	Ap1g1
-0.111098	5.04403	3.49185	0.0647417	0.460941	Ap1m1
-0.152783	2.62483	3.49245	0.0647191	0.460941	Ccdc58
-0.61266	1.46708	3.49004	0.06481	0.460941	Cxcl9
0.162837	7.46484	3.49716	0.0645421	0.460941	Fuca2
0.2263	5.80222	3.50294	0.0643255	0.460941	Jmy
0.271929	4.17838	3.49367	0.0646732	0.460941	Jph1
0.163116	1.80262	3.48143	0.0651351	0.460941	Map3k14
0.131981	3.5747	3.48477	0.0650088	0.460941	Med23
0.191471	3.50661	3.50481	0.0642558	0.460941	Mlh3
0.213971	3.87551	3.48254	0.0650932	0.460941	Naa25
-0.238826	3.94157	3.485	0.065	0.460941	Nsa2
0.189732	3.02646	3.49817	0.0645043	0.460941	Pramef8
0.329111	2.8161	3.48706	0.0649223	0.460941	Prlr
-0.166989	3.49212	3.49457	0.0646394	0.460941	Snrpc
0.188631	7.02886	3.50635	0.0641981	0.460941	Synpo
0.215218	4.04897	3.49474	0.0646331	0.460941	Tgfbi
0.119665	5.55649	3.48198	0.0651144	0.460941	Tmed7
0.30038	2.66602	3.49654	0.0645655	0.460941	Uba6
0.380681	4.32726	3.48727	0.0649144	0.460941	Zbtb38
0.313297	3.81496	3.48933	0.0648365	0.460941	Zfp652
0.364304	3.60061	3.4792	0.0652198	0.461257	Rassf8
-0.179858	5.68547	3.47601	0.065341	0.461831	Ubb
0.375041	1.81453	3.46931	0.0655965	0.462014	Gdf10
-0.524346	1.36403	3.47251	0.0654743	0.462014	Ifit3b
0.115875	4.46777	3.46886	0.0656134	0.462014	Stt3a
-0.108601	4.48498	3.47152	0.065512	0.462014	Taf6
0.237577	6.2734	3.46806	0.0656439	0.462014	Tbx20
-0.104563	5.15285	3.46905	0.0656063	0.462014	Tspan31
0.154732	2.60415	3.46798	0.0656472	0.462014	Zbtb34
-0.204375	7.48833	3.46485	0.0657668	0.462573	Uqcr11
0.175059	3.95393	3.45897	0.0659925	0.463031	Gucy1b3
-0.199512	2.43186	3.45903	0.0659903	0.463031	Ppp2r3d
-0.220743	0.750655	3.46142	0.0658982	0.463031	Sh3bgrl2
0.210223	4.13111	3.45978	0.0659613	0.463031	Zbtb41
0.183135	5.23965	3.45266	0.0662355	0.463552	Atg2a
0.150993	6.01174	3.45183	0.0662677	0.463552	Cbx5
0.222219	4.39786	3.45399	0.066184	0.463552	Cspg4
-0.291003	1.75825	3.45278	0.0662308	0.463552	Flt3l
-0.152891	5.90626	3.45323	0.0662134	0.463552	Psmb6
0.369322	0.568937	3.45014	0.0663326	0.463725	Lonrf3
-0.297135	3.52673	3.44882	0.0663839	0.463802	Meox2
0.113705	4.19879	3.4437	0.0665821	0.464098	3110043O21Rik
-0.189707	4.10414	3.44271	0.0666207	0.464098	Atp6v0e
0.194752	4.61582	3.44138	0.0666725	0.464098	Csf1r
-0.270832	2.70882	3.44335	0.0665957	0.464098	Gja5
-0.297068	2.13085	3.43943	0.0667481	0.464098	Kifc2
0.1934	5.68387	3.44198	0.0666491	0.464098	Mpdz
0.232504	1.67357	3.44004	0.0667246	0.464098	Nup210
0.15511	4.01743	3.44268	0.0666217	0.464098	Vps11
0.178416	6.68815	3.43833	0.0667911	0.464118	Stat3
-0.153149	2.56072	3.4368	0.0668508	0.464253	Med30
0.103861	4.53829	3.43568	0.0668941	0.464274	Spast
0.58832	1.87624	3.43147	0.0670587	0.464299	Ahsg
0.168724	6.17844	3.43237	0.0670234	0.464299	Nek7
0.157219	9.11506	3.43379	0.066968	0.464299	Nnt
-0.17159	1.55461	3.43168	0.0670506	0.464299	Tbc1d25
0.143758	4.22292	3.4302	0.0671085	0.464365	Pskh1
-0.148776	5.60333	3.42579	0.0672812	0.46501	Coq7
0.191934	4.18964	3.42576	0.0672824	0.46501	Tbl1x
-0.214852	5.91156	3.42361	0.0673671	0.465039	Swi5
0.196133	2.89933	3.42444	0.0673342	0.465039	Zfp597
-0.16416	2.81028	3.41965	0.0675227	0.465834	Mospd3
0.137508	3.27977	3.41854	0.0675665	0.465858	Chst15
-0.18988	2.01654	3.41649	0.0676474	0.465878	Nsdhl
0.171579	4.33312	3.41642	0.0676503	0.465878	Zmym4
0.185363	3.35634	3.41305	0.0677834	0.466516	Slc36a1
0.167974	6.84167	3.41086	0.0678702	0.466648	Gys1
0.205264	5.49301	3.40996	0.0679058	0.466648	Lpp
0.185316	7.12373	3.4095	0.0679239	0.466648	Spag9
-0.168525	3.62802	3.40786	0.067989	0.466817	Cxx1a
0.116888	4.80662	3.40061	0.0682776	0.468105	Brd1
0.788629	4.46525	3.40176	0.0682983	0.468105	Scd1
-0.263767	1.81894	3.4015	0.0682421	0.468105	Xpa
0.259379	3.89323	3.39651	0.0684413	0.468806	Osbpl6
0.107621	4.64269	3.39223	0.0686129	0.469703	Ankle2
-0.199813	4.53862	3.387	0.068823	0.470127	Aldh9a1
0.114787	4.40321	3.38285	0.06899	0.470127	Armc8
-0.336953	1.71396	3.38865	0.0687564	0.470127	Ccdc34
-0.102224	4.78913	3.38585	0.068869	0.470127	Dhdds
-0.125775	3.6889	3.38258	0.0690008	0.470127	Jkamp
-0.207511	1.08999	3.38424	0.068934	0.470127	Prr3
0.13576	4.91121	3.38404	0.0689421	0.470127	Ranbp9
-0.165253	4.67598	3.38766	0.0687963	0.470127	Sf3a2
0.143855	5.49558	3.37876	0.0691552	0.470513	Csnk1d
-0.2007	2.36999	3.37815	0.0691799	0.470513	Cstb
0.23182	5.77642	3.37994	0.0691075	0.470513	Slc39a14
-0.234262	1.69259	3.37563	0.0692817	0.470928	Cyp4f13
0.257867	0.53582	3.37418	0.0693406	0.471051	Pcdhgb6
-0.215063	2.30744	3.36989	0.069515	0.471142	Nmi
0.41398	7.16409	3.36836	0.0695774	0.471142	Ptgds
0.169024	6.42469	3.36782	0.0695991	0.471142	Rmnd5a
0.140674	5.219	3.37175	0.0694393	0.471142	Rras2
0.214885	3.29173	3.36921	0.0695426	0.471142	Socs6
0.130069	2.7397	3.37202	0.0694284	0.471142	Wars2
0.313622	3.89319	3.36284	0.0698022	0.471509	Ccdc85c
-0.321515	1.85336	3.36274	0.0698066	0.471509	Dpp4
-0.21716	3.61432	3.36248	0.0698169	0.471509	Gas5
-0.174693	3.81731	3.36437	0.06974	0.471509	Plat
0.200388	5.87618	3.36062	0.069893	0.471747	Sipa1l2
-0.169632	5.04068	3.35868	0.0699724	0.471832	Mcee
0.12274	5.28508	3.35832	0.0699874	0.471832	Znfx1
0.264175	6.04308	3.35599	0.0700827	0.472198	Vwf
-0.148479	7.40409	3.35282	0.0702129	0.472427	Capns1
-0.224291	0.952999	3.35019	0.0703213	0.472427	Cep152
0.159706	4.43081	3.35224	0.0702367	0.472427	Dstyk
0.25009	1.62726	3.35115	0.0702817	0.472427	Ifnlr1
0.157299	4.42827	3.35141	0.0702711	0.472427	Stard13
-0.161171	2.36269	3.34774	0.0704224	0.472438	Rpp30
0.251499	2.57319	3.34899	0.0703706	0.472438	Slc35e4
0.138896	3.14038	3.34717	0.0704459	0.472438	Tbl2
0.140937	6.15332	3.34235	0.0706448	0.473497	Matr3
-0.180294	3.65483	3.32922	0.0711907	0.473604	Anxa3
0.385741	2.91866	3.32329	0.0714389	0.473604	Cnksr1
0.22611	7.40451	3.33248	0.0710546	0.473604	Corin
0.151002	6.1412	3.33832	0.070812	0.473604	Dpp8
-0.233719	2.86599	3.32816	0.0712349	0.473604	Ecscr
0.119298	7.85532	3.32978	0.0711672	0.473604	Ehbp1l1
0.155779	3.12021	3.32324	0.0714409	0.473604	Eid2b
0.121547	4.96965	3.33013	0.0711527	0.473604	Fgfr1
0.213265	5.9443	3.33805	0.0708233	0.473604	Gsk3b
0.120389	3.70701	3.33708	0.0708634	0.473604	Hexb
-0.126869	5.16156	3.32329	0.0714386	0.473604	Ldb1
-0.165374	4.01081	3.33719	0.0708587	0.473604	Metap1d
0.113194	5.0843	3.32868	0.0712132	0.473604	Mtmr6
-0.203378	4.51246	3.32884	0.0712065	0.473604	Ppp1r11
-0.22389	4.49461	3.32492	0.0713706	0.473604	Rp9
-0.129487	4.34973	3.33115	0.0711101	0.473604	Ssu72
-0.260443	3.7763	3.32677	0.071293	0.473604	Stat2
0.219969	4.97932	3.32564	0.0713404	0.473604	Taco1
-0.199182	11.2777	3.3253	0.0713547	0.473604	Tnni3
0.134338	3.55516	3.31988	0.0715818	0.473993	Ndfip2
0.180831	2.18575	3.32009	0.0715729	0.473993	Zbtb42
0.168204	7.47134	3.31643	0.0717266	0.47468	Acox1
-0.100101	5.98962	3.31385	0.0718356	0.474856	Ecsit
0.159266	7.07065	3.31402	0.0718282	0.474856	Slc20a2
0.325028	5.59541	3.31165	0.0719283	0.475197	Arhgap5
0.146823	7.52037	3.30494	0.0722122	0.475199	Ank
-0.104167	3.74091	3.30288	0.0722995	0.475199	Fbf1
0.197483	5.46524	3.30345	0.0722751	0.475199	Notch3
-0.208629	4.07842	3.30323	0.0722844	0.475199	Pigu
-0.156621	2.37818	3.30749	0.072104	0.475199	Psmd10
0.174882	3.77451	3.30739	0.0721083	0.475199	Rab31
0.107914	4.94837	3.30362	0.072268	0.475199	Rnf139
0.227934	6.26729	3.30595	0.072169	0.475199	Taok1
-0.238745	2.073	3.30752	0.0721029	0.475199	Tmem173
0.329297	4.63179	3.29184	0.0727698	0.475581	Dennd4c
0.193466	1.31734	3.29225	0.0727521	0.475581	E130307A14Rik
0.167342	4.42837	3.29703	0.072548	0.475581	Etv3
0.198545	4.86199	3.29788	0.0725118	0.475581	Gnptab
0.127825	3.85021	3.29335	0.0727052	0.475581	Ino80
0.170733	8.57447	3.29423	0.0726676	0.475581	Ltbp4
-0.192527	7.6296	3.29303	0.0727187	0.475581	Prdx5
0.175447	7.06483	3.29861	0.0724811	0.475581	Slc6a6
0.123671	4.41759	3.29287	0.0727258	0.475581	Stag1
0.212969	7.70698	3.29615	0.0725857	0.475581	Ugp2
0.198226	5.1064	3.28986	0.0728546	0.475596	H6pd
-0.243169	4.87871	3.29079	0.0728146	0.475596	Tmed5
0.128437	4.3954	3.28772	0.0729463	0.475656	Atl3
0.139308	4.58944	3.28864	0.0729066	0.475656	Vps33a
0.180568	2.77392	3.28604	0.0730181	0.475855	Slc25a32
-0.110626	5.50069	3.28286	0.0731547	0.476476	Slc39a1
-0.161442	2.2247	3.28099	0.0732351	0.476731	Snx7
-0.224204	2.31349	3.26592	0.0738872	0.477061	2010320M18Rik
0.246834	2.29387	3.26662	0.0738567	0.477061	Adra1d
-0.140662	6.96422	3.27591	0.0734541	0.477061	Calm3
0.198502	4.93641	3.26984	0.0737169	0.477061	Crebrf
0.321909	0.553792	3.26909	0.0737494	0.477061	D830046C22Rik
-0.200459	1.41215	3.26634	0.0738687	0.477061	Dhfr
-0.132421	4.34352	3.27665	0.0734223	0.477061	Hmgn2
0.160498	4.61949	3.27029	0.0736975	0.477061	Mief1
0.284217	5.60064	3.27267	0.0735941	0.477061	Ncoa2
0.217467	6.20376	3.26548	0.0739062	0.477061	Neo1
0.269732	1.96862	3.26708	0.0738365	0.477061	Ptgir
0.0763584	4.70725	3.27725	0.0733963	0.477061	Rraga
-0.0976852	6.77443	3.27857	0.0733396	0.477061	Serf2
0.133027	3.36599	3.27028	0.0736977	0.477061	Siae
-0.160939	3.71139	3.27446	0.0735168	0.477061	Zdhhc1
0.139047	5.42669	3.26195	0.0740597	0.477651	AU040320
0.139597	6.59062	3.26148	0.0740804	0.477651	Zdhhc5
0.20016	6.41007	3.25853	0.074209	0.478212	Ipo7
-0.257978	0.861088	3.24572	0.0747706	0.478836	4930526I15Rik
-0.13939	4.20774	3.24072	0.0749911	0.478836	Alkbh3
0.24569	0.907568	3.24753	0.0746911	0.478836	BC048403
0.215444	4.55098	3.24027	0.0750114	0.478836	Bcor
0.145556	3.82786	3.24565	0.0747736	0.478836	Ccdc93
0.190132	2.32085	3.25079	0.0745479	0.478836	Dse
-0.24036	7.32009	3.24453	0.0748232	0.478836	Fxyd1
0.16276	5.42708	3.25329	0.074438	0.478836	Ltbp1
0.302511	2.44313	3.24522	0.0747927	0.478836	Met
-0.235642	7.18855	3.24554	0.0747787	0.478836	Ndufs6
0.464831	5.00717	3.24182	0.0749428	0.478836	Prox1
0.167288	4.32015	3.2461	0.0747541	0.478836	Ric1
0.301111	3.14758	3.25128	0.0745264	0.478836	Slit3
0.131587	5.74051	3.24596	0.0747601	0.478836	Tollip
0.129889	3.8885	3.24031	0.0750092	0.478836	Txndc16
0.205831	4.22432	3.24284	0.0748976	0.478836	Vwa7
-0.138974	2.12946	3.24297	0.0748918	0.478836	Xrcc4
-0.179484	3.23519	3.23924	0.0750568	0.478861	S100a13
0.209279	7.94423	3.23567	0.0752147	0.479338	Mapkapk2
0.302517	3.45362	3.23581	0.0752083	0.479338	Tlr4
0.221712	4.94992	3.23406	0.0752861	0.479528	Herc3
0.197283	3.68911	3.22939	0.0754937	0.479791	Ascc3
-0.132551	6.40233	3.22993	0.0754696	0.479791	Eci2
0.169048	3.88228	3.22978	0.0754762	0.479791	Spg11
0.243899	1.12598	3.22968	0.0754809	0.479791	Tcp11l1
0.145804	4.55617	3.22428	0.0757215	0.480254	Casd1
0.188379	5.74059	3.22384	0.075741	0.480254	Clec16a
-0.181656	2.53171	3.22215	0.0758164	0.480254	Coa4
-0.165334	3.88087	3.22216	0.0758159	0.480254	Eny2
-0.127767	8.13164	3.22654	0.0756205	0.480254	Fkbp4
-0.159781	5.2941	3.22453	0.0757103	0.480254	Kxd1
0.141417	3.66679	3.22096	0.0758698	0.480328	Ermp1
-0.221245	0.920561	3.21902	0.0759566	0.480377	Nmrk1
-0.182723	3.31479	3.21892	0.0759609	0.480377	Ptpn2
0.361797	0.495185	3.21764	0.0760186	0.480479	Trim67
0.182644	2.42363	3.21475	0.0761481	0.480814	Clcn6
-0.107739	4.78607	3.2146	0.076155	0.480814	Ptges3
0.131057	4.76362	3.21192	0.0762755	0.481026	Gmps
0.215739	3.53539	3.21107	0.0763137	0.481026	Rhbdl3
0.181229	4.27294	3.21235	0.0762561	0.481026	Scn7a
0.14327	8.37013	3.20785	0.076459	0.481679	Hspa5
0.119365	3.64813	3.20208	0.0767197	0.481696	1200014J11Rik
0.254194	8.33265	3.19604	0.0769937	0.481696	Abcc9
-0.135662	2.50917	3.1939	0.0770908	0.481696	Asb12
-0.148871	2.3463	3.19895	0.0768616	0.481696	Ccdc137
0.101743	4.06278	3.20286	0.0766844	0.481696	Cdc42se1
0.207049	4.37151	3.19213	0.0771716	0.481696	Ctnnal1
0.214716	7.38764	3.19417	0.0770787	0.481696	Cyfip2
0.168914	5.35111	3.2028	0.0766871	0.481696	Dirc2
0.173241	6.24385	3.19255	0.0771524	0.481696	Gna12
-0.2469	1.18134	3.19911	0.0768541	0.481696	Itgb3bp
0.14461	5.91339	3.19843	0.0768853	0.481696	Mavs
0.132847	6.88425	3.19521	0.0770315	0.481696	Myo1c
-0.0907981	4.38488	3.2017	0.0767369	0.481696	Nsmce4a
-0.13558	6.46473	3.20252	0.0766998	0.481696	Pkig
-0.1468	4.40719	3.20549	0.0765653	0.481696	Rbm8a
0.159483	3.20193	3.19492	0.0770448	0.481696	Sirt1
0.143756	3.82647	3.20116	0.0767613	0.481696	Slc30a7
0.26245	2.91387	3.19107	0.0772197	0.481736	Slc16a6
0.214193	4.29917	3.18947	0.0772928	0.481931	Fam13a
0.16482	7.51386	3.18533	0.0774821	0.482851	Slc12a7
-0.241586	1.66582	3.18415	0.0775364	0.482928	Praf2
0.183453	5.19463	3.17852	0.0777948	0.483989	Dnajc13
0.189126	5.07608	3.17769	0.0778327	0.483989	Fryl
-0.139813	4.01836	3.17831	0.0778045	0.483989	Galm
-0.206099	3.99246	3.17598	0.0779117	0.484219	Leng1
0.0977362	4.97865	3.17243	0.0780752	0.484974	Magt1
-0.315045	6.03832	3.16682	0.0783345	0.485183	Acot2
0.161458	8.31872	3.16453	0.078441	0.485183	Ahnak
0.164555	4.93231	3.15733	0.0787757	0.485183	Arl5a
-0.129826	5.24508	3.1688	0.0782429	0.485183	Arpc3
0.229146	5.35288	3.15931	0.0786835	0.485183	Bcl9l
0.112996	6.21494	3.16152	0.0785808	0.485183	Ccny
-0.198426	2.653	3.15616	0.0788305	0.485183	Cradd
0.190935	5.27687	3.16699	0.0783269	0.485183	Dapk1
0.220453	1.43911	3.16031	0.0786371	0.485183	Fdxacb1
0.175302	4.77144	3.16113	0.0785986	0.485183	Heatr5a
-0.20659	2.32083	3.16493	0.0784221	0.485183	Lrrc27
0.151239	3.8137	3.15798	0.0787454	0.485183	Pik3c2a
-0.329227	0.962323	3.1554	0.0788659	0.485183	Pin4
-0.135989	5.19609	3.15555	0.0788587	0.485183	Pyurf
0.168516	5.0188	3.1607	0.0786189	0.485183	Rabgap1
-0.246713	1.33729	3.16563	0.07839	0.485183	Stmn1
0.177361	3.4657	3.16626	0.0783605	0.485183	Tbc1d14
-0.166625	4.80064	3.16425	0.0784539	0.485183	Ubl5
0.144334	2.59644	3.15293	0.0789812	0.48554	2610301B20Rik
0.612179	2.50867	3.15	0.0791181	0.48554	Cacna2d2
0.158991	3.17445	3.14994	0.0791209	0.48554	Dock7
0.176523	8.17742	3.14997	0.0791198	0.48554	Lmo7
-0.270598	3.12365	3.14966	0.0791344	0.48554	Ndufaf2
0.119839	4.06719	3.14397	0.0794013	0.486192	Brf1
0.136711	6.60511	3.14123	0.07953	0.486192	Cast
-0.159376	3.2127	3.14135	0.0795244	0.486192	Magoh
0.205589	3.08247	3.14317	0.0794388	0.486192	Mars2
-0.14301	4.94478	3.14309	0.0794427	0.486192	Mrpl13
0.171183	4.78601	3.14111	0.0795357	0.486192	Nup98
0.174171	6.9583	3.1461	0.079301	0.486192	Tom1l2
-0.175466	4.85276	3.13849	0.0796593	0.48669	Alad
0.143193	3.57687	3.13701	0.0797295	0.486861	Traf6
0.148169	3.44832	3.13331	0.0799044	0.486878	Fam13b
0.164432	2.23395	3.13062	0.0800316	0.486878	Hace1
0.221706	5.74984	3.13228	0.0799529	0.486878	Kcnj5
-0.088404	5.02802	3.12981	0.0800701	0.486878	Pgrmc2
-0.144425	3.76953	3.13022	0.0800505	0.486878	Sec11a
-0.146326	4.84662	3.13349	0.0798955	0.486878	Sumo3
0.26164	4.78809	3.13018	0.0800528	0.486878	Thbs2
0.157581	4.28079	3.13315	0.0799117	0.486878	Usp38
-0.119528	4.50858	3.12854	0.0801304	0.486989	Elovl5
-0.191258	2.36746	3.12628	0.080238	0.487129	Cep95
0.246755	1.24	3.12694	0.0802067	0.487129	Kcnt2
0.120816	3.78699	3.12406	0.0803435	0.487513	Maml1
-0.317606	0.709253	3.12164	0.0804591	0.487822	Plaur
-0.10898	4.83834	3.12122	0.080479	0.487822	Prmt5
0.148979	5.2758	3.11724	0.0806692	0.488462	Cipc
0.221146	4.73504	3.1179	0.0806374	0.488462	Gga2
-0.218367	3.32122	3.11576	0.08074	0.488634	Impa2
-0.18553	5.4721	3.11466	0.0807925	0.488695	Cox6a1
-0.249223	1.74126	3.10044	0.0814772	0.488846	Afap1l2
-0.243972	0.998929	3.09248	0.0818633	0.488846	Arhgef26
0.174744	5.40041	3.09368	0.081805	0.488846	Arid1b
0.153177	4.26788	3.0946	0.0817603	0.488846	Atp8b2
-0.159749	6.96313	3.10986	0.0810231	0.488846	Comt
-0.162201	5.59619	3.10151	0.0814254	0.488846	Csnk2b
0.165981	4.93513	3.11185	0.0809276	0.488846	Dip2b
0.0836102	3.66799	3.09114	0.0819286	0.488846	Dusp22
0.241476	3.8708	3.10588	0.0812147	0.488846	Fam208b
0.297286	2.10165	3.10553	0.0812316	0.488846	Fan1
-0.173814	3.7879	3.10904	0.0810624	0.488846	Gja3
-0.232603	2.12423	3.10538	0.0812386	0.488846	Gpr182
-0.158056	4.05057	3.09942	0.0815266	0.488846	Gtf2h5
0.135541	4.15553	3.10752	0.0811359	0.488846	Kbtbd2
-0.237594	2.40846	3.09056	0.0819569	0.488846	Kin
0.268582	5.63602	3.09506	0.0817381	0.488846	Lama5
0.164087	6.11476	3.09305	0.0818354	0.488846	Pcnt
0.138318	6.67664	3.10437	0.0812875	0.488846	Prnp
-0.196668	6.60953	3.10722	0.0811502	0.488846	Rpl41
0.160237	0.934974	3.10266	0.0813699	0.488846	Siah1b
0.251433	0.722311	3.10702	0.0811598	0.488846	Sox5
0.121264	4.02621	3.09654	0.0816662	0.488846	Tmem168
0.20302	6.18066	3.10083	0.0814587	0.488846	Tnrc6b
0.178983	5.55111	3.09046	0.0819618	0.488846	Tnrc6c
0.139543	6.3748	3.09858	0.0815672	0.488846	Wdtc1
0.140452	2.98599	3.09921	0.0815366	0.488846	Zbtb14
-0.178324	1.33844	3.0909	0.08194	0.488846	Zfp101
-0.28347	4.52452	3.08472	0.0822415	0.489362	Aqp7
-0.326504	2.13278	3.08779	0.0820915	0.489362	Fcer1g
0.161498	3.38333	3.08659	0.0821501	0.489362	Nup205
-0.198932	4.86085	3.08434	0.0822603	0.489362	Nxf1
0.174518	2.69857	3.08494	0.082231	0.489362	Zswim6
0.145267	3.45037	3.0821	0.0823695	0.489507	Farp1
0.175585	7.33638	3.08283	0.0823342	0.489507	Slc6a8
-0.205828	1.63223	3.08011	0.082467	0.489834	Zfp111
0.177154	2.72255	3.07906	0.0825189	0.489889	Mertk
0.114931	5.60279	3.0775	0.0825953	0.490091	Otud7b
0.152538	3.9	3.07608	0.0826647	0.490251	Tm7sf3
0.174001	4.97335	3.07379	0.0827777	0.490594	Clcn3
0.156108	4.47396	3.07232	0.0828502	0.490594	Heatr3
-0.108762	5.11525	3.07257	0.0828375	0.490594	Sart1
0.153182	5.77	3.06739	0.0830935	0.490775	Cnst
0.219034	1.48775	3.06859	0.0830341	0.490775	Ifit1bl1
-0.322012	1.58284	3.06753	0.0830861	0.490775	Mcm5
-0.131741	4.33623	3.06962	0.0829829	0.490775	Ostf1
-0.125886	4.62858	3.07026	0.0829514	0.490775	Zscan26
0.395479	1.13217	3.05977	0.0834706	0.491994	Plekhh1
0.147959	5.67628	3.06116	0.0834018	0.491994	Prkacb
-0.366241	3.02186	3.06058	0.0834305	0.491994	Upf3b
0.172588	3.02208	3.06034	0.0834425	0.491994	Zfp316
0.139293	2.66208	3.05159	0.0838783	0.492084	Arl14ep
0.223081	5.83944	3.05385	0.0837655	0.492084	Chd6
-0.331619	0.410238	3.04891	0.0840122	0.492084	E2f1
-0.13694	6.45259	3.04835	0.0840403	0.492084	Eif3h
-0.252217	2.38144	3.05798	0.0835597	0.492084	Fam111a
0.172688	3.74562	3.05512	0.0837021	0.492084	Ocrl
-0.175899	3.32058	3.04893	0.0840109	0.492084	Pml
0.16014	5.32204	3.05048	0.0839338	0.492084	Ptdss1
-0.355203	1.66036	3.05713	0.0836019	0.492084	Reep6
0.162037	4.94149	3.05448	0.0837341	0.492084	Sacm1l
0.194711	6.05956	3.0522	0.0838479	0.492084	Sik3
0.257105	1.24397	3.05446	0.0837351	0.492084	St8sia6
0.184195	7.03287	3.04951	0.0839823	0.492084	Ubr4
0.130756	5.61434	3.04506	0.0842049	0.492548	Luzp1
0.235112	3.35748	3.04544	0.0841859	0.492548	Slc22a23
0.0948127	5.36606	3.04214	0.0843516	0.492591	Agpat6
0.161367	3.22719	3.04119	0.084399	0.492591	Helb
0.217875	5.34901	3.04076	0.0844207	0.492591	Irs1
0.192016	3.47647	3.04137	0.0843904	0.492591	Pim1
-0.385992	3.29697	3.04066	0.0844259	0.492591	Rtn4r
0.263118	4.27197	3.03954	0.0844821	0.492607	Lgr6
0.15428	2.38669	3.03891	0.084514	0.492607	Ptpdc1
-0.179362	4.57424	3.03455	0.0847339	0.49325	Mrpl41
-0.0870739	6.8377	3.03462	0.08473	0.49325	Pmpcb
0.115846	4.49619	3.03418	0.0847527	0.49325	Wdr41
0.340334	1.38577	3.03202	0.0848618	0.493387	Ahrr
0.162857	5.01334	3.03281	0.0848216	0.493387	Odc1
0.344666	1.33066	3.02831	0.0850494	0.494229	Gm12295
-0.175149	1.8664	3.02603	0.0851651	0.494652	Ppwd1
0.178715	6.41212	3.02412	0.0852624	0.494968	Agtpbp1
-0.199425	6.1117	3.02186	0.0853774	0.495387	Mlf1
0.135484	5.7857	3.01596	0.085678	0.495531	Ide
0.140117	3.49885	3.01555	0.085699	0.495531	Mecom
0.149751	5.24252	3.01762	0.0855936	0.495531	Prkce
-0.178691	4.57872	3.01886	0.0855303	0.495531	Sipa1
-0.074196	5.4452	3.01835	0.0855562	0.495531	Stk25
0.115548	3.60826	3.01853	0.0855469	0.495531	Syt11
-0.198268	5.44499	3.01547	0.0857031	0.495531	Tagln2
-0.0944781	4.79754	3.01407	0.0857751	0.495571	G6pc3
0.150411	4.24921	3.01366	0.0857959	0.495571	Sh3bp5l
-0.222848	5.08241	3.01142	0.0859109	0.495987	Hypk
[truncated: 9,537 more rows]

## Sheet: S2
Table S2: RNA-seq analysis in Pb-treated females
logFC	logCPM	F	PValue	FDR	symbol
-0.35398	8.6173	19.4201	2.74795e-05	0.0950211	Asb2
-0.250484	4.26441	20.2153	1.94777e-05	0.0950211	Pelp1
-0.258103	3.61338	19.6716	2.46382e-05	0.0950211	Prpf31
-0.321685	3.37878	18.4937	4.11882e-05	0.0950211	Rnmtl1
-0.202236	5.35451	18.6995	3.76339e-05	0.0950211	Rtcb
0.485352	1.99903	16.7145	9.06809e-05	0.116223	Cd28
-0.237234	6.58339	17.328	6.89515e-05	0.116223	Cdc37
-0.388539	2.49611	16.797	8.73881e-05	0.116223	Hscb
-0.203837	11.1167	16.8363	8.58648e-05	0.116223	__ambiguous
0.277496	3.21395	16.4116	0.000103884	0.119831	Snx33
-0.406046	2.90474	16.0038	0.000124853	0.130925	Creld2
0.538704	2.45761	14.303	0.000271445	0.186731	9230112J17Rik
0.397184	4.06237	13.7173	0.000356055	0.186731	Abcb1a
0.336155	3.09474	14.2255	0.000281329	0.186731	Calr3
-0.578271	2.55987	13.6212	0.000372328	0.186731	Creb3l1
0.317164	3.42685	14.2985	0.000271999	0.186731	Gclc
0.440587	0.823228	13.9445	0.000320405	0.186731	Gdpgp1
0.307942	6.29181	14.7848	0.000217475	0.186731	Mat2a
-0.271538	5.05559	13.7204	0.00035554	0.186731	Nt5c3
0.309158	2.91681	14.3349	0.000267477	0.186731	Parp8
-0.419469	6.07566	14.8347	0.000212556	0.186731	Pnrc1
0.372016	6.0584	13.7036	0.000358327	0.186731	Ppip5k1
0.526894	2.748	14.1282	0.000294273	0.186731	Tmtc2
-0.582522	2.77246	13.1869	0.00045603	0.21918	Nfil3
0.427092	4.07865	13.0885	0.000477558	0.220345	Srxn1
-0.250558	4.34352	12.3841	0.000665559	0.274207	Hmgn2
-0.176173	6.02844	12.5382	0.000618772	0.274207	Kars
-0.232226	3.53445	12.3839	0.000665609	0.274207	Pold2
0.286636	3.87245	11.9551	0.000815964	0.276828	Kalrn
0.658808	3.36873	12.1362	0.000748583	0.276828	Kcnv2
-0.278598	3.73582	12.1042	0.000760067	0.276828	Lsmem1
-0.275647	3.66031	12.0803	0.000768742	0.276828	Mea1
0.501439	2.76696	12.0058	0.000796469	0.276828	Plet1os
-0.335169	1.40373	12.0672	0.000773543	0.276828	Zfat
0.458249	0.986387	11.8824	0.000844716	0.278394	Mpv17l
0.858657	1.59935	11.7157	0.00091472	0.293092	Tmprss13
0.410295	1.5622	11.5543	0.000988169	0.299811	2810001G20Rik
-0.307037	3.9112	11.5833	0.00097454	0.299811	Maged2
0.448288	2.47889	11.5012	0.00101367	0.299811	Scai
-0.288179	3.32112	11.2554	0.00114073	0.326141	1700017B05Rik
-0.397304	1.63504	11.2219	0.00115924	0.326141	L1cam
-0.553149	1.84807	10.942	0.0013269	0.332734	Aldh1a2
-0.326589	4.19252	11.1258	0.00121419	0.332734	Dnaja1
-0.325715	1.24619	10.8511	0.00138657	0.332734	Gmds
-0.240305	6.89807	10.9297	0.00133479	0.332734	Grb14
0.296038	5.1318	10.7698	0.00144228	0.332734	Idh1
-0.378599	1.17633	10.9283	0.0013357	0.332734	Magohb
-0.172238	4.56225	10.8107	0.00141399	0.332734	Mrpl49
-0.181659	3.22724	10.8522	0.00138581	0.332734	Pla2g6
0.215435	4.60782	11.0252	0.00127458	0.332734	Ubp1
-0.267914	6.71492	10.5915	0.0015727	0.339689	Col6a1
0.560782	3.12058	10.5179	0.00163009	0.339689	Dach1
-0.167026	5.09719	10.1877	0.00191513	0.339689	Dnajb11
-0.149393	5.2756	10.5356	0.00161611	0.339689	Eif3d
0.177544	6.58464	10.3776	0.00174543	0.339689	Eif5
-0.283317	7.20239	10.6023	0.00156449	0.339689	Myh9
0.492935	2.43616	10.162	0.00193938	0.339689	Nav3
-0.169105	8.71476	10.6194	0.00155155	0.339689	Ndufa10
-0.208696	2.99061	10.1876	0.00191523	0.339689	Papss1
-0.144384	5.71298	10.2088	0.00189542	0.339689	Set
0.19379	3.80321	10.2243	0.00188112	0.339689	Tfdp1
-0.265591	2.72674	10.1717	0.00193022	0.339689	Ttc27
-0.382016	5.16297	10.3837	0.00174021	0.339689	Tuba1a
0.259919	5.38638	10.4611	0.00167577	0.339689	Txnrd1
-0.142145	5.05499	10.2855	0.00182574	0.339689	Wdr33
-0.336121	3.80393	10.1575	0.0019436	0.339689	Wfdc1
0.520303	0.680706	10.0947	0.00200437	0.340006	Kif21b
-0.174443	9.54248	10.1136	0.00198593	0.340006	Pkm
-0.39361	1.17703	10.0104	0.00208897	0.349221	Eda
0.589625	4.30401	9.9169	0.00218716	0.356396	Gck
0.222247	3.77842	9.89565	0.00221013	0.356396	Paxip1
-0.27451	2.42551	9.85436	0.00225547	0.356396	Pmvk
-0.315093	3.2382	9.87764	0.00222978	0.356396	Rbm14
-0.238762	3.05595	9.76253	0.00235981	0.367843	Itfg2
-0.23952	3.08608	9.30178	0.00296397	0.370289	6330408A02Rik
0.347072	1.03398	9.34145	0.00290617	0.370289	Arid3a
-0.254914	8.7304	9.30938	0.00295281	0.370289	Atp5o
-0.335347	2.25635	9.617	0.00253549	0.370289	Bud13
0.201575	3.40609	9.57807	0.00258474	0.370289	Chfr
-0.307982	6.94792	9.32818	0.00292538	0.370289	Col6a2
-0.316336	2.49264	9.58877	0.00257111	0.370289	Gng10
-0.275903	5.31189	9.34793	0.00289683	0.370289	Gstm2
-0.317016	4.25416	9.46126	0.00273854	0.370289	H3f3a
0.162993	4.4167	9.68887	0.0024471	0.370289	Hectd3
-0.216384	9.85014	9.28399	0.00299028	0.370289	Hsp90ab1
-0.327651	0.877672	9.69813	0.00243594	0.370289	Poc1a
-0.165727	4.95287	9.3105	0.00295117	0.370289	Prcc
0.464654	2.51393	9.45211	0.00275099	0.370289	Rasa4
-0.182938	3.58975	9.26574	0.00301752	0.370289	Tada3
0.336744	2.11478	9.56194	0.00260544	0.370289	Taf4b
0.440476	4.50933	9.28345	0.0029911	0.370289	Tnik
-0.342671	9.98667	9.51509	0.00266652	0.370289	Tnnc1
0.25819	3.04852	9.32772	0.00292604	0.370289	Trim68
0.405627	0.263283	9.34958	0.00289446	0.370289	Zfp939
-0.327016	8.10236	9.17757	0.00315281	0.374924	Atp5h
-0.240833	5.90626	9.18264	0.00314487	0.374924	Psmb6
-0.241978	4.40719	9.20073	0.00311668	0.374924	Rbm8a
-0.227807	9.74012	9.14539	0.00320373	0.377092	Fth1
0.45976	3.19613	9.06136	0.00334077	0.377802	1500017E21Rik
-0.150463	7.11244	9.06372	0.00333684	0.377802	Anxa6
-0.155021	5.80734	9.09327	0.00328804	0.377802	Psmc2
-0.345771	1.76973	9.09355	0.00328757	0.377802	Zscan2
-0.208973	5.15511	9.0255	0.00340108	0.380888	Clta
0.232684	2.85286	8.96535	0.00350479	0.383333	4632415L05Rik
0.358477	4.51382	8.94203	0.00354588	0.383333	Aox1
0.514575	0.608915	8.9194	0.00358623	0.383333	Cd86
0.483336	2.6486	8.91781	0.00358908	0.383333	Mir22hg
0.234626	2.91895	8.9589	0.00351611	0.383333	Rnmt
0.307756	2.69087	8.85932	0.00369567	0.387542	1810026B05Rik
0.272382	1.59679	8.8756	0.00366567	0.387542	Sft2d3
-0.190909	4.90803	8.8203	0.0037686	0.391629	Cnih1
0.16343	4.89716	8.65392	0.00409669	0.397647	Arih2
0.216806	3.57138	8.70262	0.0039977	0.397647	Ddhd2
-0.37959	2.17279	8.66905	0.00406567	0.397647	Mcm3
-0.268456	0.891906	8.74991	0.00390395	0.397647	Nup43
-0.190949	2.62013	8.71705	0.00396885	0.397647	Pak4
-0.380352	3.11154	8.75998	0.00388428	0.397647	Rps28
-0.256424	4.67598	8.68713	0.00402892	0.397647	Sf3a2
-0.364169	3.76227	8.6512	0.0041023	0.397647	Tmem100
0.370777	3.05489	8.59878	0.00421186	0.397821	Fam161b
0.365018	1.48775	8.60749	0.00419344	0.397821	Ifit1bl1
0.354055	5.71442	8.59892	0.00421155	0.397821	Srsf5
-0.29557	2.45888	8.58458	0.00424205	0.397821	Usp11
-0.126509	5.06547	8.55005	0.00431642	0.401531	Amz2
0.275805	1.72382	8.41093	0.00463002	0.404358	Ap1g2
-0.207123	3.59072	8.37984	0.00470327	0.404358	Cnpy3
0.217333	3.59326	8.3539	0.00476531	0.404358	Ddx19b
-0.147233	4.03512	8.39286	0.00467245	0.404358	Dhx38
0.30153	4.03172	8.49776	0.00443162	0.404358	Epdr1
0.229184	4.3251	8.42302	0.00460186	0.404358	Fbxo9
0.267608	1.82138	8.33899	0.00480136	0.404358	Inpp5f
0.298893	3.20321	8.32413	0.00483758	0.404358	Mettl20
-0.347718	2.55898	8.32647	0.00483185	0.404358	Plcb1
-0.316221	3.08215	8.44434	0.00455261	0.404358	Ticam1
-0.247651	3.85069	8.33593	0.00480879	0.404358	Timm17b
0.268983	1.19072	8.39972	0.00465628	0.404358	Trmt10b
-0.192911	7.04759	8.38504	0.00469094	0.404358	Txn2
-0.28276	1.25361	8.47791	0.00447619	0.404358	Zfp341
-0.169271	4.9501	8.28617	0.00493135	0.406308	Exosc10
-0.447213	2.38362	8.2902	0.0049213	0.406308	Mall
-0.286188	4.47321	8.24852	0.00502622	0.411188	Cisd3
-0.172383	5.11525	8.22121	0.00509623	0.413979	Sart1
-0.202221	4.26929	8.20692	0.00513328	0.414073	Bcs1l
-0.242154	7.40858	8.16722	0.00523763	0.419556	Bcam
-0.222574	4.98263	8.13964	0.00531142	0.422532	Clpp
-0.354793	5.08241	8.11044	0.00539073	0.423007	Hypk
0.302656	3.28147	8.12026	0.00536393	0.423007	Pikfyve
-0.557968	1.57469	8.09468	0.00543405	0.423525	Ngfrap1
-0.134885	4.54296	7.93092	0.00590611	0.42429	1110004F10Rik
-0.2184	12.8639	7.98605	0.0057426	0.42429	Actc1
-0.225757	6.02184	7.902	0.00599382	0.42429	Anxa5
-0.183567	4.93416	7.8873	0.0060389	0.42429	Atp6v1g1
-0.411422	2.50319	7.77336	0.00640062	0.42429	Banp
-0.208463	6.96422	7.74653	0.00648903	0.42429	Calm3
-0.350124	0.715792	7.72963	0.00654538	0.42429	Cchcr1
0.270707	2.27041	7.8464	0.00616626	0.42429	Cd302
0.263503	4.04998	8.00313	0.00569293	0.42429	Chuk
-0.226324	4.48612	7.88649	0.00604141	0.42429	Dhrs7
-0.240554	6.2897	7.77143	0.00640695	0.42429	Dstn
-0.230959	6.32493	7.86027	0.00612276	0.42429	Eef1g
-0.127783	5.54845	7.82118	0.00624614	0.42429	Eif3l
0.233188	2.28187	7.74196	0.00650424	0.42429	Fastkd3
-0.94395	1.13527	7.81712	0.00625911	0.42429	Gm7120
-0.327299	1.50674	7.69638	0.00665769	0.42429	Il17d
-0.232209	3.42975	8.03316	0.00560663	0.42429	Med19
0.153948	5.29314	7.86587	0.00610529	0.42429	Nsmaf
-0.180789	3.56829	7.78044	0.00637751	0.42429	Pcna
-0.231217	4.38241	7.96347	0.005809	0.42429	Pdia4
0.401593	6.50225	7.80211	0.00630728	0.42429	Pfkfb2
-0.234625	1.72645	7.79973	0.00631496	0.42429	Rbmxl1
-0.341706	5.93468	7.77317	0.00640124	0.42429	Rpl23a
0.411535	3.9886	7.95744	0.00582686	0.42429	Slco5a1
-0.167919	4.88857	7.75392	0.00646456	0.42429	Ssbp3
0.196268	3.45671	7.8	0.00631409	0.42429	St6gal1
-0.228657	4.12691	7.71224	0.00660388	0.42429	Tmem11
-0.151063	5.15285	7.7184	0.0065831	0.42429	Tspan31
-0.307162	6.27208	7.76604	0.00642463	0.42429	Tubb5
0.177307	3.70271	7.76792	0.00641847	0.42429	Tubgcp3
-0.273747	6.58495	7.69645	0.00665748	0.42429	Uba52
0.22232	1.80891	7.81985	0.0062504	0.42429	Zbtb25
-0.27624	1.92619	7.88106	0.00605817	0.42429	Zkscan14
0.224295	2.51536	7.62671	0.00689962	0.427264	Bbs9
-0.277951	4.02128	7.51761	0.00729702	0.427264	Camk2n1
0.210084	3.00286	7.57807	0.00707392	0.427264	Ccnyl1
-0.273783	3.8548	7.56398	0.00712527	0.427264	Cebpzos
-0.301892	2.18183	7.52749	0.00726006	0.427264	Cobl
0.170275	4.06313	7.5292	0.00725368	0.427264	Cpne1
-0.186092	3.60742	7.61112	0.00695502	0.427264	Ddx49
0.221282	3.12177	7.52472	0.00727039	0.427264	Mospd2
-0.283191	3.75641	7.58874	0.00703533	0.427264	Mrps36
-0.215784	2.35207	7.52027	0.00728705	0.427264	Rabepk
0.234173	5.82374	7.57999	0.00706698	0.427264	Slc41a1
-0.240432	3.49212	7.603	0.00698404	0.427264	Snrpc
0.197521	2.70371	7.56225	0.0071316	0.427264	Tbccd1
-0.219188	4.07435	7.58347	0.00705435	0.427264	Ubald1
0.17615	4.11376	7.58442	0.00705092	0.427264	Usp12
-0.210798	3.59992	7.66013	0.00678245	0.427264	Ywhaq
-0.133132	5.3593	7.48525	0.00741939	0.428034	Arhgap10
-0.387437	1.60831	7.4803	0.0074383	0.428034	Glipr2
0.603142	7.16409	7.47501	0.00745859	0.428034	Ptgds
0.151059	4.20735	7.49659	0.00737628	0.428034	Ube2q2
-0.181705	6.20986	7.43066	0.00763075	0.435409	Cct2
-0.661681	0.64344	7.40385	0.00773684	0.435409	Scn10a
0.594471	6.45995	7.42061	0.00767033	0.435409	Scn4b
0.256506	3.83421	7.40353	0.00773809	0.435409	Znrf2
0.245074	3.67692	7.31032	0.00811905	0.444699	Dnajc27
-0.64795	2.5066	7.30664	0.0081345	0.444699	Drd2
-0.199424	6.54153	7.34986	0.00795514	0.444699	Lamb1
0.239514	3.74863	7.32272	0.00806727	0.444699	Mafg
-0.186053	7.70274	7.33391	0.00802083	0.444699	Ptrf
-0.157936	7.85544	7.32411	0.00806148	0.444699	Vdac2
-0.186269	6.50576	7.27052	0.00828766	0.447701	Actn4
-0.298586	6.1117	7.28406	0.0082299	0.447701	Mlf1
-0.289418	6.60953	7.23933	0.00842228	0.447701	Rpl41
-0.269086	7.48829	7.24982	0.00837676	0.447701	Serpinh1
0.280575	2.5782	7.24314	0.00840571	0.447701	Snx30
-0.16282	6.31679	7.25102	0.00837156	0.447701	Tufm
-0.248005	5.9866	7.19336	0.00862492	0.456369	Sfpq
-0.268189	6.99959	7.18372	0.00866807	0.456558	Rps15
-0.199085	2.50917	7.06495	0.00921836	0.464169	Asb12
-0.160132	2.6334	7.07856	0.00915349	0.464169	D11Wsu47e
-0.12628	4.5904	7.09118	0.00909376	0.464169	Eftud2
0.553282	1.89024	7.06536	0.0092164	0.464169	Fstl4
-0.215716	4.76899	7.07329	0.00917853	0.464169	Gadd45gip1
0.526602	1.33066	7.08524	0.00912182	0.464169	Gm12295
0.359936	5.07062	7.05726	0.00925522	0.464169	Grm1
-0.135447	4.30056	7.05977	0.00924315	0.464169	Pes1
0.496725	7.24808	7.12702	0.00892636	0.464169	Prune2
-0.175334	4.07751	7.09543	0.00907371	0.464169	Rrp7a
-0.17205	6.30435	7.14139	0.00886015	0.464169	Sgca
0.276797	2.87952	6.97814	0.00964351	0.465742	5930430L01Rik
0.194067	3.21883	6.99303	0.00956917	0.465742	Elac1
-0.175029	4.25032	6.97685	0.00964996	0.465742	Pmm2
-0.494398	1.47095	6.9901	0.00958374	0.465742	Ramp1
0.330749	0.581682	6.98474	0.00961049	0.465742	Snhg5
-0.243006	3.9154	6.98375	0.00961543	0.465742	Vamp8
-0.132149	7.39938	7.03258	0.00937454	0.465742	Vcp
-0.359698	1.24519	7.04199	0.00932887	0.465742	Wwox
-0.250067	2.39976	6.98203	0.00962403	0.465742	Zbtb12
0.373912	4.62906	6.94182	0.00982739	0.468426	Epn3
0.328356	2.6219	6.94878	0.00979188	0.468426	Plekhh2
-0.247819	8.36378	6.94575	0.00980732	0.468426	Tpt1
-0.210278	3.96627	6.92094	0.00993481	0.471597	Vps72
-0.197933	3.68082	6.90572	0.0100138	0.472082	Map1s
-0.131748	6.70183	6.90322	0.0100269	0.472082	Sf3b2
0.236323	3.37774	6.88669	0.0101136	0.472192	Dcun1d4
0.352329	2.0393	6.85011	0.0103083	0.472192	Dock10
-0.171296	10.1529	6.85125	0.0103022	0.472192	Eef1a2
-0.260577	3.43345	6.84871	0.0103158	0.472192	Tmem141
0.245946	4.3455	6.85606	0.0102763	0.472192	Tmem38b
-0.224475	2.31821	6.86995	0.0102022	0.472192	Tmem8
-0.30682	3.7226	6.86937	0.0102053	0.472192	Vwa1
-0.33212	2.83673	6.83141	0.0104093	0.474054	Ncam1
-0.32031	0.861731	6.78866	0.0106441	0.474054	Pdk3
-0.264115	6.12595	6.79982	0.0105823	0.474054	Rpl28
0.147466	4.69854	6.78928	0.0106407	0.474054	Ssfa2
0.449252	0.381586	6.81525	0.0104974	0.474054	Tmem194b
-0.429814	3.22817	6.79529	0.0106074	0.474054	Tnnt1
-0.29766	6.23969	6.79174	0.010627	0.474054	Tpm4
-0.125428	8.57498	6.77472	0.0107219	0.475682	Got2
0.144318	4.06278	6.75296	0.0108445	0.479277	Cdc42se1
-0.164787	4.77338	6.73752	0.0109324	0.481317	Lias
0.232892	3.1018	6.68635	0.011229	0.482266	A430046D13Rik
0.249578	4.63825	6.61864	0.0116344	0.482266	AW549877
-0.403553	4.49796	6.60729	0.0117038	0.482266	Abat
-0.144106	3.72419	6.67432	0.0112999	0.482266	C330018D20Rik
-0.141382	6.08922	6.6443	0.011479	0.482266	Capn2
0.31406	2.01107	6.63037	0.0115631	0.482266	Carf
-0.370103	5.82382	6.72048	0.0110302	0.482266	Ccnd1
-0.209956	10.4567	6.60759	0.011702	0.482266	Ckm
-0.120603	5.3678	6.60685	0.0117065	0.482266	Cops3
-0.212942	8.45856	6.68308	0.0112482	0.482266	Hspa8
0.313295	2.56277	6.65219	0.0114316	0.482266	Icosl
0.18678	5.95278	6.68602	0.0112309	0.482266	Mapt
0.247297	2.57804	6.63891	0.0115114	0.482266	Phlpp2
-0.240944	3.60769	6.63878	0.0115122	0.482266	Polr2j
0.190246	3.25275	6.69886	0.0111557	0.482266	Rcbtb1
-0.294762	6.16772	6.62068	0.0116219	0.482266	Rpl32
0.337039	2.51752	6.61652	0.0116473	0.482266	Ttll4
0.254667	2.15929	6.6678	0.0113385	0.482266	Zfp810
-0.147919	7.24787	6.49955	0.012385	0.482637	Calm1
-0.191023	4.3804	6.57211	0.0119218	0.482637	Cul7
0.371229	3.96769	6.50533	0.0123474	0.482637	Elk4
-0.130876	4.47087	6.51109	0.0123101	0.482637	Gstz1
0.422624	2.7267	6.52765	0.0122034	0.482637	Hmox1
-0.430017	0.854688	6.57618	0.0118964	0.482637	Kcnn3
-0.229985	1.82945	6.55687	0.0120176	0.482637	Mad2l2
0.295957	1.17469	6.54212	0.012111	0.482637	Mcm9
-0.227865	3.29382	6.50003	0.0123818	0.482637	Mrps10
-0.202395	8.12193	6.51652	0.012275	0.482637	Ndufv2
0.247118	3.74562	6.55729	0.0120149	0.482637	Ocrl
-0.205011	6.10384	6.49955	0.012385	0.482637	Rpl6
-0.18342	3.41518	6.58209	0.0118596	0.482637	Sap18
-0.149817	6.81773	6.53563	0.0121524	0.482637	Tcp1
-0.189817	2.66708	6.52974	0.0121901	0.482637	Vps45
0.335738	1.2743	6.54246	0.0121088	0.482637	Zfp169
-0.367189	7.65968	6.4563	0.01267	0.483112	Col1a1
-0.244789	9.69077	6.4791	0.0125189	0.483112	Gapdh
-0.185365	7.69407	6.44699	0.0127322	0.483112	Jup
-0.214891	6.42225	6.46401	0.0126187	0.483112	Klhl31
0.230767	3.12882	6.45007	0.0127116	0.483112	Mysm1
-0.329853	0.705272	6.47223	0.0125642	0.483112	Nek3
-0.148193	3.6892	6.46653	0.012602	0.483112	Zfand2a
0.266135	4.07824	6.48675	0.0124686	0.483112	Znf512b
-0.27754	2.12853	6.43737	0.0127969	0.483974	Tmtc4
0.339016	4.35356	6.4299	0.0128473	0.484294	Mlxipl
-0.192143	6.57331	6.37401	0.0132313	0.48971	Antxr2
-0.113234	5.85211	6.29718	0.013779	0.48971	Ap3d1
0.334454	1.19844	6.31563	0.0136453	0.48971	Arhgap19
0.489969	2.50055	6.34151	0.0134602	0.48971	Asb18
-0.257551	4.71969	6.28131	0.013895	0.48971	Cnn2
-0.170359	5.68084	6.28792	0.0138466	0.48971	Cops6
0.160109	7.73162	6.23731	0.0142222	0.48971	Ddx5
-0.333725	0.618963	6.23963	0.0142048	0.48971	Dzip1
-0.148821	4.02764	6.28545	0.0138646	0.48971	Eif2b2
-0.329371	2.48832	6.36423	0.0132998	0.48971	Epb4.1l3
0.302835	4.95134	6.2786	0.0139149	0.48971	F13a1
-0.457323	2.36303	6.37077	0.013254	0.48971	Gpc3
-0.250381	7.3315	6.26001	0.0140524	0.48971	Hopx
-0.171007	5.97598	6.37156	0.0132485	0.48971	Hsd17b10
0.254012	4.27253	6.34102	0.0134637	0.48971	Inpp4a
-0.13758	4.1985	6.3487	0.0134092	0.48971	Jmjd8
-0.253269	1.72909	6.24147	0.0141909	0.48971	Kctd21
0.497509	0.788051	6.29883	0.013767	0.48971	Lilrb4a
-0.191169	5.9036	6.28005	0.0139043	0.48971	Mrpl51
-0.198612	5.24533	6.36984	0.0132605	0.48971	Mrpl55
-0.199063	6.25955	6.28296	0.0138829	0.48971	Ndufb3
0.414464	1.03435	6.30024	0.0137568	0.48971	Nfam1
-0.149425	5.7624	6.25161	0.014115	0.48971	Nmt1
-0.110904	6.12122	6.35836	0.013341	0.48971	Oxa1l
-0.24171	4.85014	6.36763	0.013276	0.48971	Pfdn1
-0.289496	2.13185	6.26659	0.0140036	0.48971	Plcl1
-0.27195	3.20201	6.25975	0.0140543	0.48971	Rpf1
-0.249909	1.79101	6.37817	0.0132023	0.48971	Slc10a3
-0.396977	3.65197	6.26776	0.0139949	0.48971	Tspan18
-0.148111	5.16402	6.21887	0.0143616	0.492783	Fyn
-0.190849	7.59888	6.20865	0.0144396	0.492783	Nfib
-0.280282	2.6921	6.21065	0.0144243	0.492783	Znhit6
0.210308	2.88961	6.19922	0.0145119	0.493789	Zdhhc13
-0.238197	2.78021	6.13983	0.014976	0.495099	Abracl
-0.294401	5.42815	6.13504	0.0150141	0.495099	Anxa2
-0.315343	1.68428	6.18735	0.0146035	0.495099	Car2
-0.15418	6.40016	6.1828	0.0146387	0.495099	Copb2
-0.347324	2.15459	6.13399	0.0150225	0.495099	Cpxm1
-0.113485	6.63102	6.14065	0.0149695	0.495099	Gnb1
0.301153	1.29797	6.15094	0.014888	0.495099	Hinfp
0.256425	3.20488	6.16607	0.0147691	0.495099	Myo5a
0.202072	2.64683	6.1558	0.0148497	0.495099	Tbc1d12
0.182139	3.93456	6.15389	0.0148647	0.495099	Tbc1d2b
0.249566	5.28294	6.15176	0.0148816	0.495099	Zfp445
-0.202017	4.0149	5.67841	0.019158	0.495444	2210016F16Rik
-0.24839	3.65903	5.88338	0.0171662	0.495444	2810025M15Rik
0.331898	1.49621	5.81901	0.0177671	0.495444	6430571L13Rik
0.294525	2.99205	5.87541	0.0172394	0.495444	Aasdh
0.321368	0.472367	5.6938	0.0190003	0.495444	Agbl3
-0.123268	8.82099	5.712	0.0188155	0.495444	Ak1
-0.188548	6.70587	5.99743	0.0161534	0.495444	Arhgdia
0.258514	4.75232	5.9135	0.0168924	0.495444	Armc2
-0.309446	2.16684	6.04838	0.0157213	0.495444	Asb4
-0.1473	9.29468	6.1175	0.0151545	0.495444	Atp5c1
-0.168905	4.75898	5.83999	0.0175689	0.495444	Bcap31
-0.169895	4.58445	6.04968	0.0157104	0.495444	Bcl7b
-0.147766	6.59683	6.01307	0.0160194	0.495444	Ccni
-0.114162	6.23967	5.72124	0.0187225	0.495444	Cct5
0.182073	6.33814	5.96071	0.0164725	0.495444	Cdc37l1
0.262397	2.19001	5.76462	0.0182922	0.495444	Cep135
-0.142936	3.20324	5.92539	0.0167856	0.495444	Cinp
-0.263678	6.49681	5.85162	0.01746	0.495444	Col5a1
-0.113492	5.37756	5.75552	0.0183816	0.495444	Copg1
-0.124365	5.18805	5.75074	0.0184287	0.495444	Cops5
0.312083	3.02717	5.80698	0.0178819	0.495444	Cpeb1
-0.277391	9.43234	5.79947	0.0179539	0.495444	Cryab
-0.122091	6.89448	5.9941	0.0161821	0.495444	Dctn1
0.136642	4.51084	6.02503	0.0159178	0.495444	Dnajc18
0.125817	5.90457	5.72959	0.0186389	0.495444	E2f6
-0.126803	6.56238	5.80745	0.0178774	0.495444	Eif3c
-0.228977	2.52392	6.10779	0.0152328	0.495444	Fbl
-0.286697	5.83616	5.80466	0.0179041	0.495444	Fitm1
-0.230431	3.7879	5.74778	0.018458	0.495444	Gja3
0.17424	5.49839	5.75788	0.0183583	0.495444	Gls
0.457062	2.02751	5.85368	0.0174408	0.495444	Gstt2
0.147282	4.79166	5.78241	0.0181186	0.495444	Gtf3c2
0.173395	4.57023	6.03284	0.0158518	0.495444	Gzf1
0.13266	3.98156	5.80478	0.017903	0.495444	Hmg20a
-0.209423	9.09989	5.88487	0.0171526	0.495444	Hspg2
-0.196553	4.54323	5.68451	0.0190952	0.495444	Ict1
-0.276437	3.49866	5.69005	0.0190386	0.495444	Klf11
-0.203678	3.19079	6.0247	0.0159206	0.495444	Klhdc4
0.45173	3.16114	5.69562	0.0189817	0.495444	Klhdc7a
-0.138073	6.78766	5.90134	0.0170024	0.495444	Kpnb1
-0.199734	3.20085	5.98901	0.016226	0.495444	Kri1
0.217638	5.69107	5.80141	0.0179353	0.495444	Large
-0.214626	5.42708	6.07193	0.0155258	0.495444	Ltbp1
-0.259141	2.35117	5.96292	0.0164531	0.495444	Map10
0.127985	4.83189	5.78249	0.0181179	0.495444	Metap1
0.210644	3.98169	5.88817	0.0171224	0.495444	Mllt10
-0.264576	3.78161	5.71248	0.0188107	0.495444	Mpped2
-0.167171	5.19531	5.78904	0.0180545	0.495444	Mrpl15
-0.188823	5.96071	5.74489	0.0184866	0.495444	Mrpl18
-0.206985	4.63858	5.80871	0.0178654	0.495444	Mrps31
-0.207127	12.0171	5.9716	0.0163771	0.495444	Myl2
0.326866	1.32568	5.73428	0.0185921	0.495444	Myom3
0.341801	4.35606	5.81259	0.0178283	0.495444	Nabp1
-0.260046	7.7716	5.87723	0.0172227	0.495444	Ndufa13
-0.261795	7.20477	5.94117	0.0166449	0.495444	Ndufb7
-0.187412	7.12257	5.69764	0.0189611	0.495444	Ndufs8
-0.326	5.48584	6.02653	0.0159051	0.495444	Nes
0.146758	5.27762	5.98053	0.0162994	0.495444	Pacs2
-0.221791	3.51258	5.77119	0.0182279	0.495444	Pdgfa
0.543417	4.15463	5.8442	0.0175294	0.495444	Per3
0.352584	2.7577	5.89262	0.0170818	0.495444	Pex11a
-0.129961	3.97683	5.954	0.0165314	0.495444	Pja1
0.415377	3.29663	5.67908	0.019151	0.495444	Polq
-0.211117	3.97749	5.95253	0.0165444	0.495444	Ppic
0.247272	4.81501	5.74954	0.0184405	0.495444	Prex2
-0.150405	6.47948	5.75759	0.0183612	0.495444	Prob1
-0.139492	4.78607	5.72095	0.0187254	0.495444	Ptges3
-0.21069	4.7993	5.71686	0.0187665	0.495444	Rbm42
-0.171969	4.26225	5.67868	0.0191552	0.495444	Rcn1
-0.306646	2.5552	5.95634	0.0165109	0.495444	Rftn2
-0.208129	6.80991	5.83975	0.0175712	0.495444	Rpl7a
-0.298233	6.46027	5.98022	0.0163021	0.495444	Rps24
-0.374744	4.51624	5.77704	0.0181708	0.495444	Rps29
-0.265771	6.56968	6.04236	0.0157717	0.495444	Rrbp1
0.580984	1.65724	5.98952	0.0162215	0.495444	Sh3gl2
-0.304549	4.18077	6.07167	0.0155279	0.495444	Shb
0.264659	1.92962	5.96206	0.0164606	0.495444	Skida1
-0.193913	3.06912	5.79941	0.0179545	0.495444	Snx15
-0.205225	4.65127	6.02619	0.015908	0.495444	Ssr2
0.168261	3.61466	5.78335	0.0181095	0.495444	Suco
0.148481	3.5973	5.6744	0.0191993	0.495444	Thtpa
0.107724	5.1948	5.75133	0.0184229	0.495444	Tmem127
0.260542	5.29769	6.02165	0.0159464	0.495444	Tmem144
-0.0976047	4.4433	5.84337	0.0175372	0.495444	Tmem167b
0.307807	1.2899	6.05513	0.015665	0.495444	Tmem241
0.177407	4.46676	5.7381	0.018554	0.495444	Tmx3
-0.251839	11.2777	5.74664	0.0184693	0.495444	Tnni3
0.161687	2.7436	5.85042	0.0174712	0.495444	Tti2
-0.115954	3.75781	5.69124	0.0190264	0.495444	Txnrd3
-0.153825	4.61789	6.03449	0.0158379	0.495444	Ube2a
-0.14492	5.96056	5.82947	0.0176681	0.495444	Ube2l3
-0.123515	4.44473	6.0142	0.0160098	0.495444	Ube2n
-0.14295	5.15973	5.84891	0.0174853	0.495444	Ubl7
0.198458	3.30182	5.91377	0.01689	0.495444	Wdr35
0.179904	3.89142	5.69296	0.0190088	0.495444	Zfp715
-0.189084	3.09486	5.87281	0.0172634	0.495444	Zfp830
-0.254145	3.00514	6.0138	0.0160132	0.495444	Zmat5
0.179992	7.61259	5.62914	0.0196719	0.496514	Art3
0.225285	3.91264	5.63161	0.0196458	0.496514	Bbx
-0.195851	4.91839	5.63203	0.0196414	0.496514	Btf3
-0.278745	7.25945	5.65985	0.0193498	0.496514	Col15a1
-0.533402	1.53061	5.64196	0.0195368	0.496514	Isg20
-0.16351	4.37863	5.62991	0.0196638	0.496514	Kdelr2
-0.291629	2.49758	5.65497	0.0194007	0.496514	Mcm2
-0.191818	4.1242	5.6211	0.0197573	0.496514	Naa10
-0.131126	5.66214	5.65285	0.0194228	0.496514	Raly
-0.310358	1.51325	5.62268	0.0197404	0.496514	Rerg
-0.296079	5.90012	5.64007	0.0195567	0.496514	Tcea3
-0.187667	2.79971	5.65304	0.0194208	0.496514	Zcchc9
-0.843728	4.11431	5.59601	0.0200311	0.49763	Angptl4
0.256529	5.05499	5.58766	0.020116	0.49763	Ciapin1
0.280668	3.18604	5.59122	0.0200775	0.49763	Cntrl
-0.127182	6.33767	5.5778	0.0202231	0.49763	Eif3b
0.234236	2.21363	5.57688	0.0202331	0.49763	Ercc6
0.334072	2.28633	5.6116	0.0198585	0.49763	Hsd11b1
-0.139685	6.73098	5.60843	0.0198923	0.49763	Psmd1
-0.264392	3.64066	5.58109	0.0201873	0.49763	Taf3
0.185312	2.66927	5.57756	0.0202257	0.49763	Tmem161b
-0.278784	11.9106	5.58726	0.0201203	0.49763	Tpm1
0.299259	0.722831	5.56531	0.0203596	0.499677	AA415398
-0.202774	2.68675	5.55912	0.0204276	0.500282	Ints12
0.194535	4.86644	5.55506	0.0204724	0.500315	Slc12a2
0.143041	3.68512	5.54957	0.020533	0.500736	Mknk1
-0.171797	4.77086	5.53275	0.0207201	0.501589	Chd3
-0.192317	3.07033	5.52504	0.0208064	0.501589	Ogfod3
0.337693	2.15515	5.52901	0.0207619	0.501589	Pla2g7
-0.262657	5.13331	5.51531	0.0209159	0.501589	Rpl11
-0.248528	3.66773	5.51827	0.0208826	0.501589	Snrpd2
-0.233169	4.09397	5.53853	0.0206556	0.501589	Tbcb
0.228616	2.68306	5.52579	0.020798	0.501589	Tmem136
0.305982	4.9464	5.51597	0.0209085	0.501589	Tulp4
-0.327188	3.12644	5.49709	0.0211226	0.505496	Wbp5
0.146194	3.67171	5.49202	0.0211805	0.505832	Mterf3
-0.147546	3.84792	5.48375	0.0212753	0.507046	Xrcc6
0.266979	1.27803	5.46161	0.0215313	0.510707	Cdc14a
0.0719794	6.05918	5.4552	0.021606	0.510707	Irak1
-0.261089	1.92344	5.45539	0.0216038	0.510707	Mir568
0.120714	3.79083	5.46419	0.0215012	0.510707	Napg
-0.156948	4.00059	5.42574	0.0219529	0.511569	Chrac1
0.455245	2.71409	5.44172	0.021764	0.511569	Dct
-0.221174	4.20321	5.43121	0.0218881	0.511569	Fdft1
-0.176472	2.53399	5.436	0.0218314	0.511569	Pigx
0.294336	4.40453	5.43288	0.0218683	0.511569	Rprd1a
0.324869	1.40023	5.42892	0.0219151	0.511569	Slc35g1
-0.251502	3.01801	5.44153	0.0217663	0.511569	Snrpa1
-0.142026	8.76533	5.40775	0.0221677	0.513462	Atp5f1
0.177786	3.0934	5.40781	0.0221669	0.513462	Cdk8
0.200397	3.44103	5.41297	0.0221052	0.513462	Rsad1
-0.184011	3.23911	5.40196	0.0222372	0.51404	Aven
0.410526	1.06174	5.37667	0.0225438	0.514937	Cd83
-0.162391	8.52208	5.37934	0.0225113	0.514937	Ctnna1
-0.155875	5.99024	5.3936	0.0223381	0.514937	Mpi
-0.162722	5.17037	5.38629	0.0224267	0.514937	Ppp1r13l
0.262223	3.97077	5.38399	0.0224546	0.514937	Stk35
0.131865	4.66271	5.38608	0.0224292	0.514937	Stk38
0.215258	4.88364	5.37081	0.0226155	0.515553	Appl2
-0.551942	1.09728	5.33099	0.0231091	0.515974	A930016O22Rik
0.117472	4.40918	5.33854	0.0230146	0.515974	Angel2
0.224439	1.83977	5.33028	0.023118	0.515974	Csgalnact1
-0.277196	0.572098	5.32964	0.023126	0.515974	Dos
-0.195575	6.47167	5.34744	0.0229039	0.515974	Drap1
-0.167697	2.61283	5.33078	0.0231116	0.515974	Dtd1
0.165387	4.81661	5.35046	0.0228664	0.515974	Fbxl20
-0.163855	7.52871	5.33174	0.0230997	0.515974	Gnai2
-0.417666	6.09798	5.34208	0.0229705	0.515974	Igf2
-0.18475	5.01286	5.33466	0.0230632	0.515974	Rab3a
0.199345	4.28239	5.36078	0.0227387	0.515974	Usp40
-0.244679	3.94788	5.32184	0.0232241	0.516166	Bpgm
0.239746	1.5161	5.32502	0.0231841	0.516166	Prpsap2
-0.11764	5.15249	5.28902	0.0236416	0.51679	Aktip
-0.196805	3.27406	5.28939	0.0236368	0.51679	Cd3eap
-0.268334	4.36571	5.29818	0.0235242	0.51679	Gpt
0.172653	2.78306	5.28794	0.0236554	0.51679	Hps3
-0.114626	5.19448	5.29537	0.0235602	0.51679	Khdrbs1
0.366829	2.13085	5.29748	0.0235332	0.51679	Kifc2
-0.292942	3.67673	5.29945	0.023508	0.51679	Mrpl52
-0.228366	2.83824	5.31203	0.0233481	0.51679	Sf3b4
-0.165382	4.80024	5.29595	0.0235528	0.51679	Wbp1
-0.339968	3.77541	5.28134	0.0237404	0.517667	Sorcs2
-0.169318	4.07374	5.27061	0.0238792	0.518198	Dnmt1
-0.119646	4.10319	5.26172	0.0239949	0.518198	Ilf2
-0.104196	6.7618	5.26219	0.0239887	0.518198	Isca1
-0.202424	4.33407	5.2587	0.0240343	0.518198	Mkrn1
0.220987	2.7061	5.2665	0.0239326	0.518198	Spire1
0.314786	0.644125	5.27593	0.0238103	0.518198	Ttc41
-0.297214	6.69033	5.24497	0.0242144	0.518298	Ptms
0.257486	3.92012	5.24464	0.0242187	0.518298	Slc45a4
-0.326125	1.60797	5.25449	0.0240893	0.518298	Spata33
-0.185937	2.61841	5.24633	0.0241965	0.518298	Zbtb21
-0.251938	2.97607	5.23452	0.0243524	0.520195	Fkbp7
0.115158	5.57196	5.20334	0.0247693	0.527147	Cisd2
0.170452	4.66966	5.20489	0.0247483	0.527147	Map4k3
0.298039	1.87736	5.17598	0.0251412	0.527266	AU021092
0.1576	2.9144	5.19253	0.0249155	0.527266	Ap4e1
-0.417904	3.10008	5.17326	0.0251785	0.527266	Col6a6
-0.152155	2.87092	5.19468	0.0248864	0.527266	Eftud1
-0.285379	1.1062	5.19559	0.024874	0.527266	Il27ra
0.393518	3.38513	5.16441	0.0253003	0.527266	Klhl34
-0.434735	3.065	5.18099	0.0250727	0.527266	Lrrc4b
0.271102	0.737817	5.16891	0.0252382	0.527266	Mtbp
-0.154427	6.46127	5.15613	0.0254148	0.527266	Mtfp1
-0.278797	6.83011	5.17341	0.0251764	0.527266	Ndufa6
0.148845	2.93488	5.16933	0.0252324	0.527266	Ppapdc2
0.121117	6.7126	5.17403	0.025168	0.527266	Scp2
-0.160946	5.40807	5.16068	0.0253518	0.527266	Stau1
-0.247016	1.91501	5.15745	0.0253965	0.527266	Top1mt
0.238713	2.8045	5.15057	0.0254919	0.527917	Rgl3
-0.472975	7.03061	5.13918	0.0256509	0.530256	Atp5k
-0.192419	2.47145	5.12921	0.0257908	0.531336	Ccdc86
-0.162719	2.68942	7.5008	0.0258044	0.531336	D10Wsu102e
-0.134077	7.92618	5.12562	0.0258413	0.531336	Reep5
0.172932	3.55971	5.03814	0.0271071	0.532902	0610030E20Rik
-0.181167	5.79997	5.06011	0.0267832	0.532902	Ackr3
-0.203817	5.58494	5.02092	0.0273638	0.532902	Actg1
-0.180734	6.6996	5.03297	0.0271839	0.532902	Bag1
0.229928	2.77896	5.00676	0.027577	0.532902	Ccdc157
-0.375705	4.02152	5.01634	0.0274325	0.532902	Cited4
-0.308523	1.00507	5.05627	0.0268395	0.532902	Cks1b
-0.27982	7.56377	5.01368	0.0274725	0.532902	Col1a2
-0.270196	8.09514	5.09756	0.0262403	0.532902	Cox5b
0.148181	2.95146	5.07463	0.0265712	0.532902	Dcun1d3
0.16845	4.9649	5.06097	0.0267705	0.532902	Dhx32
-0.26512	2.44368	5.08891	0.0263648	0.532902	Exosc1
0.111969	5.44505	5.02486	0.0273049	0.532902	Fbxo18
-0.14409	9.36542	5.07659	0.0265428	0.532902	Gnas
0.237455	1.61042	5.09084	0.0263369	0.532902	Mocos
-0.159956	3.68104	5.03392	0.0271698	0.532902	Mrpl22
-0.164467	4.69045	5.0738	0.0265834	0.532902	Naa20
-0.324722	8.4192	5.08596	0.0264073	0.532902	Ndufa4
0.203871	3.2118	5.10631	0.0261152	0.532902	Nr1h3
0.192513	4.8196	5.10927	0.0260731	0.532902	Nr2c2
-0.340643	1.08264	5.07125	0.0266204	0.532902	Opn4
-0.271037	5.21771	5.03436	0.0271632	0.532902	Pcolce
-0.214204	4.81218	5.00346	0.0276268	0.532902	Pdcl3
-0.16383	6.46473	5.02491	0.0273041	0.532902	Pkig
-0.193796	5.08896	5.04661	0.0269817	0.532902	Ppib
0.215246	3.03483	5.03653	0.027131	0.532902	Prr14l
-0.245178	1.91593	5.04777	0.0269646	0.532902	Rph3al
-0.225178	6.02959	5.0176	0.0274136	0.532902	Rpl17
-0.228304	5.51272	5.10534	0.0261291	0.532902	Rps18
-0.197062	6.00274	5.07064	0.0266293	0.532902	Rrp1
-0.126362	3.72696	5.05261	0.0268932	0.532902	Rsl24d1
0.308113	4.39329	5.07344	0.0265886	0.532902	Slc40a1
-0.0915883	4.56506	5.00641	0.0275821	0.532902	Smu1
0.151725	3.37256	5.07322	0.0265917	0.532902	Stxbp3
0.155202	5.014	5.06174	0.0267593	0.532902	Tatdn2
0.27938	1.4977	5.00967	0.027533	0.532902	Tmem116
-0.425929	1.79046	5.09878	0.026223	0.532902	Tubb4a
0.389997	2.60144	4.98978	0.0278348	0.533907	Adgre1
0.221106	7.87974	4.99527	0.0277511	0.533907	Ptpn11
-0.269764	5.35726	4.98832	0.027857	0.533907	Tinagl1
-0.216162	3.64602	4.98786	0.0278641	0.533907	Tma7
0.33788	0.464654	4.97053	0.0281301	0.534433	Acot6
0.259311	1.39176	4.983	0.0279384	0.534433	D830032E09Rik
0.255721	2.63838	4.96798	0.0281695	0.534433	Fgf9
0.343021	2.70955	4.97784	0.0280176	0.534433	Slc22a3
0.120857	6.2232	4.97588	0.0280477	0.534433	Suclg2
-0.156418	4.42196	4.9709	0.0281245	0.534433	Trmt1l
0.247463	4.10686	4.95376	0.0283901	0.534694	Dock8
-0.200816	6.07576	4.95771	0.0283286	0.534694	Edf1
-0.184225	4.19507	4.95786	0.0283264	0.534694	Gstm5
-0.125561	5.69224	4.94858	0.028471	0.534694	Mapre1
-0.192136	3.4628	4.94637	0.0285056	0.534694	Phax
-0.245392	3.13414	4.94623	0.0285077	0.534694	Polr2i
-0.104193	5.83522	4.95906	0.0283077	0.534694	Suds3
-0.298641	4.88572	4.92991	0.0287645	0.536181	Anapc13
0.174014	2.66208	4.92937	0.028773	0.536181	Arl14ep
0.243737	2.58679	4.93285	0.028718	0.536181	Cyb561d1
-0.107306	4.78187	4.93298	0.028716	0.536181	Exoc7
0.308702	4.0171	4.90129	0.0292203	0.537569	Arhgap32
-0.149504	4.54733	4.91689	0.0289709	0.537569	Cpq
-0.542208	5.03906	4.92084	0.028908	0.537569	H19
0.253902	3.61389	4.90519	0.0291577	0.537569	Paxbp1
-0.174248	5.80765	4.90455	0.029168	0.537569	Pea15a
-0.148262	6.30871	4.903	0.0291928	0.537569	Smarca4
-0.256717	8.94378	4.91519	0.028998	0.537569	Ybx1
0.222333	3.97588	4.90337	0.0291869	0.537569	Zc3h7a
-0.142125	6.49867	4.87781	0.0296001	0.539065	Adssl1
0.0956703	4.85811	4.88507	0.0294821	0.539065	Atp6v1c1
0.164888	4.168	4.87127	0.0297069	0.539065	Desi2
0.176145	3.42795	4.87745	0.029606	0.539065	Eogt
-0.302997	3.91921	4.87931	0.0295758	0.539065	Gal3st3
-0.212935	5.16078	4.88048	0.0295568	0.539065	Myh10
0.177455	4.76352	4.86463	0.0298157	0.539065	Myo9b
-0.150556	3.54158	4.86918	0.029741	0.539065	Nob1
-0.212921	3.90852	4.86743	0.0297698	0.539065	Pfdn6
0.279163	1.17235	4.87164	0.0297008	0.539065	Trerf1
-0.438838	3.9545	4.8759	0.0296314	0.539065	Ubc
-0.140545	6.24484	4.85888	0.0299101	0.539295	Abcf1
0.164741	3.98805	4.84392	0.0301576	0.539295	Gabpb2
-0.303322	2.11114	4.84615	0.0301206	0.539295	Gm166
-0.363352	2.49698	4.85575	0.0299618	0.539295	Rasgef1b
0.144841	5.64725	4.83849	0.0302479	0.539295	Rhot1
-0.262317	5.47841	4.85292	0.0300086	0.539295	Safb
-0.134226	7.66393	4.85227	0.0300193	0.539295	Sptan1
-0.0948033	5.47019	4.84051	0.0302143	0.539295	Srp68
0.141247	4.40071	4.83842	0.0302491	0.539295	Tgfbrap1
-0.301149	5.97594	4.82474	0.0304781	0.542538	Psme1
-0.111639	5.27228	4.81728	0.0306035	0.543932	Nap1l1
0.187756	2.05812	4.80222	0.0308587	0.545581	A130010J15Rik
-0.266119	2.9621	4.80313	0.0308434	0.545581	Dctpp1
-0.129044	4.99076	4.80065	0.0308855	0.545581	Timmdc1
0.267853	3.95577	4.8045	0.0308201	0.545581	Zfp346
-0.12202	5.54488	4.78877	0.0310887	0.547494	Arf4
0.486609	1.31664	4.79012	0.0310655	0.547494	Prrt2
0.142594	3.64813	4.78534	0.0311476	0.547646	1200014J11Rik
-0.289361	0.773804	4.73389	0.0320454	0.547646	1810009A15Rik
-0.243851	5.42641	4.67517	0.0331039	0.547646	2410015M20Rik
0.196549	6.09446	4.64356	0.0336892	0.547646	Adamtsl5
-0.268701	0.92472	4.67333	0.0331377	0.547646	Alyref2
0.1817	2.69876	4.68314	0.0329582	0.547646	Ap5m1
-0.22079	7.7821	4.73691	0.031992	0.547646	Bag3
-0.10715	7.81246	4.61031	0.0343165	0.547646	Calu
0.245616	1.39833	4.67352	0.0331343	0.547646	Ccp110
-0.105807	6.60363	4.64463	0.0336692	0.547646	Cdc42
-0.188195	8.77383	4.76131	0.0315636	0.547646	Chchd10
-0.128868	5.13158	4.67664	0.0330771	0.547646	Commd3
0.397744	0.448307	4.70778	0.0325116	0.547646	Cysltr1
-0.142047	5.86845	4.76173	0.0315563	0.547646	Ddx24
0.095461	4.69435	4.72075	0.0322793	0.547646	Ddx50
0.24129	5.31697	4.67953	0.0330242	0.547646	Dvl1
-0.226982	1.31734	4.71016	0.032469	0.547646	E130307A14Rik
0.332048	3.33936	4.73433	0.0320378	0.547646	E230013L22Rik
-0.17548	2.691	4.67771	0.0330574	0.547646	Eef2kmt
-0.152255	4.50571	4.63422	0.0338642	0.547646	Eif4a3
-0.173206	7.50657	4.64522	0.0336582	0.547646	Eif5a
-0.217664	5.50922	4.73264	0.0320677	0.547646	Flnb
0.20382	2.09178	4.7166	0.0323534	0.547646	Gmcl1
-0.125929	4.66154	4.74973	0.0317661	0.547646	Hars
-0.130912	6.90044	4.69713	0.0327039	0.547646	Hnrnpab
0.370217	1.36884	4.72528	0.0321984	0.547646	Htra4
-0.25653	6.13863	4.67554	0.0330972	0.547646	Igfbp4
-0.212553	6.08366	4.66783	0.033239	0.547646	Mrpl30
-0.129881	4.80777	4.69575	0.0327288	0.547646	Msra
-0.106169	4.87236	4.64963	0.033576	0.547646	Naa35
-0.277202	2.70622	4.70563	0.0325504	0.547646	Ndn
-0.37078	6.51907	4.7451	0.0318476	0.547646	Ndufa12
-0.177049	7.60842	4.65555	0.0334659	0.547646	Ndufa8
-0.213409	8.45562	4.70502	0.0325613	0.547646	Ndufb8
-0.309504	7.17892	4.72172	0.0322619	0.547646	Ndufv3
-0.281646	4.49508	4.74008	0.0319361	0.547646	Nrep
0.223896	5.78945	4.63763	0.0338001	0.547646	Ogt
-0.272234	0.965757	4.68634	0.0328999	0.547646	Paqr8
-0.137861	4.00753	4.64667	0.033631	0.547646	Pex14
-0.2105	5.26525	4.6158	0.0342121	0.547646	Pfdn5
0.221801	1.5131	4.62101	0.0341132	0.547646	Pigl
0.278771	0.962293	4.62468	0.0340439	0.547646	Polm
0.166431	3.30112	4.61068	0.0343094	0.547646	Pou6f1
-0.139042	7.01769	4.65761	0.0334276	0.547646	Ppp2r1a
-0.118184	6.84143	4.69686	0.0327088	0.547646	Psmc3
-0.146434	3.21053	4.65335	0.0335067	0.547646	Rad51d
0.160446	2.99177	4.6452	0.0336584	0.547646	Rnf170
-0.258282	4.49461	4.65849	0.0334115	0.547646	Rp9
-0.211581	6.56664	4.65562	0.0334646	0.547646	Rps11
-0.189566	3.94864	4.7177	0.0323337	0.547646	Scamp4
-0.264185	2.75823	4.72917	0.0321292	0.547646	Scrn2
0.190533	3.97843	4.61287	0.0342677	0.547646	Serinc5
-0.203317	5.18338	4.75461	0.0316806	0.547646	Sf3a1
-0.148073	3.3706	4.67012	0.0331967	0.547646	Sf3a3
0.133474	6.59094	4.61016	0.0343194	0.547646	Sf3b1
-0.294837	3.79885	4.67092	0.0331821	0.547646	Sfrp1
0.210299	7.33638	4.72919	0.0321289	0.547646	Slc6a8
0.200144	2.53624	4.62343	0.0340674	0.547646	Tk2
-0.161238	6.41005	4.61329	0.0342597	0.547646	Tmem109
-0.159142	4.97976	4.77167	0.0313835	0.547646	Tmem126a
-0.445956	1.90507	4.71328	0.0324129	0.547646	Tmem171
-0.295955	5.55364	4.77514	0.0313234	0.547646	Top1
0.164727	4.91691	4.65547	0.0334675	0.547646	Ttc19
-0.383295	3.17575	4.68147	0.0329886	0.547646	Ube2l6
-0.211505	2.94763	4.60982	0.0343258	0.547646	Upf3a
0.257137	1.38413	4.63272	0.0338923	0.547646	Usp43
0.130671	4.4425	4.63709	0.0338103	0.547646	Vps37a
-0.107497	4.20622	4.65109	0.0335488	0.547646	Zbtb17
-0.213663	4.72026	4.5942	0.034625	0.550137	Mrpl53
-0.345345	0.463434	4.59529	0.034604	0.550137	Rnd2
0.313973	1.42635	4.59738	0.0345638	0.550137	Snx29
-0.193534	5.06695	4.58749	0.0347543	0.550675	Pxmp2
0.177955	3.36851	4.5891	0.0347231	0.550675	Slc35a3
-0.203893	3.53521	4.58502	0.0348021	0.550675	R3hcc1
-0.193882	8.55463	4.58203	0.0348598	0.550833	Ldha
-0.123402	4.3745	4.57832	0.0349319	0.551217	Tjp2
0.207201	2.21975	4.57098	0.0350747	0.552037	Cdyl2
-0.184699	5.39488	4.56971	0.0350995	0.552037	Gata6
0.127139	4.78784	4.56828	0.0351274	0.552037	Gucd1
-0.151253	4.21562	4.56553	0.0351812	0.552129	Trmt5
0.239857	0.768177	4.5501	0.0354843	0.55287	2810021J22Rik
-0.134872	4.67713	4.4957	0.036576	0.55287	Aip
-0.111563	4.6128	4.46123	0.0372861	0.55287	Anapc7
-0.296183	8.61104	4.46057	0.0372999	0.55287	Col3a1
0.285531	1.95795	4.51986	0.0360869	0.55287	D930016D06Rik
-0.0850881	5.41886	4.46335	0.0372421	0.55287	Ddx23
-0.22546	1.77279	4.46711	0.037164	0.55287	Fen1
-0.120494	5.74056	4.55145	0.0354578	0.55287	Gars
-0.200338	2.14624	4.46933	0.037118	0.55287	Gpank1
-0.205794	5.92648	4.49726	0.0365441	0.55287	Hint1
-0.275066	3.19398	4.55168	0.0354531	0.55287	Hist1h4h
0.251628	3.99901	4.51984	0.0360873	0.55287	LOC102636514
-0.236133	6.10335	4.5111	0.0362634	0.55287	Lgals1
-0.13537	5.00284	4.50519	0.0363831	0.55287	Lyrm5
-0.226525	3.01417	4.50464	0.0363943	0.55287	Mad2l1bp
-0.175635	5.38972	4.51405	0.0362038	0.55287	Mrpl2
-0.18766	3.4401	4.49793	0.0365306	0.55287	Mrps11
-0.239995	4.99243	4.47318	0.0370384	0.55287	Mrps21
-0.260276	14.1393	4.46886	0.0371276	0.55287	Myh6
-0.234395	2.17661	4.52999	0.0358839	0.55287	Nrxn2
-0.163277	4.964	4.47539	0.0369926	0.55287	Nsfl1c
0.195858	2.63734	4.47423	0.0370167	0.55287	Nt5dc1
-0.111151	7.27498	4.46232	0.0372634	0.55287	Pabpc4
0.186454	3.75673	4.54426	0.0355999	0.55287	Pan3
0.310399	2.12249	4.51944	0.0360953	0.55287	Pla2g4e
0.132251	3.00488	4.51582	0.0361681	0.55287	Plekha8
0.126309	3.30092	4.4702	0.0371	0.55287	Polr3f
0.130546	5.43632	4.45878	0.0373373	0.55287	Prosc
-0.344286	1.38967	4.4943	0.0366046	0.55287	Rasd1
-0.123998	4.61825	4.46324	0.0372442	0.55287	Rbm18
-0.238055	4.00684	4.54393	0.0356065	0.55287	Rbm3
-0.202962	7.07902	4.47608	0.0369784	0.55287	Rps9
-0.284851	3.98708	4.4936	0.0366188	0.55287	S100a10
-0.115612	3.74035	4.49303	0.0366304	0.55287	Sart3
0.117036	4.6379	4.49944	0.0364999	0.55287	Sdccag3
0.166047	5.17827	4.46925	0.0371197	0.55287	Slc12a6
0.198241	2.85396	4.45903	0.0373321	0.55287	Snx25
-0.0907889	6.24464	4.55647	0.0353588	0.55287	Tmed10
0.170228	5.60265	4.48158	0.0368651	0.55287	Tnrc6a
-0.183952	3.95115	4.53377	0.0358084	0.55287	Tra2b
-0.275153	2.61537	4.54999	0.0354867	0.55287	Vkorc1
0.165128	3.26709	4.52877	0.0359083	0.55287	Zdhhc20
0.233235	3.93225	4.50908	0.0363043	0.55287	Zfc3h1
0.231259	1.59165	4.51265	0.0362321	0.55287	Zfp14
-0.128429	5.51974	4.44249	0.0376784	0.553358	Dync1i2
-0.256555	1.78154	4.43959	0.0377394	0.553358	Gfra4
-0.149216	6.40979	4.44004	0.0377299	0.553358	Lmna
0.180824	4.19399	4.4529	0.0374599	0.553358	Pex7
-0.121974	4.49872	4.44281	0.0376716	0.553358	Pgd
-0.120952	5.70428	4.43749	0.0377838	0.553358	Rpn1
0.235178	1.75125	4.43663	0.037802	0.553358	Ss18l1
-0.371893	2.00531	4.45254	0.0374676	0.553358	Tmem119
0.162401	4.85044	4.44384	0.0376499	0.553358	Xpot
0.316686	1.37053	4.424	0.0380698	0.556572	Ccdc84
0.25039	3.82653	4.41812	0.0381951	0.556992	Dcp2
-0.25071	4.19299	4.41961	0.0381632	0.556992	Utp3
-0.190631	5.12673	4.41337	0.0382967	0.557768	Mrpl34
-0.140729	3.54501	4.40721	0.0384288	0.558987	Msh2
0.247136	0.725454	4.39478	0.038697	0.559111	1600002H07Rik
-0.287379	4.28968	4.40353	0.0385081	0.559111	Aebp1
-0.150807	5.54639	4.38057	0.039006	0.559111	Akt1s1
0.189979	2.69354	4.37652	0.0390945	0.559111	Avl9
0.121868	5.11095	4.39959	0.0385929	0.559111	Coq3
0.136337	3.2905	4.3831	0.0389507	0.559111	Ddhd1
-0.128149	5.47767	4.37857	0.0390497	0.559111	Ddost
-0.107756	5.90281	4.37112	0.0392129	0.559111	Dnm2
-0.264929	4.77445	4.38161	0.0389832	0.559111	Ecm1
-0.20943	5.27066	4.37357	0.0391593	0.559111	Emilin2
0.441641	1.77355	4.39277	0.0387404	0.559111	Fyb
0.433372	1.47583	4.37171	0.0391999	0.559111	Hivep3
-0.218838	3.5313	4.37423	0.0391448	0.559111	Serpine2
-0.133459	7.2542	4.38779	0.0388485	0.559111	Smpx
0.309125	0.913683	4.37693	0.0390856	0.559111	Tnfrsf11a
-0.155798	3.28149	4.37123	0.0392105	0.559111	Tvp23b
0.329182	4.001	4.36883	0.0392633	0.559139	Zbed6
-0.165258	4.72714	4.36646	0.0393154	0.559183	Aimp1
-0.248444	3.77614	4.35989	0.0394603	0.559183	Klhl40
-0.154538	2.4646	4.36013	0.0394551	0.559183	Slc30a6
-0.179846	4.7038	4.3603	0.0394514	0.559183	Ufc1
-0.137368	3.59874	4.34626	0.0397631	0.562374	Hat1
-0.146268	5.89689	4.34536	0.039783	0.562374	Htra1
-0.144689	3.05776	4.34112	0.0398778	0.563023	Zfp282
0.291753	1.44458	4.29148	0.0410043	0.563598	4732491K20Rik
0.130766	4.38951	4.28871	0.0410682	0.563598	Acap2
0.235995	6.73599	4.33363	0.0400456	0.563598	Atp11a
-0.25605	6.11021	4.31266	0.0405196	0.563598	Col6a3
0.176257	4.43081	4.32213	0.0403048	0.563598	Dstyk
-0.160138	2.03219	4.29157	0.0410023	0.563598	Eefsec
-0.11862	3.92082	4.30132	0.0407784	0.563598	Eif2b1
-0.14295	5.62117	4.29584	0.040904	0.563598	Higd2a
-0.276237	4.35064	4.31871	0.0403823	0.563598	Larp7
-0.309288	8.20045	4.32944	0.0401398	0.563598	Ndufb9
0.260177	0.544829	4.28837	0.0410761	0.563598	Nudt15
0.382151	1.0012	4.29705	0.0408763	0.563598	Pdgfc
-0.245269	2.38395	4.30331	0.0407329	0.563598	Pmf1
0.236529	1.98068	4.29341	0.0409598	0.563598	Polk
-0.145165	4.9545	4.2913	0.0410085	0.563598	Prpf6
-0.19385	3.12592	4.29451	0.0409347	0.563598	Psmg1
-0.118435	6.9365	4.31594	0.040445	0.563598	Rhoa
0.161329	4.23904	4.30915	0.0405995	0.563598	Rnf115
-0.101223	4.46426	4.32824	0.040167	0.563598	Sugt1
0.556656	1.54625	4.29557	0.0409102	0.563598	Syt12
-0.210973	5.43321	4.28772	0.0410911	0.563598	Tceb2
-0.175824	3.15102	4.33158	0.0400918	0.563598	Tmem98
-0.17281	3.09301	4.32161	0.0403165	0.563598	Trmt112
0.209697	1.66309	4.32642	0.040208	0.563598	Zfp446
0.245009	1.17251	4.28193	0.0412249	0.564761	Pms1
-0.377666	6.88555	4.27658	0.0413491	0.565791	Eif5b
-0.265958	0.622935	4.26204	0.0416886	0.56746	5830415F09Rik
-0.161414	4.89107	4.26855	0.0415362	0.56746	Banf1
0.375173	0.806587	4.25735	0.0417986	0.56746	Cd84
-0.28432	1.26638	4.2625	0.0416777	0.56746	Mamdc2
-0.343242	0.978516	4.25388	0.0418803	0.56746	Ptn
0.292424	0.843563	4.25246	0.0419138	0.56746	Ptpro
-0.191811	1.42729	4.25976	0.041742	0.56746	Rbm4b
0.207839	1.93603	4.25508	0.041852	0.56746	Setdb2
-0.146258	5.89414	4.26149	0.0417013	0.56746	Stub1
-0.152513	4.72719	4.24906	0.0419939	0.567878	Adprh
0.238792	0.748196	4.24687	0.0420458	0.567913	Tsga10
-0.222605	8.66365	4.2418	0.042166	0.568871	Atp5g1
-0.577219	0.82533	4.23937	0.0422237	0.568984	Atf3
0.317277	3.22142	4.22108	0.0426608	0.570873	Abca6
-0.260129	0.721349	4.22342	0.0426045	0.570873	Cep41
-0.220982	5.94079	4.22269	0.0426222	0.570873	Efnb3
0.133686	2.82052	4.22245	0.0426278	0.570873	Med7
-0.274498	0.338399	4.22227	0.0426322	0.570873	Nup35
0.220466	1.63705	4.22516	0.042563	0.570873	Sdhaf3
-0.288653	0.745791	4.21866	0.0427189	0.570988	Myl6b
-0.135754	4.72198	4.21364	0.04284	0.571157	Coro1c
-0.262556	5.74511	4.21384	0.0428351	0.571157	Rpl19
-0.188298	3.76566	4.21034	0.0429197	0.571157	Sh3bp4
0.216676	0.895167	4.20993	0.0429296	0.571157	Thumpd2
-0.13524	6.8992	4.20699	0.0430008	0.571445	Apobec2
0.172903	3.36404	4.19873	0.0432014	0.571686	Dmtf1
0.154123	5.32661	4.20092	0.0431483	0.571686	Dock9
0.195133	3.66126	4.19704	0.0432428	0.571686	Mal
-0.214374	1.3245	4.19605	0.0432668	0.571686	Rgs19
0.244193	4.12925	4.20099	0.0431464	0.571686	Ttc14
0.297626	2.8203	4.19288	0.0433442	0.572055	Uvssa
-0.248123	6.15733	4.18595	0.0435139	0.572983	Cfl1
-0.279486	2.64724	4.18763	0.0434727	0.572983	Pcbd2
-0.108624	5.06296	4.18054	0.0436469	0.574079	Cyfip1
0.120599	3.67558	4.17748	0.0437224	0.574416	Parp6
-0.203989	4.38073	4.16873	0.0439388	0.576602	Gstm7
0.415474	2.92183	4.15991	0.0441583	0.578825	Klhl33
-0.13641	4.67284	4.15247	0.0443441	0.579286	Ak2
-0.184095	8.45712	4.15261	0.0443406	0.579286	Pgam2
-0.225437	4.34296	4.15499	0.0442811	0.579286	Rcn3
-0.116942	5.39723	4.14802	0.0444556	0.580085	Sars
-0.261608	2.0584	4.14498	0.0445323	0.580388	Gar1
-0.115456	5.42408	4.1431	0.0445794	0.580388	Mrpl38
-0.181297	3.62802	4.1405	0.0446449	0.580585	Cxx1a
-0.130949	4.74437	4.1221	0.0451119	0.581496	Ddx54
0.140545	6.24569	4.12281	0.0450937	0.581496	Kat2b
-0.194519	5.41553	4.12185	0.0451182	0.581496	Mrps35
-0.205268	4.34983	4.1262	0.0450074	0.581496	Nop10
-0.202468	3.31479	4.12501	0.0450377	0.581496	Ptpn2
0.657627	2.71725	4.12327	0.0450821	0.581496	Serpina3n
0.132347	4.10289	4.12448	0.0450511	0.581496	Tmem87b
0.220523	4.47131	4.13194	0.0448615	0.581496	Zfp827
0.220062	1.98423	4.11372	0.045326	0.583522	AI317395
-0.277513	2.6626	4.10644	0.0455132	0.584133	Bdnf
0.244933	3.60984	4.10534	0.0455415	0.584133	Galnt15
-0.160057	7.36519	4.104	0.045576	0.584133	Myo18a
-0.169482	5.75258	4.10686	0.0455024	0.584133	Rpl24
-0.0955305	6.46304	4.08832	0.0459824	0.584422	2900097C17Rik
0.120765	3.27286	4.07826	0.0462451	0.584422	Ankra2
0.35549	1.56099	4.08504	0.046068	0.584422	Bend4
-0.235327	1.40411	4.09023	0.0459327	0.584422	Cbx8
-0.187386	4.76414	4.08368	0.0461034	0.584422	Cmss1
0.201667	3.12289	4.08268	0.0461297	0.584422	Crebl2
-0.286743	0.664536	4.07587	0.0463079	0.584422	Fbxl8
-0.169955	3.06351	4.08691	0.0460192	0.584422	Gm7694
-0.201208	7.30006	4.09272	0.045868	0.584422	Pcp4l1
-0.149552	6.01561	4.09194	0.0458882	0.584422	Psmd7
0.132697	3.79007	4.07717	0.0462737	0.584422	Slc30a4
0.115222	4.40376	4.08199	0.0461477	0.584422	Ss18
0.305201	0.740181	4.08132	0.0461652	0.584422	Sytl4
0.19267	6.3844	4.09646	0.0457711	0.584422	Tango2
-0.330606	1.48023	4.06773	0.0465221	0.586483	Nat8l
-0.129559	3.37642	4.06578	0.0465734	0.586489	Prps1l3
0.284801	0.687771	4.05957	0.0467376	0.586782	BC025920
0.206565	4.89725	4.05913	0.0467492	0.586782	Nktr
-0.149811	8.62156	4.06245	0.0466615	0.586782	Tpi1
-0.114558	3.82522	4.05416	0.0468813	0.5878	Scfd1
0.170203	4.09918	4.05141	0.0469544	0.588077	Zdhhc17
0.206482	2.58063	4.04397	0.0471529	0.589923	8430419L09Rik
-0.389643	2.2887	4.04206	0.0472042	0.589925	1810022K09Rik
-0.280643	1.74126	4.02937	0.0475454	0.592263	Afap1l2
-0.266371	3.80011	4.03146	0.0474888	0.592263	Apoo
0.318918	0.661462	4.02963	0.0475382	0.592263	Snhg4
-0.207485	5.54119	4.02448	0.0476775	0.593269	Rpl12
-0.105133	5.39354	4.0181	0.0478504	0.5946	Cops4
0.242032	3.69081	4.01674	0.0478876	0.5946	Etv5
-0.185565	4.33556	4.01141	0.0480328	0.595619	AI837181
-0.147696	2.48711	4.00994	0.0480729	0.595619	Srbd1
-0.155561	5.37412	4.00797	0.0481267	0.595645	Ube4b
0.175368	2.57067	4.00574	0.0481876	0.59576	Scyl3
-0.194296	4.03545	3.99693	0.0484294	0.598108	Ccnh
-0.212859	4.35024	3.98976	0.0486274	0.599621	Ift122
-0.153376	3.40736	3.98873	0.0486559	0.599621	Polr3b
0.335748	2.51111	3.97963	0.0489081	0.60045	Dgkq
-0.204489	4.27799	3.97435	0.0490555	0.60045	Fam96b
0.257707	0.458946	3.97843	0.0489417	0.60045	Lekr1
-0.163391	2.64236	3.9732	0.0490875	0.60045	Lsm8
-0.252594	5.75747	3.97579	0.0490152	0.60045	Npm1
-0.260678	4.58427	3.97552	0.0490226	0.60045	Rpl31
-0.117834	5.50069	3.98262	0.0488251	0.60045	Slc39a1
0.295846	0.811432	3.97056	0.0491614	0.600717	Pex11g
-0.215635	8.05333	3.94253	0.049952	0.602231	Actb
-0.259929	7.86736	3.95231	0.0496746	0.602231	Calr
-0.29701	3.86578	3.93845	0.0500685	0.602231	Cript
-0.122731	6.50339	3.94436	0.0499	0.602231	Hdgf
-0.282727	1.7691	3.94014	0.0500202	0.602231	Il3ra
0.345225	1.0884	3.95672	0.0495499	0.602231	Lmln
-0.146683	5.3863	3.95737	0.0495318	0.602231	Mrpl45
-0.168467	1.50381	3.94302	0.049938	0.602231	Mthfd2l
-0.12234	5.28683	3.95284	0.0496597	0.602231	Prkcsh
-0.131809	5.43077	3.94363	0.0499207	0.602231	Psma2
-0.136742	3.85502	3.95414	0.0496228	0.602231	Rnf168
0.270187	2.73812	3.93957	0.0500363	0.602231	Rnpc3
0.195567	3.35634	3.96008	0.0494553	0.602231	Slc36a1
0.143066	4.78795	3.96273	0.0493809	0.602231	Tial1
-0.36171	4.65457	3.95122	0.0497056	0.602231	Tmsb10
-0.129612	3.53192	3.93465	0.050177	0.602908	Ntan1
-0.357482	0.319844	3.93282	0.0502294	0.602909	Bean1
-0.131692	4.35727	3.93035	0.0503001	0.60313	Phrf1
-0.155543	6.59015	3.92722	0.0503899	0.60358	Pkp2
0.150624	5.18423	3.923	0.0505113	0.604406	Wdr13
-0.112187	3.94922	3.92059	0.0505808	0.60461	Mboat7
-0.236882	5.99577	3.91414	0.0507672	0.604959	Rpl22
-0.160261	4.81707	3.9149	0.050745	0.604959	Selk
-0.138372	2.8075	3.91634	0.0507034	0.604959	Utp18
-0.159844	2.66295	3.90781	0.0509506	0.605269	Crcp
0.11399	4.148	3.90811	0.050942	0.605269	Desi1
-0.180844	3.09441	3.91088	0.0508616	0.605269	Pianp
-0.121254	6.90852	3.9055	0.0510181	0.605446	Phb2
-0.24984	1.46746	3.9011	0.0511462	0.606342	Lig1
-0.256466	4.82662	3.89663	0.0512769	0.607268	Ccdc124
0.194917	4.07673	3.89281	0.0513888	0.607346	Fam135a
0.185187	6.24385	3.8943	0.0513451	0.607346	Gna12
-0.408554	1.69267	3.88795	0.0515317	0.608411	Cntfr
-0.122782	4.01973	3.88272	0.0516857	0.609606	Ythdf2
-0.137435	4.26011	3.87722	0.0518485	0.610902	Nfkb2
-0.171401	2.83072	3.87538	0.0519031	0.61092	Ppp1r21
-0.201989	1.63601	3.84773	0.05273	0.611738	3110062M04Rik
0.165578	3.59875	3.84773	0.0527299	0.611738	Als2
-0.187381	2.24314	3.85163	0.0526124	0.611738	Ankrd49
0.273078	4.84957	3.85695	0.0524526	0.611738	Bhlhe41
-0.103345	4.56055	3.84678	0.0527586	0.611738	Blmh
-0.16476	8.83268	3.8518	0.0526072	0.611738	Eef1a1
-0.318728	7.31501	3.86371	0.0522503	0.611738	Eif3a
-0.150855	2.25153	4.10014	0.0521396	0.611738	Exosc8
0.156282	3.20019	3.85635	0.0524707	0.611738	Klhl2
0.241802	1.41052	3.84923	0.0526846	0.611738	Nkrf
-0.222651	3.48522	3.84939	0.0526799	0.611738	Nop58
-0.179011	1.96562	3.85162	0.0526128	0.611738	Rhno1
-0.0867932	5.94383	3.84646	0.0527681	0.611738	Scaf1
-0.340389	5.47888	3.848	0.0527218	0.611738	Shfm1
-0.23845	7.90923	3.86493	0.0522139	0.611738	Uqcrh
-0.127196	4.32689	3.84186	0.0529072	0.612736	Prkag2
-0.155667	8.9438	3.83896	0.052995	0.613137	Aes
0.249494	3.69471	3.83398	0.0531463	0.614271	Fnbp4
-0.148336	3.10036	3.82994	0.0532693	0.614462	Sap30bp
-0.0929396	4.95563	3.83094	0.053239	0.614462	Ssrp1
-0.133988	8.13164	3.82428	0.0534423	0.615008	Fkbp4
-0.143923	5.55983	3.82316	0.0534766	0.615008	Ube2h
-0.142393	4.84481	3.82641	0.0533771	0.615008	Zhx2
-0.149216	3.30322	3.81993	0.0535755	0.615531	Sigmar1
-0.130786	4.91353	3.79407	0.0543755	0.617886	Actr10
0.729002	1.63255	3.75817	0.0555074	0.617886	Angptl7
-0.466299	5.91125	3.73835	0.0561429	0.617886	Atpif1
-0.147071	2.91263	3.76104	0.0554158	0.617886	B230354K17Rik
0.12288	4.7327	3.80496	0.0540371	0.617886	Cabin1
-0.187672	3.36559	3.71604	0.0568678	0.617886	Cdc42ep2
0.128633	4.47364	3.80364	0.0540781	0.617886	Dffa
0.333803	4.7406	3.77137	0.0550881	0.617886	Dmxl2
0.0901156	3.66799	3.75361	0.0556529	0.617886	Dusp22
-0.228263	2.93884	3.79189	0.0544436	0.617886	Enc1
0.170704	2.77849	3.78535	0.054648	0.617886	Enox2
0.319147	3.64664	3.78512	0.0546554	0.617886	Fign
-0.153338	4.48134	3.74518	0.0559231	0.617886	Flt4
-0.285104	4.16045	3.73479	0.0562581	0.617886	Fndc1
-0.18673	3.30926	3.74736	0.055853	0.617886	Galnt18
0.294817	1.2007	3.76665	0.0552376	0.617886	H2-M3
-0.159815	6.3723	3.80263	0.0541092	0.617886	Hhatl
0.104765	4.5244	3.7936	0.0543903	0.617886	Lgals8
-0.315037	8.99136	3.77448	0.0549898	0.617886	Lmod2
0.196075	3.84809	3.73557	0.0562329	0.617886	Lrrk2
0.120268	5.68239	3.79329	0.0543997	0.617886	Map3k7
-0.165284	3.523	3.76814	0.0551906	0.617886	Mdfic
-0.0945327	5.18846	3.78045	0.0548021	0.617886	Mrpl16
-0.161228	3.68754	3.77031	0.0551218	0.617886	Mrps22
0.424507	0.460027	3.71944	0.0567567	0.617886	Ms4a7
-0.102554	5.54086	3.79225	0.0544321	0.617886	Mybbp1a
-0.215609	5.65449	3.72643	0.056529	0.617886	Myl6
0.215446	2.74943	3.78115	0.0547799	0.617886	Nab2
-0.199303	2.79469	3.78639	0.0546155	0.617886	Nans
-0.152245	4.81076	3.74011	0.0560862	0.617886	Ndrg1
-0.134157	3.63878	3.71762	0.0568163	0.617886	Nop2
-0.307155	0.762825	3.75749	0.0555289	0.617886	Ntf3
0.233604	3.3463	3.78435	0.0546795	0.617886	Nudt12
0.212182	4.86085	3.71724	0.0568288	0.617886	Nxf1
-0.296725	3.47318	3.79361	0.0543899	0.617886	Olfml3
0.245736	4.6457	3.71545	0.0568873	0.617886	P2ry1
0.17993	5.14242	3.7791	0.0548443	0.617886	Pcmtd2
-0.238602	0.621326	3.72633	0.0565322	0.617886	Pdzd4
0.454799	2.86308	3.71779	0.0568106	0.617886	Pfkfb1
-0.153395	5.86068	3.72554	0.056558	0.617886	Pitpnc1
-0.102533	4.89706	3.719	0.0567712	0.617886	Ppp2r5d
-0.0904423	4.70237	3.79326	0.0544007	0.617886	Ptk2
-0.117355	4.8448	3.73802	0.0561537	0.617886	Rap1gds1
0.106726	4.37034	3.7343	0.0562737	0.617886	Rasa3
-0.14557	3.17002	3.74083	0.0560629	0.617886	Rbm19
-0.25008	1.69121	3.80676	0.0539813	0.617886	Rfc4
-0.185717	7.0405	3.7188	0.0567777	0.617886	Rhob
-0.158962	5.37329	3.75454	0.0556232	0.617886	Rps6
-0.213469	5.62664	3.71664	0.0568485	0.617886	Spag7
0.187187	7.12373	3.72284	0.0566459	0.617886	Spag9
0.129612	5.88386	3.7466	0.0558774	0.617886	Stk40
0.195372	1.83779	3.73776	0.056162	0.617886	Styx
-0.120382	4.8436	3.75425	0.0556324	0.617886	Tmed2
-0.139889	3.07496	3.76861	0.0551754	0.617886	Tmem104
-0.285598	3.65666	3.76424	0.055314	0.617886	Tubb6
0.127876	4.67431	3.72577	0.0565504	0.617886	Wdr37
0.397431	1.2779	3.7184	0.0567908	0.617886	Zbtb37
-0.188557	1.17946	3.75247	0.0556892	0.617886	Zfp59
-0.207129	5.79793	3.7122	0.0569937	0.617991	Dpt
-0.205633	4.36387	3.7116	0.0570133	0.617991	Manf
-0.0896694	3.85757	3.71025	0.0570577	0.617991	Plrg1
-0.126425	4.57245	3.70493	0.0572326	0.618879	Hgs
0.18838	3.21715	3.7045	0.057247	0.618879	Zfp945
-0.101919	4.30131	3.6961	0.0575244	0.620715	Bub3
-0.159415	2.72071	3.69698	0.0574953	0.620715	Mcm7
0.239421	0.659028	3.69287	0.0576316	0.621291	4933421O10Rik
-0.258911	1.66582	3.68791	0.0577965	0.622486	Praf2
-0.130534	2.94832	3.6849	0.0578969	0.622594	Commd7
-0.180207	8.20885	3.68206	0.0579917	0.622594	Cox7b
-0.107799	6.29526	3.68218	0.0579875	0.622594	Ctdnep1
0.25967	5.54228	3.68114	0.0580224	0.622594	Egfl7
-0.231156	5.06912	3.65012	0.0590698	0.622895	Eid1
0.200534	1.82784	3.66417	0.0585928	0.622895	G2e3
0.173767	3.40731	3.66577	0.058539	0.622895	Ganc
-0.14634	2.86898	3.67761	0.0581405	0.622895	Gtf2h2
-0.213716	1.94709	3.66048	0.0587178	0.622895	Hn1l
0.0893141	6.29197	3.65709	0.0588327	0.622895	Hp1bp3
0.198958	2.85802	3.65794	0.0588039	0.622895	Iffo1
0.128285	5.13295	3.64612	0.0592061	0.622895	Insig2
0.217481	0.831056	3.67516	0.0582229	0.622895	Jade3
-0.161902	3.31656	3.66303	0.0586313	0.622895	Lpar1
-0.129205	4.59503	3.67227	0.0583199	0.622895	Mepce
-0.107064	4.07829	3.65265	0.0589837	0.622895	Ndufaf7
-0.1489	3.38583	3.6572	0.0588291	0.622895	Ngdn
-0.159888	5.65616	3.64697	0.0591773	0.622895	Pdia6
0.159139	2.94284	3.64553	0.0592266	0.622895	Pola2
-0.17762	6.02231	3.66385	0.0586038	0.622895	Rab11b
0.128604	2.57545	3.657	0.0588358	0.622895	Rnf149
-0.164472	8.31104	3.65361	0.0589508	0.622895	Slc25a11
-0.202923	1.86134	3.65961	0.0587472	0.622895	Srrd
-0.148469	2.71229	3.64615	0.0592051	0.622895	Zfp60
-0.176937	2.36373	3.64518	0.0592385	0.622895	Zfp74
0.140843	3.42557	3.64909	0.059105	0.622895	Zfp866
0.178514	4.57834	3.6434	0.0592994	0.622928	Atp11b
0.330311	1.52634	3.63849	0.0594677	0.622928	Dock2
-0.228607	7.05642	3.63946	0.0594343	0.622928	Mrpl42
0.17242	4.32015	3.63806	0.0594823	0.622928	Ric1
-0.44436	7.51611	3.63721	0.0595117	0.622928	Uqcrb
0.13518	4.63853	3.63505	0.0595859	0.623139	Tspan12
0.216143	1.32616	3.62624	0.0598901	0.623495	4921531C22Rik
0.341383	3.03287	3.63023	0.0597519	0.623495	Pisd-ps1
0.165276	4.10598	3.62907	0.0597919	0.623495	Yipf6
-0.263439	3.88733	3.62774	0.0598381	0.623495	Ypel2
-0.147851	3.41566	3.62671	0.0598737	0.623495	Zkscan5
0.202096	1.45903	3.61475	0.0602891	0.625391	Fam206a
-0.394624	4.59477	3.61546	0.0602643	0.625391	Myl9
0.139487	4.35038	3.61767	0.0601873	0.625391	Slc30a1
0.243607	0.714907	3.61481	0.0602867	0.625391	Zfp472
0.23145	2.45343	3.6067	0.0605701	0.625924	Abhd14b
-0.367045	1.45629	3.58552	0.0613172	0.625924	Cd24a
0.114915	3.12767	3.60414	0.0606598	0.625924	Ddx41
-0.177052	6.01131	3.6037	0.0606756	0.625924	Dnajb4
-0.273238	3.04817	3.59005	0.0611565	0.625924	Fas
-0.167864	6.05485	3.59414	0.0610118	0.625924	Gmpr
-0.142382	4.33595	3.58663	0.0612777	0.625924	Gphn
-0.171696	4.75254	3.59258	0.061067	0.625924	Kcnq1
-0.25953	6.32728	3.59826	0.0608668	0.625924	Ndufa1
-0.234637	1.6634	3.60487	0.0606343	0.625924	Pdia5
-0.274887	2.38334	3.58735	0.0612522	0.625924	Pnp
0.336397	0.753407	3.60986	0.0604596	0.625924	Pstpip1
0.172619	3.99853	3.59189	0.0610914	0.625924	Rad54l2
-0.253517	0.788153	3.59114	0.061118	0.625924	Rpp38
-0.191644	6.32632	3.61171	0.0603951	0.625924	Rps17
-0.173111	1.55461	3.58983	0.0611643	0.625924	Tbc1d25
-0.259183	0.820948	3.59234	0.0610754	0.625924	Zeb2os
0.42058	1.74415	3.59112	0.0611186	0.625924	Zfp369
-0.112196	5.97781	3.5828	0.0614138	0.626356	Emc10
0.235999	4.65882	3.56423	0.0620778	0.627078	Dtx3
0.183513	2.62225	3.5656	0.0620286	0.627078	Fam13c
0.297448	1.75825	3.57067	0.0618466	0.627078	Flt3l
-0.243949	6.13316	3.57036	0.0618577	0.627078	Fn1
-0.144481	6.2416	3.56778	0.0619502	0.627078	Lama4
-0.232136	2.69193	3.56537	0.0620369	0.627078	Pdlim4
0.329898	0.936481	3.56407	0.0620835	0.627078	Reps2
0.20822	1.96452	3.56537	0.0620367	0.627078	Rnasel
-0.150678	3.76953	3.57774	0.061594	0.627078	Sec11a
-0.200371	2.09502	3.57173	0.0618085	0.627078	Srgap1
-0.121996	3.8921	3.56259	0.062137	0.627078	Wash1
-0.186038	5.07014	3.57746	0.0616038	0.627078	Ywhah
-0.157774	10.515	3.53878	0.0630008	0.62796	Actn2
0.145542	4.31627	3.5511	0.0625522	0.62796	Adarb1
0.194471	2.80463	3.55127	0.0625461	0.62796	Arhgap42
0.132859	3.88103	3.53544	0.0631228	0.62796	BC030336
0.172872	2.3694	3.52872	0.0633695	0.62796	Bag4
-0.134815	3.83827	3.55841	0.0622876	0.62796	Bud31
0.198017	4.04197	3.52624	0.0634609	0.62796	Ccnt2
-0.0816927	4.38665	3.52758	0.0634117	0.62796	Cdc123
-0.18447	7.49611	3.52139	0.0636398	0.62796	Cycs
-0.253215	9.51752	3.55621	0.0623672	0.62796	Hrc
-0.217134	4.77367	3.53508	0.0631363	0.62796	Igfbp3
-0.123438	4.31717	3.52662	0.0634468	0.62796	Ilkap
-0.196796	3.49708	3.5478	0.062672	0.62796	Lsm6
0.23844	4.37627	3.54296	0.0628483	0.62796	Mdm4
0.183525	2.02746	3.52458	0.0635221	0.62796	Mettl13
-0.176751	11.5319	3.55062	0.0625695	0.62796	Myl3
0.15498	3.20603	3.5388	0.0630001	0.62796	Nfrkb
-0.103385	6.97614	3.54047	0.0629388	0.62796	Rac1
-0.2019	6.25303	3.52869	0.0633707	0.62796	Rpl23
-0.25735	3.8332	3.5239	0.0635472	0.62796	Rpl36a
-0.132896	5.54632	3.52251	0.0635984	0.62796	Snd1
-0.348739	3.36036	3.52697	0.0634338	0.62796	Ssc5d
0.162685	3.73624	3.54942	0.0626131	0.62796	Tbc1d24
-0.256283	5.05063	3.52527	0.0634968	0.62796	Uqcc2
0.195218	4.88126	3.52703	0.0634316	0.62796	Zbtb18
0.339013	0.830716	3.52467	0.0635188	0.62796	Zfp442
0.328993	0.854998	3.51791	0.0637684	0.628065	2810410L24Rik
-0.189422	1.00876	3.51669	0.0638138	0.628065	Glmn
-0.157713	4.36954	3.51884	0.0637343	0.628065	2021-09-11
0.364943	1.03549	3.5139	0.0639172	0.628546	Pisd-ps2
0.180419	3.42196	3.51109	0.0640217	0.629037	Serac1
-0.157744	3.23983	3.50282	0.06433	0.629317	Bnip1
-0.194158	2.37387	3.50671	0.0641847	0.629317	Crem
-0.108482	5.76418	3.50283	0.0643296	0.629317	Ddx1
0.154981	4.87691	3.50155	0.0643775	0.629317	Dicer1
-0.17065	5.41492	3.50431	0.0642743	0.629317	Dpysl3
0.210713	2.44983	3.50647	0.0641936	0.629317	Mrgbp
0.205923	0.977074	3.49559	0.0646011	0.630968	Ccdc14
-0.196393	5.25019	3.49145	0.0647566	0.631952	Gpx1
-0.19855	4.38175	3.47018	0.0655632	0.632079	2510009E07Rik
-0.215132	1.05254	3.45776	0.0660391	0.632079	4930577N17Rik
0.386933	3.20353	3.4534	0.0662071	0.632079	Amy1
0.1697	3.51909	3.47598	0.0653422	0.632079	Atr
-0.188156	3.27589	3.45654	0.066086	0.632079	Ccdc115
0.423137	1.20589	3.44089	0.0666913	0.632079	Ccr5
0.197097	1.53771	3.48925	0.0648395	0.632079	Cep78
-0.210031	3.54615	3.48168	0.0651256	0.632079	Cyba
-0.180233	5.29689	3.44663	0.0664685	0.632079	D8Ertd738e
-0.193187	5.74613	3.48408	0.065035	0.632079	Dbi
-0.418768	6.94106	3.47319	0.0654483	0.632079	Eln
0.168384	2.09492	3.45137	0.0662852	0.632079	Eme2
-0.202182	5.705	3.45956	0.06597	0.632079	Fam101b
0.112738	5.50143	3.47686	0.0653088	0.632079	Fam168b
0.255091	1.30765	3.46232	0.0658637	0.632079	Kbtbd11
0.138095	5.29037	3.43958	0.0667423	0.632079	Marf1
0.159203	3.60995	3.44238	0.0666337	0.632079	Mtg1
0.233434	5.64614	3.44702	0.0664534	0.632079	Ndst1
0.344214	0.353783	3.45819	0.0660225	0.632079	Olfr1396
-0.203046	1.3875	3.45535	0.0661318	0.632079	Ormdl2
-0.147564	5.00003	3.48384	0.065044	0.632079	Pdlim1
-0.161867	2.14774	3.45233	0.0662483	0.632079	Pnmal2
-0.156782	3.94531	3.4753	0.0653681	0.632079	Ppil1
-0.10728	5.45989	3.44544	0.0665146	0.632079	Psmc4
0.126018	5.43486	3.45964	0.0659668	0.632079	Rgp1
-0.188165	4.70786	3.46391	0.0658028	0.632079	Rhoj
-0.146447	4.29991	3.44164	0.0666622	0.632079	Rnf103
-0.178588	7.98882	3.44115	0.0666813	0.632079	Rpl4
-0.186221	1.89467	3.46835	0.0656328	0.632079	Rpusd2
-0.0926023	6.20843	3.4814	0.0651363	0.632079	Strap
-0.146961	2.24576	3.44458	0.0665481	0.632079	Tfb1m
-0.160853	2.92131	3.4458	0.0665007	0.632079	Tmem218
-0.495273	6.96726	3.46773	0.0656567	0.632079	Usmg5
0.135301	5.15027	3.45161	0.0662762	0.632079	Zcchc14
0.0939364	5.12726	3.44929	0.0663655	0.632079	Zfand6
-0.166379	2.29856	3.47406	0.0654151	0.632079	Zfp524
-0.19303	4.83693	3.43613	0.0668767	0.632832	Actn1
-0.154876	4.18847	3.43372	0.066971	0.633204	Hexim1
-0.238733	6.39551	3.43231	0.0670258	0.633204	Hspb1
-0.186864	2.73036	3.42298	0.0673915	0.633557	Aatf
0.407085	0.88184	3.42543	0.0672954	0.633557	Cd33
-0.0839476	5.77061	3.42923	0.0671464	0.633557	Dym
-0.155853	4.81475	3.42772	0.0672057	0.633557	Gnl1
-0.346356	3.08519	3.42296	0.0673926	0.633557	Kcne1
-0.315782	4.96938	3.42428	0.0673406	0.633557	Rpl5
-0.0912385	5.4841	3.417	0.0676274	0.634729	Atxn10
0.155756	4.61429	3.41763	0.0676024	0.634729	Plk2
0.237548	3.21232	3.41333	0.0677722	0.635571	Clec1a
-0.108849	4.39684	3.40856	0.0679612	0.636826	Spcs2
0.123486	3.1606	3.40635	0.068049	0.637131	Pigm
-0.267609	5.43271	3.40415	0.0681365	0.637433	Ptma
0.0958066	3.70183	3.40252	0.0682014	0.637523	Zfp869
-0.115952	4.63083	3.39961	0.0683177	0.637576	Nfu1
-0.160767	5.27733	3.40028	0.0682908	0.637576	Nudt19
-0.117248	5.17603	3.39602	0.0684609	0.637964	Dpf2
-0.108027	4.73631	3.39337	0.0685671	0.637964	Lmf2
-0.145354	3.36473	3.38893	0.0687453	0.637964	Nkap
-0.236208	5.36132	3.3889	0.0687464	0.637964	Nudc
0.24867	1.08223	3.3908	0.0686701	0.637964	Pot1b
0.173778	3.30983	3.38925	0.0687325	0.637964	Tmed8
-0.100581	6.21275	3.39177	0.0686312	0.637964	Ywhab
-0.151842	3.06159	3.38654	0.0688413	0.638331	Prmt10
-0.23899	1.00498	3.38117	0.0690578	0.639825	Shf
-0.418925	0.937987	3.37865	0.0691597	0.640254	Sema3a
-0.230771	4.25013	3.37627	0.0692558	0.64063	Pfdn2
0.134208	3.27977	3.36471	0.0697259	0.641275	Chst15
0.133899	3.10659	3.3661	0.0696692	0.641275	Mtmr12
-0.0841188	9.78571	3.36674	0.0696431	0.641275	Pygm
-0.173635	2.55936	3.37149	0.06945	0.641275	Sap30
0.137643	5.85463	3.3701	0.0695063	0.641275	Sidt2
-0.0825594	4.03991	3.36363	0.0697703	0.641275	Thumpd1
0.178776	3.95216	3.36799	0.0695921	0.641275	Tra2a
0.137212	4.34503	3.36851	0.0695712	0.641275	Zmym5
-0.180102	4.23556	3.36107	0.0698745	0.641722	Irf2bp1
0.270507	1.22641	3.35954	0.0699372	0.641786	Alpk1
-0.149845	4.41647	3.35056	0.0703059	0.642676	Arl3
-0.18242	4.10414	3.33722	0.0708576	0.642676	Atp6v0e
0.246043	2.49011	3.33822	0.0708161	0.642676	Cep85l
0.117171	4.84128	3.34301	0.0706178	0.642676	Coro1b
-0.211813	5.10244	3.32159	0.0715098	0.642676	Csrp1
0.12001	3.84148	3.32337	0.0714352	0.642676	D15Ertd621e
0.148184	3.41844	3.35425	0.0701544	0.642676	D430042O09Rik
-0.123643	3.1286	3.33368	0.0710049	0.642676	Dis3l2
-0.305651	1.36647	3.32577	0.0713346	0.642676	Exog
-0.121578	4.94764	3.34261	0.0706343	0.642676	Fig4
-0.159685	6.63231	3.30901	0.0720399	0.642676	Flt1
-0.186058	2.31927	3.31084	0.0719623	0.642676	Galnt16
-0.327945	3.5619	3.31904	0.071617	0.642676	Gsg1l
-0.157025	4.02639	3.31807	0.0716577	0.642676	Ino80c
0.144314	3.85282	3.34109	0.0706971	0.642676	Lats1
0.238066	2.12228	3.3517	0.0702592	0.642676	Lrp11
0.138956	3.13193	3.31105	0.0719534	0.642676	Mark1
0.248764	2.97887	3.31263	0.0718867	0.642676	Masp1
-0.381238	0.86098	3.32747	0.0712638	0.642676	Mtl5
0.28663	5.48873	3.31725	0.0716923	0.642676	Myot
0.185269	2.29033	3.31002	0.0719968	0.642676	Ophn1
-0.0905542	5.69114	3.33586	0.070914	0.642676	R3hdm4
0.195379	6.41462	3.31253	0.0718911	0.642676	Rragd
-0.188301	3.55765	3.35285	0.0702118	0.642676	Selm
-0.259112	2.92734	3.32866	0.0712142	0.642676	Sh3pxd2b
-0.121367	2.66903	3.33972	0.070754	0.642676	Slbp
0.320604	4.25859	3.3233	0.0714382	0.642676	Slc26a10
-0.12236	5.38219	3.31398	0.0718297	0.642676	Slmo2
-0.134978	3.14038	3.32636	0.0713102	0.642676	Tbl2
0.0777962	4.80471	3.31326	0.0718602	0.642676	Tmem248
-0.114799	4.26666	3.33919	0.0707758	0.642676	Trappc12
-0.295238	4.71409	3.33074	0.0711273	0.642676	Trp53i11
-0.130071	5.5134	3.33724	0.0708569	0.642676	Ube2g2
0.207058	7.70698	3.33503	0.0709487	0.642676	Ugp2
-0.192747	3.54707	3.32898	0.0712006	0.642676	Utp14a
0.448089	1.30744	3.33762	0.0708411	0.642676	Zc3hav1l
-0.274425	2.16195	3.30626	0.072156	0.642718	Hspb3
-0.177545	3.23519	3.30673	0.0721363	0.642718	S100a13
0.191726	2.31691	3.30159	0.0723543	0.643491	BC005561
-0.104319	5.91253	3.30211	0.0723319	0.643491	Mrpl4
-0.123171	4.83756	3.29075	0.0728164	0.644115	Adrm1
-0.118975	3.51138	3.29612	0.0725869	0.644115	Brip1os
0.143053	3.82786	3.29122	0.0727962	0.644115	Ccdc93
0.161078	1.54025	3.28506	0.07306	0.644115	Dzip1l
-0.186637	2.891	3.28827	0.0729224	0.644115	Ebp
-0.107806	4.99148	3.29413	0.0726718	0.644115	F11r
-0.0952249	8.49115	3.28529	0.0730503	0.644115	Gpi1
-0.221738	2.67741	3.28537	0.0730469	0.644115	Mad1l1
-0.202584	1.94729	3.29556	0.0726108	0.644115	Mettl1
-0.279676	3.77708	3.29212	0.0727575	0.644115	Naa38
-0.244152	1.34236	3.29546	0.0726153	0.644115	Nme4
0.0971138	5.50853	3.28426	0.0730947	0.644115	Npr2
-0.139562	3.01777	3.27951	0.0732991	0.645219	Sil1
-0.121859	3.93852	3.27875	0.0733318	0.645219	Txndc12
-0.188235	2.76057	3.27146	0.0736466	0.646018	Cdr2
0.252521	1.50938	3.2743	0.0735237	0.646018	Cntnap1
0.184871	4.61582	3.27233	0.073609	0.646018	Csf1r
-0.162532	5.04068	3.27229	0.0736109	0.646018	Mcee
0.256296	2.29781	3.2649	0.0739313	0.647065	Dzip3
0.141767	3.82647	3.2657	0.0738964	0.647065	Slc30a7
0.132191	4.40779	3.26483	0.0739343	0.647065	Tmem150a
-0.124567	4.54329	3.26226	0.0740462	0.647553	Apoa1bp
-0.132311	6.26898	3.26083	0.0741084	0.647607	Nucb1
-0.115597	5.75896	3.25927	0.0741768	0.647714	Grb2
-0.122972	4.74643	3.25698	0.0742767	0.648095	Rdh14
-0.128591	3.73586	3.25413	0.0744013	0.648118	Dkc1
-0.186443	9.68709	3.25179	0.0745041	0.648118	Eno3
-0.122107	5.34745	3.25312	0.0744456	0.648118	Ltbp3
-0.247696	4.17136	3.25237	0.0744783	0.648118	Rpl36al
0.346406	1.38577	3.24848	0.0746495	0.648477	Ahrr
-0.209951	5.40667	3.24794	0.0746732	0.648477	Ezr
-0.235138	5.00907	3.24701	0.074714	0.648477	Pdap1
-0.228296	3.1457	3.24496	0.0748041	0.648545	Cfap36
-0.114627	2.91093	3.24428	0.0748342	0.648545	Cwc25
-0.113033	3.98	3.24032	0.0750089	0.648689	Crtc3
-0.219727	1.83902	3.23577	0.0752102	0.648689	Gm6548
-0.212322	8.19708	3.23483	0.075252	0.648689	Ndufb10
0.249209	1.04585	3.23718	0.0751478	0.648689	Nfkbiz
-0.159533	4.72189	3.23595	0.0752021	0.648689	Plod3
-0.218399	2.95114	3.24159	0.0749528	0.648689	Prdx4
-0.157487	4.50469	3.23812	0.075106	0.648689	Tceb1
-0.268659	0.875277	3.23373	0.0753008	0.648689	Tg
-0.179324	3.51157	3.23139	0.0754048	0.64871	Dap
-0.0935448	5.18296	3.23114	0.0754157	0.64871	Pofut2
-0.238619	6.31032	3.22872	0.0755236	0.649092	Ogn
-0.146479	3.06109	3.22761	0.0755726	0.649092	Utp11l
-0.200825	4.63201	3.22565	0.0756601	0.64936	Mrpl54
-0.128059	3.80888	3.22188	0.0758286	0.650322	Akr1e1
0.229918	2.86031	3.21922	0.0759476	0.650477	Ddx26b
-0.260705	6.12379	3.2182	0.0759931	0.650477	Hsp90aa1
-0.10598	5.62463	3.2177	0.0760159	0.650477	Rheb
0.283555	1.72718	3.21543	0.0761176	0.650864	S100pbp
-0.121193	4.20033	3.21334	0.0762116	0.651186	Mrpl21
0.267291	2.23902	3.20772	0.0764646	0.651787	C3ar1
0.194337	3.80251	3.20839	0.0764344	0.651787	Clk4
0.19077	5.43607	3.21	0.0763619	0.651787	Dock6
-0.253891	2.06275	3.20551	0.0765644	0.651787	Tceal1
-0.334059	11.9556	3.20568	0.0765568	0.651787	Ttn
-0.263086	4.0477	3.20268	0.0766922	0.652393	Ccrn4l
-0.140908	6.76235	3.20084	0.0767759	0.652624	Slc25a20
-0.191633	0.48115	3.19786	0.0769111	0.652673	9130019O22Rik
0.2127	0.928392	3.18403	0.0775418	0.652673	A730017L22Rik
-0.294858	0.761439	3.19438	0.0770693	0.652673	Angptl6
-0.106674	4.60377	3.18914	0.0773079	0.652673	Ccdc127
0.180712	2.2218	3.18897	0.077316	0.652673	Cdkl2
0.273517	0.970683	3.18086	0.0776871	0.652673	Ddb2
-0.196257	7.50318	3.18682	0.0774139	0.652673	Eng
0.265158	0.494478	3.18885	0.0773213	0.652673	Hdc
0.155537	6.47159	3.18567	0.0774665	0.652673	Mllt6
-0.0941751	4.85307	3.19055	0.0772437	0.652673	Mrps30
0.120388	3.95043	3.19281	0.0771406	0.652673	Nudt13
0.271922	4.78329	3.18225	0.0776233	0.652673	Pnisr
-0.125973	4.78249	3.18511	0.0774924	0.652673	Rpl7l1
0.268591	2.2441	3.18998	0.0772698	0.652673	Smim4
-0.110745	2.8204	3.19744	0.0769301	0.652673	Tut1
-0.199273	0.576768	3.18119	0.0776718	0.652673	Zfp119a
0.176437	2.96794	3.17963	0.0777438	0.652675	Amer1
-0.206423	5.50756	3.17325	0.0780375	0.653238	Akap12
-0.23511	4.65968	3.17496	0.0779586	0.653238	Ephb1
0.155165	4.03351	3.17433	0.0779878	0.653238	Fam49b
-0.164373	5.11618	3.17461	0.0779745	0.653238	Pmp22
-0.0921121	6.44953	3.17105	0.0781389	0.653613	Clptm1
0.178898	4.53689	3.16261	0.0785298	0.654427	Bach1
-0.1186	3.86633	3.1653	0.0784051	0.654427	Fam89b
0.126168	5.5941	3.16635	0.0783567	0.654427	Kansl3
-0.103526	4.92954	3.16284	0.0785193	0.654427	Lrrc59
-0.224491	2.30495	3.16161	0.0785767	0.654427	Mgmt
-0.222497	3.94157	3.16297	0.0785132	0.654427	Nsa2
-0.185435	4.62698	3.15778	0.078755	0.655439	Spsb1
-0.100626	3.36178	3.15587	0.0788436	0.655704	Ube2w
-0.0845678	5.87648	3.15339	0.0789598	0.656197	Cct6a
0.232407	1.10361	3.14779	0.0792219	0.656391	A830080D01Rik
-0.187755	5.1445	3.14578	0.0793162	0.656391	Cacybp
-0.278389	2.08672	3.14952	0.0791408	0.656391	Efhd1
0.217383	5.92647	3.14912	0.0791593	0.656391	Fam168a
-0.236934	1.41005	3.14501	0.0793522	0.656391	Klhl32
0.191279	4.41705	3.14323	0.0794363	0.656391	Mgst1
0.0781819	7.13392	3.14197	0.0794953	0.656391	Mprip
-0.177215	7.15497	3.1508	0.079081	0.656391	Ndufa11
0.235469	2.22333	3.14199	0.0794943	0.656391	Nfatc4
-0.203941	3.02344	3.11195	0.0809224	0.656428	2700029M09Rik
0.15353	2.52546	3.13681	0.0797389	0.656428	Akna
-0.144493	2.3463	3.1129	0.0808771	0.656428	Ccdc137
0.23538	6.27757	3.12831	0.0801416	0.656428	Cp
-0.158685	4.6435	3.12404	0.0803443	0.656428	Crtap
0.225814	1.53158	3.13427	0.0798587	0.656428	Fancm
0.121433	5.29517	3.14015	0.0795811	0.656428	Fbxl3
-0.163561	4.1736	3.12116	0.0804817	0.656428	Gipc1
0.160301	3.22719	3.13213	0.0799601	0.656428	Helb
-0.273243	2.45074	3.12871	0.0801224	0.656428	Igsf10
-0.13084	6.17244	3.11318	0.0808636	0.656428	Maged1
0.209866	1.64196	3.13488	0.0798301	0.656428	Mansc1
-0.181504	5.77541	3.11276	0.0808837	0.656428	Mtdh
0.225035	6.27268	3.11637	0.0807107	0.656428	Nr1d2
-0.129587	3.23246	3.13741	0.0797102	0.656428	Pdzd11
-0.102533	5.62883	3.12056	0.0805103	0.656428	Ppa2
-0.105582	4.83834	3.11461	0.0807948	0.656428	Prmt5
-0.169056	4.62754	3.12148	0.0804666	0.656428	Psmb3
-0.147983	5.03274	3.11203	0.0809186	0.656428	Rabgap1l
-0.659471	1.46807	3.11394	0.080827	0.656428	Sbk2
-0.0984167	3.27033	3.13831	0.0796681	0.656428	Sde2
0.117079	5.69393	3.11515	0.0807694	0.656428	Sypl
-0.23529	3.92098	3.11877	0.080596	0.656428	Tgfb1i1
-0.316095	1.17652	3.11458	0.0807965	0.656428	Tmem108
-0.136586	4.33793	3.12388	0.0803521	0.656428	Triobp
-0.325057	1.58284	3.1092	0.0810549	0.656579	Mcm5
-0.173059	2.41255	3.10983	0.0810245	0.656579	Pgm3
0.204866	6.31911	3.10474	0.0812694	0.657393	Pdzd2
0.156191	4.16957	3.1059	0.0812134	0.657393	Reep1
0.233634	1.18878	3.10156	0.0814231	0.658033	Hsf4
0.232061	3.35748	3.10074	0.0814626	0.658033	Slc22a23
-0.115245	3.92798	3.09504	0.0817388	0.65842	Fam175b
-0.158657	2.68655	3.09692	0.0816478	0.65842	Fcf1
0.115454	8.40769	3.09805	0.0815932	0.65842	Ghitm
-0.158612	4.63658	3.09586	0.0816993	0.65842	Ola1
0.200038	3.60633	3.08969	0.0819989	0.65981	Dock4
0.225798	4.32332	3.08914	0.0820258	0.65981	Xpo6
-0.145735	2.76663	3.08518	0.082219	0.660443	Evc2
-0.119288	3.28898	3.08584	0.0821869	0.660443	Obfc1
-0.155296	5.55832	3.08196	0.0823764	0.660445	Crispld2
0.131347	3.15151	3.0812	0.0824138	0.660445	Esco1
0.176982	5.89827	3.07933	0.0825055	0.660445	Limd1
0.110758	4.05493	3.08338	0.0823073	0.660445	Senp2
-0.163454	4.09047	3.07955	0.0824944	0.660445	Wdr43
0.133222	3.45279	3.07456	0.0827399	0.660707	6330416G13Rik
0.215078	3.37796	3.07513	0.0827118	0.660707	Arap2
-0.141939	4.88147	3.07251	0.0828407	0.660707	Cnn3
-0.181185	6.42488	3.07167	0.082882	0.660707	Cox7c
-0.241001	1.24264	3.07398	0.0827681	0.660707	Crnde
-0.645779	1.95602	3.07654	0.0826422	0.660707	Eps8l1
-0.0889308	5.2596	3.06883	0.0830222	0.661287	Eif2b5
0.148407	4.18913	3.06787	0.0830693	0.661287	Snx2
0.112176	4.3806	3.06514	0.0832043	0.661449	Fastkd2
-0.222956	6.42723	3.06591	0.0831665	0.661449	Ppp1r3c
-0.160854	2.96359	3.06043	0.083438	0.66285	Ddx28
-0.144408	8.72282	3.05802	0.0835576	0.663343	Sod2
-0.0944888	3.46632	3.03159	0.0848835	0.664035	Atg10
0.268458	5.32372	3.05182	0.0838667	0.664035	Bhlhe40
0.26793	1.11762	3.04062	0.0844278	0.664035	Bmx
-0.343743	1.85532	3.04046	0.084436	0.664035	Cryba4
-0.0852093	6.83825	3.03344	0.0847897	0.664035	Gdi2
-0.1127	5.98438	3.05395	0.0837605	0.664035	Gltscr2
0.250712	1.33834	3.04208	0.0843545	0.664035	Kctd7
-0.196178	1.17414	3.03822	0.0845485	0.664035	Mcm8
-0.112238	5.32323	3.03234	0.0848455	0.664035	Mrpl50
-0.291512	7.32682	3.02972	0.0849779	0.664035	Ndufa5
0.220338	0.910949	3.04922	0.0839965	0.664035	Pi4k2b
0.183337	5.95778	3.02992	0.0849679	0.664035	Ralgapa1
0.118161	4.51448	3.03418	0.0847527	0.664035	Rin2
-0.428294	2.24554	3.03112	0.084907	0.664035	Rpl14-ps1
-0.0756966	6.07173	3.03388	0.0847677	0.664035	Rtn3
-0.325194	1.73152	3.04525	0.0841954	0.664035	Sdf2l1
-0.148479	3.33769	3.04343	0.084287	0.664035	Sema4b
-0.156466	3.5397	3.02984	0.0849718	0.664035	Sf3b6
-0.155764	4.589	3.02877	0.0850265	0.664035	Sub1
-0.0986569	5.61824	3.03982	0.0844684	0.664035	Thra
0.205649	0.649661	3.04142	0.0843876	0.664035	Tyw5
-0.2083	4.40564	3.04338	0.084289	0.664035	Upf2
0.211561	2.3916	3.03123	0.0849019	0.664035	Zfp52
0.14576	4.3047	3.03283	0.0848209	0.664035	Zfp710
-0.288786	5.54199	3.02713	0.0851094	0.664234	Rpl21
0.226777	1.84133	3.0187	0.0855381	0.665042	Akap17b
0.194372	2.74098	3.02393	0.0852718	0.665042	Anks3
-0.20537	4.27942	3.02128	0.0854066	0.665042	Fkbp10
-0.142898	2.05481	3.0197	0.0854871	0.665042	Med6
0.132696	4.20636	3.01604	0.0856742	0.665042	Mtmr1
-0.143963	2.93314	3.02203	0.0853689	0.665042	Polr2d
0.182145	6.25578	3.01636	0.0856578	0.665042	Tfdp2
0.16208	4.66606	3.01721	0.0856142	0.665042	Ubn2
-0.229826	3.39176	3.01341	0.0858087	0.665638	Col16a1
-0.204411	1.35165	3.01032	0.0859672	0.666419	Gm4980
0.259409	0.867101	2.99782	0.0866111	0.666487	9830147E19Rik
0.215849	2.63184	3.00816	0.0860781	0.666487	Adcyap1r1
0.214421	1.68773	3.00266	0.0863608	0.666487	Arhgap28
-0.170219	5.78406	3.00019	0.0864886	0.666487	Dhrs3
-0.158714	6.10247	3.00025	0.0864852	0.666487	Metap2
-0.112935	3.69446	2.99824	0.0865891	0.666487	Mtif3
0.280313	1.86898	2.99913	0.0865431	0.666487	Myo19
0.411486	7.99291	2.99781	0.0866116	0.666487	Neat1
0.17793	3.10821	2.99988	0.0865046	0.666487	Pip4k2a
0.262184	3.6574	2.99798	0.0866029	0.666487	Sec31b
-0.15461	2.78539	2.99971	0.0865133	0.666487	Tfpt
-0.100449	5.45335	2.97981	0.0875481	0.66686	Ap2b1
0.0975318	4.906	2.99179	0.0869235	0.66686	Cnot7
0.201239	1.65814	2.97882	0.0875997	0.66686	Eml5
-0.220375	2.38151	2.97872	0.087605	0.66686	Emp3
-0.242127	1.47691	2.97879	0.0876014	0.66686	Faap20
-0.16474	2.47088	2.98783	0.0871294	0.66686	Gtf2ird2
0.105161	4.43913	2.98928	0.0870542	0.66686	Jak2
0.13206	4.81199	2.99575	0.0867181	0.66686	Kmt2b
0.233576	5.96589	2.9798	0.0875485	0.66686	Lyz2
0.152609	4.01081	2.97871	0.0876057	0.66686	Metap1d
0.196575	3.98484	2.97963	0.0875574	0.66686	Mturn
0.312906	0.522619	2.978	0.0876427	0.66686	Pcdhb14
-0.113228	6.57109	2.98355	0.0873524	0.66686	Pdia3
0.0845872	6.06787	2.98888	0.0870747	0.66686	Rnf14
-0.16827	6.26038	2.98344	0.0873584	0.66686	Syne1
-0.278363	3.78314	2.99076	0.086977	0.66686	Tubb2a
0.0937809	4.405	2.98065	0.0875041	0.66686	Wdr48
0.184136	8.43132	2.97497	0.0878021	0.667631	Hadhb
0.163515	2.76388	2.97294	0.0879085	0.667669	Spopl
0.133412	5.69221	2.97267	0.0879228	0.667669	Srsf6
-0.209616	6.3631	2.96813	0.088162	0.668166	Jund
0.262698	3.85058	2.96918	0.0881064	0.668166	Luc7l
0.351117	4.71518	2.96969	0.0880795	0.668166	Scn4a
-0.15701	3.81507	2.96455	0.0883507	0.669157	Wdr83os
-0.271331	3.148	2.94356	0.0894684	0.672487	Csrp2
-0.30418	1.65344	2.94901	0.0891765	0.672487	Ddc
-0.0960886	8.45748	2.9418	0.0895629	0.672487	Fndc5
-0.150439	4.05057	2.94643	0.0893144	0.672487	Gtf2h5
0.129232	4.83943	2.94497	0.0893925	0.672487	Mmab
-0.189198	3.4523	2.9435	0.0894713	0.672487	Mxra7
-0.0894597	5.09038	2.95228	0.0890021	0.672487	Ndel1
-0.211467	6.54205	2.95066	0.0890884	0.672487	Ndufc2
0.181714	1.80456	2.9413	0.0895894	0.672487	Nim1k
-0.360937	0.708708	2.94704	0.089282	0.672487	Pdzrn4
0.242544	1.92068	2.9524	0.0889956	0.672487	Slc7a2
-0.431345	2.67551	2.95201	0.0890165	0.672487	Slit2
-0.137017	4.61102	2.94191	0.0895565	0.672487	Srsf4
-0.102893	5.39959	2.94098	0.0896066	0.672487	Tmco1
0.150063	2.79968	2.93643	0.0898514	0.673447	Casp7
-0.134988	5.69739	2.93712	0.0898141	0.673447	Gorasp2
-0.169534	1.98737	2.93304	0.0900341	0.673889	Cnpy4
0.120011	3.81415	2.93209	0.0900856	0.673889	Fbxo45
0.208465	7.03575	2.93412	0.089976	0.673889	Kremen1
0.190807	3.77834	2.92975	0.0902121	0.674398	Fam208a
-0.0939646	5.03136	2.92731	0.0903438	0.674946	2021-09-09
-0.153403	4.17916	2.92604	0.0904127	0.675023	Lamtor2
0.157849	5.29521	2.9246	0.0904908	0.675169	Dgkd
-0.249058	0.861088	2.91921	0.0907844	0.675328	4930526I15Rik
-0.202691	8.02801	2.91474	0.0910282	0.675328	Atp5j2
0.201862	5.92148	2.92107	0.0906829	0.675328	Cpeb3
0.179905	3.79457	2.9155	0.0909867	0.675328	Dgke
-0.145085	4.44667	2.91474	0.0910281	0.675328	Dusp16
0.272456	4.11529	2.91441	0.0910458	0.675328	Ebf1
0.194236	3.66025	2.91631	0.0909425	0.675328	Pigg
-0.195383	7.93515	2.91347	0.0910976	0.675328	Rplp0
0.108837	3.16006	2.9193	0.0907792	0.675328	2021-09-10
0.196169	2.64336	2.91615	0.0909509	0.675328	Trim16
0.137335	3.90447	2.91106	0.0912296	0.675872	Patz1
-0.155539	2.85493	2.90425	0.091603	0.678203	Cxx1c
-0.124658	8.37194	2.90275	0.0916856	0.678379	Map7d1
-0.133201	3.81529	2.89615	0.09205	0.680639	Vps18
-0.395756	0.646939	2.89447	0.092143	0.680658	Racgap1
0.241068	6.10115	2.89397	0.0921706	0.680658	Ralgapa2
-0.139127	3.11743	2.89156	0.0923041	0.681208	Sars2
0.145229	2.65532	2.8892	0.0924355	0.681305	Abhd6
-0.185011	7.05185	2.8898	0.0924019	0.681305	Rpsa
-0.161039	3.06185	2.88268	0.0927987	0.683442	Dcaf4
-0.163329	2.92068	2.88123	0.0928794	0.683442	Ears2
-0.0962151	4.60309	2.8808	0.0929031	0.683442	Glod4
-0.0873548	5.05991	2.87435	0.0932647	0.684356	Arl1
-0.094169	5.98618	2.87459	0.0932513	0.684356	Cops7a
-0.233564	2.54476	2.8749	0.0932337	0.684356	Nme6
-0.13683	4.14657	2.87685	0.0931242	0.684356	Znhit1
-0.103095	5.21114	2.86808	0.0936171	0.684764	Atp1b3
0.179909	4.96795	2.86867	0.093584	0.684764	L2hgdh
-0.152644	5.04985	2.86831	0.0936044	0.684764	Robo4
-0.190205	5.91156	2.8718	0.0934077	0.684764	Swi5
0.16868	2.98671	2.86987	0.0935165	0.684764	Tmem110
0.267631	2.50495	2.86627	0.0937191	0.684844	Atp8a2
0.125516	3.0728	2.86578	0.0937468	0.684844	Ing5
-0.115086	4.94237	2.86392	0.0938517	0.685177	Akr1b10
-0.174686	2.57459	2.86169	0.0939778	0.685338	Ndufaf6
-0.169057	4.1426	2.86143	0.0939926	0.685338	Taf10
-0.105822	3.74183	2.85925	0.0941163	0.685807	Ube2e1
0.224241	0.835199	2.85371	0.0944308	0.686797	Eif5a2
-0.380775	2.45174	2.85489	0.0943636	0.686797	Nrn1
0.119464	6.83904	2.85407	0.0944106	0.686797	Zc3h7b
-0.200556	3.26516	2.79275	0.0979709	0.686852	1700040L02Rik
-0.212119	5.17723	2.73454	0.101489	0.686852	2700060E02Rik
0.288469	0.624094	2.72324	0.102187	0.686852	9330133O14Rik
0.164228	5.99038	2.73671	0.101355	0.686852	Abca2
-0.115533	2.69313	2.79146	0.0980471	0.686852	Abt1
0.200889	1.61602	2.7302	0.101756	0.686852	Accs
0.121484	2.70858	2.73313	0.101575	0.686852	Acd
0.199438	4.90381	2.84452	0.0949551	0.686852	Acsf2
-0.246436	3.49529	2.78861	0.0982166	0.686852	Aldh1b1
0.3499	1.43376	2.80119	0.0974721	0.686852	Aldh1l1
0.130906	5.24136	2.74868	0.100621	0.686852	Aldh5a1
0.216764	3.79501	2.83307	0.0956133	0.686852	Als2cl
0.123625	4.1137	2.82584	0.0960313	0.686852	Ankrd13c
-0.344024	5.40198	2.84836	0.094736	0.686852	Anp32b
-0.152286	2.7329	2.79674	0.0977349	0.686852	Apba1
0.260072	1.68403	2.75036	0.100519	0.686852	Arhgap9
-0.594679	2.59588	2.73907	0.10121	0.686852	Arntl
0.274601	0.547778	2.79907	0.0975969	0.686852	Arntl2
0.108168	5.99413	2.73131	0.101688	0.686852	Brd2
-0.101895	5.18312	2.78261	0.0985736	0.686852	Camk2g
0.17295	2.78074	2.80776	0.0970855	0.686852	Casp8ap2
-0.140734	3.27064	2.73876	0.101229	0.686852	Ccdc53
-0.0918467	3.75533	2.72241	0.102239	0.686852	Ccdc71
-0.0985154	6.99267	2.76976	0.0993438	0.686852	Cd151
-0.109145	2.87689	2.79907	0.0975972	0.686852	Cdkn2aipnl
0.228059	0.392122	2.75841	0.100029	0.686852	Chic1
0.325721	1.49975	2.76546	0.0996029	0.686852	Chkb
-0.0686905	4.54249	2.74171	0.101047	0.686852	Cnot8
0.123856	3.92526	2.84218	0.0950894	0.686852	Cog3
-0.190814	8.25973	2.80341	0.0973414	0.686852	Cox6b1
0.291973	2.69764	2.8217	0.0962717	0.686852	Cybb
-0.233854	1.62954	2.72965	0.101791	0.686852	Dcaf12l1
0.152397	4.93513	2.78629	0.0983547	0.686852	Dip2b
-0.121535	4.70371	2.83614	0.0954365	0.686852	Eif2a
-0.112969	5.10691	2.74958	0.100566	0.686852	Eif3g
0.124888	5.31652	2.73794	0.101279	0.686852	Etnk1
0.325562	0.420107	2.84613	0.0948631	0.686852	Fam105a
-0.20689	2.64754	2.77418	0.0990783	0.686852	Fam133b
0.161352	2.89617	2.76941	0.099365	0.686852	Fam76b
0.122685	4.75137	2.83095	0.0957357	0.686852	Fbxl5
0.115835	2.84831	2.76052	0.0999017	0.686852	Fbxo34
-0.121206	3.61836	2.76416	0.099681	0.686852	Fer
0.159248	3.97318	2.76593	0.0995746	0.686852	Gba2
0.219283	0.948993	2.81055	0.096922	0.686852	Gcfc2
0.16666	3.619	2.78638	0.098349	0.686852	Gclm
-0.161551	5.24555	2.80603	0.0971874	0.686852	Gsta4
-0.157408	4.98517	2.73939	0.10119	0.686852	Gstk1
-0.153754	4.69842	2.74999	0.100542	0.686852	H2afv
-0.217451	1.91932	2.81095	0.096899	0.686852	Hmga1
-0.202777	2.51784	2.76968	0.0993488	0.686852	Igip
-0.134002	2.16774	2.82998	0.095792	0.686852	Iqcb1
-0.212569	3.36552	2.78658	0.098337	0.686852	Itpa
0.166342	9.53131	2.80859	0.0970369	0.686852	Ivns1abp
0.140221	3.53733	2.72726	0.101938	0.686852	Jmjd4
-0.12973	5.90962	2.73562	0.101422	0.686852	Klhl41
-0.196952	1.13945	2.80805	0.0970685	0.686852	Leng9
0.1972	1.23165	2.77851	0.0988184	0.686852	Llph
-0.146585	3.2127	2.75612	0.100168	0.686852	Magoh
0.100021	5.06163	2.82228	0.0962382	0.686852	Man2b1
-0.27657	0.980975	2.81017	0.0969447	0.686852	Map9
-0.143286	2.72433	2.75609	0.10017	0.686852	Med26
0.280508	2.44313	2.75996	0.0999353	0.686852	Met
-0.202196	7.69536	2.78617	0.0983617	0.686852	Mgll
0.121014	3.79645	2.82849	0.0958782	0.686852	Mocs2
-0.171004	4.96383	2.82358	0.0961624	0.686852	Mrps15
-0.137856	4.7419	2.75945	0.0999666	0.686852	Mrps2
-0.167996	6.76665	2.79183	0.0980251	0.686852	Myh14
-0.193379	4.65841	2.72567	0.102037	0.686852	Myl12b
0.101721	5.38774	2.78155	0.0986369	0.686852	Ndufaf4
-0.549517	3.84357	2.81604	0.096601	0.686852	Ndufb4
-0.208515	7.18855	2.73662	0.101361	0.686852	Ndufs6
-0.155323	4.30307	2.81795	0.0964899	0.686852	Nosip
-0.1313	5.28504	2.74417	0.100897	0.686852	Osgepl1
0.19333	4.33145	2.72757	0.101919	0.686852	Papd5
-0.174549	3.34371	2.82672	0.0959801	0.686852	Plcg2
-0.172355	8.07138	2.82111	0.0963057	0.686852	Plec
-0.259092	0.765651	2.83097	0.0957346	0.686852	Plk3
-0.238832	3.12938	2.74344	0.100942	0.686852	Podxl2
-0.209427	1.78123	2.7969	0.0977249	0.686852	Ppp1r26
-0.227803	1.69233	2.8031	0.0973596	0.686852	Ppp1r3f
-0.0997823	7.78358	2.74163	0.101052	0.686852	Prkaca
0.191473	3.65163	2.80209	0.0974187	0.686852	Prkg1
-0.158705	2.37144	2.80627	0.0971732	0.686852	Prkrip1
-0.112451	6.1441	2.73034	0.101748	0.686852	Psmc1
-0.132049	3.95169	2.83205	0.0956719	0.686852	Ptcd1
0.173071	1.64904	2.7987	0.0976189	0.686852	Qtrt1
0.156665	2.73693	2.83883	0.0952816	0.686852	Rassf2
0.10363	3.41804	2.7357	0.101417	0.686852	Rhbdd1
-0.142308	3.02581	2.82238	0.0962321	0.686852	Rnf217
-0.217601	6.37552	2.73373	0.101538	0.686852	Rpl13
-0.179398	4.15508	2.84107	0.0951528	0.686852	Rpl27
-0.20145	5.11703	2.77185	0.0992182	0.686852	Rpl37
-0.683264	0.539655	2.8002	0.0975301	0.686852	Rpl37rt
-0.166677	7.47243	2.74334	0.100948	0.686852	Rpl8
-0.263342	2.82044	2.80942	0.0969884	0.686852	Rpp25l
-0.213881	5.47067	2.72793	0.101897	0.686852	Rps12
-0.304029	5.74907	2.75345	0.10033	0.686852	Rps26
-0.167774	5.95771	2.72294	0.102206	0.686852	Rps7
0.133598	3.54972	2.7942	0.0978847	0.686852	Rusc1
0.179964	4.88829	2.74721	0.100711	0.686852	Secisbp2l
0.133714	4.32857	2.75699	0.100115	0.686852	Sestd1
-0.0949336	5.41601	2.84033	0.0951953	0.686852	Sf3b3
0.119676	3.52362	2.76913	0.0993817	0.686852	Sfmbt1
-0.169911	1.66519	2.77948	0.0987607	0.686852	Sfxn4
0.241212	1.54498	2.76565	0.0995911	0.686852	Shtn1
0.211175	5.82072	2.79399	0.097897	0.686852	Slc25a42
0.217004	3.80375	2.7236	0.102165	0.686852	Slc4a7
0.210262	5.81912	2.76538	0.0996075	0.686852	Smg1
-0.174562	4.15159	2.78583	0.0983815	0.686852	Smim12
-0.139592	6.17358	2.79511	0.0978311	0.686852	Snx3
0.089513	5.22228	2.78415	0.0984817	0.686852	Snx5
-0.142209	2.50961	2.77223	0.0991949	0.686852	Spats2l
0.212043	1.42008	2.78614	0.0983635	0.686852	Syngap1
0.142567	2.63619	2.78266	0.0985708	0.686852	Thnsl1
0.0900101	6.65595	2.7257	0.102035	0.686852	Trap1
0.0972634	4.21803	2.76066	0.0998929	0.686852	Trim3
0.158605	5.24587	2.83572	0.0954605	0.686852	Trpm7
-0.0843007	5.92113	2.72999	0.101769	0.686852	Tspyl1
-0.174491	4.24839	2.84913	0.0946919	0.686852	Txndc17
0.18947	4.07855	2.7319	0.101651	0.686852	Uhrf1bp1
-0.0906807	5.87745	2.78531	0.0984127	0.686852	Usp4
0.186421	2.82569	2.77612	0.0989616	0.686852	Usp45
-0.0866659	3.63542	2.7808	0.0986815	0.686852	Vwa9
-0.136734	2.735	2.84831	0.0947388	0.686852	Wdr74
0.187281	4.66499	2.82771	0.095923	0.686852	Ypel3
0.203912	1.44828	2.75799	0.100055	0.686852	Zbtb48
0.210662	1.84671	2.82109	0.0963069	0.686852	Zfp280c
0.182955	2.82533	2.84992	0.0946466	0.686852	Zfp862-ps
-0.181106	1.81892	2.72892	0.101835	0.686852	Znhit3
-0.321697	0.792649	2.84651	0.0948416	0.686852	Zxda
-0.438392	17.6075	2.74345	0.100941	0.686852	__alignment_not_unique
-0.0941087	4.4806	2.72009	0.102383	0.686991	Capn1
-0.134546	5.64076	2.71921	0.102438	0.686991	Cops2
-0.163267	5.90932	2.72	0.102389	0.686991	St13
0.15551	4.18091	2.71781	0.102525	0.687176	Ankrd32
-0.1358	2.58325	2.71025	0.102998	0.688072	A630072M18Rik
-0.215554	3.24062	2.70723	0.103187	0.688072	Bcl7c
-0.230275	6.03971	2.7111	0.102944	0.688072	Bola3
0.176414	2.36746	2.71344	0.102798	0.688072	Cep95
0.152205	6.69026	2.71032	0.102993	0.688072	D5Ertd579e
-0.282838	3.75682	2.70685	0.103211	0.688072	Errfi1
-0.197789	1.15365	2.70777	0.103153	0.688072	Gm5860
-0.154313	5.5624	2.706	0.103264	0.688072	Gpr157
0.112354	4.18644	2.71159	0.102914	0.688072	Kdm3a
-0.138379	4.24139	2.70519	0.103315	0.688072	Nkiras1
-0.179553	7.27552	2.70974	0.10303	0.688072	Rpl13a
0.139877	2.81205	2.6998	0.103655	0.688347	Cstf3
-0.245614	2.30067	2.70182	0.103527	0.688347	Olfm1
-0.122302	6.78711	2.70063	0.103602	0.688347	Pcbp1
-0.155865	7.28718	2.70188	0.103524	0.688347	Tsc22d4
-0.143748	4.71563	2.70145	0.103551	0.688347	Zc3h15
-0.464539	4.12475	2.69587	0.103903	0.688895	Alas2
0.121094	5.1424	2.69565	0.103917	0.688895	Brwd1
-0.193105	3.44304	2.69615	0.103885	0.688895	Daam2
0.256698	0.490873	2.67021	0.10554	0.689929	Ang
-0.11576	2.87976	2.64433	0.107221	0.689929	Arl6ip6
-0.0919836	4.31344	2.65618	0.106448	0.689929	Atic
-0.206308	1.8182	2.6817	0.104803	0.689929	B3gnt9
-0.350781	6.63981	2.64306	0.107304	0.689929	Bdh1
-0.226761	0.383937	2.65273	0.106672	0.689929	Bmp7
-0.100862	5.21458	2.65114	0.106775	0.689929	Bri3bp
-0.159183	2.15024	2.65666	0.106417	0.689929	Ccdc28b
-0.370227	3.65882	2.63068	0.108119	0.689929	Cebpd
-0.215357	7.4699	2.65797	0.106331	0.689929	Cox8b
-0.0809856	4.63868	2.65875	0.10628	0.689929	Cpsf3
-0.119156	5.54834	2.67567	0.105189	0.689929	Crybg3
-0.10667	3.07461	2.62294	0.108632	0.689929	Csnk2a2
-0.0784183	5.29085	2.62947	0.108199	0.689929	Degs1
-0.0797212	8.87962	2.64486	0.107186	0.689929	Dlst
-0.209469	5.20835	2.62364	0.108586	0.689929	Dusp8
-0.154298	6.26128	2.66637	0.105788	0.689929	Eef1d
-0.209645	2.24985	2.6399	0.107511	0.689929	Egfr
-0.0842897	3.74486	2.65605	0.106456	0.689929	Ercc5
-0.0990546	3.75703	2.63372	0.107918	0.689929	Fam104a
0.210904	0.705416	2.63283	0.107977	0.689929	Gemin6
0.184618	4.22828	2.62519	0.108482	0.689929	Gramd1a
0.106315	4.11116	2.62249	0.108662	0.689929	Hgsnat
-0.20624	4.47194	2.63344	0.107937	0.689929	Hist1h2bc
-0.201657	5.33763	2.62868	0.108251	0.689929	Hnrnpd
0.123835	3.73464	2.68112	0.104841	0.689929	Impact
0.190026	3.80864	2.63664	0.107726	0.689929	Kansl2
0.13226	2.53401	2.67756	0.105068	0.689929	Kctd6
0.143226	5.85254	2.64513	0.107168	0.689929	Kidins220
-0.138426	2.75446	2.67054	0.105519	0.689929	Lage3
-0.143083	7.76852	2.62452	0.108527	0.689929	Lamc1
0.64142	9.13323	2.64662	0.107102	0.689929	Lars2
-0.275406	0.839029	2.68849	0.104371	0.689929	Lgi3
-0.110121	5.88191	2.64943	0.106887	0.689929	Lgmn
-0.193379	5.29801	2.66213	0.106062	0.689929	Loxl1
-0.0911549	6.36102	2.63186	0.108041	0.689929	Mapre2
-0.146422	6.32407	2.6755	0.105201	0.689929	Mpc1
0.235397	4.40007	2.67078	0.105503	0.689929	Mrs2
-0.0855984	5.3949	2.63986	0.107514	0.689929	Ncaph2
-0.152346	3.4967	2.63233	0.10801	0.689929	Ndufaf5
-0.115979	7.25627	2.64418	0.10723	0.689929	Nid1
-0.162187	2.75281	2.6474	0.10702	0.689929	Nol12
-0.163758	5.50993	2.63898	0.107572	0.689929	P4ha1
-0.125841	7.16508	2.68655	0.104494	0.689929	P4hb
-0.0692843	4.61465	2.62736	0.108339	0.689929	Pafah1b2
-0.100912	6.62415	2.68046	0.104883	0.689929	Parvb
-0.114249	3.89377	2.65788	0.106337	0.689929	Pex11b
0.131345	4.94286	2.64322	0.107294	0.689929	Pik3c2b
0.182031	2.0859	2.6273	0.108343	0.689929	Qtrtd1
0.199808	1.0418	2.66421	0.105927	0.689929	Rabl2
0.214228	1.4067	3.60095	0.107091	0.689929	Rmnd1
-0.112091	4.68644	2.63592	0.107773	0.689929	Rnf181
-0.208086	4.97107	2.6664	0.105785	0.689929	Rps16
-0.175407	5.83462	2.64458	0.107205	0.689929	Rtn2
-0.131839	3.8203	2.65809	0.106324	0.689929	Sdhaf1
0.134772	4.30376	2.68775	0.104418	0.689929	Sephs2
0.261974	3.98953	2.62283	0.108639	0.689929	Setbp1
0.241139	0.886954	2.65688	0.106402	0.689929	Slc38a6
-0.274746	0.40665	2.66205	0.106067	0.689929	Slc52a3
0.154899	2.78173	2.65276	0.10667	0.689929	Smyd5
-0.233837	1.6249	2.67483	0.105243	0.689929	Snrnp35
-0.0943448	6.13073	2.66185	0.10608	0.689929	Srpr
-0.188449	2.87923	2.62954	0.108194	0.689929	Sssca1
-0.164387	5.932	2.62674	0.10838	0.689929	Sulf2
-0.207014	1.3754	2.65958	0.106227	0.689929	Tdrkh
0.282662	6.69557	2.66542	0.105849	0.689929	Tef
-0.114485	3.67762	2.66293	0.10601	0.689929	Tsr1
-0.0883546	3.00993	2.65792	0.106334	0.689929	Tsr2
0.102248	5.86292	2.63658	0.10773	0.689929	Ttc7b
-0.132798	6.66884	2.66143	0.106107	0.689929	Ube2m
-0.105022	3.51248	2.6819	0.10479	0.689929	Wdr61
-0.1752	6.78906	2.6879	0.104408	0.689929	Ybx3
0.219842	1.74661	2.66527	0.105859	0.689929	Zfp182
0.169098	2.89933	2.63914	0.107561	0.689929	Zfp597
0.165559	1.54837	2.63816	0.107626	0.689929	Zfp709
-0.12207	2.41755	2.65036	0.106827	0.689929	Zfyve19
0.0970972	4.42569	2.62225	0.108678	0.689929	Zzz3
-0.150184	2.49848	2.61949	0.108862	0.690716	3110040N11Rik
-0.107132	2.79506	2.61727	0.10901	0.691054	Cdc26
-0.155417	2.56161	2.61689	0.109035	0.691054	Pdcd2
0.242367	1.30223	2.61297	0.109297	0.692336	Cxxc4
0.161359	5.18569	2.6064	0.109738	0.694743	Rasal2
0.453097	1.60825	2.60487	0.10984	0.695012	Rasl10a
0.270096	5.01942	2.60167	0.110056	0.69578	Cpeb2
-0.188095	3.28217	2.60128	0.110082	0.69578	Dusp28
-0.172763	3.92765	2.59797	0.110306	0.696437	Gpr153
0.127691	5.60361	2.59796	0.110307	0.696437	Map2k3
-0.143164	2.93932	2.59428	0.110556	0.697627	Cep131
0.16132	6.38301	2.59334	0.110619	0.697646	Scarb2
-0.145879	5.52156	2.58672	0.11107	0.697893	Cltb
-0.145914	2.202	2.58558	0.111147	0.697893	Cnnm4
-0.131446	6.48069	2.58141	0.111432	0.697893	Cox7a2l
0.16551	1.12347	2.58153	0.111424	0.697893	E2f5
0.248844	2.40734	2.58816	0.110971	0.697893	Hpgd
-0.118183	12.8526	2.58788	0.110991	0.697893	Mb
-0.156706	2.62888	2.58473	0.111205	0.697893	Mcm6
-0.308442	1.55645	2.58122	0.111445	0.697893	Myc
-0.0986909	4.9699	2.58399	0.111256	0.697893	Ptcd2
-0.0796214	5.39469	2.59016	0.110836	0.697893	Rnf40
-0.224089	6.81522	2.58349	0.11129	0.697893	Rpl18a
-0.1799	2.795	2.59067	0.110801	0.697893	Rsph3a
0.13385	4.74887	2.58777	0.110998	0.697893	Usp16
-0.11038	7.60194	2.57895	0.111601	0.698488	Vegfb
-0.10214	6.40473	2.57792	0.111671	0.698547	Eprs
0.176525	1.71397	2.57457	0.111901	0.699273	Bbs7
0.158743	1.68147	2.57447	0.111908	0.699273	Tmem194
-0.145788	2.62555	2.57198	0.112079	0.699585	Ica1
0.253977	2.42223	2.57242	0.112048	0.699585	Sfi1
-0.0966794	4.46777	2.56852	0.112318	0.700694	Stt3a
-0.164388	3.54089	2.56694	0.112427	0.700995	Camk2b
-0.16384	2.45852	2.5631	0.112692	0.702271	Mzt2
-0.27836	5.19026	2.56205	0.112765	0.702343	Col5a3
0.255754	1.72329	2.5215	0.115614	0.702405	Arhgap30
-0.144302	5.77606	2.514	0.116151	0.702405	Atp6v1d
-0.0873272	3.84204	2.54677	0.113829	0.702405	Cactin
0.202955	1.62469	2.54347	0.11406	0.702405	Cd300a
-0.105802	3.46768	2.53546	0.114625	0.702405	Cept1
0.217032	4.80232	2.53904	0.114372	0.702405	Clk1
0.207779	4.40442	2.51622	0.115992	0.702405	Cmtm4
-0.180123	1.3139	2.55756	0.113076	0.702405	Cryl1
-0.181301	2.07253	2.51634	0.115983	0.702405	Dclre1b
0.204505	4.98622	2.52953	0.115044	0.702405	Dot1l
-0.209175	2.66867	2.51171	0.116315	0.702405	Dusp10
-0.0891331	4.23857	2.51614	0.115997	0.702405	Elac2
-0.207095	1.124	2.50764	0.116607	0.702405	Ercc8
-0.148349	8.37367	2.55191	0.11347	0.702405	Etfb
-0.117584	6.65065	2.54233	0.114141	0.702405	Fkbp1a
-0.104364	5.38597	2.51432	0.116127	0.702405	Hip1
0.0833299	5.90768	2.54546	0.113921	0.702405	Klc1
-0.11198	5.70747	2.50625	0.116707	0.702405	Klhdc3
0.222089	2.12915	2.52806	0.115148	0.702405	Klhl4
-0.0921489	4.32575	2.52727	0.115204	0.702405	Ldah
-0.405301	1.34541	2.53107	0.114935	0.702405	Lrp2bp
0.217142	2.57821	2.54674	0.113831	0.702405	Lrrn4cl
0.149153	2.14711	2.52961	0.115038	0.702405	Map3k12
-0.0968575	6.92249	2.55751	0.11308	0.702405	Mlf2
0.365121	2.89602	2.52903	0.11508	0.702405	Mpeg1
-0.15628	6.66163	2.54849	0.113709	0.702405	Mrpl12
-0.137442	3.32102	2.54506	0.113949	0.702405	Nagk
-0.298353	3.16353	2.54545	0.113922	0.702405	Olfml2b
0.181992	6.05928	2.53202	0.114867	0.702405	Optn
-0.0808284	5.54658	2.51124	0.116348	0.702405	Osbpl1a
-0.128157	3.97212	2.54062	0.114261	0.702405	Ostc
-0.178377	3.97108	2.51789	0.115872	0.702405	Phyhip
0.211358	2.18498	2.51283	0.116234	0.702405	Pik3cd
0.238841	0.889725	2.55188	0.113472	0.702405	Polg2
-0.118642	3.32611	2.51964	0.115747	0.702405	Pomt1
0.0901034	5.13797	2.54293	0.114099	0.702405	Ppt1
-0.162066	7.6296	2.51446	0.116117	0.702405	Prdx5
0.189342	5.27291	2.51319	0.116208	0.702405	Prkab2
-0.108862	7.52994	2.55421	0.113309	0.702405	Ptp4a2
-0.0840563	6.64673	2.56064	0.112863	0.702405	Rab1
0.148897	2.7797	2.53053	0.114973	0.702405	Reck
-0.0997483	3.15438	2.53372	0.114747	0.702405	Rfxap
-0.125782	4.37169	2.54356	0.114055	0.702405	Rwdd1
0.173651	4.88175	2.52306	0.115503	0.702405	Sema6d
0.11386	4.08894	2.50589	0.116733	0.702405	Senp5
-0.110355	6.17445	2.51061	0.116393	0.702405	Sf1
0.205349	1.17068	2.50704	0.11665	0.702405	Sh3bp2
-0.194238	3.42562	2.54958	0.113633	0.702405	Slc2a1
-0.232193	2.84443	2.55656	0.113146	0.702405	Stbd1
0.126311	3.1974	2.53653	0.114549	0.702405	Strbp
0.105718	3.79697	2.53872	0.114394	0.702405	Stxbp5
-0.175106	5.44499	2.51525	0.116061	0.702405	Tagln2
0.175164	3.10412	2.52385	0.115447	0.702405	Tbx2
-0.13491	3.42188	2.5546	0.113282	0.702405	Tcea1
0.162255	2.97728	2.52371	0.115457	0.702405	Tmem18
0.0870365	5.71878	2.51887	0.115802	0.702405	Ubl3
0.145107	2.33916	2.55274	0.113412	0.702405	Uevld
-0.142907	4.82082	2.51007	0.116432	0.702405	Vat1
-0.109884	4.96972	2.5555	0.11322	0.702405	Xpnpep1
0.148845	2.39307	2.53547	0.114623	0.702405	Zbtb5
0.19575	3.10677	2.50777	0.116597	0.702405	Zfp518a
0.197077	0.707627	2.52395	0.11544	0.702405	Zfp607
0.198378	2.68861	2.55446	0.113292	0.702405	Zfp697
-0.17755	1.01866	2.50683	0.116665	0.702405	Zfp764
0.219051	0.423639	2.51912	0.115784	0.702405	Zik1
-0.238139	4.7761	2.50504	0.116794	0.702409	Cwc15
-0.172047	2.59851	2.50167	0.117037	0.702501	Blvrb
-0.151186	9.76463	2.4975	0.117339	0.702501	Cox4i1
0.271636	2.0838	2.49787	0.117312	0.702501	Fam179a
0.104219	5.74011	2.50249	0.116978	0.702501	Fyttd1
-0.154978	2.30732	2.49911	0.117223	0.702501	Gmpr2
0.215463	3.35096	2.49691	0.117382	0.702501	Htatip2
-0.113025	4.24054	2.4984	0.117274	0.702501	Ier3ip1
-0.293926	0.962323	2.4973	0.117354	0.702501	Pin4
-0.236163	2.42916	2.4964	0.117418	0.702501	Sez6l2
-0.079671	4.11256	2.49954	0.117191	0.702501	Slc39a13
-0.172545	3.62276	2.49554	0.117481	0.702511	Taf12
0.0958364	4.72703	2.4933	0.117643	0.702689	Lyrm9
-0.10897	4.80466	2.49349	0.11763	0.702689	Mrpl43
0.280292	0.457663	2.49261	0.117694	0.702689	Snhg17
-0.328296	3.67512	2.47937	0.11866	0.703373	Ccdc55
0.198234	1.7391	2.48363	0.118349	0.703373	Cdh19
-0.109833	3.22326	2.4844	0.118292	0.703373	Cdkal1
-0.162162	4.66861	2.48323	0.118378	0.703373	Chchd1
-0.152837	4.95542	2.48343	0.118363	0.703373	Dad1
0.130163	2.49014	2.47892	0.118694	0.703373	Dapp1
-0.126902	6.69415	2.48178	0.118484	0.703373	Ehd2
-0.0950706	5.30983	2.4823	0.118446	0.703373	Fnta
-0.497486	0.471187	2.47893	0.118693	0.703373	Gm14057
0.0968332	5.44663	2.47748	0.1188	0.703373	Mink1
-0.128216	4.54875	2.47756	0.118794	0.703373	Mrpl11
-0.0917377	3.6803	2.47961	0.118643	0.703373	Mrpl48
-0.149987	3.56116	2.47955	0.118647	0.703373	Myo1e
-0.130009	5.46966	2.48252	0.11843	0.703373	Rpa1
-0.166923	5.34902	2.48875	0.117975	0.703373	Rpl15
-0.125294	5.75038	2.47686	0.118845	0.703373	2021-09-15
-0.136605	5.01128	2.48334	0.11837	0.703373	Steap3
-0.136925	3.9371	2.47517	0.118969	0.703634	Arl6ip4
-0.179441	5.03971	2.47378	0.119072	0.703634	Ifitm2
-0.106288	5.46455	2.47422	0.119039	0.703634	Wbp11
0.0849152	4.41841	2.4725	0.119166	0.703831	Shc1
0.2262	3.2115	2.47157	0.119235	0.703876	Rcor1
0.190582	3.88439	2.47043	0.119319	0.704011	Fam102b
0.175849	2.5476	2.46844	0.119465	0.704156	Skap2
0.175458	6.41567	2.46876	0.119442	0.704156	Wnk2
0.140827	2.4943	2.46672	0.119593	0.704296	Galk2
0.214025	1.17416	2.46647	0.119611	0.704296	Slfn3
-0.196806	0.493748	2.46422	0.119778	0.70492	R74862
-0.215445	4.02613	2.46241	0.119912	0.705348	Gtf2f1
-0.424016	6.40167	2.46024	0.120074	0.705937	Tfrc
-0.256343	3.14758	2.45899	0.120167	0.706126	Slit3
0.197387	0.716973	2.4578	0.120255	0.706284	2500004C02Rik
0.101937	3.17302	2.45677	0.120332	0.706377	Isg20l2
0.20706	1.92982	2.45449	0.120502	0.706835	Kcnc3
-0.0882949	4.25625	2.45408	0.120533	0.706835	Vbp1
0.113361	6.70571	2.45194	0.120693	0.707413	Fhl1
0.279938	1.08054	2.4497	0.12086	0.707676	Pik3cg
-0.102767	5.95266	2.4505	0.1208	0.707676	Psmd8
-0.156903	3.51216	2.44766	0.121014	0.708215	Ercc1
-0.130934	2.20552	2.44618	0.121124	0.708504	Lin37
-0.116976	3.39634	2.44156	0.121472	0.708519	2210016L21Rik
-0.326099	2.46506	2.44236	0.121412	0.708519	Bola2
-0.122467	2.39694	2.44483	0.121225	0.708519	Ovca2
-0.0977468	4.80253	2.44124	0.121496	0.708519	Psmd14
-0.249024	2.66091	2.44168	0.121462	0.708519	Rpf2
-0.165336	7.48833	2.44361	0.121317	0.708519	Uqcr11
-0.209115	1.85971	2.43927	0.121644	0.709026	Med31
0.187662	3.7287	2.43782	0.121754	0.709309	Spta1
-0.121903	5.53239	2.43346	0.122084	0.710514	Itga5
-0.127085	2.92125	2.43412	0.122034	0.710514	Supt3
0.199841	1.06528	2.42921	0.122406	0.71113	4930503L19Rik
-0.404396	2.39412	2.43052	0.122307	0.71113	Lmod1
-0.169678	4.8693	2.42881	0.122436	0.71113	Nedd8
-0.0854276	4.13572	2.42916	0.12241	0.71113	Rnf31
0.121141	4.07909	2.42769	0.122522	0.711267	Pias2
-0.215808	6.67626	2.42355	0.122837	0.711727	2010107E04Rik
0.208154	3.8708	2.42421	0.122787	0.711727	Fam208b
-0.0851079	4.74897	2.42341	0.122848	0.711727	Mesdc2
-0.101785	4.38194	2.42342	0.122847	0.711727	Zfp358
-0.154969	4.54496	2.42245	0.12292	0.711791	Pvrl2
-0.114607	3.3118	2.42135	0.123005	0.711922	Med8
0.118651	5.35191	2.41731	0.123314	0.712683	Dusp7
-0.214535	4.90237	2.41591	0.123421	0.712683	Epha4
0.156179	4.12608	2.41671	0.12336	0.712683	2021-03-07
0.17728	4.13413	2.4156	0.123445	0.712683	Ttc39b
-0.246089	8.03346	2.41783	0.123274	0.712683	Ucp2
[truncated: 9,537 more rows]

## Sheet: S3
Table S3: Full results of KEGG pathway analysis in males
Name	ConceptType	#Genes	Coeff	OddsRatio	P-Value	FDR	Direction	SigGenes
Parkinson's disease	KEGG	94	-0.830756	0.43572	6.79107e-10	1.23229e-07	down	12862, 67273, 67184, 66495, 56791
Oxidative phosphorylation	KEGG	99	-0.79997	0.449343	1.17361e-09	1.23229e-07	down	12862, 67273, 67184, 66495, 11964
Spliceosome	KEGG	108	-0.718848	0.487314	1.22245e-08	8.55715e-07	down	28000, 192159, 320632, 101943, 67229, 50783, 217207, 21681, 53317, 68816, 78651, 76522
Huntington's disease	KEGG	136	-0.607332	0.544803	8.15482e-08	4.28128e-06	down	12862, 67273, 67184, 67300, 66495, 71770, 14775, 12757, 16438, 15194, 14816, 20022, 433759, 19712
ECM-receptor interaction	KEGG	54	0.679361	1.97262	7.80243e-06	0.000313597	up	15530, 13138, 226519, 16773, 16777, 12835, 12830, 16410, 12829, 16782, 19699
Pathways in cancer	KEGG	202	0.381109	1.46391	8.9599e-06	0.000313597	up	226519, 16773, 16777, 18596, 16451, 11652, 26413, 12830, 12928, 20851, 18706, 26417, 16001, 11863, 17128, 12567, 14368, 22031, 216033, 16410, 12829, 58231, 17127, 21812, 18590, 14362, 12402, 13866, 12566, 19206, 433759, 80903, 14369, 20525, 16782, 23805
Insulin signaling pathway	KEGG	100	0.501763	1.65163	1.66423e-05	0.000499269	up	20411, 19084, 15277, 107746, 108079, 104215, 16337, 22084, 11652, 26413, 14251, 12928, 18706, 26417, 18607, 74370, 54611, 18679, 64930, 19268, 58988, 384783, 12402, 68961
DNA replication	KEGG	18	-1.15963	0.313603	2.71404e-05	0.000644487	down	18972, 17216
Alzheimer's disease	KEGG	122	-0.495382	0.609338	2.79955e-05	0.000644487	down	11938, 12862, 67273, 67184, 12288, 16971, 226641, 26413, 66495, 15108, 26417, 16438, 12333, 16440, 78943
Focal adhesion	KEGG	144	0.41495	1.5143	3.06898e-05	0.000644487	up	226519, 68794, 21894, 107746, 16773, 16777, 12835, 18596, 11652, 70549, 26413, 12830, 232906, 12928, 18706, 26417, 16001, 18607, 224105, 16410, 12829, 18590, 13866, 16782, 19699
Adherens junction	KEGG	52	0.633452	1.8841	4.67124e-05	0.000891783	up	20411, 16337, 19274, 26413, 26417, 16001, 17128, 216033, 17127, 21812, 19268, 13866, 19271
Ribosome	KEGG	58	-0.642975	0.525726	0.000128857	0.00225499	down	NA
Type II diabetes mellitus	KEGG	29	0.723533	2.06171	0.00035922	0.00580279	up	15277, 12288, 16337, 26413, 18706, 26417, 12291, 384783
Basal cell carcinoma	KEGG	23	0.792749	2.20946	0.000407567	0.00611351	up	14368, 14362, 19206, 14369, 23805
Arrhythmogenic right ventricular cardiomyopathy (ARVC)	KEGG	46	0.58404	1.79327	0.000436926	0.00611697	up	11938, 20191, 109620, 13138, 20541, 12288, 16773, 13405, 13506, 216033, 16410, 24052
Wnt signaling pathway	KEGG	96	0.415782	1.51556	0.000533996	0.00700869	up	93687, 26931, 208846, 16974, 17128, 103583, 26932, 81004, 67087, 14368, 17127, 14362, 20437, 14369, 23805
Phosphatidylinositol signaling system	KEGG	53	0.524573	1.68974	0.000810075	0.00987031	up	110911, 18706, 224020, 16438, 74055, 84095, 104015, 18720, 269180, 13139, 16440
Mucin type O-Glycan biosynthesis	KEGG	14	0.930504	2.53579	0.000846026	0.00987031	up	14423, 20444, 56336, 94192, 108150, 14426
Calcium signaling pathway	KEGG	79	0.428381	1.53477	0.0011124	0.012295	up	11938, 20191, 20541, 12288, 18596, 67972, 11515, 16438, 74055, 12291, 18679, 243764, 14816, 16440, 13866, 94045, 68961, 11549, 13867
Bile secretion	KEGG	30	0.651392	1.91821	0.00124335	0.0130552	up	224129, 11515, 18671, 54403, 18670, 20525, 15357, 16835
Glutathione metabolism	KEGG	32	-0.711811	0.490755	0.00136414	0.0136414	down	14775, 14874, 66073
Proteasome	KEGG	39	-0.642191	0.526138	0.00155609	0.0148536	down	NA
Drug metabolism - cytochrome P450	KEGG	17	-0.918535	0.399103	0.00180668	0.0159644	down	14874
ABC transporters	KEGG	26	0.671672	1.95751	0.00182451	0.0159644	up	11305, 17250, 18671, 27410, 18670, 76184, 26874
Inositol phosphate metabolism	KEGG	45	0.52557	1.69142	0.00191583	0.0160929	up	18706, 224020, 74055, 84095, 104015, 18720, 269180
N-Glycan biosynthesis	KEGG	36	0.566949	1.76288	0.00247525	0.0195744	up	14595, 68292, 17158, 17156, 17155, 53618, 380959, 56737, 328370, 107895
Adipocytokine signaling pathway	KEGG	47	0.502973	1.65363	0.0025167	0.0195744	up	19247, 108079, 11652, 16452, 384783, 50790, 20525
Starch and sucrose metabolism	KEGG	18	0.75843	2.13492	0.00279824	0.0197614	up	15277, 77559, 74185
Systemic lupus erythematosus	KEGG	24	-0.759345	0.467973	0.00282666	0.0197614	down	NA
TGF-beta signaling pathway	KEGG	49	0.487497	1.62824	0.0028803	0.0197614	up	26413, 26417, 17128, 17129, 75788, 17131, 17127, 21812, 58988
Metabolism of xenobiotics by cytochrome P450	KEGG	13	-0.985988	0.373071	0.00291716	0.0197614	down	14874
Colorectal cancer	KEGG	48	0.478757	1.61407	0.00380628	0.0249787	up	11652, 26413, 18706, 26417, 17128, 17127, 21812, 23805
ErbB signaling pathway	KEGG	62	0.420677	1.52299	0.00438385	0.0278973	up	11652, 26413, 12928, 20851, 18706, 26417, 224105, 11352, 58988, 12402, 13866, 13867
Chronic myeloid leukemia	KEGG	60	0.4211	1.52364	0.00499032	0.0299013	up	19247, 11652, 26413, 12928, 20851, 18706, 26417, 17128, 12567, 17127, 21812, 12402, 433759
Aldosterone-regulated sodium reabsorption	KEGG	23	0.644569	1.90517	0.00501612	0.0299013	up	16337, 26413, 18706, 26417, 18607, 384783, 110784
Glycosaminoglycan biosynthesis - keratan sulfate	KEGG	9	0.960914	2.61409	0.00512594	0.0299013	up	14595, 20444, 53618, 53625
Small cell lung cancer	KEGG	61	0.399745	1.49144	0.00741791	0.0421016	up	226519, 16773, 16777, 11652, 12830, 18706, 12567, 22031, 16410, 12829, 12566, 16782
Neurotrophin signaling pathway	KEGG	93	0.326453	1.38604	0.00815858	0.0450869	up	19247, 22628, 107746, 11652, 228026, 26413, 12928, 18706, 26417, 56484, 26406, 26408, 384783, 73086
Endocytosis	KEGG	148	0.261377	1.29872	0.0090005	0.0484642	up	98878, 67300, 52055, 106952, 19326, 71770, 347722, 16001, 12757, 215445, 75788, 54189, 78618, 17131, 52348, 78287, 18720, 70160, 17127, 21812, 12402, 13867, 212285, 216869, 16835
Endometrial cancer	KEGG	42	0.459775	1.58372	0.00940035	0.0489406	up	11652, 26413, 18706, 26417, 18607, 56484, 216033, 13866, 23805
Peroxisome	KEGG	58	-0.435449	0.646974	0.00955508	0.0489406	down	16922, 228061, 59038, 50790, 26874, 68603
Vascular smooth muscle contraction	KEGG	63	0.380033	1.46233	0.0099607	0.0498035	up	69632, 12288, 26413, 224129, 329251, 17904, 26417, 11515, 16438, 14674, 17540, 19091, 16440, 11549
Jak-STAT signaling pathway	KEGG	65	0.372731	1.45169	0.0103773	0.0506798	up	19247, 16195, 16451, 11652, 20851, 18706, 16452, 16391, 12402
Dilated cardiomyopathy	KEGG	56	0.394482	1.48362	0.0112946	0.0539059	up	11938, 20191, 13138, 20541, 12288, 16773, 13405, 224129, 11515, 16410, 24052
Melanogenesis	KEGG	54	0.399621	1.49126	0.0116062	0.0541624	up	14678, 26413, 224129, 26417, 11515, 14368, 14679, 14362, 14369, 13190
Salivary secretion	KEGG	35	0.482478	1.62008	0.0122737	0.0560321	up	224129, 67972, 11515, 16438, 20496, 19091, 16440, 11549
Amoebiasis	KEGG	53	0.398347	1.48936	0.0126773	0.05663	up	226519, 16773, 16777, 12830, 18706, 12829, 16782
Toxoplasmosis	KEGG	73	0.343401	1.40973	0.012944	0.05663	up	226519, 14678, 16773, 16777, 16451, 11652, 228026, 26413, 18706, 26417, 66513, 16452, 14679, 16782, 16835
Homologous recombination	KEGG	11	-0.898703	0.407097	0.0136839	0.0570136	down	18972
Ubiquitin mediated proteolysis	KEGG	111	0.281251	1.32479	0.0137907	0.0570136	up	13194, 17237, 28000, 14897, 22192, 12211, 15204, 17222, 100763, 103583, 75788, 93765, 67345, 109161, 56791, 20437, 69807, 12402, 68729, 140629
Regulation of actin cytoskeleton	KEGG	129	0.262552	1.30024	0.0138462	0.0570136	up	69632, 18596, 26413, 50884, 232906, 12928, 18706, 26417, 224105, 14674, 243764, 16410, 18720, 18590, 80903, 231637, 23805
Hedgehog signaling pathway	KEGG	21	0.588464	1.80122	0.0152646	0.0616456	up	93687, 103583, 19206
Pyrimidine metabolism	KEGG	62	-0.389206	0.677595	0.0166003	0.0657749	down	50493, 76952, 20022, 18972, 67065, 70408, 218832, 230718
RNA polymerase	KEGG	21	-0.653382	0.520283	0.0170692	0.0663803	down	20022, 67065, 70408, 218832
Alanine, aspartate and glutamate metabolism	KEGG	20	0.576356	1.77954	0.0206206	0.0785969	up	14661, 14660, 214579, 268860
mRNA surveillance pathway	KEGG	59	-0.384186	0.681005	0.0209592	0.0785969	down	26931, 26932, 51786, 21681, 20220
Metabolic pathways	KEGG	637	-0.127156	0.880597	0.0221586	0.081637	down	76722, 12862, 11636, 67273, 15107, 15277, 77559, 18472, 110911, 13026, 14661, 75612, 14423, 14595, 13435, 66495, 15531, 54616, 15108, 68292, 224020, 11717, 14660, 74185, 214579, 211347, 17158, 74055, 20444, 230027, 76952, 17156, 228061, 17155, 72727, 11964, 14874, 56219, 84095, 104015, 19714, 54128, 53618, 69080, 18720, 380959, 77697, 269180, 20397, 77626, 78752, 110695, 18563, 13139, 69574, 5362…
Circadian rhythm	KEGG	20	0.564895	1.75926	0.0235741	0.0849076	up	103583, 50789
RNA transport	KEGG	108	-0.279234	0.756363	0.023855	0.0849076	down	217869, 19386, 218210, 73192, 227720, 227699, 72322, 21681, 26905, 20220, 223921
Pancreatic cancer	KEGG	54	0.35663	1.42851	0.0253136	0.0885977	up	16451, 11652, 26413, 18706, 26417, 17128, 12567, 17127, 21812, 13866
Cytosolic DNA-sensing pathway	KEGG	24	-0.559968	0.571227	0.0299977	0.102287	down	67065, 70408, 218832, 22040
Antigen processing and presentation	KEGG	30	-0.501599	0.605562	0.0304074	0.102287	down	12330, 19141
Carbohydrate digestion and absorption	KEGG	16	0.597922	1.81834	0.0306862	0.102287	up	15277, 11652, 18706
MAPK signaling pathway	KEGG	160	0.209115	1.23259	0.0313259	0.102788	up	68794, 12288, 18596, 11652, 26413, 12928, 19043, 26417, 224105, 76089, 26406, 26408, 12291, 18015, 66513, 13714, 58231, 26405, 21812, 18590, 80903, 216869, 73086, 13198
Hypertrophic cardiomyopathy (HCM)	KEGG	54	0.342365	1.40827	0.0321852	0.103983	up	11938, 20191, 13138, 20541, 12288, 16773, 108079, 13405, 16410, 24052
Nucleotide excision repair	KEGG	32	-0.477797	0.620148	0.0333738	0.106189	down	13194, 18972
Retinol metabolism	KEGG	7	-0.94245	0.389672	0.0367088	0.115057	down	NA
Tyrosine metabolism	KEGG	16	-0.6453	0.524505	0.0393791	0.121612	down	14874, 67011, 13190
Base excision repair	KEGG	17	-0.623273	0.536187	0.0406978	0.123863	down	16882, 235587, 18972
Porphyrin and chlorophyll metabolism	KEGG	22	-0.54838	0.577885	0.0418222	0.125467	down	14319, 77697
Pancreatic secretion	KEGG	39	0.371154	1.44941	0.046402	0.137245	up	11938, 20191, 224129, 67972, 11515, 16438, 20496, 54403, 16440
Arachidonic acid metabolism	KEGG	18	-0.581407	0.559111	0.0502066	0.146436	down	14775, 12408
T cell receptor signaling pathway	KEGG	60	0.296888	1.34566	0.0523152	0.149244	up	11652, 228026, 26413, 18706, 26417, 13383, 224105, 12567, 12402
Histidine metabolism	KEGG	12	-0.696134	0.498509	0.0525908	0.149244	down	110695, 67011
mTOR signaling pathway	KEGG	41	0.351965	1.42186	0.0537258	0.150432	up	108079, 22084, 11652, 12283, 26413, 29869, 18706, 26417, 18607, 74370, 64930, 58988, 72149
Glycosphingolipid biosynthesis - lacto and neolacto series	KEGG	10	0.656986	1.92897	0.0567066	0.156689	up	14595, 53625
Protein digestion and absorption	KEGG	31	0.382068	1.46531	0.066375	0.181023	up	20541, 12835, 12830, 12829
Maturity onset diabetes of the young	KEGG	2	1.23604	3.44197	0.0690656	0.184067	up	15205
Galactose metabolism	KEGG	16	0.5111	1.66712	0.0692444	0.184067	up	15277, 14595
Proximal tubule bicarbonate reclamation	KEGG	13	0.554275	1.74068	0.0729157	0.188618	up	14661, 14660, 54403
Purine metabolism	KEGG	103	-0.224798	0.798678	0.0741146	0.188618	down	11636, 224129, 11717, 54611, 11515, 76952, 20022, 18972, 67065, 70408, 218832, 230718
SNARE interactions in vesicular transport	KEGG	29	-0.418943	0.657742	0.075528	0.188618	down	20909
Linoleic acid metabolism	KEGG	4	-1.03087	0.356698	0.0771551	0.188618	down	NA
Autoimmune thyroid disease	KEGG	2	-1.34191	0.261346	0.0772436	0.188618	down	NA
Allograft rejection	KEGG	2	-1.34191	0.261346	0.0772436	0.188618	down	NA
Graft-versus-host disease	KEGG	2	-1.34191	0.261346	0.0772436	0.188618	down	NA
Vitamin digestion and absorption	KEGG	8	0.664449	1.94342	0.0838836	0.202478	up	68421, 17250
Sulfur relay system	KEGG	5	-0.911877	0.401769	0.0886154	0.211469	down	NA
Basal transcription factors	KEGG	25	-0.412074	0.662275	0.104191	0.245844	down	NA
Renal cell carcinoma	KEGG	55	0.258968	1.29559	0.106798	0.24706	up	19247, 107746, 11652, 26413, 12928, 18706, 26417, 11863, 224105, 18590, 20525
Long-term depression	KEGG	37	0.311353	1.36527	0.107059	0.24706	up	14678, 26413, 26417, 16001, 16438, 14674, 14679, 14816, 19091, 16440
Glycosaminoglycan biosynthesis - heparan sulfate / heparin	KEGG	13	0.500895	1.6502	0.108761	0.247411	up	15531, 54616, 72727, 56219
Prostate cancer	KEGG	66	0.235949	1.26611	0.109671	0.247411	up	18596, 11652, 26413, 18706, 26417, 16001, 18607, 18590, 13866, 12566
Phototransduction	KEGG	3	-1.06204	0.345751	0.111547	0.247411	down	216869
Axon guidance	KEGG	82	0.211883	1.236	0.111924	0.247411	up	69632, 14678, 20315, 18186, 140570, 26413, 26417, 18844, 224105, 20354, 14679, 231148, 117600
Progesterone-mediated oocyte maturation	KEGG	54	0.256332	1.29218	0.113771	0.248874	up	14678, 11652, 26413, 224129, 17222, 18706, 26417, 16001, 54611, 11515, 14679, 12566
Nicotinate and nicotinamide metabolism	KEGG	15	0.456355	1.57831	0.119989	0.259771	up	76952, 230718
PPAR signaling pathway	KEGG	40	-0.309895	0.733524	0.122452	0.259984	down	14077, 20411, 13167, 18607, 57875, 50790
GnRH signaling pathway	KEGG	60	0.238446	1.26927	0.122564	0.259984	up	12288, 26413, 224129, 26417, 26406, 11515, 16438, 26405, 16440
Protein export	KEGG	19	-0.437408	0.645708	0.132055	0.277315	down	NA
Protein processing in endoplasmic reticulum	KEGG	141	0.14663	1.15793	0.158017	0.328156	up	12330, 223455, 226641, 20224, 13002, 70361, 56453, 20338, 68292, 217365, 320011, 26408, 386649, 18415, 66861, 17156, 17155, 12333, 54197, 59007, 15502, 50527, 78943, 13198
African trypanosomiasis	KEGG	11	-0.53293	0.586883	0.160506	0.328156	down	NA
Osteoclast differentiation	KEGG	71	0.200666	1.22222	0.160953	0.328156	up	16451, 11652, 26413, 18706, 26417, 66513, 20963, 74256, 21812, 16391
Mismatch repair	KEGG	14	-0.46706	0.626842	0.166669	0.336543	down	18972
Staphylococcus aureus infection	KEGG	10	-0.542413	0.581344	0.172871	0.345743	down	NA
Gastric acid secretion	KEGG	35	0.268827	1.30843	0.178898	0.354421	up	14678, 224129, 11515, 16438, 14679, 16440
Pentose phosphate pathway	KEGG	17	-0.409615	0.663906	0.181971	0.35714	down	NA
Cell cycle	KEGG	77	-0.192084	0.825237	0.183684	0.357163	down	22628, 211586, 17222, 17128, 12567, 17127, 11920, 12566, 433759, 19090, 18393, 17216, 26429
Fc epsilon RI signaling pathway	KEGG	43	0.238804	1.26973	0.188725	0.362662	up	11652, 228026, 26413, 18706, 26417, 20963
Dorso-ventral axis formation	KEGG	16	0.378211	1.45967	0.189966	0.362662	up	26413, 18128, 26417, 18129
Cardiac muscle contraction	KEGG	46	-0.241984	0.785069	0.19466	0.368276	down	11938, 20191, 12862, 20541, 12288, 236794
Ribosome biogenesis in eukaryotes	KEGG	54	-0.218301	0.803883	0.204823	0.383261	down	67459, 24127, 217995
Glycerolipid metabolism	KEGG	21	-0.349045	0.705361	0.206244	0.383261	down	110695, 13139
VEGF signaling pathway	KEGG	46	0.22191	1.24846	0.208056	0.383261	up	11652, 26413, 18706, 26417
Fatty acid degradation	KEGG	32	-0.27233	0.761603	0.223088	0.396226	down	15107, 110695, 50790
B cell receptor signaling pathway	KEGG	48	0.210692	1.23453	0.22313	0.396226	up	11652, 26413, 18706, 26417, 20963
Non-small cell lung cancer	KEGG	40	0.228687	1.25695	0.225212	0.396226	up	11652, 26413, 18706, 26417, 18607, 56484, 12567, 58231, 13866
Chemokine signaling pathway	KEGG	85	0.15983	1.17331	0.225974	0.396226	up	14678, 20315, 11652, 26413, 224129, 12928, 20851, 18706, 26417, 56484, 11515, 16452, 14679, 216869
Glycosphingolipid biosynthesis - ganglio series	KEGG	9	0.457418	1.57999	0.226249	0.396226	up	20444
Vasopressin-regulated water reabsorption	KEGG	31	-0.274544	0.759918	0.226658	0.396226	down	13424, 19326, 11515, 22428, 20909, 18195, 59288
Amino sugar and nucleotide sugar metabolism	KEGG	29	-0.282863	0.753623	0.228302	0.396226	down	15277, 54128, 69080, 94181
Biosynthesis of unsaturated fatty acids	KEGG	11	-0.448836	0.638371	0.238517	0.410561	down	106529
Neuroactive ligand-receptor interaction	KEGG	35	0.234662	1.26448	0.243381	0.41345	up	18442, 243764, 14816, 94045, 11549
Primary immunodeficiency	KEGG	9	-0.489522	0.612919	0.244132	0.41345	down	NA
Selenocompound metabolism	KEGG	12	0.383003	1.46668	0.249352	0.418912	up	50493
Steroid hormone biosynthesis	KEGG	5	-0.632953	0.531022	0.256492	0.427487	down	NA
Viral myocarditis	KEGG	29	0.247909	1.28134	0.260204	0.430258	up	13138, 16773, 13405, 11352, 24052
Gap junction	KEGG	58	0.177051	1.19369	0.263988	0.433106	up	14678, 18596, 26413, 224129, 26417, 11515, 16438, 14679, 14816, 26405, 18590, 19091, 16440
Regulation of autophagy	KEGG	17	0.314475	1.36954	0.267092	0.434801	up	108079, 29869, 75669
Glyoxylate and dicarboxylate metabolism	KEGG	12	-0.397927	0.671711	0.275349	0.444794	down	NA
Intestinal immune network for IgA production	KEGG	6	-0.545134	0.579764	0.287839	0.461422	down	20315
Toll-like receptor signaling pathway	KEGG	50	0.175041	1.1913	0.304541	0.482372	up	11652, 26413, 18706, 26417, 66513, 22031
Sphingolipid metabolism	KEGG	23	0.252782	1.2876	0.305502	0.482372	up	223753, 20397, 77626, 268656
Valine, leucine and isoleucine biosynthesis	KEGG	9	0.382204	1.46551	0.319114	0.500104	up	381314, 107045
Acute myeloid leukemia	KEGG	44	0.178696	1.19566	0.324587	0.504913	up	11652, 26413, 20851, 18706, 26417, 58988
Tryptophan metabolism	KEGG	21	-0.268994	0.764148	0.328474	0.507202	down	15107, 110695
Terpenoid backbone biosynthesis	KEGG	10	-0.384908	0.680513	0.335166	0.510616	down	15357, 68603
Lysosome	KEGG	95	0.121145	1.12879	0.335548	0.510616	up	16004, 67300, 75612, 19141, 11764, 11305, 12757, 72175
Thyroid cancer	KEGG	23	-0.249451	0.779229	0.342595	0.517589	down	26413, 26417
Glycosaminoglycan degradation	KEGG	13	0.299226	1.34881	0.356632	0.530257	up	75612
One carbon pool by folate	KEGG	7	0.397978	1.48881	0.358464	0.530257	up	NA
Type I diabetes mellitus	KEGG	4	-0.575121	0.562637	0.358554	0.530257	down	NA
Glycosaminoglycan biosynthesis - chondroitin sulfate / dermatan sulfate	KEGG	11	0.3207	1.37809	0.361298	0.530577	up	72727, 78752
p53 signaling pathway	KEGG	35	-0.192358	0.825012	0.365771	0.533416	down	22084, 12567, 20437, 11920, 12566
Nitrogen metabolism	KEGG	6	0.417628	1.51836	0.370297	0.536292	up	14661, 14660
Glycolysis / Gluconeogenesis	KEGG	37	-0.183505	0.832348	0.374845	0.537906	down	15277, 110695
Glycosylphosphatidylinositol(GPI)-anchor biosynthesis	KEGG	15	-0.2865	0.750887	0.378904	0.537906	down	27392, 72084
Folate biosynthesis	KEGG	5	-0.495216	0.609439	0.379096	0.537906	down	NA
Tight junction	KEGG	71	0.125691	1.13393	0.385179	0.54287	up	14678, 11652, 192195, 12567, 216033, 14679, 12361
Valine, leucine and isoleucine degradation	KEGG	40	-0.169997	0.843668	0.392376	0.547177	down	15107, 15108, 110695, 268860
RNA degradation	KEGG	48	-0.154841	0.856552	0.393446	0.547177	down	13209, 234594, 50783, 70640, 78651, 24127, 218343, 72662, 76522
Long-term potentiation	KEGG	45	0.145978	1.15717	0.418223	0.576951	up	12288, 26413, 26417, 16438, 14816, 16440
Drug metabolism - other enzymes	KEGG	12	0.273471	1.31452	0.42035	0.576951	up	NA
Primary bile acid biosynthesis	KEGG	5	-0.438734	0.644852	0.436569	0.595321	down	NA
Chagas disease (American trypanosomiasis)	KEGG	63	0.118423	1.12572	0.440649	0.597009	up	14678, 11652, 26413, 18706, 26417, 14679, 17127, 21812
Glioma	KEGG	45	0.138111	1.1481	0.444296	0.598091	up	18596, 11652, 26413, 18706, 26417, 16001, 12567, 18590
Fat digestion and absorption	KEGG	12	-0.27302	0.761078	0.4527	0.605523	down	NA
Bacterial invasion of epithelial cells	KEGG	51	0.125891	1.13416	0.459258	0.610406	up	67300, 12928, 18706, 12757, 216033, 12402
Natural killer cell mediated cytotoxicity	KEGG	48	0.128784	1.13744	0.462205	0.610459	up	19247, 26413, 18706, 26417, 20963
Oocyte meiosis	KEGG	67	0.107219	1.11318	0.472602	0.620291	up	22628, 26931, 26413, 224129, 17222, 26417, 16001, 103583, 26932, 11515, 16438, 16440, 12566
Notch signaling pathway	KEGG	38	0.134908	1.14443	0.491918	0.641633	up	18519, 18128, 18129, 15205, 433759
Aminoacyl-tRNA biosynthesis	KEGG	39	-0.126307	0.881344	0.52858	0.685197	down	381314, 107045, 109093
Fc gamma R-mediated phagocytosis	KEGG	58	0.0996018	1.10473	0.534483	0.688597	up	11652, 26413, 12928, 18706, 26417, 20963, 18720, 58988
Non-homologous end-joining	KEGG	6	0.28866	1.33464	0.545827	0.695488	up	19090
Ether lipid metabolism	KEGG	12	0.207089	1.23009	0.546455	0.695488	up	18472, 228061
Steroid biosynthesis	KEGG	7	-0.282191	0.75413	0.553095	0.699699	down	14137
Sulfur metabolism	KEGG	7	-0.275189	0.759429	0.562862	0.707791	down	NA
Glycosphingolipid biosynthesis - globo series	KEGG	5	0.293825	1.34155	0.574153	0.717691	up	20444
Hematopoietic cell lineage	KEGG	20	-0.154326	0.856993	0.581131	0.722115	down	NA
Rheumatoid arthritis	KEGG	32	-0.113799	0.892437	0.60616	0.748785	down	20315, 11964
Butanoate metabolism	KEGG	15	0.15393	1.16641	0.619598	0.756963	up	15107, 214579, 268860
Cytokine-cytokine receptor interaction	KEGG	57	-0.0820822	0.921196	0.619989	0.756963	down	20315, 16195, 18596, 21812, 18590
Pantothenate and CoA biosynthesis	KEGG	9	0.186125	1.20457	0.639766	0.776595	up	211347
Phenylalanine metabolism	KEGG	7	-0.209347	0.811114	0.658593	0.794854	down	NA
Taste transduction	KEGG	10	0.16323	1.17731	0.666536	0.799843	up	16440
Pentose and glucuronate interconversions	KEGG	9	0.167686	1.18256	0.67423	0.804479	up	NA
Citrate cycle (TCA cycle)	KEGG	28	-0.0970086	0.907548	0.680261	0.807089	down	18563
Olfactory transduction	KEGG	11	0.143256	1.15403	0.692651	0.817173	up	19091, 216869
Leukocyte transendothelial migration	KEGG	61	0.0563243	1.05794	0.720448	0.845218	up	19247, 14678, 20315, 232906, 18706, 216033, 14679
Melanoma	KEGG	40	0.0652727	1.06745	0.735717	0.854681	up	18596, 11652, 26413, 18706, 26417, 16001, 12567, 18590, 80903
Fructose and mannose metabolism	KEGG	22	-0.0891399	0.914718	0.736653	0.854681	down	15277, 18640, 54128, 69080
beta-Alanine metabolism	KEGG	16	-0.101526	0.903458	0.744018	0.858482	down	110695, 268860
Lysine degradation	KEGG	30	0.0703929	1.07293	0.751967	0.862913	up	15107, 192195, 110695
NOD-like receptor signaling pathway	KEGG	30	0.06563	1.06783	0.768407	0.876986	up	26413, 26417, 66513
Propanoate metabolism	KEGG	26	-0.0689141	0.933407	0.777119	0.882135	down	110695, 268860
Cell adhesion molecules (CAMs)	KEGG	32	0.0595647	1.06137	0.7828	0.883806	up	19274, 20340, 16410, 21367, 19268, 216856
RIG-I-like receptor signaling pathway	KEGG	38	0.0488126	1.05002	0.806035	0.896847	up	22031, 74256
alpha-Linolenic acid metabolism	KEGG	5	-0.135829	0.872992	0.807353	0.896847	down	NA
Riboflavin metabolism	KEGG	7	-0.112681	0.893436	0.810481	0.896847	down	NA
Glycine, serine and threonine metabolism	KEGG	9	-0.098758	0.905962	0.811433	0.896847	down	110695
Ascorbate and aldarate metabolism	KEGG	7	0.105949	1.11177	0.816544	0.897771	up	110695
Renin-angiotensin system	KEGG	10	0.0861714	1.08999	0.822203	0.898997	up	240028
Other types of O-glycan biosynthesis	KEGG	19	0.061404	1.06333	0.826221	0.898997	up	14595
Taurine and hypotaurine metabolism	KEGG	3	-0.144886	0.865121	0.840406	0.909718	down	NA
Pyruvate metabolism	KEGG	29	0.0429398	1.04388	0.850214	0.915615	up	110695, 18563
Malaria	KEGG	20	0.0477834	1.04894	0.861146	0.915659	up	16971
Synthesis and degradation of ketone bodies	KEGG	5	-0.0945873	0.909748	0.864612	0.915659	down	NA
Amyotrophic lateral sclerosis (ALS)	KEGG	29	-0.0388907	0.961856	0.865621	0.915659	down	14775, 26408, 74018
Arginine and proline metabolism	KEGG	32	-0.0364535	0.964203	0.867696	0.915659	down	76722, 14661, 14660, 110695
Collecting duct acid secretion	KEGG	15	0.0449228	1.04595	0.886699	0.931034	up	11964
Glycerophospholipid metabolism	KEGG	39	0.0268125	1.02718	0.89166	0.931585	up	110911, 13026, 226856, 13139
Bladder cancer	KEGG	28	-0.0302391	0.970214	0.897003	0.932528	down	26413, 26417, 12567, 13866, 73086
Other glycan degradation	KEGG	12	0.0365209	1.0372	0.917537	0.949176	up	NA
Leishmaniasis	KEGG	31	0.0161754	1.01631	0.941602	0.967957	up	16451, 26413, 26417, 66513, 16452
Hepatitis C	KEGG	80	0.0092696	1.00931	0.946739	0.967957	up	16451, 11652, 228026, 26413, 18706, 26417, 22031, 16391, 16835
Complement and coagulation cascades	KEGG	19	0.0178148	1.01797	0.94952	0.967957	up	NA
Cysteine and methionine metabolism	KEGG	18	0.0155768	1.0157	0.957036	0.970906	up	13435
Apoptosis	KEGG	56	-0.00673765	0.993285	0.967525	0.976828	down	19084, 11652, 18706, 12333, 11920, 12368
Prion diseases	KEGG	21	0.00698619	1.00701	0.979214	0.983218	up	226519, 26413, 18128, 26417
Phagosome	KEGG	80	0.00292107	1.00293	0.983218	0.983218	up	13424, 12330, 11964, 16410

## Sheet: S4
Table S4: Full results of KEGG pathway analysis in females
Name	ConceptType	#Genes	Coeff	OddsRatio	P-Value	FDR	Direction	SigGenes
Ribosome	KEGG	58	-1.13725	0.320699	1.30933e-14	2.74959e-12	down	76846, 27176, 27207, 19951, 19943, 19988, 268449, 319195, 19921, 68193, 20084, 67025, 114641, 20090, 225215
Huntington's disease	KEGG	137	-0.728609	0.48258	1.53647e-11	1.61329e-09	down	11949, 28080, 67273, 11950, 11951, 17992, 67264, 66218, 72900, 22334, 67184, 68375, 78330, 66916, 225887, 13191, 67130, 66414, 66495, 12757, 14816, 20022, 26427, 69920, 18795, 12064
Oxidative phosphorylation	KEGG	99	-0.776102	0.460196	2.39213e-10	1.67449e-08	down	11949, 28080, 67273, 11950, 11951, 17992, 67264, 66218, 72900, 67184, 68375, 78330, 66916, 11958, 225887, 67130, 66414, 66495, 66290, 66335
Parkinson's disease	KEGG	94	-0.777417	0.459591	5.21963e-10	2.74031e-08	down	11949, 28080, 67273, 11950, 11951, 17992, 67264, 66218, 72900, 22334, 67184, 68375, 78330, 66916, 225887, 67130, 66414, 22195, 66495, 56791
Alzheimer's disease	KEGG	122	-0.595631	0.551214	2.36784e-07	9.94494e-06	down	11949, 28080, 67273, 11950, 11951, 17992, 67264, 66218, 72900, 67184, 68375, 78330, 66916, 225887, 67130, 66414, 12334, 66495, 15108, 18795
Phosphatidylinositol signaling system	KEGG	53	0.84014	2.31669	3.89734e-07	1.36407e-05	up	320634, 269180, 18711, 18795, 110524
Spliceosome	KEGG	107	-0.613259	0.541583	4.55901e-07	1.3677e-05	down	15481, 13207, 81898, 319322, 20384, 67465, 74351, 20227, 68879, 20222, 20624, 192170, 60365, 64340, 20462, 20630, 68988, 107686, 75062, 107701, 68981, 76522
ABC transporters	KEGG	25	0.999032	2.71565	3.76961e-06	9.89523e-05	up	18671, 76184
Proteasome	KEGG	39	-0.773245	0.461513	2.42486e-05	0.000514744	down	19182, 70247, 17463, 19186, 19175, 19181, 19166
Inositol phosphate metabolism	KEGG	45	0.764963	2.14891	2.45116e-05	0.000514744	up	21991, 320634, 269180, 18711, 18795
Toll-like receptor signaling pathway	KEGG	50	0.675031	1.96409	0.00014541	0.00276777	up	16179, 12675, 106759
Insulin signaling pathway	KEGG	101	0.508	1.66196	0.000158158	0.00276777	up	53413, 17346, 103988
MAPK signaling pathway	KEGG	157	0.388456	1.4747	0.000516158	0.00833794	up	15481, 286940, 225028, 13714, 12675, 17346, 18590, 53357, 12064
Chronic myeloid leukemia	KEGG	60	0.575375	1.7778	0.000616368	0.00924552	up	19247, 12443, 12675
Focal adhesion	KEGG	142	-0.370391	0.690464	0.000957296	0.0134021	down	17906, 12825, 12842, 12843, 11461, 12834, 12833, 12831, 16777, 11848, 12835, 60595, 12334, 11465, 286940, 14360, 12443, 18590, 245026, 70584
Apoptosis	KEGG	55	0.569751	1.76783	0.00114262	0.0149969	up	12334, 16179, 12675
Protein digestion and absorption	KEGG	31	-0.677728	0.507769	0.00122691	0.0151559	down	12825, 12842, 12843, 12819, 12834, 12833, 12831, 12835, 245026, 215335
Maturity onset diabetes of the young	KEGG	2	1.66836	5.30347	0.00147711	0.0161315	up	103988
Jak-STAT signaling pathway	KEGG	65	0.520236	1.68242	0.00152046	0.0161315	up	19247, 12443
Protein processing in endoplasmic reticulum	KEGG	141	-0.355917	0.700531	0.0016023	0.0161315	down	15516, 12955, 15481, 12317, 269523, 81910, 12017, 12334, 103963, 56424, 63958, 13200, 19089, 67838, 66256, 386649, 27061, 12304, 15502
ECM-receptor interaction	KEGG	51	-0.545138	0.579762	0.00161315	0.0161315	down	12825, 15530, 12842, 12843, 12834, 12833, 12831, 16777, 12835, 245026
Adipocytokine signaling pathway	KEGG	48	0.560516	1.75158	0.00273382	0.0260956	up	19247, 12675
DNA replication	KEGG	18	-0.766885	0.464457	0.00349716	0.0319306	down	18538, 18972, 17216
Amoebiasis	KEGG	53	-0.494132	0.6101	0.00411866	0.0356141	down	12825, 12842, 12843, 12831, 16777, 60595, 18795
RIG-I-like receptor signaling pathway	KEGG	38	0.591606	1.80689	0.00423978	0.0356141	up	12675
Cardiac muscle contraction	KEGG	46	-0.514266	0.597939	0.00498417	0.0397301	down	17888, 11464, 17906, 21954, 21924
Metabolism of xenobiotics by cytochrome P450	KEGG	14	-0.813743	0.443196	0.00510815	0.0397301	down	14874, 14863, 68312, 14866
Pancreatic cancer	KEGG	54	0.490815	1.63365	0.00644877	0.0483657	up	12443, 12675
Lysosome	KEGG	95	0.37664	1.45738	0.0075837	0.0549165	up	11776, 12757, 108011
Osteoclast differentiation	KEGG	71	0.419524	1.52124	0.00903265	0.0630277	up	14360, 12675
Hepatitis C	KEGG	80	0.395603	1.48528	0.00948415	0.0630277	up	51792, 12675, 106759, 22259
T cell receptor signaling pathway	KEGG	60	0.44815	1.56541	0.00960422	0.0630277	up	11848, 14360, 12675, 70584
Galactose metabolism	KEGG	15	0.768478	2.15648	0.0104127	0.0662627	up	103988
Circadian rhythm	KEGG	20	0.689266	1.99225	0.0108914	0.0672704	up	18628
Antigen processing and presentation	KEGG	29	-0.557529	0.572622	0.0133285	0.0780354	down	15516, 15481, 12317, 19186
Mismatch repair	KEGG	14	-0.740043	0.477093	0.0133775	0.0780354	down	17685, 18538, 18972
Toxoplasmosis	KEGG	71	0.396767	1.48701	0.0139154	0.0789791	up	15481, 14678, 16777, 16179, 12675, 53357
mTOR signaling pathway	KEGG	40	0.502182	1.65232	0.0153711	0.0835149	up	NA
Glycosaminoglycan biosynthesis - heparan sulfate / heparin	KEGG	12	0.796827	2.21849	0.0155099	0.0835149	up	NA
B cell receptor signaling pathway	KEGG	48	0.461092	1.5858	0.0162623	0.0853771	up	12675
Basal cell carcinoma	KEGG	23	0.616884	1.85315	0.017847	0.0914116	up	13542
Protein export	KEGG	19	-0.621725	0.537017	0.0213641	0.105333	down	69089, 217337
Notch signaling pathway	KEGG	38	0.489635	1.63172	0.0215681	0.105333	up	18519, 13542
Viral myocarditis	KEGG	29	-0.512948	0.598728	0.0248421	0.118564	down	17888, 11461, 17886, 20391, 11465, 14360, 77579, 12443
Glycerophospholipid metabolism	KEGG	39	0.466247	1.594	0.0276454	0.129012	up	53357, 110524
Acute myeloid leukemia	KEGG	43	0.441578	1.55516	0.0297664	0.13589	up	16480, 12443, 12675
Neurotrophin signaling pathway	KEGG	94	0.304978	1.35659	0.0329154	0.144115	up	19247, 11848, 192662, 16179, 12064
Neuroactive ligand-receptor interaction	KEGG	33	0.486295	1.62628	0.0331374	0.144115	up	14816, 13489
RNA transport	KEGG	109	-0.274071	0.760278	0.0336269	0.144115	down	13628, 230721, 16211, 226982, 56347, 217869, 27979, 55944, 73192, 192170, 60365, 217715, 209354, 56698, 20220, 114615, 67031
African trypanosomiasis	KEGG	11	-0.709984	0.491652	0.0369564	0.155217	down	18795
PPAR signaling pathway	KEGG	41	0.431309	1.53927	0.0384894	0.158486	up	20280, 57875, 22190, 22259
Nucleotide excision repair	KEGG	31	-0.463338	0.62918	0.0393266	0.158819	down	66671, 18538, 18972
Vasopressin-regulated water reabsorption	KEGG	31	-0.45127	0.636819	0.045538	0.180433	down	13191, 192662, 13427, 26427
Phenylalanine metabolism	KEGG	7	-0.792059	0.452911	0.0531294	0.206614	down	14719
Starch and sucrose metabolism	KEGG	18	0.566039	1.76128	0.0580528	0.221656	up	103988
Small cell lung cancer	KEGG	60	0.328143	1.38839	0.0633793	0.235848	up	16777, 12443, 12675
Tight junction	KEGG	72	-0.290094	0.748193	0.064016	0.235848	down	17888, 17906, 12385, 11461, 14678, 17886, 51792, 11848, 60595, 11465, 77579, 21873
Bile secretion	KEGG	30	0.441599	1.55519	0.067898	0.23971	up	18671
Other glycan degradation	KEGG	12	0.643552	1.90323	0.0683559	0.23971	up	NA
Sulfur metabolism	KEGG	7	-0.757546	0.468816	0.0684886	0.23971	down	23971
Chemokine signaling pathway	KEGG	85	0.272569	1.31333	0.0700773	0.24125	up	14678, 11848, 14688, 12675, 18795, 14700
Colorectal cancer	KEGG	48	0.350327	1.41953	0.0741952	0.245302	up	11848, 12443, 17685
Cytosolic DNA-sensing pathway	KEGG	24	0.475941	1.60953	0.074873	0.245302	up	12675, 70428, 70408
Natural killer cell mediated cytotoxicity	KEGG	48	0.346659	1.41433	0.077457	0.245302	up	19247, 14360
ErbB signaling pathway	KEGG	62	0.307534	1.36007	0.0779427	0.245302	up	70584
Systemic lupus erythematosus	KEGG	24	-0.44968	0.637832	0.0787528	0.245302	down	60595, 15078
Staphylococcus aureus infection	KEGG	11	0.646032	1.90795	0.0791873	0.245302	up	NA
Fatty acid degradation	KEGG	33	0.408244	1.50417	0.0794311	0.245302	up	NA
Hypertrophic cardiomyopathy (HCM)	KEGG	54	-0.311722	0.732185	0.0817046	0.248048	down	17888, 11464, 17906, 21954, 21924, 11461, 16905, 20391, 11465
Complement and coagulation cascades	KEGG	20	0.50153	1.65125	0.0835849	0.248048	up	74145
Glycosphingolipid biosynthesis - lacto and neolacto series	KEGG	9	0.688634	1.99099	0.0838638	0.248048	up	NA
Type II diabetes mellitus	KEGG	28	0.425416	1.53023	0.0903006	0.263377	up	18746, 103988
Endometrial cancer	KEGG	42	0.345796	1.41311	0.0988723	0.284427	up	12385, 12443
TGF-beta signaling pathway	KEGG	48	0.320766	1.37818	0.103712	0.294318	up	51792, 11848, 268977, 21781
RNA polymerase	KEGG	21	-0.441411	0.643129	0.106931	0.295915	down	20022, 70428, 70408, 69920
Arrhythmogenic right ventricular cardiomyopathy (ARVC)	KEGG	46	-0.309477	0.733831	0.11002	0.295915	down	12385, 11461, 16480, 60595, 16905, 20391, 11465
Metabolic pathways	KEGG	630	0.0989956	1.10406	0.110599	0.295915	up	12715, 18746, 11949, 28080, 14719, 11636, 67273, 11950, 11951, 16828, 21991, 17992, 67264, 66218, 56012, 72900, 68375, 78330, 66916, 11958, 225887, 67130, 20280, 232087, 11565, 110119, 66495, 15108, 20917, 103963, 13200, 14660, 15926, 107569, 66290, 230027, 79464, 66335, 19215, 11637, 110208, 14874, 12183, 13433, 54128, 320634, 269180, 76282, 78754, 14137, 11761, 20022, 70428, 14629, 20440, 18972…
Gap junction	KEGG	58	-0.277754	0.757483	0.111065	0.295915	down	14678, 22154, 22142, 14816, 18590, 13489, 18795, 22153
Other types of O-glycan biosynthesis	KEGG	18	0.487995	1.62905	0.11132	0.295915	up	108155, 20440
Pathways in cancer	KEGG	201	0.158072	1.17125	0.1168	0.304511	up	15516, 12385, 16480, 16777, 11848, 13542, 12443, 12675, 18590, 17685
Ribosome biogenesis in eukaryotes	KEGG	55	-0.278647	0.756807	0.11918	0.304511	down	66181, 74778, 67619, 14113
Purine metabolism	KEGG	103	-0.207519	0.812597	0.121695	0.304511	down	18746, 11636, 11565, 107569, 11637, 20022, 70428, 18972, 70408, 23971, 69920
Peroxisome	KEGG	58	0.279502	1.32247	0.122125	0.304511	up	20280, 15926, 19301, 56273, 18634
Glycosylphosphatidylinositol(GPI)-anchor biosynthesis	KEGG	15	0.512931	1.67018	0.122935	0.304511	up	72084
Dilated cardiomyopathy	KEGG	56	-0.273442	0.760756	0.123372	0.304511	down	17888, 11464, 17906, 21954, 21924, 11461, 16905, 20391, 11465
Glycosphingolipid biosynthesis - ganglio series	KEGG	9	0.627922	1.87371	0.1249	0.304511	up	NA
Non-small cell lung cancer	KEGG	40	0.329092	1.38971	0.126154	0.304511	up	12443
Carbohydrate digestion and absorption	KEGG	16	0.48975	1.63191	0.131282	0.313286	up	NA
Fc gamma R-mediated phagocytosis	KEGG	58	0.27184	1.31238	0.13303	0.313891	up	12631, 13430, 53357
NOD-like receptor signaling pathway	KEGG	29	0.368932	1.44619	0.140031	0.324916	up	15516, 67955, 12675
Fc epsilon RI signaling pathway	KEGG	43	0.306953	1.35928	0.140797	0.324916	up	14360, 53357
Base excision repair	KEGG	17	-0.441014	0.643384	0.146615	0.334665	down	18538, 18972
Gastric acid secretion	KEGG	35	-0.317172	0.728206	0.150984	0.340932	down	11461, 14678, 18795
Homologous recombination	KEGG	11	-0.518669	0.595312	0.157178	0.349898	down	18972, 19364
Bacterial invasion of epithelial cells	KEGG	51	-0.262645	0.769015	0.158287	0.349898	down	12385, 11461, 11848, 13430, 11465, 78514, 12757
Proximal tubule bicarbonate reclamation	KEGG	13	0.502471	1.6528	0.160439	0.35096	up	14660
Dorso-ventral axis formation	KEGG	16	0.454764	1.5758	0.165519	0.355174	up	68166
Nitrogen metabolism	KEGG	6	0.677299	1.96855	0.165748	0.355174	up	14660
Amyotrophic lateral sclerosis (ALS)	KEGG	29	0.345277	1.41238	0.169204	0.358919	up	NA
Nicotinate and nicotinamide metabolism	KEGG	15	0.461121	1.58585	0.172368	0.360896	up	107569, 11761
Hematopoietic cell lineage	KEGG	19	0.412219	1.51016	0.176179	0.360896	up	NA
Glycosaminoglycan biosynthesis - chondroitin sulfate / dermatan sulfate	KEGG	10	0.543238	1.72157	0.17628	0.360896	up	NA
N-Glycan biosynthesis	KEGG	34	0.314195	1.36916	0.178496	0.360896	up	103963, 13200, 20440
Leishmaniasis	KEGG	31	0.327853	1.38798	0.17873	0.360896	up	16179
Linoleic acid metabolism	KEGG	4	-0.729086	0.48235	0.18867	0.373522	down	53357
Lysine degradation	KEGG	30	0.325732	1.38504	0.188788	0.373522	up	NA
Cell cycle	KEGG	77	-0.201871	0.8172	0.190785	0.373522	down	12443, 69010, 56317, 22642, 66671, 21781, 18538, 17216
Vascular smooth muscle contraction	KEGG	61	0.23033	1.25901	0.193821	0.373522	up	11848, 53357, 18795
Glycine, serine and threonine metabolism	KEGG	9	-0.524813	0.591666	0.193876	0.373522	down	NA
Primary bile acid biosynthesis	KEGG	5	0.686174	1.9861	0.197477	0.377002	up	20280
Phagosome	KEGG	80	-0.194025	0.823637	0.20088	0.37922	down	12317, 11461, 22154, 11465, 22142, 13427, 66290, 66335, 18711, 22153
Steroid biosynthesis	KEGG	7	-0.572765	0.563964	0.20225	0.37922	down	14137
Pantothenate and CoA biosynthesis	KEGG	8	0.561477	1.75326	0.207501	0.385622	up	NA
Glycosaminoglycan degradation	KEGG	13	0.452384	1.57206	0.213362	0.393035	up	NA
Salivary secretion	KEGG	34	0.289545	1.33582	0.2167	0.395713	up	20496, 18795
Aminoacyl-tRNA biosynthesis	KEGG	39	-0.258033	0.77257	0.224506	0.403575	down	85305, 353172, 20226, 15115
Leukocyte transendothelial migration	KEGG	62	-0.207776	0.812389	0.224849	0.403575	down	17906, 12385, 11461, 19247, 14678, 11848, 60595, 11465
Pentose phosphate pathway	KEGG	17	-0.355482	0.700836	0.254326	0.452614	down	110208
Pyrimidine metabolism	KEGG	61	-0.193398	0.824154	0.263615	0.463215	down	50493, 107569, 232223, 20022, 70428, 18972, 70408, 69920
Hedgehog signaling pathway	KEGG	21	0.329337	1.39005	0.264694	0.463215	up	NA
Sphingolipid metabolism	KEGG	23	0.314037	1.36894	0.267238	0.463802	up	NA
Prion diseases	KEGG	21	-0.307431	0.735333	0.280135	0.4822	down	14360, 17967
Glycolysis / Gluconeogenesis	KEGG	37	-0.233028	0.792132	0.287713	0.491217	down	18746, 16828, 21991, 56012, 12183, 103988
Citrate cycle (TCA cycle)	KEGG	28	0.271217	1.31156	0.294113	0.498095	up	20917, 15926
Glycerolipid metabolism	KEGG	21	0.306306	1.3584	0.301471	0.505281	up	110524
VEGF signaling pathway	KEGG	46	0.209824	1.23346	0.303168	0.505281	up	53357
Mucin type O-Glycan biosynthesis	KEGG	14	0.366808	1.44312	0.305744	0.505453	up	78754
Histidine metabolism	KEGG	12	-0.37383	0.688094	0.310414	0.505453	down	NA
Renal cell carcinoma	KEGG	55	0.189607	1.20877	0.310492	0.505453	up	19247, 18590, 70584
Butanoate metabolism	KEGG	15	0.329037	1.38963	0.345454	0.558041	up	268860
Aldosterone-regulated sodium reabsorption	KEGG	23	0.265119	1.30359	0.352415	0.561725	up	NA
Chagas disease (American trypanosomiasis)	KEGG	63	0.162667	1.17664	0.353084	0.561725	up	12317, 14678, 51792, 16179, 12675, 106759, 18795
Cysteine and methionine metabolism	KEGG	17	0.297706	1.34677	0.36635	0.578448	up	14719, 16828, 232087, 13433
Oocyte meiosis	KEGG	67	-0.149225	0.861375	0.370191	0.580149	down	51792, 69010, 56317
Glycosphingolipid biosynthesis - globo series	KEGG	5	0.500236	1.64911	0.384322	0.596361	up	NA
Sulfur relay system	KEGG	5	0.498538	1.64631	0.386215	0.596361	up	NA
SNARE interactions in vesicular transport	KEGG	29	0.214176	1.23884	0.402113	0.61417	up	22320
Drug metabolism - cytochrome P450	KEGG	17	-0.265617	0.766732	0.405568	0.61417	down	14874, 14863, 68312, 14866, 11761
Melanoma	KEGG	40	0.180642	1.19799	0.408735	0.61417	up	12443, 18590
Phototransduction	KEGG	3	-0.56586	0.567872	0.409446	0.61417	down	14688
Valine, leucine and isoleucine biosynthesis	KEGG	9	0.357118	1.4292	0.424201	0.630792	up	NA
Taurine and hypotaurine metabolism	KEGG	2	0.671621	1.95741	0.426536	0.630792	up	NA
Endocytosis	KEGG	146	0.0907627	1.09501	0.437497	0.642479	up	15481, 11848, 13430, 12757, 71889, 78618, 52348, 22365
Progesterone-mediated oocyte maturation	KEGG	54	0.143315	1.15409	0.448237	0.646467	up	15516, 14678, 69010, 56317
Long-term potentiation	KEGG	45	0.156553	1.16947	0.448557	0.646467	up	14816, 18795
Drug metabolism - other enzymes	KEGG	12	0.296322	1.3449	0.449483	0.646467	up	NA
Cytokine-cytokine receptor interaction	KEGG	56	0.139432	1.14962	0.452653	0.646467	up	12778, 18590
Biosynthesis of unsaturated fatty acids	KEGG	11	0.304821	1.35638	0.455606	0.646467	up	NA
Valine, leucine and isoleucine degradation	KEGG	40	0.157636	1.17074	0.471432	0.660712	up	15108, 11761, 268860
Vitamin digestion and absorption	KEGG	8	0.341653	1.40727	0.472314	0.660712	up	NA
Intestinal immune network for IgA production	KEGG	6	0.387736	1.47364	0.475083	0.660712	up	NA
Basal transcription factors	KEGG	25	-0.187695	0.828867	0.484325	0.669133	down	NA
Prostate cancer	KEGG	67	0.115145	1.12204	0.498527	0.684253	up	15516, 12443, 12675, 18590, 26427
Glycosaminoglycan biosynthesis - keratan sulfate	KEGG	8	0.313156	1.36774	0.51235	0.696447	up	NA
Porphyrin and chlorophyll metabolism	KEGG	22	0.190213	1.20951	0.517066	0.696447	up	14319, 15368
Regulation of autophagy	KEGG	16	0.222018	1.24859	0.517361	0.696447	up	NA
Primary immunodeficiency	KEGG	9	0.289379	1.3356	0.522554	0.698958	up	NA
Glioma	KEGG	45	0.127757	1.13628	0.536583	0.71318	up	12443, 18590
Alanine, aspartate and glutamate metabolism	KEGG	20	-0.176099	0.838535	0.557733	0.736628	down	14719, 11565, 14660, 76282, 268860
Fat digestion and absorption	KEGG	12	-0.218319	0.803869	0.569469	0.743223	down	14719, 53357
Wnt signaling pathway	KEGG	97	0.0801789	1.08348	0.572602	0.743223	up	51792, 11848, 13542, 12443, 20377, 18795
Tryptophan metabolism	KEGG	22	0.165575	1.18007	0.573343	0.743223	up	11761
Ascorbate and aldarate metabolism	KEGG	7	-0.273368	0.760813	0.581086	0.748638	down	NA
Long-term depression	KEGG	36	0.124893	1.13303	0.588347	0.753371	up	14678, 51792, 14816, 53357, 18795
Synthesis and degradation of ketone bodies	KEGG	5	0.317644	1.37389	0.598696	0.761977	up	NA
Regulation of actin cytoskeleton	KEGG	129	-0.0636483	0.938335	0.604226	0.764382	down	17906, 11461, 17886, 11848, 60595, 12631, 11465, 77579, 20430, 18590, 18711, 70584
Fructose and mannose metabolism	KEGG	21	0.14432	1.15525	0.631774	0.784471	up	21991, 18640, 110119, 54128
Non-homologous end-joining	KEGG	6	-0.257241	0.773182	0.631988	0.784471	down	14375
Riboflavin metabolism	KEGG	7	0.245774	1.27861	0.633893	0.784471	up	NA
Collecting duct acid secretion	KEGG	15	-0.164811	0.848054	0.635048	0.784471	down	66290, 66335
Glyoxylate and dicarboxylate metabolism	KEGG	12	-0.173178	0.840988	0.654831	0.791488	down	NA
Melanogenesis	KEGG	53	0.0843048	1.08796	0.658522	0.791488	up	14678, 13542, 26427, 18795, 13190
beta-Alanine metabolism	KEGG	16	-0.145466	0.864619	0.666412	0.791488	down	268860
Adherens junction	KEGG	52	-0.081199	0.92201	0.669577	0.791488	down	12385, 11461, 11848, 60595, 11465, 14360
Autoimmune thyroid disease	KEGG	2	-0.38269	0.682024	0.669639	0.791488	down	NA
Allograft rejection	KEGG	2	-0.38269	0.682024	0.669639	0.791488	down	NA
Graft-versus-host disease	KEGG	2	-0.38269	0.682024	0.669639	0.791488	down	NA
One carbon pool by folate	KEGG	7	0.21878	1.24456	0.672528	0.791488	up	NA
Renin-angiotensin system	KEGG	9	0.190428	1.20977	0.677438	0.791488	up	NA
Malaria	KEGG	19	-0.128827	0.879126	0.678418	0.791488	down	NA
Type I diabetes mellitus	KEGG	4	-0.263552	0.768317	0.688072	0.798315	down	NA
mRNA surveillance pathway	KEGG	60	-0.0613526	0.940492	0.730069	0.842387	down	230721, 51792, 192170, 60365, 20220, 67031, 67897
Selenocompound metabolism	KEGG	12	0.124389	1.13246	0.754591	0.865579	up	50493, 232223, 23971
alpha-Linolenic acid metabolism	KEGG	5	-0.183908	0.832012	0.758412	0.865579	down	53357
Thyroid cancer	KEGG	23	-0.0841503	0.919293	0.767374	0.867628	down	12443
Cell adhesion molecules (CAMs)	KEGG	32	-0.0712293	0.931248	0.768471	0.867628	down	17967
Pancreatic secretion	KEGG	39	-0.0609745	0.940847	0.781391	0.872582	down	11848, 20496, 53357, 18795
Terpenoid backbone biosynthesis	KEGG	9	0.125742	1.13399	0.784226	0.872582	up	NA
Arginine and proline metabolism	KEGG	32	-0.0659507	0.936177	0.785324	0.872582	down	12715, 14719, 14660
Axon guidance	KEGG	83	-0.0380204	0.962693	0.802707	0.887202	down	14678, 11848, 12631, 14360, 13643, 70584
Ether lipid metabolism	KEGG	12	-0.0831792	0.920186	0.832415	0.912239	down	53357
GnRH signaling pathway	KEGG	60	0.0375502	1.03826	0.834047	0.912239	up	53357, 18795
Bladder cancer	KEGG	28	0.0478921	1.04906	0.854422	0.929682	up	12443
Retinol metabolism	KEGG	7	-0.0908436	0.91316	0.859622	0.930518	down	NA
Olfactory transduction	KEGG	11	-0.0699113	0.932477	0.864995	0.931533	down	NA
Arachidonic acid metabolism	KEGG	18	-0.0455241	0.955497	0.887833	0.951249	down	19215, 53357
Pentose and glucuronate interconversions	KEGG	9	0.0521947	1.05358	0.909458	0.96638	up	NA
Folate biosynthesis	KEGG	5	-0.0604705	0.941322	0.921026	0.96638	down	NA
p53 signaling pathway	KEGG	36	0.0220026	1.02225	0.923861	0.96638	up	12443
Glutathione metabolism	KEGG	32	-0.0228832	0.977377	0.925038	0.96638	down	15926, 110208, 14874, 14863, 68312, 14866, 14629
Calcium signaling pathway	KEGG	77	0.0128336	1.01292	0.93545	0.96638	up	21924, 22334, 14816, 18795
Ubiquitin mediated proteolysis	KEGG	111	-0.00997917	0.99007	0.939994	0.96638	down	22195, 56424, 63958, 69010, 56317, 22209, 66515, 93765, 109161, 56791
Tyrosine metabolism	KEGG	16	0.0248423	1.02515	0.942463	0.96638	up	14719, 14874, 11761, 13190
Propanoate metabolism	KEGG	26	-0.0173113	0.982838	0.948814	0.96638	down	16828, 20917, 268860
Steroid hormone biosynthesis	KEGG	5	0.0392998	1.04008	0.94905	0.96638	up	NA
Pyruvate metabolism	KEGG	29	-0.0153202	0.984797	0.952188	0.96638	down	18746, 16828
RNA degradation	KEGG	48	0.0118752	1.01195	0.952574	0.96638	up	230721, 50912, 72587, 70640, 76522, 66583
Amino sugar and nucleotide sugar metabolism	KEGG	28	0.00373675	1.00374	0.98855	0.996466	up	110119, 54128, 103988
Taste transduction	KEGG	9	-0.00309061	0.996914	0.99461	0.996466	down	14688
Rheumatoid arthritis	KEGG	32	0.0010792	1.00108	0.996466	0.996466	up	66290, 66335

## Sheet: S5
Table S5: DMCs in Pb-treated males
seqnames_M	start_M	end	width	strand	meth_case_M	meth_control_M	meth_diff_M	direction_M	stat_M	pvalue_M	fdr_M	annot.symbol	annot.type_M
chr9	42659814	42659814	1	*	25	95	-70	control	4.78131	1.74e-06	0.00785561	Grik4	mm10_genes_exons
chr9	42659814	42659814	1	*	25	95	-70	control	4.78131	1.74e-06	0.00785561	NA	mm10_cpg_inter
chr6	66766176	66766176	1	*	43.24	100	-56.76	control	5.43706	5.42e-08	0.000652256	NA	mm10_cpg_inter
chr6	122456416	122456416	1	*	27.78	81.33	-53.56	control	5.71784	1.08e-08	0.000192288	NA	mm10_genes_promoters
chr6	122456416	122456416	1	*	27.78	81.33	-53.56	control	5.71784	1.08e-08	0.000192288	NA	mm10_genes_1to5kb
chr6	122456416	122456416	1	*	27.78	81.33	-53.56	control	5.71784	1.08e-08	0.000192288	Rimklb	mm10_genes_exons
chr6	122456416	122456416	1	*	27.78	81.33	-53.56	control	5.71784	1.08e-08	0.000192288	Rimklb	mm10_genes_introns
chr6	122456416	122456416	1	*	27.78	81.33	-53.56	control	5.71784	1.08e-08	0.000192288	NA	mm10_cpg_inter
chrY	1717957	1717957	1	*	46	98.67	-52.67	control	7.50649	6.07e-14	4.44e-08	NA	mm10_cpg_inter
chr2	173234709	173234709	1	*	56.36	100	-43.64	control	6.8077	9.92e-12	1.45e-06	Pmepa1	mm10_genes_exons
chr2	173234709	173234709	1	*	56.36	100	-43.64	control	6.8077	9.92e-12	1.45e-06	Pmepa1	mm10_genes_introns
chr2	173234709	173234709	1	*	56.36	100	-43.64	control	6.8077	9.92e-12	1.45e-06	NA	mm10_cpg_inter
chr1	87191092	87191092	1	*	47.06	87.5	-40.44	control	4.40859	1.04e-05	0.0243665	Chrnd	mm10_genes_5UTRs
chr1	87191092	87191092	1	*	47.06	87.5	-40.44	control	4.40859	1.04e-05	0.0243665	Chrnd	mm10_genes_exons
chr1	87191092	87191092	1	*	47.06	87.5	-40.44	control	4.40859	1.04e-05	0.0243665	NA	mm10_cpg_shelves
chr3	146117649	146117649	1	*	1.27	40.24	-38.98	control	6.01391	1.81e-09	4.73e-05	Mcoln3	mm10_genes_1to5kb
chr3	146117649	146117649	1	*	1.27	40.24	-38.98	control	6.01391	1.81e-09	4.73e-05	NA	mm10_genes_1to5kb
chr3	146117649	146117649	1	*	1.27	40.24	-38.98	control	6.01391	1.81e-09	4.73e-05	Mcoln3	mm10_genes_introns
chr3	146117649	146117649	1	*	1.27	40.24	-38.98	control	6.01391	1.81e-09	4.73e-05	NA	mm10_cpg_inter
chr16	21277694	21277694	1	*	53.03	92	-38.97	control	4.33576	1.45e-05	0.0295671	Gm16863	mm10_genes_introns
chr16	21277694	21277694	1	*	53.03	92	-38.97	control	4.33576	1.45e-05	0.0295671	NA	mm10_cpg_inter
chr17	39846637	39846637	1	*	35.8	74.55	-38.74	control	4.52444	6.06e-06	0.0170782	Rn45s	mm10_genes_promoters
chr17	39846637	39846637	1	*	35.8	74.55	-38.74	control	4.52444	6.06e-06	0.0170782	NA	mm10_genes_exons
chr17	39846637	39846637	1	*	35.8	74.55	-38.74	control	4.52444	6.06e-06	0.0170782	NA	mm10_cpg_shores
chr7	47537488	47537488	1	*	24.49	62.22	-37.73	control	4.24398	2.2e-05	0.0384798	NA	mm10_cpg_inter
chr14	119377687	119377687	1	*	64.38	100	-35.62	control	7.19901	6.07e-13	1.69e-07	Hs6st3	mm10_genes_introns
chr14	119377687	119377687	1	*	64.38	100	-35.62	control	7.19901	6.07e-13	1.69e-07	NA	mm10_cpg_inter
chr9	85918955	85918955	1	*	63.38	97.98	-34.6	control	6.58733	4.48e-11	3.64e-06	NA	mm10_cpg_inter
chr8	127113493	127113493	1	*	62.9	97.09	-34.18	control	4.6683	3.04e-06	0.0112416	Pard3	mm10_genes_introns
chr8	127113493	127113493	1	*	62.9	97.09	-34.18	control	4.6683	3.04e-06	0.0112416	NA	mm10_cpg_inter
chr11	98598913	98598913	1	*	25.45	59.6	-34.15	control	5.05609	4.28e-07	0.00288526	Lrrc3c	mm10_genes_exons
chr11	98598913	98598913	1	*	25.45	59.6	-34.15	control	5.05609	4.28e-07	0.00288526	NA	mm10_cpg_inter
chr4	130174089	130174089	1	*	0	33.7	-33.7	control	4.78591	1.7e-06	0.00777393	Tinagl1	mm10_genes_1to5kb
chr4	130174089	130174089	1	*	0	33.7	-33.7	control	4.78591	1.7e-06	0.00777393	Tinagl1	mm10_genes_exons
chr4	130174089	130174089	1	*	0	33.7	-33.7	control	4.78591	1.7e-06	0.00777393	NA	mm10_cpg_inter
chr11	118885267	118885267	1	*	49.28	81.06	-31.79	control	5.59099	2.26e-08	0.000336699	Rbfox3	mm10_genes_introns
chr11	118885267	118885267	1	*	49.28	81.06	-31.79	control	5.59099	2.26e-08	0.000336699	NA	mm10_cpg_inter
chr4	81149542	81149542	1	*	65.38	96.99	-31.61	control	4.36598	1.27e-05	0.0269614	NA	mm10_cpg_inter
chr17	31734918	31734918	1	*	8.82	40.31	-31.49	control	5.20671	1.92e-07	0.00173404	NA	mm10_cpg_inter
chr8	117035815	117035815	1	*	69.09	100	-30.91	control	5.43727	5.41e-08	0.000652256	NA	mm10_genes_promoters
chr8	117035815	117035815	1	*	69.09	100	-30.91	control	5.43727	5.41e-08	0.000652256	Pkd1l2	mm10_genes_exons
chr8	117035815	117035815	1	*	69.09	100	-30.91	control	5.43727	5.41e-08	0.000652256	NA	mm10_cpg_inter
chr11	111551802	111551802	1	*	50.37	80.3	-29.93	control	4.25484	2.09e-05	0.0372845	NA	mm10_cpg_inter
chr4	135163331	135163331	1	*	64.86	94.41	-29.54	control	4.36979	1.24e-05	0.0267294	Runx3	mm10_genes_exons
chr4	135163331	135163331	1	*	64.86	94.41	-29.54	control	4.36979	1.24e-05	0.0267294	NA	mm10_cpg_inter
chr7	23694626	23694626	1	*	48.4	76.94	-28.54	control	4.15156	3.3e-05	0.0491513	NA	mm10_cpg_inter
chrX	13486450	13486450	1	*	4.55	32.86	-28.31	control	4.39108	1.13e-05	0.0255954	Nyx	mm10_genes_exons
chrX	13486450	13486450	1	*	4.55	32.86	-28.31	control	4.39108	1.13e-05	0.0255954	NA	mm10_cpg_islands
chr9	64631030	64631030	1	*	68.81	96.88	-28.07	control	4.61865	3.86e-06	0.0127712	Megf11	mm10_genes_introns
chr9	64631030	64631030	1	*	68.81	96.88	-28.07	control	4.61865	3.86e-06	0.0127712	NA	mm10_cpg_inter
chr12	61154764	61154764	1	*	65	91.82	-26.82	control	6.22416	4.84e-10	2.06e-05	NA	mm10_cpg_inter
chr3	51697783	51697783	1	*	71.7	98.31	-26.61	control	4.25159	2.12e-05	0.0376458	Maml3	mm10_genes_exons
chr3	51697783	51697783	1	*	71.7	98.31	-26.61	control	4.25159	2.12e-05	0.0376458	NA	mm10_cpg_inter
chr7	30832801	30832801	1	*	2.5	28	-25.5	control	4.33244	1.47e-05	0.0299321	NA	mm10_cpg_inter
chr3	32819199	32819199	1	*	65.62	91.01	-25.39	control	4.90134	9.52e-07	0.00514792	Usp13	mm10_genes_introns
chr3	32819199	32819199	1	*	65.62	91.01	-25.39	control	4.90134	9.52e-07	0.00514792	NA	mm10_cpg_shores
chr17	29241524	29241524	1	*	63.39	88.73	-25.34	control	4.20971	2.56e-05	0.0420835	Cpne5	mm10_genes_1to5kb
chr17	29241524	29241524	1	*	63.39	88.73	-25.34	control	4.20971	2.56e-05	0.0420835	NA	mm10_cpg_shelves
chr4	33257541	33257541	1	*	26.54	51.44	-24.9	control	4.40175	1.07e-05	0.0246755	Pnrc1	mm10_genes_introns
chr4	33257541	33257541	1	*	26.54	51.44	-24.9	control	4.40175	1.07e-05	0.0246755	NA	mm10_cpg_inter
chr7	44257133	44257133	1	*	70.72	95.44	-24.72	control	5.17203	2.32e-07	0.00192291	Gm15517	mm10_genes_1to5kb
chr7	44257133	44257133	1	*	70.72	95.44	-24.72	control	5.17203	2.32e-07	0.00192291	NA	mm10_genes_1to5kb
chr7	44257133	44257133	1	*	70.72	95.44	-24.72	control	5.17203	2.32e-07	0.00192291	Acp4	mm10_genes_exons
chr7	44257133	44257133	1	*	70.72	95.44	-24.72	control	5.17203	2.32e-07	0.00192291	2410002F23Rik	mm10_genes_introns
chr7	44257133	44257133	1	*	70.72	95.44	-24.72	control	5.17203	2.32e-07	0.00192291	NA	mm10_cpg_inter
chr2	161991061	161991061	1	*	75.51	100	-24.49	control	4.40584	1.05e-05	0.0243669	Ptprt	mm10_genes_introns
chr2	161991061	161991061	1	*	75.51	100	-24.49	control	4.40584	1.05e-05	0.0243669	NA	mm10_cpg_inter
chr11	82933377	82933377	1	*	1.19	25.33	-24.14	control	4.70749	2.51e-06	0.0100139	Unc45b	mm10_genes_promoters
chr11	82933377	82933377	1	*	1.19	25.33	-24.14	control	4.70749	2.51e-06	0.0100139	NA	mm10_genes_exons
chr11	82933377	82933377	1	*	1.19	25.33	-24.14	control	4.70749	2.51e-06	0.0100139	Unc45b	mm10_genes_introns
chr11	82933377	82933377	1	*	1.19	25.33	-24.14	control	4.70749	2.51e-06	0.0100139	NA	mm10_cpg_shores
chr1	148081123	148081123	1	*	76	100	-24	control	4.4984	6.85e-06	0.0185056	NA	mm10_cpg_inter
chrX	93290358	93290358	1	*	1.22	25	-23.78	control	4.69367	2.68e-06	0.0103749	Arx	mm10_genes_introns
chrX	93290358	93290358	1	*	1.22	25	-23.78	control	4.69367	2.68e-06	0.0103749	NA	mm10_cpg_shores
chr1	133459362	133459362	1	*	76.47	100	-23.53	control	4.58481	4.54e-06	0.0140903	NA	mm10_cpg_inter
chr18	35860519	35860519	1	*	74.22	97.64	-23.42	control	6.03503	1.59e-09	4.6e-05	NA	mm10_genes_1to5kb
chr18	35860519	35860519	1	*	74.22	97.64	-23.42	control	6.03503	1.59e-09	4.6e-05	Cxxc5	mm10_genes_introns
chr18	35860519	35860519	1	*	74.22	97.64	-23.42	control	6.03503	1.59e-09	4.6e-05	NA	mm10_cpg_islands
chr4	152435834	152435834	1	*	75.51	98.9	-23.39	control	4.45624	8.34e-06	0.0210728	Kcnab2	mm10_genes_1to5kb
chr4	152435834	152435834	1	*	75.51	98.9	-23.39	control	4.45624	8.34e-06	0.0210728	Kcnab2	mm10_genes_5UTRs
chr4	152435834	152435834	1	*	75.51	98.9	-23.39	control	4.45624	8.34e-06	0.0210728	Kcnab2	mm10_genes_exons
chr4	152435834	152435834	1	*	75.51	98.9	-23.39	control	4.45624	8.34e-06	0.0210728	NA	mm10_cpg_inter
chr2	16894857	16894857	1	*	75	97.95	-22.95	control	4.22701	2.37e-05	0.0399415	NA	mm10_cpg_inter
chr13	48756786	48756786	1	*	25.82	48.68	-22.86	control	4.45567	8.36e-06	0.0210728	NA	mm10_cpg_inter
chr18	35860532	35860532	1	*	74.85	97.01	-22.16	control	4.74685	2.07e-06	0.00882903	NA	mm10_genes_1to5kb
chr18	35860532	35860532	1	*	74.85	97.01	-22.16	control	4.74685	2.07e-06	0.00882903	Cxxc5	mm10_genes_introns
chr18	35860532	35860532	1	*	74.85	97.01	-22.16	control	4.74685	2.07e-06	0.00882903	NA	mm10_cpg_islands
chr7	123265702	123265702	1	*	72.62	94.74	-22.12	control	4.16205	3.15e-05	0.047915	Slc5a11	mm10_genes_exons
chr7	123265702	123265702	1	*	72.62	94.74	-22.12	control	4.16205	3.15e-05	0.047915	NA	mm10_cpg_inter
chr19	4083593	4083593	1	*	78.26	100	-21.74	control	4.41453	1.01e-05	0.0239506	Cabp2	mm10_genes_1to5kb
chr19	4083593	4083593	1	*	78.26	100	-21.74	control	4.41453	1.01e-05	0.0239506	Cabp2	mm10_genes_exons
chr19	4083593	4083593	1	*	78.26	100	-21.74	control	4.41453	1.01e-05	0.0239506	Cabp2	mm10_genes_introns
chr19	4083593	4083593	1	*	78.26	100	-21.74	control	4.41453	1.01e-05	0.0239506	NA	mm10_cpg_inter
chrX	15263246	15263246	1	*	77.32	98.04	-20.72	control	4.42212	9.77e-06	0.0235705	NA	mm10_cpg_inter
chr7	82438819	82438819	1	*	79.34	100	-20.66	control	6.43751	1.21e-10	6.82e-06	Adamtsl3	mm10_genes_introns
chr7	82438819	82438819	1	*	79.34	100	-20.66	control	6.43751	1.21e-10	6.82e-06	NA	mm10_cpg_inter
chr6	67694594	67694594	1	*	77.12	97.73	-20.61	control	4.75475	1.99e-06	0.00869521	NA	mm10_cpg_inter
chrX	163723557	163723557	1	*	25.33	45.7	-20.37	control	4.66756	3.05e-06	0.0112416	NA	mm10_cpg_inter
chr2	32455173	32455173	1	*	59.3	79.36	-20.07	control	4.1849	2.85e-05	0.0449413	Slc25a25	mm10_genes_1to5kb
chr2	32455173	32455173	1	*	59.3	79.36	-20.07	control	4.1849	2.85e-05	0.0449413	Naif1	mm10_genes_exons
chr2	32455173	32455173	1	*	59.3	79.36	-20.07	control	4.1849	2.85e-05	0.0449413	NA	mm10_cpg_shelves
chr16	35186752	35186752	1	*	80	100	-20	control	4.40701	1.05e-05	0.0243665	Adcy5	mm10_genes_introns
chr16	35186752	35186752	1	*	80	100	-20	control	4.40701	1.05e-05	0.0243665	NA	mm10_cpg_inter
chr13	60122610	60122610	1	*	35.37	55.18	-19.82	control	6.52943	6.6e-11	4.73e-06	NA	mm10_cpg_inter
chr5	137442043	137442043	1	*	77.36	96.98	-19.63	control	4.86445	1.15e-06	0.00590619	Zan	mm10_genes_exons
chr5	137442043	137442043	1	*	77.36	96.98	-19.63	control	4.86445	1.15e-06	0.00590619	NA	mm10_cpg_inter
chr11	41104399	41104399	1	*	79.66	99.25	-19.59	control	4.65589	3.23e-06	0.011612	NA	mm10_cpg_inter
chr8	109039865	109039865	1	*	42.15	61.65	-19.5	control	5.22922	1.7e-07	0.0015549	NA	mm10_cpg_inter
chr17	15368706	15368706	1	*	80.52	100	-19.48	control	5.23306	1.67e-07	0.00154701	Dll1	mm10_genes_promoters
chr17	15368706	15368706	1	*	80.52	100	-19.48	control	5.23306	1.67e-07	0.00154701	Dll1	mm10_genes_exons
chr17	15368706	15368706	1	*	80.52	100	-19.48	control	5.23306	1.67e-07	0.00154701	NA	mm10_cpg_inter
chr9	119021544	119021544	1	*	48.04	67.44	-19.4	control	5.30801	1.11e-07	0.00115694	Ctdspl	mm10_genes_introns
chr9	119021544	119021544	1	*	48.04	67.44	-19.4	control	5.30801	1.11e-07	0.00115694	NA	mm10_cpg_inter
chr4	154359653	154359653	1	*	22.22	41.4	-19.18	control	4.50051	6.78e-06	0.0184602	Prdm16	mm10_genes_introns
chr4	154359653	154359653	1	*	22.22	41.4	-19.18	control	4.50051	6.78e-06	0.0184602	NA	mm10_cpg_inter
chr15	81700801	81700801	1	*	0	19.1	-19.1	control	4.48417	7.32e-06	0.0194504	Chadl	mm10_genes_1to5kb
chr15	81700801	81700801	1	*	0	19.1	-19.1	control	4.48417	7.32e-06	0.0194504	NA	mm10_cpg_inter
chr9	55616095	55616095	1	*	81.08	100	-18.92	control	4.93329	8.09e-07	0.0046536	Scaper	mm10_genes_introns
chr9	55616095	55616095	1	*	81.08	100	-18.92	control	4.93329	8.09e-07	0.0046536	NA	mm10_cpg_inter
chr8	84872775	84872775	1	*	1.3	19.86	-18.56	control	4.83242	1.35e-06	0.0065275	Syce2	mm10_genes_exons
chr8	84872775	84872775	1	*	1.3	19.86	-18.56	control	4.83242	1.35e-06	0.0065275	NA	mm10_cpg_islands
chr11	100814601	100814601	1	*	35.43	53.98	-18.56	control	4.28712	1.81e-05	0.0339147	Stat5b	mm10_genes_introns
chr11	100814601	100814601	1	*	35.43	53.98	-18.56	control	4.28712	1.81e-05	0.0339147	NA	mm10_cpg_inter
chr14	25651240	25651240	1	*	81.45	100	-18.55	control	6.05851	1.37e-09	4.18e-05	Zmiz1	mm10_genes_exons
chr14	25651240	25651240	1	*	81.45	100	-18.55	control	6.05851	1.37e-09	4.18e-05	NA	mm10_cpg_inter
chr1	148332501	148332501	1	*	76.88	95.05	-18.16	control	4.65343	3.26e-06	0.0116369	NA	mm10_cpg_inter
chr4	43568956	43568956	1	*	79.23	97.1	-17.87	control	5.62172	1.89e-08	0.00030034	Gba2	mm10_genes_exons
chr4	43568956	43568956	1	*	79.23	97.1	-17.87	control	5.62172	1.89e-08	0.00030034	NA	mm10_cpg_inter
chr3	101034753	101034753	1	*	45.02	62.8	-17.79	control	4.47601	7.6e-06	0.0197764	NA	mm10_cpg_inter
chr5	114399105	114399105	1	*	82.43	100	-17.57	control	4.30604	1.66e-05	0.0324266	Ube3b	mm10_genes_1to5kb
chr5	114399105	114399105	1	*	82.43	100	-17.57	control	4.30604	1.66e-05	0.0324266	Ube3b	mm10_genes_introns
chr5	114399105	114399105	1	*	82.43	100	-17.57	control	4.30604	1.66e-05	0.0324266	NA	mm10_cpg_inter
chr10	98751850	98751850	1	*	32.37	49.69	-17.32	control	4.93747	7.91e-07	0.00462648	NA	mm10_cpg_inter
chr1	154118006	154118006	1	*	1.67	18.96	-17.29	control	6.21671	5.08e-10	2.06e-05	NA	mm10_genes_promoters
chr1	154118006	154118006	1	*	1.67	18.96	-17.29	control	6.21671	5.08e-10	2.06e-05	NA	mm10_genes_1to5kb
chr1	154118006	154118006	1	*	1.67	18.96	-17.29	control	6.21671	5.08e-10	2.06e-05	NA	mm10_cpg_inter
chr17	86489900	86489900	1	*	81.38	98.64	-17.26	control	6.66382	2.67e-11	2.79e-06	Prkce	mm10_genes_promoters
chr17	86489900	86489900	1	*	81.38	98.64	-17.26	control	6.66382	2.67e-11	2.79e-06	Prkce	mm10_genes_1to5kb
chr17	86489900	86489900	1	*	81.38	98.64	-17.26	control	6.66382	2.67e-11	2.79e-06	Prkce	mm10_genes_introns
chr17	86489900	86489900	1	*	81.38	98.64	-17.26	control	6.66382	2.67e-11	2.79e-06	NA	mm10_cpg_inter
chr6	81995848	81995848	1	*	82.8	100	-17.2	control	4.92769	8.32e-07	0.0046536	NA	mm10_cpg_inter
chr7	111471877	111471877	1	*	81.9	99.09	-17.19	control	4.63946	3.49e-06	0.0121901	Galnt18	mm10_genes_exons
chr7	111471877	111471877	1	*	81.9	99.09	-17.19	control	4.63946	3.49e-06	0.0121901	Galnt18	mm10_genes_3UTRs
chr7	111471877	111471877	1	*	81.9	99.09	-17.19	control	4.63946	3.49e-06	0.0121901	NA	mm10_cpg_inter
chr9	45405639	45405639	1	*	51.45	68.31	-16.86	control	4.43181	9.34e-06	0.0228477	Fxyd2	mm10_genes_promoters
chr9	45405639	45405639	1	*	51.45	68.31	-16.86	control	4.43181	9.34e-06	0.0228477	Fxyd2	mm10_genes_1to5kb
chr9	45405639	45405639	1	*	51.45	68.31	-16.86	control	4.43181	9.34e-06	0.0228477	Fxyd2	mm10_genes_introns
chr9	45405639	45405639	1	*	51.45	68.31	-16.86	control	4.43181	9.34e-06	0.0228477	NA	mm10_cpg_inter
chr9	21181827	21181827	1	*	12.91	29.63	-16.72	control	5.54213	2.99e-08	0.000419916	Pde4a	mm10_genes_1to5kb
chr9	21181827	21181827	1	*	12.91	29.63	-16.72	control	5.54213	2.99e-08	0.000419916	Pde4a	mm10_genes_introns
chr9	21181827	21181827	1	*	12.91	29.63	-16.72	control	5.54213	2.99e-08	0.000419916	NA	mm10_cpg_islands
chr11	27417343	27417343	1	*	82.61	99.08	-16.47	control	4.17575	2.97e-05	0.0457873	NA	mm10_cpg_inter
chr2	172677868	172677868	1	*	81.21	97.55	-16.34	control	5.41613	6.09e-08	0.000717784	NA	mm10_cpg_inter
chr3	146944161	146944161	1	*	83.91	100	-16.09	control	5.08537	3.67e-07	0.00262859	Ttll7	mm10_genes_exons
chr3	146944161	146944161	1	*	83.91	100	-16.09	control	5.08537	3.67e-07	0.00262859	NA	mm10_cpg_inter
chr9	116384524	116384524	1	*	18.71	34.56	-15.85	control	4.97836	6.41e-07	0.00393769	NA	mm10_cpg_inter
chr10	30327912	30327912	1	*	75.54	91.34	-15.8	control	4.85189	1.22e-06	0.00609687	NA	mm10_cpg_inter
chr6	126944091	126944091	1	*	79.32	95.07	-15.76	control	4.47797	7.54e-06	0.019666	Rad51ap1	mm10_genes_1to5kb
chr6	126944091	126944091	1	*	79.32	95.07	-15.76	control	4.47797	7.54e-06	0.019666	D6Wsu163e	mm10_genes_introns
chr6	126944091	126944091	1	*	79.32	95.07	-15.76	control	4.47797	7.54e-06	0.019666	NA	mm10_cpg_inter
chr13	75449236	75449236	1	*	84.07	99.59	-15.52	control	5.77637	7.63e-09	0.000159359	NA	mm10_cpg_inter
chr4	139252309	139252309	1	*	28.29	43.72	-15.42	control	4.88336	1.04e-06	0.00540487	Capzb	mm10_genes_introns
chr4	139252309	139252309	1	*	28.29	43.72	-15.42	control	4.88336	1.04e-06	0.00540487	NA	mm10_cpg_inter
chr8	122767052	122767052	1	*	74.3	89.69	-15.39	control	4.26075	2.04e-05	0.03667	A530010L16Rik	mm10_genes_1to5kb
chr8	122767052	122767052	1	*	74.3	89.69	-15.39	control	4.26075	2.04e-05	0.03667	Galnt2	mm10_genes_introns
chr8	122767052	122767052	1	*	74.3	89.69	-15.39	control	4.26075	2.04e-05	0.03667	NA	mm10_cpg_inter
chr14	16200999	16200999	1	*	28.95	44.09	-15.14	control	5.70634	1.15e-08	0.000200826	NA	mm10_cpg_inter
chrX	91841356	91841356	1	*	81.34	96.43	-15.09	control	4.18161	2.89e-05	0.0450213	NA	mm10_cpg_inter
chr15	97246286	97246286	1	*	53.55	68.57	-15.02	control	4.49789	6.86e-06	0.0185056	Pced1b	mm10_genes_promoters
chr15	97246286	97246286	1	*	53.55	68.57	-15.02	control	4.49789	6.86e-06	0.0185056	Pced1b	mm10_genes_1to5kb
chr15	97246286	97246286	1	*	53.55	68.57	-15.02	control	4.49789	6.86e-06	0.0185056	Amigo2	mm10_genes_exons
chr15	97246286	97246286	1	*	53.55	68.57	-15.02	control	4.49789	6.86e-06	0.0185056	NA	mm10_cpg_shores
chr19	42398466	42398466	1	*	83.66	98.59	-14.93	control	4.16027	3.18e-05	0.04819	Crtac1	mm10_genes_introns
chr19	42398466	42398466	1	*	83.66	98.59	-14.93	control	4.16027	3.18e-05	0.04819	NA	mm10_cpg_inter
chr8	48482285	48482285	1	*	62.8	77.69	-14.89	control	4.75273	2.01e-06	0.00869521	Tenm3	mm10_genes_introns
chr8	48482285	48482285	1	*	62.8	77.69	-14.89	control	4.75273	2.01e-06	0.00869521	NA	mm10_cpg_inter
chr13	21935987	21935987	1	*	9.59	24.41	-14.81	control	5.00373	5.62e-07	0.00351198	NA	mm10_cpg_inter
chr2	112261533	112261533	1	*	65.59	80.37	-14.77	control	4.81614	1.46e-06	0.00690005	Nop10	mm10_genes_promoters
chr2	112261533	112261533	1	*	65.59	80.37	-14.77	control	4.81614	1.46e-06	0.00690005	Slc12a6	mm10_genes_1to5kb
chr2	112261533	112261533	1	*	65.59	80.37	-14.77	control	4.81614	1.46e-06	0.00690005	Nutm1	mm10_genes_1to5kb
chr2	112261533	112261533	1	*	65.59	80.37	-14.77	control	4.81614	1.46e-06	0.00690005	NA	mm10_cpg_shelves
chr17	47820852	47820852	1	*	82.69	97.03	-14.34	control	4.22685	2.37e-05	0.0399415	Mdfi	mm10_genes_exons
chr17	47820852	47820852	1	*	82.69	97.03	-14.34	control	4.22685	2.37e-05	0.0399415	NA	mm10_cpg_inter
chr6	105548332	105548332	1	*	51.15	65.43	-14.29	control	4.41649	1e-05	0.0239506	NA	mm10_cpg_inter
chr6	95676644	95676644	1	*	42.58	56.78	-14.2	control	4.40701	1.05e-05	0.0243665	Suclg2	mm10_genes_introns
chr6	95676644	95676644	1	*	42.58	56.78	-14.2	control	4.40701	1.05e-05	0.0243665	NA	mm10_cpg_inter
chr6	118924493	118924493	1	*	68.18	82.26	-14.08	control	4.24984	2.14e-05	0.037781	Cacna1c	mm10_genes_introns
chr6	118924493	118924493	1	*	68.18	82.26	-14.08	control	4.24984	2.14e-05	0.037781	NA	mm10_cpg_inter
chr2	84741146	84741146	1	*	12.36	26.42	-14.06	control	4.42861	9.48e-06	0.0231013	Mir130a	mm10_genes_exons
chr2	84741146	84741146	1	*	12.36	26.42	-14.06	control	4.42861	9.48e-06	0.0231013	NA	mm10_cpg_shelves
chr2	105845747	105845747	1	*	85.04	99.05	-14	control	5.91554	3.31e-09	7.8e-05	Elp4	mm10_genes_introns
chr2	105845747	105845747	1	*	85.04	99.05	-14	control	5.91554	3.31e-09	7.8e-05	NA	mm10_cpg_inter
chr1	87173726	87173726	1	*	52.43	66.23	-13.8	control	4.80906	1.52e-06	0.00705809	NA	mm10_cpg_inter
chr15	72767371	72767371	1	*	85.59	99.37	-13.78	control	4.86067	1.17e-06	0.00597828	Trappc9	mm10_genes_introns
chr15	72767371	72767371	1	*	85.59	99.37	-13.78	control	4.86067	1.17e-06	0.00597828	NA	mm10_cpg_inter
chr17	66869786	66869786	1	*	76.52	90.2	-13.67	control	5.26998	1.36e-07	0.00134731	Ptprm	mm10_genes_introns
chr17	66869786	66869786	1	*	76.52	90.2	-13.67	control	5.26998	1.36e-07	0.00134731	NA	mm10_cpg_inter
chr8	70505914	70505914	1	*	2.01	15.58	-13.57	control	5.27297	1.34e-07	0.0013437	Rex1bd	mm10_genes_exons
chr8	70505914	70505914	1	*	2.01	15.58	-13.57	control	5.27297	1.34e-07	0.0013437	NA	mm10_cpg_islands
chr15	76853470	76853470	1	*	67.87	81.01	-13.13	control	4.38309	1.17e-05	0.025831	Zfp251	mm10_genes_exons
chr15	76853470	76853470	1	*	67.87	81.01	-13.13	control	4.38309	1.17e-05	0.025831	NA	mm10_cpg_inter
chr4	40933939	40933939	1	*	57.04	70.09	-13.04	control	4.23935	2.24e-05	0.0389862	NA	mm10_cpg_inter
chr7	143460242	143460242	1	*	8.84	21.83	-12.99	control	5.10065	3.38e-07	0.00244891	Cdkn1c	mm10_genes_promoters
chr7	143460242	143460242	1	*	8.84	21.83	-12.99	control	5.10065	3.38e-07	0.00244891	Cdkn1c	mm10_genes_exons
chr7	143460242	143460242	1	*	8.84	21.83	-12.99	control	5.10065	3.38e-07	0.00244891	NA	mm10_genes_introns
chr7	143460242	143460242	1	*	8.84	21.83	-12.99	control	5.10065	3.38e-07	0.00244891	NA	mm10_cpg_islands
chr17	15377124	15377124	1	*	2.89	15.82	-12.92	control	5.14783	2.64e-07	0.00207056	Dll1	mm10_genes_promoters
chr17	15377124	15377124	1	*	2.89	15.82	-12.92	control	5.14783	2.64e-07	0.00207056	Dll1	mm10_genes_1to5kb
chr17	15377124	15377124	1	*	2.89	15.82	-12.92	control	5.14783	2.64e-07	0.00207056	NA	mm10_cpg_shores
chr9	107527153	107527153	1	*	3.17	16.09	-12.92	control	4.54261	5.56e-06	0.0160751	Cacna2d2	mm10_genes_exons
chr9	107527153	107527153	1	*	3.17	16.09	-12.92	control	4.54261	5.56e-06	0.0160751	Cacna2d2	mm10_genes_introns
chr9	107527153	107527153	1	*	3.17	16.09	-12.92	control	4.54261	5.56e-06	0.0160751	NA	mm10_cpg_islands
chr15	100933779	100933779	1	*	65.5	78.3	-12.8	control	4.38622	1.15e-05	0.0256957	Scn8a	mm10_genes_1to5kb
chr15	100933779	100933779	1	*	65.5	78.3	-12.8	control	4.38622	1.15e-05	0.0256957	Scn8a	mm10_genes_introns
chr15	100933779	100933779	1	*	65.5	78.3	-12.8	control	4.38622	1.15e-05	0.0256957	NA	mm10_cpg_inter
chr15	76293761	76293761	1	*	51.41	64.14	-12.73	control	4.1419	3.44e-05	0.0498413	Smpd5	mm10_genes_promoters
chr15	76293761	76293761	1	*	51.41	64.14	-12.73	control	4.1419	3.44e-05	0.0498413	Smpd5	mm10_genes_1to5kb
chr15	76293761	76293761	1	*	51.41	64.14	-12.73	control	4.1419	3.44e-05	0.0498413	Mir3079	mm10_genes_1to5kb
chr15	76293761	76293761	1	*	51.41	64.14	-12.73	control	4.1419	3.44e-05	0.0498413	NA	mm10_cpg_shores
chr14	101843805	101843805	1	*	50.77	63.49	-12.72	control	4.23945	2.24e-05	0.0389862	Lmo7	mm10_genes_introns
chr14	101843805	101843805	1	*	50.77	63.49	-12.72	control	4.23945	2.24e-05	0.0389862	NA	mm10_cpg_inter
chrX	104348375	104348375	1	*	87.29	100	-12.71	control	4.66562	3.08e-06	0.0112416	NA	mm10_genes_promoters
chrX	104348375	104348375	1	*	87.29	100	-12.71	control	4.66562	3.08e-06	0.0112416	Abcb7	mm10_genes_introns
chrX	104348375	104348375	1	*	87.29	100	-12.71	control	4.66562	3.08e-06	0.0112416	NA	mm10_cpg_islands
chr18	43501378	43501378	1	*	69.09	81.77	-12.67	control	4.58362	4.57e-06	0.0140903	NA	mm10_cpg_inter
chr11	90599799	90599799	1	*	84.41	96.9	-12.49	control	4.2362	2.27e-05	0.0389945	Stxbp4	mm10_genes_exons
chr11	90599799	90599799	1	*	84.41	96.9	-12.49	control	4.2362	2.27e-05	0.0389945	Stxbp4	mm10_genes_introns
chr11	90599799	90599799	1	*	84.41	96.9	-12.49	control	4.2362	2.27e-05	0.0389945	Stxbp4	mm10_genes_3UTRs
chr11	90599799	90599799	1	*	84.41	96.9	-12.49	control	4.2362	2.27e-05	0.0389945	NA	mm10_cpg_inter
chr17	34023009	34023009	1	*	85.71	98.16	-12.45	control	4.38671	1.15e-05	0.0256957	Mir219c	mm10_genes_1to5kb
chr17	34023009	34023009	1	*	85.71	98.16	-12.45	control	4.38671	1.15e-05	0.0256957	Ring1	mm10_genes_exons
chr17	34023009	34023009	1	*	85.71	98.16	-12.45	control	4.38671	1.15e-05	0.0256957	NA	mm10_cpg_shores
chr8	108957005	108957005	1	*	73.24	85.42	-12.18	control	4.69013	2.73e-06	0.0104759	Zfhx3	mm10_genes_exons
chr8	108957005	108957005	1	*	73.24	85.42	-12.18	control	4.69013	2.73e-06	0.0104759	NA	mm10_cpg_islands
chr5	52368556	52368556	1	*	0.81	12.87	-12.05	control	4.66621	3.07e-06	0.0112416	Sod3	mm10_genes_exons
chr5	52368556	52368556	1	*	0.81	12.87	-12.05	control	4.66621	3.07e-06	0.0112416	NA	mm10_cpg_islands
chr4	140717087	140717087	1	*	86.18	98.17	-11.99	control	4.31166	1.62e-05	0.0319146	Rcc2	mm10_genes_exons
chr4	140717087	140717087	1	*	86.18	98.17	-11.99	control	4.31166	1.62e-05	0.0319146	NA	mm10_genes_exons
chr4	140717087	140717087	1	*	86.18	98.17	-11.99	control	4.31166	1.62e-05	0.0319146	NA	mm10_cpg_inter
chr12	83018928	83018928	1	*	79.45	91.31	-11.86	control	4.69938	2.61e-06	0.0102519	Rgs6	mm10_genes_introns
chr12	83018928	83018928	1	*	79.45	91.31	-11.86	control	4.69938	2.61e-06	0.0102519	NA	mm10_cpg_inter
chr12	12694537	12694537	1	*	75.45	87.29	-11.84	control	5.02534	5.03e-07	0.00324973	NA	mm10_cpg_inter
chr10	125861586	125861586	1	*	45.15	56.94	-11.79	control	4.63164	3.63e-06	0.012446	NA	mm10_cpg_inter
chr7	6977375	6977375	1	*	70.97	82.7	-11.73	control	4.26519	2e-05	0.0360378	Zim3	mm10_genes_promoters
chr7	6977375	6977375	1	*	70.97	82.7	-11.73	control	4.26519	2e-05	0.0360378	NA	mm10_genes_1to5kb
chr7	6977375	6977375	1	*	70.97	82.7	-11.73	control	4.26519	2e-05	0.0360378	Zim3	mm10_genes_1to5kb
chr7	6977375	6977375	1	*	70.97	82.7	-11.73	control	4.26519	2e-05	0.0360378	NA	mm10_genes_exons
chr7	6977375	6977375	1	*	70.97	82.7	-11.73	control	4.26519	2e-05	0.0360378	Zim3	mm10_genes_exons
chr7	6977375	6977375	1	*	70.97	82.7	-11.73	control	4.26519	2e-05	0.0360378	NA	mm10_cpg_islands
chr9	22360879	22360879	1	*	88.41	100	-11.59	control	5.29335	1.2e-07	0.00121885	Anln	mm10_genes_1to5kb
chr9	22360879	22360879	1	*	88.41	100	-11.59	control	5.29335	1.2e-07	0.00121885	Anln	mm10_genes_exons
chr9	22360879	22360879	1	*	88.41	100	-11.59	control	5.29335	1.2e-07	0.00121885	NA	mm10_cpg_inter
chr8	119632959	119632959	1	*	60.44	72.01	-11.57	control	4.19788	2.69e-05	0.0437508	Kcng4	mm10_genes_exons
chr8	119632959	119632959	1	*	60.44	72.01	-11.57	control	4.19788	2.69e-05	0.0437508	NA	mm10_cpg_islands
chr10	123859729	123859729	1	*	87.76	99.28	-11.53	control	4.30577	1.66e-05	0.0324266	NA	mm10_cpg_inter
chr11	82434993	82434993	1	*	0.32	11.73	-11.41	control	6.4822	9.04e-11	5.5e-06	Tmem132e	mm10_genes_1to5kb
chr11	82434993	82434993	1	*	0.32	11.73	-11.41	control	6.4822	9.04e-11	5.5e-06	Tmem132e	mm10_genes_exons
chr11	82434993	82434993	1	*	0.32	11.73	-11.41	control	6.4822	9.04e-11	5.5e-06	NA	mm10_cpg_islands
chr9	44020835	44020835	1	*	79.78	91.15	-11.38	control	4.7727	1.82e-06	0.008149	NA	mm10_genes_introns
chr9	44020835	44020835	1	*	79.78	91.15	-11.38	control	4.7727	1.82e-06	0.008149	NA	mm10_cpg_islands
chr5	143254928	143254928	1	*	37.11	48.49	-11.38	control	4.19372	2.74e-05	0.0441684	Zfp316	mm10_genes_exons
chr5	143254928	143254928	1	*	37.11	48.49	-11.38	control	4.19372	2.74e-05	0.0441684	NA	mm10_genes_exons
chr5	143254928	143254928	1	*	37.11	48.49	-11.38	control	4.19372	2.74e-05	0.0441684	NA	mm10_cpg_islands
chr7	61844926	61844926	1	*	87.86	99.21	-11.35	control	4.96432	6.89e-07	0.00416344	A230057D06Rik	mm10_genes_introns
chr7	61844926	61844926	1	*	87.86	99.21	-11.35	control	4.96432	6.89e-07	0.00416344	NA	mm10_cpg_inter
chr4	131900829	131900829	1	*	88.66	100	-11.34	control	6.00326	1.93e-09	4.87e-05	Srsf4	mm10_genes_exons
chr4	131900829	131900829	1	*	88.66	100	-11.34	control	6.00326	1.93e-09	4.87e-05	Gm12992	mm10_genes_exons
chr4	131900829	131900829	1	*	88.66	100	-11.34	control	6.00326	1.93e-09	4.87e-05	NA	mm10_cpg_inter
chr10	21494427	21494427	1	*	83.48	94.72	-11.24	control	6.18588	6.18e-10	2.38e-05	NA	mm10_cpg_inter
chr17	47314883	47314883	1	*	86.62	97.74	-11.11	control	4.17888	2.93e-05	0.0454324	Trerf1	mm10_genes_exons
chr17	47314883	47314883	1	*	86.62	97.74	-11.11	control	4.17888	2.93e-05	0.0454324	NA	mm10_cpg_inter
chr8	70131936	70131936	1	*	19.74	30.83	-11.09	control	5.52817	3.24e-08	0.000446144	Nr2c2ap	mm10_genes_exons
chr8	70131936	70131936	1	*	19.74	30.83	-11.09	control	5.52817	3.24e-08	0.000446144	Rfxank	mm10_genes_exons
chr8	70131936	70131936	1	*	19.74	30.83	-11.09	control	5.52817	3.24e-08	0.000446144	Rfxank	mm10_genes_3UTRs
chr8	70131936	70131936	1	*	19.74	30.83	-11.09	control	5.52817	3.24e-08	0.000446144	NA	mm10_cpg_shores
chr7	16885240	16885240	1	*	18.96	30.05	-11.09	control	4.27645	1.9e-05	0.0350418	Dact3	mm10_genes_exons
chr7	16885240	16885240	1	*	18.96	30.05	-11.09	control	4.27645	1.9e-05	0.0350418	NA	mm10_cpg_islands
chr5	112728748	112728748	1	*	74.69	85.65	-10.97	control	4.50925	6.51e-06	0.0178049	Myo18b	mm10_genes_introns
chr5	112728748	112728748	1	*	74.69	85.65	-10.97	control	4.50925	6.51e-06	0.0178049	NA	mm10_cpg_inter
chr16	95552840	95552840	1	*	58.67	69.58	-10.91	control	4.22148	2.43e-05	0.040399	Erg	mm10_genes_introns
chr16	95552840	95552840	1	*	58.67	69.58	-10.91	control	4.22148	2.43e-05	0.040399	NA	mm10_cpg_inter
chr16	83340273	83340273	1	*	87.87	98.67	-10.8	control	5.72391	1.04e-08	0.000190827	NA	mm10_cpg_inter
chr5	118990858	118990858	1	*	44.72	55.5	-10.78	control	4.40305	1.07e-05	0.0246049	NA	mm10_cpg_inter
chr9	107527070	107527070	1	*	0.49	11.18	-10.69	control	4.93833	7.88e-07	0.00462648	Cacna2d2	mm10_genes_introns
chr9	107527070	107527070	1	*	0.49	11.18	-10.69	control	4.93833	7.88e-07	0.00462648	NA	mm10_cpg_shores
chr3	88545181	88545181	1	*	41.89	52.49	-10.59	control	4.17072	3.04e-05	0.0466132	Rab25	mm10_genes_1to5kb
chr3	88545181	88545181	1	*	41.89	52.49	-10.59	control	4.17072	3.04e-05	0.0466132	Rab25	mm10_genes_5UTRs
chr3	88545181	88545181	1	*	41.89	52.49	-10.59	control	4.17072	3.04e-05	0.0466132	Rab25	mm10_genes_exons
chr3	88545181	88545181	1	*	41.89	52.49	-10.59	control	4.17072	3.04e-05	0.0466132	NA	mm10_cpg_inter
chr7	112950682	112950682	1	*	80.94	91.43	-10.49	control	4.33578	1.45e-05	0.0295671	Rassf10	mm10_genes_1to5kb
chr7	112950682	112950682	1	*	80.94	91.43	-10.49	control	4.33578	1.45e-05	0.0295671	NA	mm10_cpg_shelves
chr3	11973110	11973110	1	*	76.74	87.23	-10.49	control	4.16345	3.13e-05	0.0478213	NA	mm10_cpg_inter
chr19	7439901	7439901	1	*	87.46	97.83	-10.37	control	5.43613	5.44e-08	0.000652256	Rtn3	mm10_genes_introns
chr19	7439901	7439901	1	*	87.46	97.83	-10.37	control	5.43613	5.44e-08	0.000652256	NA	mm10_cpg_inter
chr8	107602640	107602640	1	*	79.95	90.23	-10.28	control	4.24971	2.14e-05	0.037781	NA	mm10_cpg_inter
chr10	19102067	19102067	1	*	89.02	99.29	-10.26	control	5.05134	4.39e-07	0.00291442	NA	mm10_genes_promoters
chr10	19102067	19102067	1	*	89.02	99.29	-10.26	control	5.05134	4.39e-07	0.00291442	NA	mm10_genes_exons
chr10	19102067	19102067	1	*	89.02	99.29	-10.26	control	5.05134	4.39e-07	0.00291442	NA	mm10_cpg_inter
chr10	115212278	115212278	1	*	89.35	99.58	-10.23	control	5.04656	4.5e-07	0.0029481	Tbc1d15	mm10_genes_1to5kb
chr10	115212278	115212278	1	*	89.35	99.58	-10.23	control	5.04656	4.5e-07	0.0029481	Tbc1d15	mm10_genes_introns
chr10	115212278	115212278	1	*	89.35	99.58	-10.23	control	5.04656	4.5e-07	0.0029481	NA	mm10_cpg_inter
chr5	103208247	103208247	1	*	64.75	74.98	-10.22	control	4.1816	2.89e-05	0.0450213	Mapk10	mm10_genes_1to5kb
chr5	103208247	103208247	1	*	64.75	74.98	-10.22	control	4.1816	2.89e-05	0.0450213	Mapk10	mm10_genes_introns
chr5	103208247	103208247	1	*	64.75	74.98	-10.22	control	4.1816	2.89e-05	0.0450213	NA	mm10_cpg_inter
chr19	52922896	52922896	1	*	54.05	64.2	-10.16	control	4.37298	1.23e-05	0.0264964	AA387883	mm10_genes_promoters
chr19	52922896	52922896	1	*	54.05	64.2	-10.16	control	4.37298	1.23e-05	0.0264964	NA	mm10_cpg_inter
chr7	16731868	16731868	1	*	85.09	95.2	-10.1	control	4.42389	9.69e-06	0.0234907	NA	mm10_cpg_inter
chr2	72514177	72514177	1	*	85.34	95.4	-10.06	control	4.14578	3.39e-05	0.0498413	NA	mm10_cpg_inter
chr11	113811830	113811830	1	*	22.34	12.33	10.01	Lead	4.28526	1.83e-05	0.0341118	Sdk2	mm10_genes_1to5kb
chr11	113811830	113811830	1	*	22.34	12.33	10.01	Lead	4.28526	1.83e-05	0.0341118	Sdk2	mm10_genes_introns
chr11	113811830	113811830	1	*	22.34	12.33	10.01	Lead	4.28526	1.83e-05	0.0341118	NA	mm10_cpg_inter
chr4	148068412	148068412	1	*	57.68	47.63	10.05	Lead	4.59675	4.29e-06	0.0136934	NA	mm10_genes_exons
chr4	148068412	148068412	1	*	57.68	47.63	10.05	Lead	4.59675	4.29e-06	0.0136934	NA	mm10_cpg_islands
chr9	46352502	46352502	1	*	35.12	25.02	10.09	Lead	4.49138	7.08e-06	0.0189413	NA	mm10_genes_introns
chr9	46352502	46352502	1	*	35.12	25.02	10.09	Lead	4.49138	7.08e-06	0.0189413	NA	mm10_cpg_inter
chr9	118397944	118397944	1	*	91.73	81.56	10.17	Lead	5.0457	4.52e-07	0.0029481	NA	mm10_cpg_inter
chr10	126943550	126943550	1	*	85.89	75.62	10.27	Lead	4.38057	1.18e-05	0.0258747	NA	mm10_cpg_inter
chr7	45632376	45632376	1	*	62.17	51.88	10.29	Lead	4.14907	3.34e-05	0.0494808	Rasip1	mm10_genes_exons
chr7	45632376	45632376	1	*	62.17	51.88	10.29	Lead	4.14907	3.34e-05	0.0494808	NA	mm10_genes_introns
chr7	45632376	45632376	1	*	62.17	51.88	10.29	Lead	4.14907	3.34e-05	0.0494808	NA	mm10_cpg_islands
chrX	137104800	137104800	1	*	11.05	0.68	10.36	Lead	4.22898	2.35e-05	0.0399415	NA	mm10_genes_promoters
chrX	137104800	137104800	1	*	11.05	0.68	10.36	Lead	4.22898	2.35e-05	0.0399415	NA	mm10_genes_1to5kb
chrX	137104800	137104800	1	*	11.05	0.68	10.36	Lead	4.22898	2.35e-05	0.0399415	NA	mm10_cpg_inter
chr10	13061109	13061109	1	*	22.69	12.27	10.41	Lead	4.75239	2.01e-06	0.00869521	Plagl1	mm10_genes_introns
chr10	13061109	13061109	1	*	22.69	12.27	10.41	Lead	4.75239	2.01e-06	0.00869521	NA	mm10_cpg_islands
chr13	53099810	53099810	1	*	31.08	20.66	10.41	Lead	4.34072	1.42e-05	0.0293055	NA	mm10_cpg_inter
chr1	182748858	182748858	1	*	88.7	78.19	10.52	Lead	5.49707	3.86e-08	0.000495055	Ccdc185	mm10_genes_exons
chr1	182748858	182748858	1	*	88.7	78.19	10.52	Lead	5.49707	3.86e-08	0.000495055	NA	mm10_cpg_inter
chr13	36735177	36735177	1	*	11.32	0.78	10.54	Lead	4.75459	1.99e-06	0.00869521	Nrn1	mm10_genes_promoters
chr13	36735177	36735177	1	*	11.32	0.78	10.54	Lead	4.75459	1.99e-06	0.00869521	Nrn1	mm10_genes_1to5kb
chr13	36735177	36735177	1	*	11.32	0.78	10.54	Lead	4.75459	1.99e-06	0.00869521	NA	mm10_cpg_islands
chr1	38597092	38597092	1	*	68.88	58.33	10.55	Lead	4.58569	4.52e-06	0.0140903	Aff3	mm10_genes_introns
chr1	38597092	38597092	1	*	68.88	58.33	10.55	Lead	4.58569	4.52e-06	0.0140903	NA	mm10_cpg_inter
chrX	42357742	42357742	1	*	95.65	85.08	10.57	Lead	4.38017	1.19e-05	0.0258747	NA	mm10_cpg_inter
chr18	76145968	76145968	1	*	81	70.42	10.58	Lead	4.22605	2.38e-05	0.0399415	Zbtb7c	mm10_genes_exons
chr18	76145968	76145968	1	*	81	70.42	10.58	Lead	4.22605	2.38e-05	0.0399415	NA	mm10_cpg_islands
chr5	6222588	6222588	1	*	79.03	68.37	10.66	Lead	4.15422	3.26e-05	0.0487752	NA	mm10_cpg_inter
chr7	16885465	16885465	1	*	26.12	15.39	10.73	Lead	4.22648	2.37e-05	0.0399415	Dact3	mm10_genes_exons
chr7	16885465	16885465	1	*	26.12	15.39	10.73	Lead	4.22648	2.37e-05	0.0399415	NA	mm10_cpg_islands
chr13	119810492	119810492	1	*	84.94	74.08	10.86	Lead	4.72379	2.31e-06	0.00939769	NA	mm10_genes_1to5kb
chr13	119810492	119810492	1	*	84.94	74.08	10.86	Lead	4.72379	2.31e-06	0.00939769	NA	mm10_cpg_inter
chr4	39823945	39823945	1	*	95.4	84.32	11.09	Lead	6.23715	4.46e-10	2.04e-05	NA	mm10_genes_exons
chr4	39823945	39823945	1	*	95.4	84.32	11.09	Lead	6.23715	4.46e-10	2.04e-05	NA	mm10_cpg_inter
chr11	105113203	105113203	1	*	40.72	29.55	11.17	Lead	4.85391	1.21e-06	0.00609687	Efcab3	mm10_genes_introns
chr11	105113203	105113203	1	*	40.72	29.55	11.17	Lead	4.85391	1.21e-06	0.00609687	NA	mm10_cpg_inter
chr1	165091789	165091789	1	*	18.82	7.6	11.22	Lead	4.53591	5.74e-06	0.0164547	4930568G15Rik	mm10_genes_introns
chr1	165091789	165091789	1	*	18.82	7.6	11.22	Lead	4.53591	5.74e-06	0.0164547	NA	mm10_cpg_inter
chr9	119477760	119477760	1	*	16.85	5.56	11.3	Lead	4.66212	3.13e-06	0.011378	NA	mm10_cpg_inter
chr7	135837161	135837161	1	*	14.19	2.86	11.34	Lead	4.32799	1.5e-05	0.0302919	NA	mm10_cpg_inter
chr2	60901527	60901527	1	*	22.62	11.25	11.37	Lead	4.1545	3.26e-05	0.0487752	Rbms1	mm10_genes_introns
chr2	60901527	60901527	1	*	22.62	11.25	11.37	Lead	4.1545	3.26e-05	0.0487752	NA	mm10_cpg_inter
chr8	125328119	125328119	1	*	61.43	49.85	11.59	Lead	4.75232	2.01e-06	0.00869521	NA	mm10_cpg_inter
chr11	104625502	104625502	1	*	24.73	13.13	11.6	Lead	4.94069	7.78e-07	0.00462468	Itgb3	mm10_genes_introns
chr11	104625502	104625502	1	*	24.73	13.13	11.6	Lead	4.94069	7.78e-07	0.00462468	NA	mm10_cpg_inter
chr9	108960217	108960217	1	*	47.02	35.06	11.96	Lead	4.2315	2.32e-05	0.0397254	Col7a1	mm10_genes_exons
chr9	108960217	108960217	1	*	47.02	35.06	11.96	Lead	4.2315	2.32e-05	0.0397254	NA	mm10_cpg_inter
chr8	83669122	83669122	1	*	97.8	85.74	12.06	Lead	7.11009	1.16e-12	2.12e-07	Ptger1	mm10_genes_exons
chr8	83669122	83669122	1	*	97.8	85.74	12.06	Lead	7.11009	1.16e-12	2.12e-07	Pkn1	mm10_genes_exons
chr8	83669122	83669122	1	*	97.8	85.74	12.06	Lead	7.11009	1.16e-12	2.12e-07	Ptger1	mm10_genes_introns
chr8	83669122	83669122	1	*	97.8	85.74	12.06	Lead	7.11009	1.16e-12	2.12e-07	NA	mm10_genes_introns
chr8	83669122	83669122	1	*	97.8	85.74	12.06	Lead	7.11009	1.16e-12	2.12e-07	Pkn1	mm10_genes_3UTRs
chr8	83669122	83669122	1	*	97.8	85.74	12.06	Lead	7.11009	1.16e-12	2.12e-07	NA	mm10_cpg_shores
chr11	96260587	96260587	1	*	12.07	0	12.07	Lead	5.18722	2.13e-07	0.00185783	Gm53	mm10_genes_1to5kb
chr11	96260587	96260587	1	*	12.07	0	12.07	Lead	5.18722	2.13e-07	0.00185783	Mir196a-1	mm10_genes_1to5kb
chr11	96260587	96260587	1	*	12.07	0	12.07	Lead	5.18722	2.13e-07	0.00185783	Gm53	mm10_genes_introns
chr11	96260587	96260587	1	*	12.07	0	12.07	Lead	5.18722	2.13e-07	0.00185783	NA	mm10_cpg_inter
chr2	70096533	70096533	1	*	36.66	24.56	12.1	Lead	4.3102	1.63e-05	0.0319534	Myo3b	mm10_genes_introns
chr2	70096533	70096533	1	*	36.66	24.56	12.1	Lead	4.3102	1.63e-05	0.0319534	NA	mm10_cpg_inter
chr6	7394807	7394807	1	*	92.19	80	12.19	Lead	4.55221	5.31e-06	0.015698	NA	mm10_cpg_inter
chr10	99311635	99311635	1	*	86.92	74.66	12.26	Lead	4.4859	7.26e-06	0.0193637	NA	mm10_genes_introns
chr10	99311635	99311635	1	*	86.92	74.66	12.26	Lead	4.4859	7.26e-06	0.0193637	NA	mm10_cpg_inter
chr4	136836717	136836717	1	*	12.39	0	12.39	Lead	4.43974	9.01e-06	0.0225391	Ephb2	mm10_genes_promoters
chr4	136836717	136836717	1	*	12.39	0	12.39	Lead	4.43974	9.01e-06	0.0225391	NA	mm10_cpg_shores
chr9	108172671	108172671	1	*	72.32	59.89	12.43	Lead	6.10568	1.02e-09	3.4e-05	Bsn	mm10_genes_introns
chr9	108172671	108172671	1	*	72.32	59.89	12.43	Lead	6.10568	1.02e-09	3.4e-05	NA	mm10_cpg_inter
chr4	147187855	147187855	1	*	65.86	53.33	12.53	Lead	4.30307	1.68e-05	0.0326498	NA	mm10_genes_exons
chr4	147187855	147187855	1	*	65.86	53.33	12.53	Lead	4.30307	1.68e-05	0.0326498	NA	mm10_cpg_islands
chr7	81701832	81701832	1	*	73.67	61.03	12.64	Lead	4.36198	1.29e-05	0.0272998	Homer2	mm10_genes_introns
chr7	81701832	81701832	1	*	73.67	61.03	12.64	Lead	4.36198	1.29e-05	0.0272998	NA	mm10_cpg_inter
chr5	64696315	64696315	1	*	62.26	49.55	12.72	Lead	5.32658	1e-07	0.00109078	NA	mm10_genes_exons
chr5	64696315	64696315	1	*	62.26	49.55	12.72	Lead	5.32658	1e-07	0.00109078	NA	mm10_cpg_inter
chr2	28917575	28917575	1	*	12.82	0	12.82	Lead	4.19405	2.74e-05	0.0441684	Barhl1	mm10_genes_promoters
chr2	28917575	28917575	1	*	12.82	0	12.82	Lead	4.19405	2.74e-05	0.0441684	Barhl1	mm10_genes_1to5kb
chr2	28917575	28917575	1	*	12.82	0	12.82	Lead	4.19405	2.74e-05	0.0441684	NA	mm10_cpg_shores
chr10	71303126	71303126	1	*	93.76	80.89	12.87	Lead	5.29658	1.18e-07	0.00121437	NA	mm10_cpg_inter
chr8	3517614	3517614	1	*	42.26	29.37	12.89	Lead	4.30107	1.7e-05	0.0328594	Pnpla6	mm10_genes_exons
chr8	3517614	3517614	1	*	42.26	29.37	12.89	Lead	4.30107	1.7e-05	0.0328594	NA	mm10_cpg_shores
chr7	30586836	30586836	1	*	98.88	85.78	13.09	Lead	5.37295	7.75e-08	0.000898446	Mir3569	mm10_genes_1to5kb
chr7	30586836	30586836	1	*	98.88	85.78	13.09	Lead	5.37295	7.75e-08	0.000898446	Kmt2b	mm10_genes_1to5kb
chr7	30586836	30586836	1	*	98.88	85.78	13.09	Lead	5.37295	7.75e-08	0.000898446	Kmt2b	mm10_genes_exons
chr7	30586836	30586836	1	*	98.88	85.78	13.09	Lead	5.37295	7.75e-08	0.000898446	NA	mm10_cpg_islands
chr5	65149293	65149293	1	*	93.68	80.58	13.1	Lead	4.28821	1.8e-05	0.0339147	Klhl5	mm10_genes_introns
chr5	65149293	65149293	1	*	93.68	80.58	13.1	Lead	4.28821	1.8e-05	0.0339147	NA	mm10_cpg_inter
chr8	70505861	70505861	1	*	37.53	24.32	13.22	Lead	4.37396	1.22e-05	0.0264561	Rex1bd	mm10_genes_exons
chr8	70505861	70505861	1	*	37.53	24.32	13.22	Lead	4.37396	1.22e-05	0.0264561	NA	mm10_cpg_islands
chrX	169134894	169134894	1	*	100	86.67	13.33	Lead	4.91458	8.9e-07	0.00485178	Arhgap6	mm10_genes_introns
chrX	169134894	169134894	1	*	100	86.67	13.33	Lead	4.91458	8.9e-07	0.00485178	NA	mm10_cpg_inter
chr9	65631271	65631271	1	*	26.88	13.5	13.38	Lead	4.48331	7.35e-06	0.0194577	Rbpms2	mm10_genes_exons
chr9	65631271	65631271	1	*	26.88	13.5	13.38	Lead	4.48331	7.35e-06	0.0194577	Rbpms2	mm10_genes_introns
chr9	65631271	65631271	1	*	26.88	13.5	13.38	Lead	4.48331	7.35e-06	0.0194577	NA	mm10_cpg_shores
chr15	10460822	10460822	1	*	84.89	71.49	13.39	Lead	4.74283	2.11e-06	0.00895384	Dnajc21	mm10_genes_introns
chr15	10460822	10460822	1	*	84.89	71.49	13.39	Lead	4.74283	2.11e-06	0.00895384	NA	mm10_cpg_inter
chr2	74700898	74700898	1	*	29.8	16.38	13.41	Lead	5.36923	7.91e-08	0.000902857	Hoxd8	mm10_genes_1to5kb
chr2	74700898	74700898	1	*	29.8	16.38	13.41	Lead	5.36923	7.91e-08	0.000902857	NA	mm10_genes_1to5kb
chr2	74700898	74700898	1	*	29.8	16.38	13.41	Lead	5.36923	7.91e-08	0.000902857	NA	mm10_cpg_shelves
chr15	103170320	103170320	1	*	49.83	36.39	13.44	Lead	4.36424	1.28e-05	0.0270978	Smug1	mm10_genes_1to5kb
chr15	103170320	103170320	1	*	49.83	36.39	13.44	Lead	4.36424	1.28e-05	0.0270978	NA	mm10_genes_1to5kb
chr15	103170320	103170320	1	*	49.83	36.39	13.44	Lead	4.36424	1.28e-05	0.0270978	NA	mm10_cpg_islands
chr7	31143816	31143816	1	*	100	86.5	13.5	Lead	4.1967	2.71e-05	0.0438825	Gramd1a	mm10_genes_promoters
chr7	31143816	31143816	1	*	100	86.5	13.5	Lead	4.1967	2.71e-05	0.0438825	Gramd1a	mm10_genes_1to5kb
chr7	31143816	31143816	1	*	100	86.5	13.5	Lead	4.1967	2.71e-05	0.0438825	Gramd1a	mm10_genes_5UTRs
chr7	31143816	31143816	1	*	100	86.5	13.5	Lead	4.1967	2.71e-05	0.0438825	Gramd1a	mm10_genes_exons
chr7	31143816	31143816	1	*	100	86.5	13.5	Lead	4.1967	2.71e-05	0.0438825	NA	mm10_cpg_inter
chr3	87536222	87536222	1	*	95.8	81.94	13.86	Lead	4.6754	2.93e-06	0.0110507	Etv3	mm10_genes_exons
chr3	87536222	87536222	1	*	95.8	81.94	13.86	Lead	4.6754	2.93e-06	0.0110507	NA	mm10_cpg_inter
chr7	45451848	45451848	1	*	96.43	82.39	14.03	Lead	4.92305	8.52e-07	0.00471694	Gys1	mm10_genes_exons
chr7	45451848	45451848	1	*	96.43	82.39	14.03	Lead	4.92305	8.52e-07	0.00471694	NA	mm10_cpg_inter
chr7	116803992	116803992	1	*	91.48	77.19	14.29	Lead	5.25248	1.5e-07	0.00142413	NA	mm10_genes_exons
chr7	116803992	116803992	1	*	91.48	77.19	14.29	Lead	5.25248	1.5e-07	0.00142413	NA	mm10_cpg_inter
chr6	68970505	68970505	1	*	90.85	76.54	14.31	Lead	4.56652	4.96e-06	0.0149118	NA	mm10_cpg_inter
chr5	102222988	102222988	1	*	97.18	82.72	14.45	Lead	4.31106	1.62e-05	0.0319155	NA	mm10_cpg_inter
chrX	101697129	101697129	1	*	98.67	84.14	14.53	Lead	5.05968	4.2e-07	0.00286807	NA	mm10_cpg_islands
chr19	44414808	44414808	1	*	69.41	54.51	14.89	Lead	4.20189	2.65e-05	0.0431746	NA	mm10_genes_1to5kb
chr19	44414808	44414808	1	*	69.41	54.51	14.89	Lead	4.20189	2.65e-05	0.0431746	NA	mm10_cpg_inter
chr11	61671755	61671755	1	*	57.39	42.39	15	Lead	4.88933	1.01e-06	0.00535751	Grap	mm10_genes_exons
chr11	61671755	61671755	1	*	57.39	42.39	15	Lead	4.88933	1.01e-06	0.00535751	NA	mm10_cpg_inter
chr1	172392395	172392395	1	*	30.94	15.79	15.15	Lead	6.71665	1.86e-11	2.26e-06	NA	mm10_genes_1to5kb
chr1	172392395	172392395	1	*	30.94	15.79	15.15	Lead	6.71665	1.86e-11	2.26e-06	NA	mm10_cpg_inter
chr15	19095777	19095777	1	*	65.29	50	15.29	Lead	4.52801	5.95e-06	0.0168637	NA	mm10_cpg_inter
chr4	112955996	112955996	1	*	73.49	58.03	15.46	Lead	4.17848	2.93e-05	0.0454324	NA	mm10_genes_exons
chr4	112955996	112955996	1	*	73.49	58.03	15.46	Lead	4.17848	2.93e-05	0.0454324	Skint6	mm10_genes_introns
chr4	112955996	112955996	1	*	73.49	58.03	15.46	Lead	4.17848	2.93e-05	0.0454324	NA	mm10_cpg_inter
chr7	45632380	45632380	1	*	47.21	31.25	15.96	Lead	4.90005	9.58e-07	0.00514792	Rasip1	mm10_genes_exons
chr7	45632380	45632380	1	*	47.21	31.25	15.96	Lead	4.90005	9.58e-07	0.00514792	NA	mm10_genes_introns
chr7	45632380	45632380	1	*	47.21	31.25	15.96	Lead	4.90005	9.58e-07	0.00514792	NA	mm10_cpg_islands
chr4	150258695	150258695	1	*	51.82	34.7	17.12	Lead	5.82731	5.63e-09	0.000121059	NA	mm10_cpg_inter
chr16	36530044	36530044	1	*	96.72	79.58	17.14	Lead	4.58873	4.46e-06	0.0140903	Casr	mm10_genes_introns
chr16	36530044	36530044	1	*	96.72	79.58	17.14	Lead	4.58873	4.46e-06	0.0140903	NA	mm10_cpg_inter
chr11	112589096	112589096	1	*	98.12	80.91	17.22	Lead	4.62539	3.74e-06	0.0125904	NA	mm10_cpg_inter
chr5	134666027	134666027	1	*	97.97	80.5	17.46	Lead	4.63709	3.53e-06	0.0122374	Limk1	mm10_genes_1to5kb
chr5	134666027	134666027	1	*	97.97	80.5	17.46	Lead	4.63709	3.53e-06	0.0122374	Limk1	mm10_genes_exons
chr5	134666027	134666027	1	*	97.97	80.5	17.46	Lead	4.63709	3.53e-06	0.0122374	Limk1	mm10_genes_introns
chr5	134666027	134666027	1	*	97.97	80.5	17.46	Lead	4.63709	3.53e-06	0.0122374	NA	mm10_cpg_inter
chr18	9495667	9495667	1	*	88.14	70.32	17.81	Lead	4.67155	2.99e-06	0.011202	NA	mm10_genes_exons
chr18	9495667	9495667	1	*	88.14	70.32	17.81	Lead	4.67155	2.99e-06	0.011202	NA	mm10_cpg_inter
chr17	29842362	29842362	1	*	20.14	2.02	18.12	Lead	5.055	4.3e-07	0.00288526	Mdga1	mm10_genes_1to5kb
chr17	29842362	29842362	1	*	20.14	2.02	18.12	Lead	5.055	4.3e-07	0.00288526	Mdga1	mm10_genes_exons
chr17	29842362	29842362	1	*	20.14	2.02	18.12	Lead	5.055	4.3e-07	0.00288526	NA	mm10_cpg_islands
chrX	115674695	115674695	1	*	85.29	66.95	18.35	Lead	4.62235	3.79e-06	0.0126596	NA	mm10_cpg_inter
chr19	53052263	53052263	1	*	52.94	34.2	18.74	Lead	5.06249	4.14e-07	0.00285268	1700054A03Rik	mm10_genes_introns
chr19	53052263	53052263	1	*	52.94	34.2	18.74	Lead	5.06249	4.14e-07	0.00285268	NA	mm10_cpg_inter
chr2	152114696	152114696	1	*	18.99	0	18.99	Lead	4.68334	2.82e-06	0.0106973	NA	mm10_cpg_inter
chrX	105152225	105152225	1	*	36.08	17.05	19.03	Lead	4.38406	1.16e-05	0.025831	NA	mm10_cpg_islands
chr11	28399406	28399406	1	*	93.02	73.84	19.19	Lead	4.26761	1.98e-05	0.0357362	Ccdc85a	mm10_genes_exons
chr11	28399406	28399406	1	*	93.02	73.84	19.19	Lead	4.26761	1.98e-05	0.0357362	Ccdc85a	mm10_genes_introns
chr11	28399406	28399406	1	*	93.02	73.84	19.19	Lead	4.26761	1.98e-05	0.0357362	NA	mm10_cpg_inter
chr8	95328931	95328931	1	*	94.83	75.41	19.42	Lead	4.43171	9.35e-06	0.0228477	Usb1	mm10_genes_1to5kb
chr8	95328931	95328931	1	*	94.83	75.41	19.42	Lead	4.43171	9.35e-06	0.0228477	Zfp319	mm10_genes_exons
chr8	95328931	95328931	1	*	94.83	75.41	19.42	Lead	4.43171	9.35e-06	0.0228477	NA	mm10_cpg_islands
chr3	123057376	123057376	1	*	93.99	74.47	19.52	Lead	4.4528	8.48e-06	0.0212835	NA	mm10_cpg_inter
chr3	103076119	103076119	1	*	90.77	71.07	19.7	Lead	5.66988	1.43e-08	0.000242838	Ampd1	mm10_genes_introns
chr3	103076119	103076119	1	*	90.77	71.07	19.7	Lead	5.66988	1.43e-08	0.000242838	NA	mm10_cpg_inter
chr7	4748929	4748929	1	*	100	80.19	19.81	Lead	5.64107	1.69e-08	0.000274431	NA	mm10_cpg_inter
chr19	9252205	9252205	1	*	91.33	71.13	20.21	Lead	4.62428	3.76e-06	0.0126004	NA	mm10_genes_introns
chr19	9252205	9252205	1	*	91.33	71.13	20.21	Lead	4.62428	3.76e-06	0.0126004	NA	mm10_cpg_inter
chrY	43042020	43042020	1	*	93.36	72.83	20.53	Lead	5.17787	2.24e-07	0.00190698	NA	mm10_cpg_inter
chr4	131920414	131920414	1	*	20.75	0	20.75	Lead	4.58682	4.5e-06	0.0140903	NA	mm10_genes_promoters
chr4	131920414	131920414	1	*	20.75	0	20.75	Lead	4.58682	4.5e-06	0.0140903	Gm12992	mm10_genes_promoters
chr4	131920414	131920414	1	*	20.75	0	20.75	Lead	4.58682	4.5e-06	0.0140903	Tmem200b	mm10_genes_1to5kb
chr4	131920414	131920414	1	*	20.75	0	20.75	Lead	4.58682	4.5e-06	0.0140903	Gm12992	mm10_genes_1to5kb
chr4	131920414	131920414	1	*	20.75	0	20.75	Lead	4.58682	4.5e-06	0.0140903	NA	mm10_cpg_islands
chr19	60889267	60889267	1	*	24	2.86	21.14	Lead	4.30369	1.68e-05	0.0326453	Grk5	mm10_genes_promoters
chr19	60889267	60889267	1	*	24	2.86	21.14	Lead	4.30369	1.68e-05	0.0326453	Grk5	mm10_genes_1to5kb
chr19	60889267	60889267	1	*	24	2.86	21.14	Lead	4.30369	1.68e-05	0.0326453	NA	mm10_cpg_shores
chr8	115366738	115366738	1	*	61.79	40.37	21.42	Lead	4.18672	2.83e-05	0.0447641	NA	mm10_cpg_inter
chr15	103184109	103184109	1	*	25.15	3.7	21.45	Lead	4.68954	2.74e-06	0.0104759	NA	mm10_cpg_shores
chr12	46399514	46399514	1	*	21.62	0	21.62	Lead	4.17581	2.97e-05	0.0457873	NA	mm10_cpg_inter
chr16	95631971	95631971	1	*	82.45	60.78	21.66	Lead	4.73487	2.19e-06	0.00900354	NA	mm10_cpg_inter
chr14	105422498	105422498	1	*	96.55	74.68	21.87	Lead	4.29105	1.78e-05	0.0336652	NA	mm10_cpg_inter
chr8	65242218	65242218	1	*	96.04	73.64	22.4	Lead	5.19695	2.03e-07	0.0018053	NA	mm10_cpg_inter
chr8	27121255	27121255	1	*	96.97	74.16	22.81	Lead	4.14237	3.44e-05	0.0498413	Adgra2	mm10_genes_exons
chr8	27121255	27121255	1	*	96.97	74.16	22.81	Lead	4.14237	3.44e-05	0.0498413	Adgra2	mm10_genes_introns
chr8	27121255	27121255	1	*	96.97	74.16	22.81	Lead	4.14237	3.44e-05	0.0498413	Adgra2	mm10_genes_3UTRs
chr8	27121255	27121255	1	*	96.97	74.16	22.81	Lead	4.14237	3.44e-05	0.0498413	NA	mm10_cpg_shores
chr2	50800652	50800652	1	*	96.15	72.97	23.18	Lead	6.42641	1.31e-10	6.82e-06	NA	mm10_cpg_inter
chr7	44600725	44600725	1	*	95.83	72.22	23.61	Lead	5.12038	3.05e-07	0.002297	NA	mm10_genes_1to5kb
chr7	44600725	44600725	1	*	95.83	72.22	23.61	Lead	5.12038	3.05e-07	0.002297	Kcnc3	mm10_genes_exons
chr7	44600725	44600725	1	*	95.83	72.22	23.61	Lead	5.12038	3.05e-07	0.002297	Kcnc3	mm10_genes_introns
chr7	44600725	44600725	1	*	95.83	72.22	23.61	Lead	5.12038	3.05e-07	0.002297	Kcnc3	mm10_genes_3UTRs
chr7	44600725	44600725	1	*	95.83	72.22	23.61	Lead	5.12038	3.05e-07	0.002297	NA	mm10_cpg_inter
chr10	56440399	56440399	1	*	46.86	23.11	23.75	Lead	4.34281	1.41e-05	0.0291782	NA	mm10_genes_1to5kb
chr10	56440399	56440399	1	*	46.86	23.11	23.75	Lead	4.34281	1.41e-05	0.0291782	Gm36595	mm10_genes_introns
chr10	56440399	56440399	1	*	46.86	23.11	23.75	Lead	4.34281	1.41e-05	0.0291782	NA	mm10_cpg_inter
chr11	103356024	103356024	1	*	44.57	20.61	23.96	Lead	4.25816	2.06e-05	0.0369164	NA	mm10_genes_introns
chr11	103356024	103356024	1	*	44.57	20.61	23.96	Lead	4.25816	2.06e-05	0.0369164	Arhgap27	mm10_genes_introns
chr11	103356024	103356024	1	*	44.57	20.61	23.96	Lead	4.25816	2.06e-05	0.0369164	NA	mm10_cpg_inter
chr2	129574280	129574280	1	*	78.23	54.03	24.2	Lead	4.23749	2.26e-05	0.0389945	NA	mm10_cpg_inter
chr7	62646445	62646445	1	*	100	75.65	24.35	Lead	4.52871	5.93e-06	0.0168637	NA	mm10_cpg_inter
chr14	52556844	52556844	1	*	75.35	50.72	24.63	Lead	4.18264	2.88e-05	0.0450213	NA	mm10_cpg_inter
chr11	100722144	100722144	1	*	25	0	25	Lead	4.5982	4.26e-06	0.0136579	Rab5c	mm10_genes_introns
chr11	100722144	100722144	1	*	25	0	25	Lead	4.5982	4.26e-06	0.0136579	NA	mm10_cpg_inter
chr16	44496428	44496428	1	*	98.21	73.12	25.1	Lead	4.8122	1.49e-06	0.00699245	Boc	mm10_genes_exons
chr16	44496428	44496428	1	*	98.21	73.12	25.1	Lead	4.8122	1.49e-06	0.00699245	NA	mm10_cpg_inter
chr16	35660302	35660302	1	*	25.45	0	25.45	Lead	5.07026	3.97e-07	0.00276472	Sema5b	mm10_genes_1to5kb
chr16	35660302	35660302	1	*	25.45	0	25.45	Lead	5.07026	3.97e-07	0.00276472	Sema5b	mm10_genes_exons
chr16	35660302	35660302	1	*	25.45	0	25.45	Lead	5.07026	3.97e-07	0.00276472	NA	mm10_cpg_islands
chr17	24544751	24544751	1	*	26	0	26	Lead	4.88453	1.04e-06	0.00540487	NA	mm10_genes_exons
chr17	24544751	24544751	1	*	26	0	26	Lead	4.88453	1.04e-06	0.00540487	NA	mm10_genes_introns
chr17	24544751	24544751	1	*	26	0	26	Lead	4.88453	1.04e-06	0.00540487	NA	mm10_cpg_inter
chr8	72220079	72220079	1	*	30	3.51	26.49	Lead	6.17383	6.67e-10	2.38e-05	Fam32a	mm10_genes_exons
chr8	72220079	72220079	1	*	30	3.51	26.49	Lead	6.17383	6.67e-10	2.38e-05	NA	mm10_cpg_shores
chr15	86235564	86235564	1	*	86.44	59.92	26.53	Lead	4.28755	1.81e-05	0.0339147	Tbc1d22a	mm10_genes_exons
chr15	86235564	86235564	1	*	86.44	59.92	26.53	Lead	4.28755	1.81e-05	0.0339147	NA	mm10_cpg_inter
chr11	115807460	115807460	1	*	77.42	50.88	26.54	Lead	4.14333	3.42e-05	0.0498413	Caskin2	mm10_genes_introns
chr11	115807460	115807460	1	*	77.42	50.88	26.54	Lead	4.14333	3.42e-05	0.0498413	NA	mm10_cpg_shelves
chr18	61026002	61026002	1	*	92.23	65.62	26.61	Lead	4.69435	2.67e-06	0.0103749	Cdx1	mm10_genes_introns
chr18	61026002	61026002	1	*	92.23	65.62	26.61	Lead	4.69435	2.67e-06	0.0103749	NA	mm10_cpg_inter
chr14	81560942	81560942	1	*	70.51	43.84	26.67	Lead	4.92751	8.33e-07	0.0046536	NA	mm10_cpg_inter
chr10	69252289	69252289	1	*	68.29	41.46	26.83	Lead	4.22793	2.36e-05	0.0399415	Rhobtb1	mm10_genes_introns
chr10	69252289	69252289	1	*	68.29	41.46	26.83	Lead	4.22793	2.36e-05	0.0399415	NA	mm10_cpg_inter
chr5	124912370	124912370	1	*	48.6	21.25	27.35	Lead	4.64827	3.35e-06	0.011874	NA	mm10_cpg_inter
chr8	122336116	122336116	1	*	98.18	70.77	27.41	Lead	4.66745	3.05e-06	0.0112416	NA	mm10_genes_1to5kb
chr8	122336116	122336116	1	*	98.18	70.77	27.41	Lead	4.66745	3.05e-06	0.0112416	Zfpm1	mm10_genes_exons
chr8	122336116	122336116	1	*	98.18	70.77	27.41	Lead	4.66745	3.05e-06	0.0112416	Galnt2	mm10_genes_introns
chr8	122336116	122336116	1	*	98.18	70.77	27.41	Lead	4.66745	3.05e-06	0.0112416	NA	mm10_cpg_islands
chrX	148614401	148614401	1	*	87.44	59.75	27.69	Lead	5.10358	3.33e-07	0.00243547	NA	mm10_genes_exons
chrX	148614401	148614401	1	*	87.44	59.75	27.69	Lead	5.10358	3.33e-07	0.00243547	NA	mm10_cpg_inter
chr19	13120746	13120746	1	*	94.39	66.29	28.1	Lead	5.75139	8.85e-09	0.000170209	NA	mm10_cpg_inter
chr4	66743261	66743261	1	*	100	71.83	28.17	Lead	4.22559	2.38e-05	0.0399415	NA	mm10_cpg_inter
chr2	61337660	61337660	1	*	100	70.97	29.03	Lead	4.89328	9.92e-07	0.00528956	NA	mm10_cpg_inter
chr19	40147116	40147116	1	*	94.12	64.6	29.52	Lead	4.36886	1.25e-05	0.0267646	NA	mm10_cpg_inter
chrX	75673666	75673666	1	*	89.67	59.03	30.64	Lead	4.54976	5.37e-06	0.015698	NA	mm10_cpg_inter
chr11	120655863	120655863	1	*	95.71	63.82	31.9	Lead	5.02063	5.15e-07	0.00327256	NA	mm10_genes_1to5kb
chr11	120655863	120655863	1	*	95.71	63.82	31.9	Lead	5.02063	5.15e-07	0.00327256	Notum	mm10_genes_exons
chr11	120655863	120655863	1	*	95.71	63.82	31.9	Lead	5.02063	5.15e-07	0.00327256	NA	mm10_genes_introns
chr11	120655863	120655863	1	*	95.71	63.82	31.9	Lead	5.02063	5.15e-07	0.00327256	NA	mm10_cpg_shelves
chrX	20694384	20694384	1	*	93.1	60.32	32.79	Lead	4.60697	4.09e-06	0.0133284	Cdk16	mm10_genes_1to5kb
chrX	20694384	20694384	1	*	93.1	60.32	32.79	Lead	4.60697	4.09e-06	0.0133284	Cdk16	mm10_genes_exons
chrX	20694384	20694384	1	*	93.1	60.32	32.79	Lead	4.60697	4.09e-06	0.0133284	NA	mm10_cpg_inter
chr1	90927478	90927478	1	*	44.44	11.43	33.02	Lead	4.34272	1.41e-05	0.0291782	Mlph	mm10_genes_promoters
chr1	90927478	90927478	1	*	44.44	11.43	33.02	Lead	4.34272	1.41e-05	0.0291782	Mlph	mm10_genes_introns
chr1	90927478	90927478	1	*	44.44	11.43	33.02	Lead	4.34272	1.41e-05	0.0291782	NA	mm10_cpg_inter
chr10	126532592	126532592	1	*	80.68	47.62	33.06	Lead	4.65395	3.26e-06	0.0116369	NA	mm10_cpg_inter
chr8	70279385	70279385	1	*	96.61	63.27	33.34	Lead	4.73657	2.17e-06	0.00900354	Homer3	mm10_genes_1to5kb
chr8	70279385	70279385	1	*	96.61	63.27	33.34	Lead	4.73657	2.17e-06	0.00900354	Sugp2	mm10_genes_introns
chr8	70279385	70279385	1	*	96.61	63.27	33.34	Lead	4.73657	2.17e-06	0.00900354	NA	mm10_genes_introns
chr8	70279385	70279385	1	*	96.61	63.27	33.34	Lead	4.73657	2.17e-06	0.00900354	NA	mm10_cpg_shelves
chrX	38485572	38485572	1	*	54.97	21.4	33.57	Lead	6.62328	3.51e-11	3.21e-06	NA	mm10_cpg_inter
chr2	165845585	165845585	1	*	34.55	0	34.55	Lead	5.26717	1.39e-07	0.00134983	Zmynd8	mm10_genes_introns
chr2	165845585	165845585	1	*	34.55	0	34.55	Lead	5.26717	1.39e-07	0.00134983	NA	mm10_cpg_islands
chr3	67892934	67892934	1	*	87.39	52.04	35.35	Lead	4.56899	4.9e-06	0.0148597	Iqcj	mm10_genes_introns
chr3	67892934	67892934	1	*	87.39	52.04	35.35	Lead	4.56899	4.9e-06	0.0148597	Iqschfp	mm10_genes_introns
chr3	67892934	67892934	1	*	87.39	52.04	35.35	Lead	4.56899	4.9e-06	0.0148597	NA	mm10_cpg_inter
chr12	108035809	108035809	1	*	88.1	52.56	35.53	Lead	5.31348	1.08e-07	0.00113901	NA	mm10_cpg_inter
chr12	92885876	92885876	1	*	98.31	62.71	35.59	Lead	6.17006	6.83e-10	2.38e-05	NA	mm10_cpg_inter
chr19	42743388	42743388	1	*	56.86	20.93	35.93	Lead	5.77067	7.9e-09	0.000160269	NA	mm10_genes_1to5kb
chr19	42743388	42743388	1	*	56.86	20.93	35.93	Lead	5.77067	7.9e-09	0.000160269	Pyroxd2	mm10_genes_introns
chr19	42743388	42743388	1	*	56.86	20.93	35.93	Lead	5.77067	7.9e-09	0.000160269	NA	mm10_cpg_inter
chr4	138827567	138827567	1	*	39.77	3.37	36.4	Lead	6.09052	1.13e-09	3.58e-05	NA	mm10_genes_promoters
chr4	138827567	138827567	1	*	39.77	3.37	36.4	Lead	6.09052	1.13e-09	3.58e-05	Pla2g2a	mm10_genes_1to5kb
chr4	138827567	138827567	1	*	39.77	3.37	36.4	Lead	6.09052	1.13e-09	3.58e-05	Pla2g5	mm10_genes_introns
chr4	138827567	138827567	1	*	39.77	3.37	36.4	Lead	6.09052	1.13e-09	3.58e-05	NA	mm10_cpg_inter
chr6	61298740	61298740	1	*	89.66	53.06	36.59	Lead	4.28806	1.8e-05	0.0339147	Ccser1	mm10_genes_introns
chr6	61298740	61298740	1	*	89.66	53.06	36.59	Lead	4.28806	1.8e-05	0.0339147	NA	mm10_cpg_inter
chr15	101766355	101766355	1	*	77.55	39.13	38.42	Lead	5.55565	2.77e-08	0.000396297	Krt74	mm10_genes_1to5kb
chr15	101766355	101766355	1	*	77.55	39.13	38.42	Lead	5.55565	2.77e-08	0.000396297	NA	mm10_cpg_inter
chr11	55531016	55531016	1	*	77.78	38.46	39.32	Lead	4.73786	2.16e-06	0.00900354	Glra1	mm10_genes_introns
chr11	55531016	55531016	1	*	77.78	38.46	39.32	Lead	4.73786	2.16e-06	0.00900354	NA	mm10_cpg_inter
chr2	24473701	24473701	1	*	76.19	32.73	43.46	Lead	4.54225	5.57e-06	0.0160751	Pax8	mm10_genes_exons
chr2	24473701	24473701	1	*	76.19	32.73	43.46	Lead	4.54225	5.57e-06	0.0160751	NA	mm10_genes_introns
chr2	24473701	24473701	1	*	76.19	32.73	43.46	Lead	4.54225	5.57e-06	0.0160751	Pax8	mm10_genes_introns
chr2	24473701	24473701	1	*	76.19	32.73	43.46	Lead	4.54225	5.57e-06	0.0160751	NA	mm10_cpg_shores
chr10	66199610	66199610	1	*	75.58	30.77	44.81	Lead	5.75526	8.65e-09	0.000170209	1700023F02Rik	mm10_genes_introns
chr10	66199610	66199610	1	*	75.58	30.77	44.81	Lead	5.75526	8.65e-09	0.000170209	NA	mm10_cpg_inter
chr15	101437814	101437814	1	*	82.98	37.97	45	Lead	4.33165	1.48e-05	0.029941	Krt87	mm10_genes_introns
chr15	101437814	101437814	1	*	82.98	37.97	45	Lead	4.33165	1.48e-05	0.029941	NA	mm10_cpg_shores
chr4	111504508	111504508	1	*	100	53.19	46.81	Lead	6.0245	1.7e-09	4.6e-05	Agbl4	mm10_genes_introns
chr4	111504508	111504508	1	*	100	53.19	46.81	Lead	6.0245	1.7e-09	4.6e-05	NA	mm10_cpg_inter
chr3	95121418	95121418	1	*	72.73	25.45	47.27	Lead	4.38325	1.17e-05	0.025831	Tmod4	mm10_genes_1to5kb
chr3	95121418	95121418	1	*	72.73	25.45	47.27	Lead	4.38325	1.17e-05	0.025831	Vps72	mm10_genes_introns
chr3	95121418	95121418	1	*	72.73	25.45	47.27	Lead	4.38325	1.17e-05	0.025831	NA	mm10_cpg_inter
chr7	29231519	29231519	1	*	47.73	0	47.73	Lead	4.84287	1.28e-06	0.00630348	Kcnk6	mm10_genes_promoters
chr7	29231519	29231519	1	*	47.73	0	47.73	Lead	4.84287	1.28e-06	0.00630348	Kcnk6	mm10_genes_introns
chr7	29231519	29231519	1	*	47.73	0	47.73	Lead	4.84287	1.28e-06	0.00630348	NA	mm10_cpg_shores
chr7	14957371	14957371	1	*	100	51.67	48.33	Lead	7.18078	6.93e-13	1.69e-07	NA	mm10_cpg_inter
chr12	111669532	111669532	1	*	76.74	24.59	52.15	Lead	4.52223	6.12e-06	0.0171324	Ckb	mm10_genes_exons
chr12	111669532	111669532	1	*	76.74	24.59	52.15	Lead	4.52223	6.12e-06	0.0171324	Ckb	mm10_genes_3UTRs
chr12	111669532	111669532	1	*	76.74	24.59	52.15	Lead	4.52223	6.12e-06	0.0171324	NA	mm10_cpg_shores
chr17	87612824	87612824	1	*	73.1	18.75	54.35	Lead	4.23837	2.25e-05	0.0389862	NA	mm10_cpg_inter

## Sheet: S6
Table S6: DMRs in Pb-treated males
seqnames_M	start_M	end_M	width	strand	meth_case_M	meth_control_M	meth_diff_M	direction_M	stat_M	pvalue_M	fdr_M	annot.symbol	annot.type_M
chr1	90232001	90233000	1000	*	15.38	81.85	-66.47	control	4.34666	1.38e-05	0.0197994	NA	mm10_genes_1to5kb
chr1	90232001	90233000	1000	*	15.38	81.85	-66.47	control	4.34666	1.38e-05	0.0197994	NA	mm10_cpg_inter
chr7	45121001	45122000	1000	*	21.28	61.9	-40.63	control	4.19351	2.75e-05	0.0321585	Mir150	mm10_genes_promoters
chr7	45121001	45122000	1000	*	21.28	61.9	-40.63	control	4.19351	2.75e-05	0.0321585	NA	mm10_genes_promoters
chr7	45121001	45122000	1000	*	21.28	61.9	-40.63	control	4.19351	2.75e-05	0.0321585	Mir150	mm10_genes_exons
chr7	45121001	45122000	1000	*	21.28	61.9	-40.63	control	4.19351	2.75e-05	0.0321585	NA	mm10_genes_exons
chr7	45121001	45122000	1000	*	21.28	61.9	-40.63	control	4.19351	2.75e-05	0.0321585	NA	mm10_cpg_shores
chr7	45121001	45122000	1000	*	21.28	61.9	-40.63	control	4.19351	2.75e-05	0.0321585	NA	mm10_cpg_shelves
chr7	47537001	47538000	1000	*	24.49	62.22	-37.73	control	4.24398	2.2e-05	0.0281585	NA	mm10_cpg_inter
chr8	120754001	120755000	1000	*	64.06	100	-35.94	control	5.27215	1.35e-07	0.00113466	Irf8	mm10_genes_exons
chr8	120754001	120755000	1000	*	64.06	100	-35.94	control	5.27215	1.35e-07	0.00113466	Galnt2	mm10_genes_introns
chr8	120754001	120755000	1000	*	64.06	100	-35.94	control	5.27215	1.35e-07	0.00113466	Irf8	mm10_genes_introns
chr8	120754001	120755000	1000	*	64.06	100	-35.94	control	5.27215	1.35e-07	0.00113466	NA	mm10_cpg_inter
chrY	1717001	1718000	1000	*	61.29	95.33	-34.04	control	4.92663	8.37e-07	0.00417206	NA	mm10_cpg_inter
chr17	31734001	31735000	1000	*	12.22	42.54	-30.32	control	4.60907	4.04e-06	0.00907666	NA	mm10_cpg_inter
chr14	25514001	25515000	1000	*	55.79	86.05	-30.26	control	3.99888	6.36e-05	0.0492477	Zmiz1	mm10_genes_introns
chr14	25514001	25515000	1000	*	55.79	86.05	-30.26	control	3.99888	6.36e-05	0.0492477	NA	mm10_cpg_inter
chr12	108269001	108270000	1000	*	59.81	89.66	-29.84	control	3.99489	6.47e-05	0.0495148	Ccdc85c	mm10_genes_introns
chr12	108269001	108270000	1000	*	59.81	89.66	-29.84	control	3.99489	6.47e-05	0.0495148	NA	mm10_cpg_inter
chr9	64631001	64632000	1000	*	68.81	96.88	-28.07	control	4.61865	3.86e-06	0.00881457	Megf11	mm10_genes_introns
chr9	64631001	64632000	1000	*	68.81	96.88	-28.07	control	4.61865	3.86e-06	0.00881457	NA	mm10_cpg_inter
chr18	56704001	56705000	1000	*	45.83	73.86	-28.03	control	4.35563	1.33e-05	0.0192098	Lmnb1	mm10_genes_1to5kb
chr18	56704001	56705000	1000	*	45.83	73.86	-28.03	control	4.35563	1.33e-05	0.0192098	NA	mm10_cpg_shelves
chr4	140843001	140844000	1000	*	69.3	96.45	-27.16	control	5.89302	3.79e-09	0.000102113	Padi1	mm10_genes_introns
chr4	140843001	140844000	1000	*	69.3	96.45	-27.16	control	5.89302	3.79e-09	0.000102113	NA	mm10_cpg_inter
chr10	127337001	127338000	1000	*	72.9	100	-27.1	control	4.55098	5.34e-06	0.0110607	Gli1	mm10_genes_promoters
chr10	127337001	127338000	1000	*	72.9	100	-27.1	control	4.55098	5.34e-06	0.0110607	Gli1	mm10_genes_exons
chr10	127337001	127338000	1000	*	72.9	100	-27.1	control	4.55098	5.34e-06	0.0110607	NA	mm10_genes_introns
chr10	127337001	127338000	1000	*	72.9	100	-27.1	control	4.55098	5.34e-06	0.0110607	Gli1	mm10_genes_introns
chr10	127337001	127338000	1000	*	72.9	100	-27.1	control	4.55098	5.34e-06	0.0110607	NA	mm10_cpg_inter
chr2	52804001	52805000	1000	*	46.97	73.58	-26.62	control	4.2694	1.96e-05	0.0261287	NA	mm10_cpg_inter
chr8	19392001	19393000	1000	*	73.77	100	-26.23	control	4.78081	1.75e-06	0.0054116	NA	mm10_cpg_inter
chr5	33689001	33690000	1000	*	17.61	42.97	-25.36	control	4.62357	3.77e-06	0.0087561	NA	mm10_cpg_shelves
chr9	61516001	61517000	1000	*	77.01	100	-22.99	control	4.64741	3.36e-06	0.00806068	NA	mm10_genes_introns
chr9	61516001	61517000	1000	*	77.01	100	-22.99	control	4.64741	3.36e-06	0.00806068	NA	mm10_cpg_inter
chr12	103793001	103794000	1000	*	77.39	100	-22.61	control	5.332	9.71e-08	0.0010061	Serpina1b	mm10_genes_introns
chr12	103793001	103794000	1000	*	77.39	100	-22.61	control	5.332	9.71e-08	0.0010061	NA	mm10_genes_introns
chr12	103793001	103794000	1000	*	77.39	100	-22.61	control	5.332	9.71e-08	0.0010061	NA	mm10_cpg_inter
chr16	27133001	27134000	1000	*	73.78	96.02	-22.24	control	4.51945	6.2e-06	0.0120986	NA	mm10_cpg_inter
chr12	108509001	108510000	1000	*	60.19	81.78	-21.59	control	4.05463	5.02e-05	0.0436198	Eml1	mm10_genes_exons
chr12	108509001	108510000	1000	*	60.19	81.78	-21.59	control	4.05463	5.02e-05	0.0436198	Eml1	mm10_genes_introns
chr12	108509001	108510000	1000	*	60.19	81.78	-21.59	control	4.05463	5.02e-05	0.0436198	NA	mm10_cpg_inter
chr6	84057001	84058000	1000	*	61.31	82.18	-20.88	control	4.00484	6.21e-05	0.0487648	Dysf	mm10_genes_introns
chr6	84057001	84058000	1000	*	61.31	82.18	-20.88	control	4.00484	6.21e-05	0.0487648	NA	mm10_cpg_inter
chr10	22616001	22617000	1000	*	80	100	-20	control	4.09178	4.28e-05	0.0404163	NA	mm10_cpg_inter
chrX	12002001	12003000	1000	*	76.62	96.3	-19.67	control	4.45421	8.42e-06	0.0141886	NA	mm10_cpg_shelves
chr2	77344001	77345000	1000	*	70.37	89.44	-19.07	control	4.50259	6.71e-06	0.0126986	NA	mm10_cpg_inter
chr9	119021001	119022000	1000	*	48.86	66.75	-17.89	control	5.00993	5.44e-07	0.00318751	Ctdspl	mm10_genes_introns
chr9	119021001	119022000	1000	*	48.86	66.75	-17.89	control	5.00993	5.44e-07	0.00318751	NA	mm10_cpg_inter
chr5	114399001	114400000	1000	*	82.35	100	-17.65	control	4.45773	8.28e-06	0.0141886	Ube3b	mm10_genes_1to5kb
chr5	114399001	114400000	1000	*	82.35	100	-17.65	control	4.45773	8.28e-06	0.0141886	Mir7027	mm10_genes_1to5kb
chr5	114399001	114400000	1000	*	82.35	100	-17.65	control	4.45773	8.28e-06	0.0141886	Ube3b	mm10_genes_exons
chr5	114399001	114400000	1000	*	82.35	100	-17.65	control	4.45773	8.28e-06	0.0141886	Ube3b	mm10_genes_introns
chr5	114399001	114400000	1000	*	82.35	100	-17.65	control	4.45773	8.28e-06	0.0141886	Ube3b	mm10_genes_3UTRs
chr5	114399001	114400000	1000	*	82.35	100	-17.65	control	4.45773	8.28e-06	0.0141886	NA	mm10_cpg_inter
chr3	100915001	100916000	1000	*	72.73	90.07	-17.34	control	4.07749	4.55e-05	0.0411377	NA	mm10_cpg_inter
chr15	81700001	81701000	1000	*	0	17.17	-17.17	control	4.22722	2.37e-05	0.0292257	Chadl	mm10_genes_1to5kb
chr15	81700001	81701000	1000	*	0	17.17	-17.17	control	4.22722	2.37e-05	0.0292257	NA	mm10_genes_1to5kb
chr15	81700001	81701000	1000	*	0	17.17	-17.17	control	4.22722	2.37e-05	0.0292257	NA	mm10_cpg_inter
chr2	152911001	152912000	1000	*	17.74	33.94	-16.2	control	4.06671	4.77e-05	0.042237	Mylk2	mm10_genes_promoters
chr2	152911001	152912000	1000	*	17.74	33.94	-16.2	control	4.06671	4.77e-05	0.042237	Mylk2	mm10_genes_5UTRs
chr2	152911001	152912000	1000	*	17.74	33.94	-16.2	control	4.06671	4.77e-05	0.042237	Mylk2	mm10_genes_exons
chr2	152911001	152912000	1000	*	17.74	33.94	-16.2	control	4.06671	4.77e-05	0.042237	Mylk2	mm10_genes_introns
chr2	152911001	152912000	1000	*	17.74	33.94	-16.2	control	4.06671	4.77e-05	0.042237	NA	mm10_cpg_inter
chr10	98751001	98752000	1000	*	35.76	51.95	-16.18	control	4.71591	2.41e-06	0.00647985	NA	mm10_cpg_inter
chr11	114126001	114127000	1000	*	48.41	64.48	-16.06	control	4.02951	5.59e-05	0.0463542	NA	mm10_cpg_inter
chr2	155743001	155744000	1000	*	0	15.85	-15.85	control	4.0894	4.32e-05	0.0404163	NA	mm10_cpg_inter
chr10	30327001	30328000	1000	*	75.54	91.34	-15.8	control	4.85189	1.22e-06	0.00484275	NA	mm10_cpg_inter
chr4	151894001	151895000	1000	*	74.46	90.24	-15.78	control	4.99204	5.97e-07	0.00321779	NA	mm10_cpg_inter
chr14	16200001	16201000	1000	*	28.61	44.09	-15.48	control	5.44781	5.1e-08	0.00063005	NA	mm10_cpg_inter
chr5	142949001	142950000	1000	*	21.55	35.68	-14.13	control	4.10087	4.12e-05	0.0404019	NA	mm10_cpg_inter
chr9	42960001	42961000	1000	*	75.35	89.2	-13.85	control	4.76928	1.85e-06	0.0054116	NA	mm10_genes_1to5kb
chr9	42960001	42961000	1000	*	75.35	89.2	-13.85	control	4.76928	1.85e-06	0.0054116	NA	mm10_cpg_inter
chr3	101034001	101035000	1000	*	55.51	69.08	-13.57	control	4.87371	1.1e-06	0.0046083	Cd101	mm10_genes_1to5kb
chr3	101034001	101035000	1000	*	55.51	69.08	-13.57	control	4.87371	1.1e-06	0.0046083	NA	mm10_cpg_inter
chr4	40933001	40934000	1000	*	56.86	70.28	-13.42	control	4.36365	1.28e-05	0.0190833	NA	mm10_cpg_inter
chr2	161991001	161992000	1000	*	86.73	100	-13.27	control	4.45391	8.43e-06	0.0141886	Ptprt	mm10_genes_introns
chr2	161991001	161992000	1000	*	86.73	100	-13.27	control	4.45391	8.43e-06	0.0141886	NA	mm10_cpg_inter
chr11	90599001	90600000	1000	*	84.41	96.98	-12.57	control	4.3201	1.56e-05	0.0216737	Stxbp4	mm10_genes_exons
chr11	90599001	90600000	1000	*	84.41	96.98	-12.57	control	4.3201	1.56e-05	0.0216737	Stxbp4	mm10_genes_introns
chr11	90599001	90600000	1000	*	84.41	96.98	-12.57	control	4.3201	1.56e-05	0.0216737	Stxbp4	mm10_genes_3UTRs
chr11	90599001	90600000	1000	*	84.41	96.98	-12.57	control	4.3201	1.56e-05	0.0216737	NA	mm10_cpg_inter
chr18	43501001	43502000	1000	*	69.32	81.77	-12.45	control	4.52461	6.05e-06	0.0119809	NA	mm10_cpg_inter
chr14	33966001	33967000	1000	*	60.83	72.69	-11.86	control	4.7719	1.82e-06	0.0054116	NA	mm10_cpg_inter
chr7	63824001	63825000	1000	*	30.33	42.15	-11.82	control	4.75834	1.95e-06	0.00547534	NA	mm10_genes_1to5kb
chr7	63824001	63825000	1000	*	30.33	42.15	-11.82	control	4.75834	1.95e-06	0.00547534	NA	mm10_cpg_inter
chr5	112728001	112729000	1000	*	74.69	85.65	-10.97	control	4.50925	6.51e-06	0.0125136	Myo18b	mm10_genes_introns
chr5	112728001	112729000	1000	*	74.69	85.65	-10.97	control	4.50925	6.51e-06	0.0125136	NA	mm10_cpg_inter
chr9	114417001	114418000	1000	*	86.82	97.67	-10.84	control	5.66218	1.49e-08	0.000223598	Glb1	mm10_genes_exons
chr9	114417001	114418000	1000	*	86.82	97.67	-10.84	control	5.66218	1.49e-08	0.000223598	Glb1	mm10_genes_introns
chr9	114417001	114418000	1000	*	86.82	97.67	-10.84	control	5.66218	1.49e-08	0.000223598	NA	mm10_cpg_inter
chr14	34399001	34400000	1000	*	64.75	75.54	-10.8	control	4.23362	2.3e-05	0.0289365	Mmrn2	mm10_genes_exons
chr14	34399001	34400000	1000	*	64.75	75.54	-10.8	control	4.23362	2.3e-05	0.0289365	Mmrn2	mm10_genes_introns
chr14	34399001	34400000	1000	*	64.75	75.54	-10.8	control	4.23362	2.3e-05	0.0289365	NA	mm10_cpg_inter
chr16	23266001	23267000	1000	*	88.6	99.29	-10.69	control	5.27935	1.3e-07	0.00113466	St6gal1	mm10_genes_1to5kb
chr16	23266001	23267000	1000	*	88.6	99.29	-10.69	control	5.27935	1.3e-07	0.00113466	St6gal1	mm10_genes_introns
chr16	23266001	23267000	1000	*	88.6	99.29	-10.69	control	5.27935	1.3e-07	0.00113466	NA	mm10_cpg_inter
chr10	115212001	115213000	1000	*	89.35	99.65	-10.3	control	5.35667	8.48e-08	0.000951131	Tbc1d15	mm10_genes_1to5kb
chr10	115212001	115213000	1000	*	89.35	99.65	-10.3	control	5.35667	8.48e-08	0.000951131	Tbc1d15	mm10_genes_exons
chr10	115212001	115213000	1000	*	89.35	99.65	-10.3	control	5.35667	8.48e-08	0.000951131	Tbc1d15	mm10_genes_introns
chr10	115212001	115213000	1000	*	89.35	99.65	-10.3	control	5.35667	8.48e-08	0.000951131	NA	mm10_cpg_inter
chr5	103208001	103209000	1000	*	64.75	74.98	-10.22	control	4.1816	2.89e-05	0.0329395	Mapk10	mm10_genes_1to5kb
chr5	103208001	103209000	1000	*	64.75	74.98	-10.22	control	4.1816	2.89e-05	0.0329395	Mapk10	mm10_genes_exons
chr5	103208001	103209000	1000	*	64.75	74.98	-10.22	control	4.1816	2.89e-05	0.0329395	NA	mm10_genes_exons
chr5	103208001	103209000	1000	*	64.75	74.98	-10.22	control	4.1816	2.89e-05	0.0329395	Mapk10	mm10_genes_introns
chr5	103208001	103209000	1000	*	64.75	74.98	-10.22	control	4.1816	2.89e-05	0.0329395	NA	mm10_cpg_inter
chr5	92297001	92298000	1000	*	89.88	100	-10.12	control	4.00395	6.23e-05	0.0487648	Sdad1	mm10_genes_promoters
chr5	92297001	92298000	1000	*	89.88	100	-10.12	control	4.00395	6.23e-05	0.0487648	NA	mm10_genes_1to5kb
chr5	92297001	92298000	1000	*	89.88	100	-10.12	control	4.00395	6.23e-05	0.0487648	Sdad1	mm10_genes_1to5kb
chr5	92297001	92298000	1000	*	89.88	100	-10.12	control	4.00395	6.23e-05	0.0487648	Sdad1	mm10_genes_exons
chr5	92297001	92298000	1000	*	89.88	100	-10.12	control	4.00395	6.23e-05	0.0487648	NA	mm10_genes_introns
chr5	92297001	92298000	1000	*	89.88	100	-10.12	control	4.00395	6.23e-05	0.0487648	Sdad1	mm10_genes_introns
chr5	92297001	92298000	1000	*	89.88	100	-10.12	control	4.00395	6.23e-05	0.0487648	NA	mm10_cpg_inter
chr7	16731001	16732000	1000	*	85.09	95.2	-10.1	control	4.42389	9.69e-06	0.0155386	NA	mm10_cpg_inter
chr15	30693001	30694000	1000	*	83.07	93.12	-10.04	control	4.05997	4.91e-05	0.0431915	Ctnnd2	mm10_genes_introns
chr15	30693001	30694000	1000	*	83.07	93.12	-10.04	control	4.05997	4.91e-05	0.0431915	NA	mm10_cpg_inter
chr7	142371001	142372000	1000	*	13.29	3.2	10.09	Lead	4.34219	1.41e-05	0.0199939	Ifitm10	mm10_genes_5UTRs
chr7	142371001	142372000	1000	*	13.29	3.2	10.09	Lead	4.34219	1.41e-05	0.0199939	Ifitm10	mm10_genes_exons
chr7	142371001	142372000	1000	*	13.29	3.2	10.09	Lead	4.34219	1.41e-05	0.0199939	Ctsd	mm10_genes_exons
chr7	142371001	142372000	1000	*	13.29	3.2	10.09	Lead	4.34219	1.41e-05	0.0199939	Ifitm10	mm10_genes_introns
chr7	142371001	142372000	1000	*	13.29	3.2	10.09	Lead	4.34219	1.41e-05	0.0199939	Ctsd	mm10_genes_introns
chr7	142371001	142372000	1000	*	13.29	3.2	10.09	Lead	4.34219	1.41e-05	0.0199939	NA	mm10_cpg_shores
chr3	129558001	129559000	1000	*	95.86	85.71	10.15	Lead	4.10207	4.09e-05	0.0404019	Elovl6	mm10_genes_introns
chr3	129558001	129559000	1000	*	95.86	85.71	10.15	Lead	4.10207	4.09e-05	0.0404019	NA	mm10_cpg_inter
chr8	70758001	70759000	1000	*	53.71	43.49	10.22	Lead	4.36184	1.29e-05	0.0190833	Rab3a	mm10_genes_exons
chr8	70758001	70759000	1000	*	53.71	43.49	10.22	Lead	4.36184	1.29e-05	0.0190833	Mpv17l2	mm10_genes_exons
chr8	70758001	70759000	1000	*	53.71	43.49	10.22	Lead	4.36184	1.29e-05	0.0190833	Rab3a	mm10_genes_3UTRs
chr8	70758001	70759000	1000	*	53.71	43.49	10.22	Lead	4.36184	1.29e-05	0.0190833	Mpv17l2	mm10_genes_3UTRs
chr8	70758001	70759000	1000	*	53.71	43.49	10.22	Lead	4.36184	1.29e-05	0.0190833	NA	mm10_cpg_shores
chr8	70758001	70759000	1000	*	53.71	43.49	10.22	Lead	4.36184	1.29e-05	0.0190833	NA	mm10_cpg_shelves
chr4	141529001	141530000	1000	*	95.66	85.16	10.51	Lead	3.99522	6.46e-05	0.0495148	Spen	mm10_genes_introns
chr4	141529001	141530000	1000	*	95.66	85.16	10.51	Lead	3.99522	6.46e-05	0.0495148	NA	mm10_cpg_inter
chrX	42357001	42358000	1000	*	95.65	85.08	10.57	Lead	4.38017	1.19e-05	0.0181439	NA	mm10_cpg_inter
chr11	120169001	120170000	1000	*	51.74	40.23	11.51	Lead	4.14007	3.47e-05	0.0377007	NA	mm10_cpg_inter
chr18	25115001	25116000	1000	*	97.52	85.71	11.8	Lead	4.04727	5.18e-05	0.044486	Fhod3	mm10_genes_exons
chr18	25115001	25116000	1000	*	97.52	85.71	11.8	Lead	4.04727	5.18e-05	0.044486	Fhod3	mm10_genes_introns
chr18	25115001	25116000	1000	*	97.52	85.71	11.8	Lead	4.04727	5.18e-05	0.044486	NA	mm10_cpg_inter
chr2	70096001	70097000	1000	*	42.97	30.29	12.68	Lead	4.81283	1.49e-06	0.00509736	Myo3b	mm10_genes_promoters
chr2	70096001	70097000	1000	*	42.97	30.29	12.68	Lead	4.81283	1.49e-06	0.00509736	Myo3b	mm10_genes_5UTRs
chr2	70096001	70097000	1000	*	42.97	30.29	12.68	Lead	4.81283	1.49e-06	0.00509736	Myo3b	mm10_genes_exons
chr2	70096001	70097000	1000	*	42.97	30.29	12.68	Lead	4.81283	1.49e-06	0.00509736	Myo3b	mm10_genes_introns
chr2	70096001	70097000	1000	*	42.97	30.29	12.68	Lead	4.81283	1.49e-06	0.00509736	NA	mm10_cpg_inter
chr5	35425001	35426000	1000	*	47.06	34.07	12.99	Lead	5.24906	1.53e-07	0.00114358	NA	mm10_cpg_inter
chr14	63828001	63829000	1000	*	77.32	64.33	13	Lead	4.23145	2.32e-05	0.0289468	NA	mm10_cpg_inter
chr3	96612001	96613000	1000	*	99.06	86.01	13.04	Lead	4.01947	5.83e-05	0.0475986	NA	mm10_genes_1to5kb
chr3	96612001	96613000	1000	*	99.06	86.01	13.04	Lead	4.01947	5.83e-05	0.0475986	Lix1l	mm10_genes_introns
chr3	96612001	96613000	1000	*	99.06	86.01	13.04	Lead	4.01947	5.83e-05	0.0475986	6330549D23Rik	mm10_genes_introns
chr3	96612001	96613000	1000	*	99.06	86.01	13.04	Lead	4.01947	5.83e-05	0.0475986	NA	mm10_cpg_inter
chr3	95982001	95983000	1000	*	85.01	71.71	13.3	Lead	4.48215	7.39e-06	0.0130917	NA	mm10_cpg_inter
chr14	54162001	54163000	1000	*	97.41	83.87	13.54	Lead	4.68896	2.75e-06	0.00711019	NA	mm10_genes_promoters
chr14	54162001	54163000	1000	*	97.41	83.87	13.54	Lead	4.68896	2.75e-06	0.00711019	NA	mm10_genes_1to5kb
chr14	54162001	54163000	1000	*	97.41	83.87	13.54	Lead	4.68896	2.75e-06	0.00711019	NA	mm10_genes_exons
chr14	54162001	54163000	1000	*	97.41	83.87	13.54	Lead	4.68896	2.75e-06	0.00711019	NA	mm10_cpg_inter
chr15	10460001	10461000	1000	*	84.89	71.22	13.66	Lead	4.82174	1.42e-06	0.00509736	Dnajc21	mm10_genes_exons
chr15	10460001	10461000	1000	*	84.89	71.22	13.66	Lead	4.82174	1.42e-06	0.00509736	Dnajc21	mm10_genes_introns
chr15	10460001	10461000	1000	*	84.89	71.22	13.66	Lead	4.82174	1.42e-06	0.00509736	NA	mm10_cpg_inter
chr19	12003001	12004000	1000	*	51.98	38.21	13.77	Lead	4.8044	1.55e-06	0.00509736	NA	mm10_cpg_inter
chr4	141319001	141320000	1000	*	100	86.21	13.79	Lead	5.69927	1.2e-08	0.000223598	Epha2	mm10_genes_exons
chr4	141319001	141320000	1000	*	100	86.21	13.79	Lead	5.69927	1.2e-08	0.000223598	Epha2	mm10_genes_introns
chr4	141319001	141320000	1000	*	100	86.21	13.79	Lead	5.69927	1.2e-08	0.000223598	NA	mm10_cpg_inter
chr7	4748001	4749000	1000	*	92.09	78.28	13.81	Lead	4.49958	6.81e-06	0.0126986	NA	mm10_cpg_inter
chr18	76146001	76147000	1000	*	49.51	35.49	14.02	Lead	4.86068	1.17e-06	0.00477297	Zbtb7c	mm10_genes_exons
chr18	76146001	76147000	1000	*	49.51	35.49	14.02	Lead	4.86068	1.17e-06	0.00477297	Zbtb7c	mm10_genes_introns
chr18	76146001	76147000	1000	*	49.51	35.49	14.02	Lead	4.86068	1.17e-06	0.00477297	Zbtb7c	mm10_genes_3UTRs
chr18	76146001	76147000	1000	*	49.51	35.49	14.02	Lead	4.86068	1.17e-06	0.00477297	NA	mm10_cpg_islands
chr18	76146001	76147000	1000	*	49.51	35.49	14.02	Lead	4.86068	1.17e-06	0.00477297	NA	mm10_cpg_shores
chr7	116803001	116804000	1000	*	91.48	77.19	14.29	Lead	5.25248	1.5e-07	0.00114358	NA	mm10_genes_exons
chr7	116803001	116804000	1000	*	91.48	77.19	14.29	Lead	5.25248	1.5e-07	0.00114358	NA	mm10_cpg_inter
chr14	69913001	69914000	1000	*	52.89	38.56	14.33	Lead	4.04026	5.34e-05	0.0452127	Pebp4	mm10_genes_introns
chr14	69913001	69914000	1000	*	52.89	38.56	14.33	Lead	4.04026	5.34e-05	0.0452127	NA	mm10_cpg_inter
chrX	20641001	20642000	1000	*	96.3	81.93	14.37	Lead	4.00065	6.32e-05	0.0491644	Rbm10	mm10_genes_exons
chrX	20641001	20642000	1000	*	96.3	81.93	14.37	Lead	4.00065	6.32e-05	0.0491644	Rbm10	mm10_genes_introns
chrX	20641001	20642000	1000	*	96.3	81.93	14.37	Lead	4.00065	6.32e-05	0.0491644	NA	mm10_cpg_inter
chr15	6794001	6795000	1000	*	76.39	61.44	14.95	Lead	4.81753	1.45e-06	0.00509736	Rictor	mm10_genes_exons
chr15	6794001	6795000	1000	*	76.39	61.44	14.95	Lead	4.81753	1.45e-06	0.00509736	Rictor	mm10_genes_introns
chr15	6794001	6795000	1000	*	76.39	61.44	14.95	Lead	4.81753	1.45e-06	0.00509736	NA	mm10_cpg_inter
chr4	124370001	124371000	1000	*	98.17	83.09	15.08	Lead	4.8383	1.31e-06	0.00489796	NA	mm10_cpg_inter
chr4	127969001	127970000	1000	*	18.95	3.55	15.39	Lead	4.0049	6.2e-05	0.0487648	CK137956	mm10_genes_introns
chr4	127969001	127970000	1000	*	18.95	3.55	15.39	Lead	4.0049	6.2e-05	0.0487648	NA	mm10_cpg_shores
chr4	127969001	127970000	1000	*	18.95	3.55	15.39	Lead	4.0049	6.2e-05	0.0487648	NA	mm10_cpg_shelves
chr4	112955001	112956000	1000	*	73.49	58.03	15.46	Lead	4.17848	2.93e-05	0.0329395	NA	mm10_genes_exons
chr4	112955001	112956000	1000	*	73.49	58.03	15.46	Lead	4.17848	2.93e-05	0.0329395	Skint6	mm10_genes_introns
chr4	112955001	112956000	1000	*	73.49	58.03	15.46	Lead	4.17848	2.93e-05	0.0329395	NA	mm10_cpg_inter
chr5	66857001	66858000	1000	*	74.05	57.24	16.8	Lead	4.19882	2.68e-05	0.031689	Limch1	mm10_genes_exons
chr5	66857001	66858000	1000	*	74.05	57.24	16.8	Lead	4.19882	2.68e-05	0.031689	Limch1	mm10_genes_introns
chr5	66857001	66858000	1000	*	74.05	57.24	16.8	Lead	4.19882	2.68e-05	0.031689	NA	mm10_cpg_inter
chr4	150258001	150259000	1000	*	50.62	33.69	16.93	Lead	6.08796	1.14e-09	5.13e-05	NA	mm10_cpg_inter
chr11	100722001	100723000	1000	*	18.81	0	18.81	Lead	6.23438	4.54e-10	3.05e-05	Rab5c	mm10_genes_introns
chr11	100722001	100723000	1000	*	18.81	0	18.81	Lead	6.23438	4.54e-10	3.05e-05	NA	mm10_cpg_inter
chrX	20694001	20695000	1000	*	96.13	75.81	20.32	Lead	4.77693	1.78e-06	0.0054116	Cdk16	mm10_genes_promoters
chrX	20694001	20695000	1000	*	96.13	75.81	20.32	Lead	4.77693	1.78e-06	0.0054116	Cdk16	mm10_genes_1to5kb
chrX	20694001	20695000	1000	*	96.13	75.81	20.32	Lead	4.77693	1.78e-06	0.0054116	Cdk16	mm10_genes_exons
chrX	20694001	20695000	1000	*	96.13	75.81	20.32	Lead	4.77693	1.78e-06	0.0054116	Cdk16	mm10_genes_introns
chrX	20694001	20695000	1000	*	96.13	75.81	20.32	Lead	4.77693	1.78e-06	0.0054116	NA	mm10_cpg_inter
chr17	86987001	86988000	1000	*	46.72	24.54	22.19	Lead	4.80839	1.52e-06	0.00509736	Rhoq	mm10_genes_introns
chr17	86987001	86988000	1000	*	46.72	24.54	22.19	Lead	4.80839	1.52e-06	0.00509736	NA	mm10_cpg_inter
chr14	52003001	52004000	1000	*	100	76.38	23.62	Lead	6.25898	3.87e-10	3.05e-05	Arhgef40	mm10_genes_promoters
chr14	52003001	52004000	1000	*	100	76.38	23.62	Lead	6.25898	3.87e-10	3.05e-05	Arhgef40	mm10_genes_1to5kb
chr14	52003001	52004000	1000	*	100	76.38	23.62	Lead	6.25898	3.87e-10	3.05e-05	Arhgef40	mm10_genes_exons
chr14	52003001	52004000	1000	*	100	76.38	23.62	Lead	6.25898	3.87e-10	3.05e-05	Arhgef40	mm10_genes_introns
chr14	52003001	52004000	1000	*	100	76.38	23.62	Lead	6.25898	3.87e-10	3.05e-05	Arhgef40	mm10_genes_3UTRs
chr14	52003001	52004000	1000	*	100	76.38	23.62	Lead	6.25898	3.87e-10	3.05e-05	NA	mm10_cpg_shelves
chr7	44600001	44601000	1000	*	96.21	72.49	23.72	Lead	5.44615	5.15e-08	0.00063005	NA	mm10_genes_1to5kb
chr7	44600001	44601000	1000	*	96.21	72.49	23.72	Lead	5.44615	5.15e-08	0.00063005	Kcnc3	mm10_genes_exons
chr7	44600001	44601000	1000	*	96.21	72.49	23.72	Lead	5.44615	5.15e-08	0.00063005	Kcnc3	mm10_genes_introns
chr7	44600001	44601000	1000	*	96.21	72.49	23.72	Lead	5.44615	5.15e-08	0.00063005	Kcnc3	mm10_genes_3UTRs
chr7	44600001	44601000	1000	*	96.21	72.49	23.72	Lead	5.44615	5.15e-08	0.00063005	NA	mm10_cpg_inter
chr8	59676001	59677000	1000	*	93.48	69.3	24.18	Lead	4.04447	5.24e-05	0.0446902	NA	mm10_cpg_inter
chr5	119836001	119837000	1000	*	26.42	1.33	25.08	Lead	4.6517	3.29e-06	0.00806068	Tbx5	mm10_genes_promoters
chr5	119836001	119837000	1000	*	26.42	1.33	25.08	Lead	4.6517	3.29e-06	0.00806068	NA	mm10_genes_1to5kb
chr5	119836001	119837000	1000	*	26.42	1.33	25.08	Lead	4.6517	3.29e-06	0.00806068	Tbx5	mm10_genes_5UTRs
chr5	119836001	119837000	1000	*	26.42	1.33	25.08	Lead	4.6517	3.29e-06	0.00806068	Tbx5	mm10_genes_exons
chr5	119836001	119837000	1000	*	26.42	1.33	25.08	Lead	4.6517	3.29e-06	0.00806068	Tbx5	mm10_genes_introns
chr5	119836001	119837000	1000	*	26.42	1.33	25.08	Lead	4.6517	3.29e-06	0.00806068	NA	mm10_cpg_inter
chr5	151341001	151342000	1000	*	100	74	26	Lead	3.99262	6.53e-05	0.0497087	Stard13	mm10_genes_introns
chr5	151341001	151342000	1000	*	100	74	26	Lead	3.99262	6.53e-05	0.0497087	NA	mm10_cpg_inter
chr9	109103001	109104000	1000	*	70.37	42.98	27.39	Lead	4.47391	7.68e-06	0.0134295	Plxnb1	mm10_genes_promoters
chr9	109103001	109104000	1000	*	70.37	42.98	27.39	Lead	4.47391	7.68e-06	0.0134295	Plxnb1	mm10_genes_1to5kb
chr9	109103001	109104000	1000	*	70.37	42.98	27.39	Lead	4.47391	7.68e-06	0.0134295	Plxnb1	mm10_genes_exons
chr9	109103001	109104000	1000	*	70.37	42.98	27.39	Lead	4.47391	7.68e-06	0.0134295	Plxnb1	mm10_genes_introns
chr9	109103001	109104000	1000	*	70.37	42.98	27.39	Lead	4.47391	7.68e-06	0.0134295	NA	mm10_cpg_inter
chr19	42743001	42744000	1000	*	55.4	25.18	30.22	Lead	5.04718	4.48e-07	0.00287488	NA	mm10_genes_1to5kb
chr19	42743001	42744000	1000	*	55.4	25.18	30.22	Lead	5.04718	4.48e-07	0.00287488	Pyroxd2	mm10_genes_introns
chr19	42743001	42744000	1000	*	55.4	25.18	30.22	Lead	5.04718	4.48e-07	0.00287488	NA	mm10_cpg_inter
chr2	163354001	163355000	1000	*	30.43	0	30.43	Lead	4.09044	4.31e-05	0.0404163	Jph2	mm10_genes_introns
chr2	163354001	163355000	1000	*	30.43	0	30.43	Lead	4.09044	4.31e-05	0.0404163	NA	mm10_cpg_inter
chr16	7049001	7050000	1000	*	45.61	14.81	30.8	Lead	4.72117	2.34e-06	0.00644356	Rbfox1	mm10_genes_introns
chr16	7049001	7050000	1000	*	45.61	14.81	30.8	Lead	4.72117	2.34e-06	0.00644356	NA	mm10_cpg_inter
chr13	63660001	63661000	1000	*	49.57	17.02	32.54	Lead	4.12279	3.74e-05	0.0390687	NA	mm10_genes_promoters
chr13	63660001	63661000	1000	*	49.57	17.02	32.54	Lead	4.12279	3.74e-05	0.0390687	NA	mm10_genes_1to5kb
chr13	63660001	63661000	1000	*	49.57	17.02	32.54	Lead	4.12279	3.74e-05	0.0390687	NA	mm10_cpg_inter
chr10	66199001	66200000	1000	*	56.96	24.16	32.8	Lead	5.85559	4.75e-09	0.000106664	1700023F02Rik	mm10_genes_introns
chr10	66199001	66200000	1000	*	56.96	24.16	32.8	Lead	5.85559	4.75e-09	0.000106664	NA	mm10_cpg_inter
chr6	61298001	61299000	1000	*	89.66	53.06	36.59	Lead	4.28806	1.8e-05	0.0247636	Ccser1	mm10_genes_introns
chr6	61298001	61299000	1000	*	89.66	53.06	36.59	Lead	4.28806	1.8e-05	0.0247636	NA	mm10_cpg_inter
chr15	101766001	101767000	1000	*	79.44	39.13	40.31	Lead	6.00244	1.94e-09	6.54e-05	Krt74	mm10_genes_1to5kb
chr15	101766001	101767000	1000	*	79.44	39.13	40.31	Lead	6.00244	1.94e-09	6.54e-05	NA	mm10_cpg_inter
chr7	82410001	82411000	1000	*	61.7	19.74	41.97	Lead	4.90707	9.24e-07	0.0042025	Adamtsl3	mm10_genes_introns
chr7	82410001	82411000	1000	*	61.7	19.74	41.97	Lead	4.90707	9.24e-07	0.0042025	NA	mm10_cpg_inter
chr12	111669001	111670000	1000	*	67.83	24.18	43.65	Lead	4.22333	2.41e-05	0.0294649	Ckb	mm10_genes_exons
chr12	111669001	111670000	1000	*	67.83	24.18	43.65	Lead	4.22333	2.41e-05	0.0294649	Ckb	mm10_genes_introns
chr12	111669001	111670000	1000	*	67.83	24.18	43.65	Lead	4.22333	2.41e-05	0.0294649	Ckb	mm10_genes_3UTRs
chr12	111669001	111670000	1000	*	67.83	24.18	43.65	Lead	4.22333	2.41e-05	0.0294649	NA	mm10_cpg_shores
chr7	29231001	29232000	1000	*	47.73	0	47.73	Lead	4.84287	1.28e-06	0.00489796	Kcnk6	mm10_genes_promoters
chr7	29231001	29232000	1000	*	47.73	0	47.73	Lead	4.84287	1.28e-06	0.00489796	Kcnk6	mm10_genes_exons
chr7	29231001	29232000	1000	*	47.73	0	47.73	Lead	4.84287	1.28e-06	0.00489796	Kcnk6	mm10_genes_introns
chr7	29231001	29232000	1000	*	47.73	0	47.73	Lead	4.84287	1.28e-06	0.00489796	NA	mm10_cpg_shores
chr15	85509001	85510000	1000	*	100	44.12	55.88	Lead	4.28324	1.84e-05	0.0248006	NA	mm10_genes_promoters
chr15	85509001	85510000	1000	*	100	44.12	55.88	Lead	4.28324	1.84e-05	0.0248006	NA	mm10_genes_1to5kb
chr15	85509001	85510000	1000	*	100	44.12	55.88	Lead	4.28324	1.84e-05	0.0248006	NA	mm10_cpg_shores

## Sheet: S7
Table S7: DMCs in Pb-treated females
seqnames_F	start_F	end	width	strand	meth_case_F	meth_control_F	meth_diff_F	direction_F	stat_F	pvalue_F	fdr_F	annot.symbol	annot.type_F
chr5	100091855	100091855	1	*	3.57	78.43	-74.86	control	9.52369	1.67e-21	1.12e-15	Tmem150cos	mm10_genes_promoters
chr5	100091855	100091855	1	*	3.57	78.43	-74.86	control	9.52369	1.67e-21	1.12e-15	Tmem150cos	mm10_genes_introns
chr5	100091855	100091855	1	*	3.57	78.43	-74.86	control	9.52369	1.67e-21	1.12e-15	Tmem150c	mm10_genes_introns
chr5	100091855	100091855	1	*	3.57	78.43	-74.86	control	9.52369	1.67e-21	1.12e-15	NA	mm10_cpg_inter
chr7	10940402	10940402	1	*	18.42	85.19	-66.76	control	6.70943	1.95e-11	3.28e-06	NA	mm10_cpg_inter
chr17	29241568	29241568	1	*	20	78.46	-58.46	control	5.24129	1.59e-07	0.00225677	Cpne5	mm10_genes_1to5kb
chr17	29241568	29241568	1	*	20	78.46	-58.46	control	5.24129	1.59e-07	0.00225677	NA	mm10_cpg_shelves
chr8	18970625	18970625	1	*	30.77	85.53	-54.76	control	4.62805	3.69e-06	0.0174746	NA	mm10_cpg_inter
chr11	76767186	76767186	1	*	29.55	84.27	-54.72	control	6.50965	7.53e-11	8.44e-06	Gosr1	mm10_genes_1to5kb
chr11	76767186	76767186	1	*	29.55	84.27	-54.72	control	6.50965	7.53e-11	8.44e-06	NA	mm10_cpg_inter
chr7	113593254	113593254	1	*	33.33	87.8	-54.47	control	4.24717	2.16e-05	0.0460543	NA	mm10_cpg_inter
chr2	74063883	74063883	1	*	12.99	59.15	-46.17	control	5.2485	1.53e-07	0.00225677	NA	mm10_cpg_inter
chr11	75976982	75976982	1	*	38.1	83.33	-45.24	control	5.28795	1.24e-07	0.00207873	NA	mm10_cpg_inter
chr17	35506600	35506600	1	*	17.91	58.16	-40.25	control	5.13019	2.89e-07	0.00321547	Pou5f1	mm10_genes_promoters
chr17	35506600	35506600	1	*	17.91	58.16	-40.25	control	5.13019	2.89e-07	0.00321547	Pou5f1	mm10_genes_1to5kb
chr17	35506600	35506600	1	*	17.91	58.16	-40.25	control	5.13019	2.89e-07	0.00321547	Pou5f1	mm10_genes_introns
chr17	35506600	35506600	1	*	17.91	58.16	-40.25	control	5.13019	2.89e-07	0.00321547	NA	mm10_cpg_inter
chr11	57479823	57479823	1	*	44.94	84.62	-39.67	control	4.64912	3.33e-06	0.016357	NA	mm10_cpg_inter
chr5	75451062	75451062	1	*	54.93	94.55	-39.62	control	5.64723	1.63e-08	0.00055338	NA	mm10_cpg_inter
chr10	10620851	10620851	1	*	57.14	96.61	-39.47	control	4.50571	6.62e-06	0.0243003	NA	mm10_cpg_inter
chr11	102665895	102665895	1	*	27.66	66.67	-39.01	control	4.32444	1.53e-05	0.0392349	Meioc	mm10_genes_introns
chr11	102665895	102665895	1	*	27.66	66.67	-39.01	control	4.32444	1.53e-05	0.0392349	NA	mm10_cpg_islands
chr5	129387582	129387582	1	*	9.3	48.15	-38.85	control	4.65671	3.21e-06	0.0159989	NA	mm10_cpg_inter
chr8	96079750	96079750	1	*	63.04	100	-36.96	control	4.77892	1.76e-06	0.0107704	NA	mm10_cpg_inter
chrX	131978070	131978070	1	*	45	81.33	-36.33	control	6.48255	9.02e-11	8.66e-06	NA	mm10_cpg_inter
chr19	59057871	59057871	1	*	9.38	44.93	-35.55	control	4.40607	1.05e-05	0.0307656	Shtn1	mm10_genes_introns
chr19	59057871	59057871	1	*	9.38	44.93	-35.55	control	4.40607	1.05e-05	0.0307656	NA	mm10_cpg_inter
chrX	12068589	12068589	1	*	2.94	37.31	-34.37	control	4.42278	9.74e-06	0.0294993	Bcor	mm10_genes_introns
chrX	12068589	12068589	1	*	2.94	37.31	-34.37	control	4.42278	9.74e-06	0.0294993	NA	mm10_cpg_inter
chr1	151817212	151817212	1	*	46.43	80.23	-33.8	control	4.30636	1.66e-05	0.0410171	Edem3	mm10_genes_introns
chr1	151817212	151817212	1	*	46.43	80.23	-33.8	control	4.30636	1.66e-05	0.0410171	NA	mm10_cpg_inter
chr19	30667577	30667577	1	*	30.23	63.74	-33.5	control	4.58541	4.53e-06	0.0197782	Prkg1	mm10_genes_introns
chr19	30667577	30667577	1	*	30.23	63.74	-33.5	control	4.58541	4.53e-06	0.0197782	NA	mm10_cpg_inter
chr11	75976976	75976976	1	*	47.62	80.95	-33.33	control	4.91822	8.73e-07	0.00690679	NA	mm10_cpg_inter
chr11	69817317	69817317	1	*	65	98.25	-33.25	control	4.70445	2.55e-06	0.0138091	NA	mm10_genes_1to5kb
chr11	69817317	69817317	1	*	65	98.25	-33.25	control	4.70445	2.55e-06	0.0138091	Spem2	mm10_genes_exons
chr11	69817317	69817317	1	*	65	98.25	-33.25	control	4.70445	2.55e-06	0.0138091	NA	mm10_cpg_inter
chr4	125471447	125471447	1	*	61.02	94.05	-33.03	control	5.22881	1.71e-07	0.00225677	NA	mm10_cpg_inter
chr5	66365047	66365047	1	*	52.75	85.58	-32.83	control	4.60719	4.08e-06	0.0185386	Apbb2	mm10_genes_exons
chr5	66365047	66365047	1	*	52.75	85.58	-32.83	control	4.60719	4.08e-06	0.0185386	NA	mm10_cpg_inter
chr2	84195087	84195087	1	*	56.32	88.81	-32.48	control	4.30457	1.67e-05	0.0410475	NA	mm10_cpg_inter
chr7	81058925	81058925	1	*	0	30.49	-30.49	control	4.45338	8.45e-06	0.027969	NA	mm10_genes_promoters
chr7	81058925	81058925	1	*	0	30.49	-30.49	control	4.45338	8.45e-06	0.027969	Alpk3	mm10_genes_introns
chr7	81058925	81058925	1	*	0	30.49	-30.49	control	4.45338	8.45e-06	0.027969	NA	mm10_cpg_inter
chr3	35613379	35613379	1	*	60.81	90.48	-29.67	control	4.5185	6.23e-06	0.0234726	Gm6639	mm10_genes_introns
chr3	35613379	35613379	1	*	60.81	90.48	-29.67	control	4.5185	6.23e-06	0.0234726	NA	mm10_cpg_inter
chr6	48439229	48439229	1	*	63.93	92.94	-29.01	control	4.84864	1.24e-06	0.00847725	Zfp467	mm10_genes_exons
chr6	48439229	48439229	1	*	63.93	92.94	-29.01	control	4.84864	1.24e-06	0.00847725	Zfp467	mm10_genes_introns
chr6	48439229	48439229	1	*	63.93	92.94	-29.01	control	4.84864	1.24e-06	0.00847725	Zfp467	mm10_genes_3UTRs
chr6	48439229	48439229	1	*	63.93	92.94	-29.01	control	4.84864	1.24e-06	0.00847725	NA	mm10_cpg_islands
chr3	98750757	98750757	1	*	69.23	98.15	-28.92	control	4.19997	2.67e-05	0.049962	Zfp697	mm10_genes_introns
chr3	98750757	98750757	1	*	69.23	98.15	-28.92	control	4.19997	2.67e-05	0.049962	Hsd3b3	mm10_genes_introns
chr3	98750757	98750757	1	*	69.23	98.15	-28.92	control	4.19997	2.67e-05	0.049962	NA	mm10_cpg_inter
chr4	140791234	140791234	1	*	65.37	93.82	-28.45	control	4.92799	8.31e-07	0.0066745	Padi3	mm10_genes_exons
chr4	140791234	140791234	1	*	65.37	93.82	-28.45	control	4.92799	8.31e-07	0.0066745	NA	mm10_cpg_inter
chr7	73409362	73409362	1	*	58.95	87.18	-28.23	control	4.31507	1.6e-05	0.0403227	Rgma	mm10_genes_5UTRs
chr7	73409362	73409362	1	*	58.95	87.18	-28.23	control	4.31507	1.6e-05	0.0403227	Rgma	mm10_genes_exons
chr7	73409362	73409362	1	*	58.95	87.18	-28.23	control	4.31507	1.6e-05	0.0403227	NA	mm10_cpg_islands
chr15	79479555	79479555	1	*	71.26	99.03	-27.76	control	4.20724	2.59e-05	0.049962	NA	mm10_cpg_inter
chr7	143501778	143501778	1	*	0	27.47	-27.47	control	4.3273	1.51e-05	0.0390278	Phlda2	mm10_genes_exons
chr7	143501778	143501778	1	*	0	27.47	-27.47	control	4.3273	1.51e-05	0.0390278	Phlda2	mm10_genes_3UTRs
chr7	143501778	143501778	1	*	0	27.47	-27.47	control	4.3273	1.51e-05	0.0390278	NA	mm10_cpg_islands
chr7	16858543	16858543	1	*	23.7	50.71	-27.01	control	4.60835	4.06e-06	0.0185386	Prkd2	mm10_genes_1to5kb
chr7	16858543	16858543	1	*	23.7	50.71	-27.01	control	4.60835	4.06e-06	0.0185386	Prkd2	mm10_genes_introns
chr7	16858543	16858543	1	*	23.7	50.71	-27.01	control	4.60835	4.06e-06	0.0185386	NA	mm10_cpg_shelves
chr8	79118115	79118115	1	*	54.41	80.51	-26.1	control	4.30225	1.69e-05	0.0411089	Zfp827	mm10_genes_promoters
chr8	79118115	79118115	1	*	54.41	80.51	-26.1	control	4.30225	1.69e-05	0.0411089	Zfp827	mm10_genes_1to5kb
chr8	79118115	79118115	1	*	54.41	80.51	-26.1	control	4.30225	1.69e-05	0.0411089	Zfp827	mm10_genes_introns
chr8	79118115	79118115	1	*	54.41	80.51	-26.1	control	4.30225	1.69e-05	0.0411089	NA	mm10_cpg_inter
chr7	85175183	85175183	1	*	73.02	98.86	-25.85	control	5.14387	2.69e-07	0.00306638	NA	mm10_cpg_inter
chr17	32396762	32396762	1	*	8.99	34.65	-25.66	control	4.29783	1.72e-05	0.0414085	NA	mm10_genes_promoters
chr17	32396762	32396762	1	*	8.99	34.65	-25.66	control	4.29783	1.72e-05	0.0414085	Rasal3	mm10_genes_promoters
chr17	32396762	32396762	1	*	8.99	34.65	-25.66	control	4.29783	1.72e-05	0.0414085	Rasal3	mm10_genes_1to5kb
chr17	32396762	32396762	1	*	8.99	34.65	-25.66	control	4.29783	1.72e-05	0.0414085	Rasal3	mm10_genes_exons
chr17	32396762	32396762	1	*	8.99	34.65	-25.66	control	4.29783	1.72e-05	0.0414085	NA	mm10_cpg_islands
chr16	43813717	43813717	1	*	74.55	100	-25.45	control	4.32023	1.56e-05	0.039839	Drd3	mm10_genes_introns
chr16	43813717	43813717	1	*	74.55	100	-25.45	control	4.32023	1.56e-05	0.039839	NA	mm10_cpg_inter
chrX	75578030	75578030	1	*	3.74	28.57	-24.83	control	4.65315	3.27e-06	0.016158	Rab39b	mm10_genes_5UTRs
chrX	75578030	75578030	1	*	3.74	28.57	-24.83	control	4.65315	3.27e-06	0.016158	Rab39b	mm10_genes_exons
chrX	75578030	75578030	1	*	3.74	28.57	-24.83	control	4.65315	3.27e-06	0.016158	NA	mm10_cpg_islands
chr9	106279633	106279633	1	*	75.44	100	-24.56	control	4.82464	1.4e-06	0.00897927	Poc1a	mm10_genes_1to5kb
chr9	106279633	106279633	1	*	75.44	100	-24.56	control	4.82464	1.4e-06	0.00897927	NA	mm10_cpg_inter
chr16	64918995	64918995	1	*	70.19	93.51	-23.31	control	4.48122	7.42e-06	0.0259855	NA	mm10_genes_promoters
chr16	64918995	64918995	1	*	70.19	93.51	-23.31	control	4.48122	7.42e-06	0.0259855	NA	mm10_genes_exons
chr16	64918995	64918995	1	*	70.19	93.51	-23.31	control	4.48122	7.42e-06	0.0259855	NA	mm10_cpg_inter
chr16	18999320	18999320	1	*	31.11	54.22	-23.11	control	4.30183	1.69e-05	0.0411089	NA	mm10_cpg_inter
chr3	120961754	120961754	1	*	46.53	69.34	-22.81	control	4.28016	1.87e-05	0.0430185	NA	mm10_cpg_inter
chr13	31328677	31328677	1	*	75.51	97	-21.49	control	4.45145	8.53e-06	0.027969	NA	mm10_genes_exons
chr13	31328677	31328677	1	*	75.51	97	-21.49	control	4.45145	8.53e-06	0.027969	NA	mm10_cpg_inter
chr10	76603851	76603851	1	*	72.69	94.04	-21.35	control	4.40451	1.06e-05	0.0308532	Col6a2	mm10_genes_exons
chr10	76603851	76603851	1	*	72.69	94.04	-21.35	control	4.40451	1.06e-05	0.0308532	NA	mm10_cpg_inter
chr3	65613541	65613541	1	*	77.08	97.9	-20.82	control	5.62767	1.83e-08	0.000584703	NA	mm10_genes_promoters
chr3	65613541	65613541	1	*	77.08	97.9	-20.82	control	5.62767	1.83e-08	0.000584703	NA	mm10_cpg_inter
chr3	79204579	79204579	1	*	36.22	56.31	-20.09	control	4.50452	6.65e-06	0.0243003	Rapgef2	mm10_genes_introns
chr3	79204579	79204579	1	*	36.22	56.31	-20.09	control	4.50452	6.65e-06	0.0243003	NA	mm10_cpg_inter
chr16	36530087	36530087	1	*	76	95.68	-19.68	control	4.33249	1.47e-05	0.0384192	Casr	mm10_genes_introns
chr16	36530087	36530087	1	*	76	95.68	-19.68	control	4.33249	1.47e-05	0.0384192	NA	mm10_cpg_inter
chr1	44419104	44419104	1	*	64.72	82.93	-18.21	control	4.20372	2.63e-05	0.049962	NA	mm10_cpg_inter
chr6	144256384	144256384	1	*	17.68	35.81	-18.13	control	4.30873	1.64e-05	0.0410171	Sox5	mm10_genes_introns
chr6	144256384	144256384	1	*	17.68	35.81	-18.13	control	4.30873	1.64e-05	0.0410171	NA	mm10_cpg_inter
chr15	98857649	98857649	1	*	81.29	98.94	-17.65	control	6.02966	1.64e-09	7.89e-05	Kmt2d	mm10_genes_1to5kb
chr15	98857649	98857649	1	*	81.29	98.94	-17.65	control	6.02966	1.64e-09	7.89e-05	Kmt2d	mm10_genes_introns
chr15	98857649	98857649	1	*	81.29	98.94	-17.65	control	6.02966	1.64e-09	7.89e-05	NA	mm10_cpg_inter
chr2	49729075	49729075	1	*	67.36	84.85	-17.49	control	5.34975	8.81e-08	0.00174143	Kif5c	mm10_genes_1to5kb
chr2	49729075	49729075	1	*	67.36	84.85	-17.49	control	5.34975	8.81e-08	0.00174143	Kif5c	mm10_genes_introns
chr2	49729075	49729075	1	*	67.36	84.85	-17.49	control	5.34975	8.81e-08	0.00174143	NA	mm10_cpg_inter
chr16	44608343	44608343	1	*	48.7	66.18	-17.48	control	4.49539	6.94e-06	0.0248303	NA	mm10_cpg_inter
chr16	44496335	44496335	1	*	83.04	100	-16.96	control	4.79338	1.64e-06	0.010303	Boc	mm10_genes_exons
chr16	44496335	44496335	1	*	83.04	100	-16.96	control	4.79338	1.64e-06	0.010303	NA	mm10_cpg_inter
chr15	102249590	102249590	1	*	1.04	17.82	-16.78	control	4.55956	5.13e-06	0.0212706	Rarg	mm10_genes_1to5kb
chr15	102249590	102249590	1	*	1.04	17.82	-16.78	control	4.55956	5.13e-06	0.0212706	Rarg	mm10_genes_introns
chr15	102249590	102249590	1	*	1.04	17.82	-16.78	control	4.55956	5.13e-06	0.0212706	NA	mm10_cpg_shores
chr14	57542581	57542581	1	*	54.57	71.34	-16.77	control	4.64066	3.47e-06	0.0167961	Il17d	mm10_genes_exons
chr14	57542581	57542581	1	*	54.57	71.34	-16.77	control	4.64066	3.47e-06	0.0167961	NA	mm10_cpg_islands
chr17	64047343	64047343	1	*	83.33	100	-16.67	control	4.24503	2.19e-05	0.0462034	Fer	mm10_genes_introns
chr17	64047343	64047343	1	*	83.33	100	-16.67	control	4.24503	2.19e-05	0.0462034	NA	mm10_cpg_inter
chr13	9834364	9834364	1	*	2.29	18.94	-16.65	control	4.58975	4.44e-06	0.0194981	NA	mm10_cpg_inter
chr4	93044216	93044216	1	*	68.56	84.99	-16.43	control	4.57677	4.72e-06	0.0204795	NA	mm10_cpg_inter
chr18	42809053	42809053	1	*	34.91	51.06	-16.15	control	4.218	2.46e-05	0.0487333	Ppp2r2b	mm10_genes_introns
chr18	42809053	42809053	1	*	34.91	51.06	-16.15	control	4.218	2.46e-05	0.0487333	NA	mm10_cpg_inter
chr16	38636916	38636916	1	*	25.58	41.57	-15.99	control	4.3363	1.45e-05	0.0384192	Arhgap31	mm10_genes_exons
chr16	38636916	38636916	1	*	25.58	41.57	-15.99	control	4.3363	1.45e-05	0.0384192	NA	mm10_cpg_inter
chr8	122335932	122335932	1	*	80.21	95.98	-15.76	control	4.93562	7.99e-07	0.0066306	NA	mm10_genes_1to5kb
chr8	122335932	122335932	1	*	80.21	95.98	-15.76	control	4.93562	7.99e-07	0.0066306	Zfpm1	mm10_genes_exons
chr8	122335932	122335932	1	*	80.21	95.98	-15.76	control	4.93562	7.99e-07	0.0066306	Galnt2	mm10_genes_introns
chr8	122335932	122335932	1	*	80.21	95.98	-15.76	control	4.93562	7.99e-07	0.0066306	NA	mm10_cpg_islands
chr7	4684385	4684385	1	*	0	14.95	-14.95	control	4.49946	6.81e-06	0.0246212	Hspbp1	mm10_genes_exons
chr7	4684385	4684385	1	*	0	14.95	-14.95	control	4.49946	6.81e-06	0.0246212	NA	mm10_cpg_inter
chrX	37827050	37827050	1	*	64.06	78.98	-14.92	control	4.97454	6.54e-07	0.00578502	Rhox7a	mm10_genes_1to5kb
chrX	37827050	37827050	1	*	64.06	78.98	-14.92	control	4.97454	6.54e-07	0.00578502	Rhox6	mm10_genes_5UTRs
chrX	37827050	37827050	1	*	64.06	78.98	-14.92	control	4.97454	6.54e-07	0.00578502	Rhox6	mm10_genes_exons
chrX	37827050	37827050	1	*	64.06	78.98	-14.92	control	4.97454	6.54e-07	0.00578502	NA	mm10_cpg_islands
chr19	57139653	57139653	1	*	82.02	96.65	-14.63	control	4.21281	2.52e-05	0.0494298	Ablim1	mm10_genes_1to5kb
chr19	57139653	57139653	1	*	82.02	96.65	-14.63	control	4.21281	2.52e-05	0.0494298	Ablim1	mm10_genes_introns
chr19	57139653	57139653	1	*	82.02	96.65	-14.63	control	4.21281	2.52e-05	0.0494298	NA	mm10_cpg_inter
chr10	88728462	88728462	1	*	53.59	68.2	-14.61	control	4.27895	1.88e-05	0.0430811	Arl1	mm10_genes_1to5kb
chr10	88728462	88728462	1	*	53.59	68.2	-14.61	control	4.27895	1.88e-05	0.0430811	NA	mm10_cpg_shelves
chr1	137136984	137136984	1	*	84	98.59	-14.59	control	4.93192	8.14e-07	0.0066745	NA	mm10_cpg_inter
chr17	91088742	91088742	1	*	61.53	76.04	-14.51	control	4.24627	2.17e-05	0.0460932	Nrxn1	mm10_genes_promoters
chr17	91088742	91088742	1	*	61.53	76.04	-14.51	control	4.24627	2.17e-05	0.0460932	Nrxn1	mm10_genes_5UTRs
chr17	91088742	91088742	1	*	61.53	76.04	-14.51	control	4.24627	2.17e-05	0.0460932	Nrxn1	mm10_genes_exons
chr17	91088742	91088742	1	*	61.53	76.04	-14.51	control	4.24627	2.17e-05	0.0460932	NA	mm10_genes_introns
chr17	91088742	91088742	1	*	61.53	76.04	-14.51	control	4.24627	2.17e-05	0.0460932	NA	mm10_cpg_islands
chr1	106119558	106119558	1	*	85.71	100	-14.29	control	4.98779	6.11e-07	0.00570206	NA	mm10_cpg_inter
chr15	19530801	19530801	1	*	21.55	35.84	-14.29	control	4.197	2.7e-05	0.0499838	NA	mm10_cpg_inter
chr11	50234828	50234828	1	*	85.19	99.14	-13.95	control	4.71379	2.43e-06	0.0135084	NA	mm10_genes_1to5kb
chr11	50234828	50234828	1	*	85.19	99.14	-13.95	control	4.71379	2.43e-06	0.0135084	Mgat4b	mm10_genes_exons
chr11	50234828	50234828	1	*	85.19	99.14	-13.95	control	4.71379	2.43e-06	0.0135084	Mgat4b	mm10_genes_3UTRs
chr11	50234828	50234828	1	*	85.19	99.14	-13.95	control	4.71379	2.43e-06	0.0135084	NA	mm10_cpg_islands
chr7	142082459	142082459	1	*	82.72	96.62	-13.91	control	4.33246	1.47e-05	0.0384192	NA	mm10_genes_1to5kb
chr7	142082459	142082459	1	*	82.72	96.62	-13.91	control	4.33246	1.47e-05	0.0384192	Dusp8	mm10_genes_exons
chr7	142082459	142082459	1	*	82.72	96.62	-13.91	control	4.33246	1.47e-05	0.0384192	NA	mm10_cpg_islands
chr6	52204065	52204065	1	*	0	13.75	-13.75	control	5.23776	1.63e-07	0.00225677	Hoxa5	mm10_genes_exons
chr6	52204065	52204065	1	*	0	13.75	-13.75	control	5.23776	1.63e-07	0.00225677	Hoxaas3	mm10_genes_introns
chr6	52204065	52204065	1	*	0	13.75	-13.75	control	5.23776	1.63e-07	0.00225677	Hoxa2	mm10_genes_introns
chr6	52204065	52204065	1	*	0	13.75	-13.75	control	5.23776	1.63e-07	0.00225677	Hoxa3	mm10_genes_introns
chr6	52204065	52204065	1	*	0	13.75	-13.75	control	5.23776	1.63e-07	0.00225677	NA	mm10_cpg_islands
chr17	80373102	80373102	1	*	0	13.64	-13.64	control	5.35833	8.4e-08	0.00174143	NA	mm10_genes_promoters
chr17	80373102	80373102	1	*	0	13.64	-13.64	control	5.35833	8.4e-08	0.00174143	Arhgef33	mm10_genes_promoters
chr17	80373102	80373102	1	*	0	13.64	-13.64	control	5.35833	8.4e-08	0.00174143	Arhgef33	mm10_genes_exons
chr17	80373102	80373102	1	*	0	13.64	-13.64	control	5.35833	8.4e-08	0.00174143	Arhgef33	mm10_genes_introns
chr17	80373102	80373102	1	*	0	13.64	-13.64	control	5.35833	8.4e-08	0.00174143	NA	mm10_cpg_islands
chr6	55851584	55851584	1	*	33.18	46.71	-13.53	control	4.38166	1.18e-05	0.0332665	Itprid1	mm10_genes_introns
chr6	55851584	55851584	1	*	33.18	46.71	-13.53	control	4.38166	1.18e-05	0.0332665	NA	mm10_cpg_inter
chr8	46716512	46716512	1	*	23.85	37.16	-13.31	control	4.3068	1.66e-05	0.0410171	Gm16675	mm10_genes_introns
chr8	46716512	46716512	1	*	23.85	37.16	-13.31	control	4.3068	1.66e-05	0.0410171	NA	mm10_cpg_inter
chr12	101027067	101027067	1	*	22.19	35.42	-13.24	control	4.25965	2.05e-05	0.0447251	Ccdc88c	mm10_genes_introns
chr12	101027067	101027067	1	*	22.19	35.42	-13.24	control	4.25965	2.05e-05	0.0447251	NA	mm10_cpg_shores
chr9	45023263	45023263	1	*	26.71	39.81	-13.1	control	4.48966	7.13e-06	0.0252393	NA	mm10_cpg_inter
chrX	101697350	101697350	1	*	57.21	70.26	-13.05	control	4.28246	1.85e-05	0.0429935	NA	mm10_cpg_islands
chrX	93988787	93988787	1	*	37.04	50.04	-13	control	4.64226	3.45e-06	0.016787	NA	mm10_genes_exons
chrX	93988787	93988787	1	*	37.04	50.04	-13	control	4.64226	3.45e-06	0.016787	NA	mm10_cpg_islands
chr19	5756707	5756707	1	*	58.95	71.83	-12.88	control	4.52871	5.93e-06	0.0231708	Ltbp3	mm10_genes_promoters
chr19	5756707	5756707	1	*	58.95	71.83	-12.88	control	4.52871	5.93e-06	0.0231708	Ltbp3	mm10_genes_exons
chr19	5756707	5756707	1	*	58.95	71.83	-12.88	control	4.52871	5.93e-06	0.0231708	NA	mm10_cpg_shores
chr13	58022988	58022988	1	*	75.94	88.71	-12.77	control	4.21099	2.54e-05	0.0496211	Klhl3	mm10_genes_introns
chr13	58022988	58022988	1	*	75.94	88.71	-12.77	control	4.21099	2.54e-05	0.0496211	NA	mm10_cpg_inter
chr5	24474896	24474896	1	*	0	12.64	-12.64	control	4.53313	5.81e-06	0.0229809	Agap3	mm10_genes_1to5kb
chr5	24474896	24474896	1	*	0	12.64	-12.64	control	4.53313	5.81e-06	0.0229809	Agap3	mm10_genes_exons
chr5	24474896	24474896	1	*	0	12.64	-12.64	control	4.53313	5.81e-06	0.0229809	Agap3	mm10_genes_introns
chr5	24474896	24474896	1	*	0	12.64	-12.64	control	4.53313	5.81e-06	0.0229809	NA	mm10_cpg_islands
chr2	69799649	69799649	1	*	81.79	94.41	-12.62	control	4.23859	2.25e-05	0.046384	NA	mm10_genes_promoters
chr2	69799649	69799649	1	*	81.79	94.41	-12.62	control	4.23859	2.25e-05	0.046384	Phospho2	mm10_genes_exons
chr2	69799649	69799649	1	*	81.79	94.41	-12.62	control	4.23859	2.25e-05	0.046384	NA	mm10_cpg_inter
chr12	82348026	82348026	1	*	43.66	56.23	-12.57	control	4.2214	2.43e-05	0.0484295	Sipa1l1	mm10_genes_introns
chr12	82348026	82348026	1	*	43.66	56.23	-12.57	control	4.2214	2.43e-05	0.0484295	NA	mm10_cpg_inter
chr8	83270830	83270830	1	*	75.04	87.09	-12.05	control	4.36751	1.26e-05	0.0347656	Tbc1d9	mm10_genes_introns
chr8	83270830	83270830	1	*	75.04	87.09	-12.05	control	4.36751	1.26e-05	0.0347656	NA	mm10_cpg_inter
chr6	91706238	91706238	1	*	59.24	71.19	-11.95	control	4.60209	4.18e-06	0.0187449	NA	mm10_genes_1to5kb
chr6	91706238	91706238	1	*	59.24	71.19	-11.95	control	4.60209	4.18e-06	0.0187449	Slc6a6	mm10_genes_introns
chr6	91706238	91706238	1	*	59.24	71.19	-11.95	control	4.60209	4.18e-06	0.0187449	NA	mm10_cpg_inter
chr4	107151994	107151994	1	*	62.06	73.86	-11.81	control	5.33213	9.71e-08	0.00180357	Tceanc2	mm10_genes_introns
chr4	107151994	107151994	1	*	62.06	73.86	-11.81	control	5.33213	9.71e-08	0.00180357	NA	mm10_cpg_inter
chr12	66317573	66317573	1	*	81.11	92.82	-11.7	control	4.975	6.52e-07	0.00578502	NA	mm10_cpg_inter
chr12	116399067	116399067	1	*	68.07	79.77	-11.7	control	4.47494	7.64e-06	0.0264852	NA	mm10_cpg_inter
chr11	20450493	20450493	1	*	55.7	67.32	-11.62	control	4.21945	2.45e-05	0.0485636	NA	mm10_cpg_inter
chr6	26992792	26992792	1	*	59.46	70.92	-11.46	control	4.68186	2.84e-06	0.014814	NA	mm10_cpg_inter
chr14	83859312	83859312	1	*	82.58	93.92	-11.34	control	4.91088	9.07e-07	0.0070057	NA	mm10_cpg_inter
chr8	61516824	61516824	1	*	75.08	86.35	-11.27	control	4.56218	5.06e-06	0.0211373	Palld	mm10_genes_promoters
chr8	61516824	61516824	1	*	75.08	86.35	-11.27	control	4.56218	5.06e-06	0.0211373	Palld	mm10_genes_introns
chr8	61516824	61516824	1	*	75.08	86.35	-11.27	control	4.56218	5.06e-06	0.0211373	NA	mm10_cpg_shores
chr15	65462914	65462914	1	*	80.31	91.49	-11.19	control	5.43108	5.6e-08	0.0013946	NA	mm10_cpg_inter
chr15	78517080	78517080	1	*	75.29	86.44	-11.14	control	4.52348	6.08e-06	0.0234726	NA	mm10_cpg_inter
chr5	73865410	73865410	1	*	51.63	62.7	-11.07	control	4.45371	8.44e-06	0.027969	NA	mm10_cpg_inter
chr1	93135387	93135387	1	*	71.86	82.85	-10.98	control	4.54009	5.62e-06	0.0224994	Agxt	mm10_genes_promoters
chr1	93135387	93135387	1	*	71.86	82.85	-10.98	control	4.54009	5.62e-06	0.0224994	Agxt	mm10_genes_1to5kb
chr1	93135387	93135387	1	*	71.86	82.85	-10.98	control	4.54009	5.62e-06	0.0224994	Agxt	mm10_genes_exons
chr1	93135387	93135387	1	*	71.86	82.85	-10.98	control	4.54009	5.62e-06	0.0224994	NA	mm10_cpg_inter
chr18	12741551	12741551	1	*	0	10.95	-10.95	control	5.27537	1.32e-07	0.00212054	Cabyr	mm10_genes_introns
chr18	12741551	12741551	1	*	0	10.95	-10.95	control	5.27537	1.32e-07	0.00212054	NA	mm10_cpg_islands
chrX	103174189	103174189	1	*	58.64	69.51	-10.87	control	4.44602	8.75e-06	0.0282715	NA	mm10_cpg_inter
chr4	140845566	140845566	1	*	50.29	61.09	-10.8	control	4.45824	8.26e-06	0.0277595	Padi1	mm10_genes_exons
chr4	140845566	140845566	1	*	50.29	61.09	-10.8	control	4.45824	8.26e-06	0.0277595	NA	mm10_cpg_inter
chr8	121128632	121128632	1	*	0	10.77	-10.77	control	5.43829	5.38e-08	0.00139086	Foxl1	mm10_genes_exons
chr8	121128632	121128632	1	*	0	10.77	-10.77	control	5.43829	5.38e-08	0.00139086	Galnt2	mm10_genes_introns
chr8	121128632	121128632	1	*	0	10.77	-10.77	control	5.43829	5.38e-08	0.00139086	NA	mm10_cpg_islands
chr7	28300329	28300329	1	*	61.31	72.06	-10.74	control	4.31771	1.58e-05	0.0399932	Dll3	mm10_genes_introns
chr7	28300329	28300329	1	*	61.31	72.06	-10.74	control	4.31771	1.58e-05	0.0399932	NA	mm10_cpg_shores
chr14	70615208	70615208	1	*	79.52	90.15	-10.63	control	4.28816	1.8e-05	0.0421986	NA	mm10_genes_exons
chr14	70615208	70615208	1	*	79.52	90.15	-10.63	control	4.28816	1.8e-05	0.0421986	Dmtn	mm10_genes_introns
chr14	70615208	70615208	1	*	79.52	90.15	-10.63	control	4.28816	1.8e-05	0.0421986	NA	mm10_cpg_shelves
chr11	120522481	120522481	1	*	83.29	93.88	-10.58	control	4.20976	2.56e-05	0.0496674	NA	mm10_cpg_inter
chr19	5756861	5756861	1	*	21.48	32.05	-10.57	control	4.71706	2.39e-06	0.0134039	Ltbp3	mm10_genes_promoters
chr19	5756861	5756861	1	*	21.48	32.05	-10.57	control	4.71706	2.39e-06	0.0134039	Ltbp3	mm10_genes_exons
chr19	5756861	5756861	1	*	21.48	32.05	-10.57	control	4.71706	2.39e-06	0.0134039	NA	mm10_cpg_islands
chr5	33723846	33723846	1	*	37.71	48.21	-10.5	control	4.30694	1.66e-05	0.0410171	NA	mm10_genes_promoters
chr5	33723846	33723846	1	*	37.71	48.21	-10.5	control	4.30694	1.66e-05	0.0410171	Fgfr3	mm10_genes_5UTRs
chr5	33723846	33723846	1	*	37.71	48.21	-10.5	control	4.30694	1.66e-05	0.0410171	Fgfr3	mm10_genes_exons
chr5	33723846	33723846	1	*	37.71	48.21	-10.5	control	4.30694	1.66e-05	0.0410171	Fgfr3	mm10_genes_introns
chr5	33723846	33723846	1	*	37.71	48.21	-10.5	control	4.30694	1.66e-05	0.0410171	NA	mm10_cpg_islands
chr6	84585118	84585118	1	*	0	10.49	-10.49	control	4.57277	4.81e-06	0.0204881	Cyp26b1	mm10_genes_introns
chr6	84585118	84585118	1	*	0	10.49	-10.49	control	4.57277	4.81e-06	0.0204881	NA	mm10_cpg_islands
chr6	84585128	84585128	1	*	0	10.49	-10.49	control	4.57277	4.81e-06	0.0204881	Cyp26b1	mm10_genes_introns
chr6	84585128	84585128	1	*	0	10.49	-10.49	control	4.57277	4.81e-06	0.0204881	NA	mm10_cpg_islands
chr9	119725470	119725470	1	*	40.79	51.22	-10.43	control	4.37835	1.2e-05	0.0336273	NA	mm10_cpg_inter
chr8	105353513	105353513	1	*	42.84	53.18	-10.33	control	4.95432	7.26e-07	0.00625559	Slc9a5	mm10_genes_1to5kb
chr8	105353513	105353513	1	*	42.84	53.18	-10.33	control	4.95432	7.26e-07	0.00625559	Slc9a5	mm10_genes_exons
chr8	105353513	105353513	1	*	42.84	53.18	-10.33	control	4.95432	7.26e-07	0.00625559	NA	mm10_cpg_shelves
chr9	103427272	103427272	1	*	62.2	72.52	-10.32	control	4.53624	5.73e-06	0.0227784	NA	mm10_genes_1to5kb
chr9	103427272	103427272	1	*	62.2	72.52	-10.32	control	4.53624	5.73e-06	0.0227784	5830418P13Rik	mm10_genes_exons
chr9	103427272	103427272	1	*	62.2	72.52	-10.32	control	4.53624	5.73e-06	0.0227784	5830418P13Rik	mm10_genes_introns
chr9	103427272	103427272	1	*	62.2	72.52	-10.32	control	4.53624	5.73e-06	0.0227784	Bfsp2	mm10_genes_introns
chr9	103427272	103427272	1	*	62.2	72.52	-10.32	control	4.53624	5.73e-06	0.0227784	NA	mm10_cpg_inter
chr15	83511693	83511693	1	*	84.43	94.59	-10.16	control	4.29813	1.72e-05	0.0414085	Ttll1	mm10_genes_promoters
chr15	83511693	83511693	1	*	84.43	94.59	-10.16	control	4.29813	1.72e-05	0.0414085	NA	mm10_cpg_shores
chr12	97949366	97949366	1	*	82.66	92.76	-10.1	control	4.60488	4.13e-06	0.0186192	NA	mm10_cpg_inter
chr12	22031103	22031103	1	*	13.92	23.91	-10	control	4.84233	1.28e-06	0.00862642	NA	mm10_cpg_islands
chrX	11664965	11664965	1	*	19.86	9.58	10.28	Lead	4.87857	1.07e-06	0.00756151	NA	mm10_cpg_islands
chr10	79735558	79735558	1	*	21.95	11.52	10.43	Lead	4.20286	2.64e-05	0.049962	Hcn2	mm10_genes_exons
chr10	79735558	79735558	1	*	21.95	11.52	10.43	Lead	4.20286	2.64e-05	0.049962	Hcn2	mm10_genes_3UTRs
chr10	79735558	79735558	1	*	21.95	11.52	10.43	Lead	4.20286	2.64e-05	0.049962	NA	mm10_cpg_islands
chr14	54219658	54219658	1	*	92.36	81.91	10.44	Lead	4.70021	2.6e-06	0.0138346	NA	mm10_genes_promoters
chr14	54219658	54219658	1	*	92.36	81.91	10.44	Lead	4.70021	2.6e-06	0.0138346	NA	mm10_cpg_inter
chr5	121928518	121928518	1	*	59.07	48.48	10.59	Lead	5.09454	3.5e-07	0.0036719	Cux2	mm10_genes_1to5kb
chr5	121928518	121928518	1	*	59.07	48.48	10.59	Lead	5.09454	3.5e-07	0.0036719	Cux2	mm10_genes_introns
chr5	121928518	121928518	1	*	59.07	48.48	10.59	Lead	5.09454	3.5e-07	0.0036719	NA	mm10_cpg_inter
chr9	21152035	21152035	1	*	99.3	88.67	10.63	Lead	5.1895	2.11e-07	0.0026744	Cdc37	mm10_genes_1to5kb
chr9	21152035	21152035	1	*	99.3	88.67	10.63	Lead	5.1895	2.11e-07	0.0026744	NA	mm10_cpg_shores
chr13	91450002	91450002	1	*	89.83	79.14	10.69	Lead	4.8991	9.63e-07	0.00713758	NA	mm10_cpg_inter
chr7	14822994	14822994	1	*	96.89	86.08	10.81	Lead	4.70431	2.55e-06	0.0138091	NA	mm10_cpg_inter
chr3	87755966	87755966	1	*	51.86	40.78	11.07	Lead	4.31349	1.61e-05	0.0404594	Pear1	mm10_genes_1to5kb
chr3	87755966	87755966	1	*	51.86	40.78	11.07	Lead	4.31349	1.61e-05	0.0404594	Pear1	mm10_genes_exons
chr3	87755966	87755966	1	*	51.86	40.78	11.07	Lead	4.31349	1.61e-05	0.0404594	Pear1	mm10_genes_introns
chr3	87755966	87755966	1	*	51.86	40.78	11.07	Lead	4.31349	1.61e-05	0.0404594	Pear1	mm10_genes_3UTRs
chr3	87755966	87755966	1	*	51.86	40.78	11.07	Lead	4.31349	1.61e-05	0.0404594	NA	mm10_cpg_inter
chr16	89573296	89573296	1	*	83.01	71.92	11.09	Lead	4.45729	8.3e-06	0.0277595	Krtap11-1	mm10_genes_1to5kb
chr16	89573296	89573296	1	*	83.01	71.92	11.09	Lead	4.45729	8.3e-06	0.0277595	NA	mm10_cpg_inter
chr8	121567725	121567725	1	*	96.44	85.32	11.12	Lead	4.75062	2.03e-06	0.0119585	Galnt2	mm10_genes_introns
chr8	121567725	121567725	1	*	96.44	85.32	11.12	Lead	4.75062	2.03e-06	0.0119585	Fbxo31	mm10_genes_introns
chr8	121567725	121567725	1	*	96.44	85.32	11.12	Lead	4.75062	2.03e-06	0.0119585	NA	mm10_cpg_inter
chr6	74918662	74918662	1	*	94.37	83.25	11.12	Lead	4.22761	2.36e-05	0.0478221	NA	mm10_cpg_inter
chr18	57226531	57226531	1	*	96.58	85.29	11.28	Lead	4.75357	2e-06	0.0119585	Megf10	mm10_genes_introns
chr18	57226531	57226531	1	*	96.58	85.29	11.28	Lead	4.75357	2e-06	0.0119585	NA	mm10_cpg_inter
chr10	116331368	116331368	1	*	53.11	41.63	11.48	Lead	5.12868	2.92e-07	0.00321547	Ptprb	mm10_genes_exons
chr10	116331368	116331368	1	*	53.11	41.63	11.48	Lead	5.12868	2.92e-07	0.00321547	NA	mm10_cpg_inter
chr15	87416217	87416217	1	*	49.64	37.79	11.84	Lead	4.37749	1.2e-05	0.0336273	NA	mm10_cpg_inter
chr8	26714036	26714036	1	*	67.25	55.09	12.15	Lead	4.52769	5.96e-06	0.0231708	NA	mm10_cpg_inter
chr3	37063822	37063822	1	*	64.07	51.76	12.3	Lead	4.44061	8.97e-06	0.028579	NA	mm10_genes_1to5kb
chr3	37063822	37063822	1	*	64.07	51.76	12.3	Lead	4.44061	8.97e-06	0.028579	Adad1	mm10_genes_exons
chr3	37063822	37063822	1	*	64.07	51.76	12.3	Lead	4.44061	8.97e-06	0.028579	Adad1	mm10_genes_introns
chr3	37063822	37063822	1	*	64.07	51.76	12.3	Lead	4.44061	8.97e-06	0.028579	NA	mm10_cpg_islands
chr4	99405192	99405192	1	*	80.85	68.46	12.39	Lead	5.90434	3.54e-09	0.000140008	NA	mm10_cpg_inter
chr4	106639317	106639317	1	*	99.28	86.86	12.41	Lead	5.37858	7.51e-08	0.00162798	Ttc22	mm10_genes_exons
chr4	106639317	106639317	1	*	99.28	86.86	12.41	Lead	5.37858	7.51e-08	0.00162798	NA	mm10_cpg_islands
chr3	159046028	159046028	1	*	89.44	76.97	12.47	Lead	4.20265	2.64e-05	0.049962	NA	mm10_cpg_inter
chr1	191218338	191218338	1	*	54.39	41.87	12.52	Lead	4.69957	2.61e-06	0.0138346	Atf3	mm10_genes_promoters
chr1	191218338	191218338	1	*	54.39	41.87	12.52	Lead	4.69957	2.61e-06	0.0138346	NA	mm10_cpg_inter
chr8	122789211	122789211	1	*	90.32	76.73	13.59	Lead	4.20555	2.6e-05	0.049962	Galnt2	mm10_genes_introns
chr8	122789211	122789211	1	*	90.32	76.73	13.59	Lead	4.20555	2.6e-05	0.049962	Acsf3	mm10_genes_introns
chr8	122789211	122789211	1	*	90.32	76.73	13.59	Lead	4.20555	2.6e-05	0.049962	NA	mm10_cpg_inter
chr7	68355267	68355267	1	*	89.21	75.54	13.67	Lead	4.38355	1.17e-05	0.0331181	NA	mm10_genes_1to5kb
chr7	68355267	68355267	1	*	89.21	75.54	13.67	Lead	4.38355	1.17e-05	0.0331181	Fam169b	mm10_genes_introns
chr7	68355267	68355267	1	*	89.21	75.54	13.67	Lead	4.38355	1.17e-05	0.0331181	NA	mm10_cpg_inter
chr3	101207209	101207209	1	*	100	85.29	14.71	Lead	4.29693	1.73e-05	0.0414299	NA	mm10_genes_exons
chr3	101207209	101207209	1	*	100	85.29	14.71	Lead	4.29693	1.73e-05	0.0414299	NA	mm10_cpg_inter
chr9	68864619	68864619	1	*	99.13	84.39	14.74	Lead	4.33523	1.46e-05	0.0384192	Rora	mm10_genes_introns
chr9	68864619	68864619	1	*	99.13	84.39	14.74	Lead	4.33523	1.46e-05	0.0384192	NA	mm10_cpg_inter
chr8	85011494	85011494	1	*	14.78	0	14.78	Lead	4.87387	1.09e-06	0.00766281	Best2	mm10_genes_exons
chr8	85011494	85011494	1	*	14.78	0	14.78	Lead	4.87387	1.09e-06	0.00766281	NA	mm10_cpg_islands
chr1	51433830	51433830	1	*	100	85.15	14.85	Lead	4.23861	2.25e-05	0.046384	NA	mm10_cpg_inter
chr2	179293679	179293679	1	*	96.45	81.51	14.94	Lead	4.7939	1.64e-06	0.010303	NA	mm10_cpg_islands
chr7	128474588	128474588	1	*	58.1	42.77	15.33	Lead	4.30536	1.67e-05	0.0410475	NA	mm10_genes_exons
chr7	128474588	128474588	1	*	58.1	42.77	15.33	Lead	4.30536	1.67e-05	0.0410475	NA	mm10_cpg_inter
chr17	70739028	70739028	1	*	80.43	64.54	15.89	Lead	4.41812	9.96e-06	0.0297985	Dlgap1	mm10_genes_introns
chr17	70739028	70739028	1	*	80.43	64.54	15.89	Lead	4.41812	9.96e-06	0.0297985	NA	mm10_cpg_inter
chr3	104954712	104954712	1	*	97.06	81.13	15.93	Lead	4.89254	9.95e-07	0.00727329	Wnt2b	mm10_genes_exons
chr3	104954712	104954712	1	*	97.06	81.13	15.93	Lead	4.89254	9.95e-07	0.00727329	NA	mm10_cpg_inter
chr8	35232236	35232236	1	*	85.3	68.54	16.76	Lead	4.72553	2.3e-06	0.0129651	NA	mm10_cpg_inter
chr4	127325945	127325945	1	*	79.98	63.13	16.85	Lead	5.35446	8.58e-08	0.00174143	Gjb3	mm10_genes_exons
chr4	127325945	127325945	1	*	79.98	63.13	16.85	Lead	5.35446	8.58e-08	0.00174143	NA	mm10_cpg_shores
chr5	150904396	150904396	1	*	93.89	76.92	16.97	Lead	4.26732	1.98e-05	0.044182	NA	mm10_cpg_inter
chr16	32310885	32310885	1	*	85.1	67.4	17.7	Lead	4.45187	8.51e-06	0.027969	NA	mm10_cpg_inter
chr1	144065274	144065274	1	*	100	82.19	17.81	Lead	4.78121	1.74e-06	0.0107462	NA	mm10_cpg_inter
chr11	102160614	102160614	1	*	100	81.08	18.92	Lead	5.27672	1.32e-07	0.00212054	Tmem101	mm10_genes_1to5kb
chr11	102160614	102160614	1	*	100	81.08	18.92	Lead	5.27672	1.32e-07	0.00212054	NA	mm10_cpg_inter
chr10	81213217	81213217	1	*	88.07	68.9	19.17	Lead	4.42672	9.57e-06	0.0292354	Atcay	mm10_genes_introns
chr10	81213217	81213217	1	*	88.07	68.9	19.17	Lead	4.42672	9.57e-06	0.0292354	NA	mm10_cpg_inter
chr2	33649785	33649785	1	*	66.67	47.44	19.23	Lead	4.23789	2.26e-05	0.046384	NA	mm10_cpg_inter
chr6	149296597	149296597	1	*	98.19	78.72	19.47	Lead	4.33253	1.47e-05	0.0384192	NA	mm10_cpg_inter
chr4	136843004	136843004	1	*	92.25	72.28	19.97	Lead	4.90019	9.57e-07	0.00713758	NA	mm10_cpg_inter
chr6	120929074	120929074	1	*	100	79.17	20.83	Lead	5.07475	3.88e-07	0.00395204	NA	mm10_cpg_inter
chr12	70267694	70267694	1	*	100	79.17	20.83	Lead	4.25946	2.05e-05	0.0447251	NA	mm10_genes_introns
chr12	70267694	70267694	1	*	100	79.17	20.83	Lead	4.25946	2.05e-05	0.0447251	Trim9	mm10_genes_introns
chr12	70267694	70267694	1	*	100	79.17	20.83	Lead	4.25946	2.05e-05	0.0447251	NA	mm10_cpg_inter
chr6	124770677	124770677	1	*	97.98	77.05	20.93	Lead	5.58863	2.29e-08	0.000699344	Eno2	mm10_genes_1to5kb
chr6	124770677	124770677	1	*	97.98	77.05	20.93	Lead	5.58863	2.29e-08	0.000699344	Lrrc23	mm10_genes_exons
chr6	124770677	124770677	1	*	97.98	77.05	20.93	Lead	5.58863	2.29e-08	0.000699344	NA	mm10_cpg_shores
chr7	133580155	133580155	1	*	100	79.05	20.95	Lead	4.57267	4.82e-06	0.0204881	NA	mm10_cpg_inter
chr9	75382870	75382870	1	*	92.79	70.87	21.92	Lead	4.19832	2.69e-05	0.0499838	NA	mm10_genes_introns
chr9	75382870	75382870	1	*	92.79	70.87	21.92	Lead	4.19832	2.69e-05	0.0499838	NA	mm10_cpg_inter
chr10	21389343	21389343	1	*	95.05	70.91	24.14	Lead	4.29248	1.77e-05	0.0418225	Aldh8a1	mm10_genes_introns
chr10	21389343	21389343	1	*	95.05	70.91	24.14	Lead	4.29248	1.77e-05	0.0418225	NA	mm10_cpg_inter
chr10	72967562	72967562	1	*	90.14	65.62	24.52	Lead	4.2266	2.37e-05	0.0478932	NA	mm10_cpg_inter
chr17	34881799	34881799	1	*	38.95	14.06	24.88	Lead	4.27118	1.94e-05	0.0437266	Zbtb12	mm10_genes_introns
chr17	34881799	34881799	1	*	38.95	14.06	24.88	Lead	4.27118	1.94e-05	0.0437266	Cfb	mm10_genes_introns
chr17	34881799	34881799	1	*	38.95	14.06	24.88	Lead	4.27118	1.94e-05	0.0437266	C2	mm10_genes_introns
chr17	34881799	34881799	1	*	38.95	14.06	24.88	Lead	4.27118	1.94e-05	0.0437266	NA	mm10_cpg_inter
chr7	143948122	143948122	1	*	85.99	61.05	24.94	Lead	4.34192	1.41e-05	0.0377969	NA	mm10_cpg_inter
chr6	144251672	144251672	1	*	84.82	59.76	25.05	Lead	5.41166	6.24e-08	0.00144744	Sox5	mm10_genes_introns
chr6	144251672	144251672	1	*	84.82	59.76	25.05	Lead	5.41166	6.24e-08	0.00144744	NA	mm10_cpg_inter
chr12	101370057	101370057	1	*	100	74.14	25.86	Lead	4.25598	2.08e-05	0.0451331	NA	mm10_genes_introns
chr12	101370057	101370057	1	*	100	74.14	25.86	Lead	4.25598	2.08e-05	0.0451331	NA	mm10_cpg_inter
chrX	122215998	122215998	1	*	93.9	67.84	26.07	Lead	5.33703	9.45e-08	0.00180357	NA	mm10_cpg_inter
chr14	13116849	13116849	1	*	90.43	63.64	26.8	Lead	5.08204	3.73e-07	0.00386167	NA	mm10_cpg_inter
chr11	118132383	118132383	1	*	31.18	3.42	27.76	Lead	4.73233	2.22e-06	0.0126445	Dnah17	mm10_genes_1to5kb
chr11	118132383	118132383	1	*	31.18	3.42	27.76	Lead	4.73233	2.22e-06	0.0126445	Cyth1	mm10_genes_introns
chr11	118132383	118132383	1	*	31.18	3.42	27.76	Lead	4.73233	2.22e-06	0.0126445	NA	mm10_cpg_inter
chr10	20321108	20321108	1	*	93.55	65.12	28.43	Lead	4.24717	2.16e-05	0.0460543	Bclaf1	mm10_genes_1to5kb
chr10	20321108	20321108	1	*	93.55	65.12	28.43	Lead	4.24717	2.16e-05	0.0460543	Bclaf1	mm10_genes_introns
chr10	20321108	20321108	1	*	93.55	65.12	28.43	Lead	4.24717	2.16e-05	0.0460543	NA	mm10_cpg_inter
chr11	103442244	103442244	1	*	94.29	64.94	29.35	Lead	4.69905	2.61e-06	0.0138346	NA	mm10_cpg_inter
chr17	27667211	27667211	1	*	77.78	46.83	30.95	Lead	4.44336	8.86e-06	0.0284858	Pacsin1	mm10_genes_introns
chr17	27667211	27667211	1	*	77.78	46.83	30.95	Lead	4.44336	8.86e-06	0.0284858	NA	mm10_cpg_inter
chr15	98117367	98117367	1	*	96.3	63.64	32.66	Lead	5.23461	1.65e-07	0.00225677	Pfkm	mm10_genes_introns
chr15	98117367	98117367	1	*	96.3	63.64	32.66	Lead	5.23461	1.65e-07	0.00225677	NA	mm10_cpg_inter
chr7	28294463	28294463	1	*	55.26	22.52	32.74	Lead	4.89018	1.01e-06	0.00728194	Selenov	mm10_genes_1to5kb
chr7	28294463	28294463	1	*	55.26	22.52	32.74	Lead	4.89018	1.01e-06	0.00728194	Dll3	mm10_genes_exons
chr7	28294463	28294463	1	*	55.26	22.52	32.74	Lead	4.89018	1.01e-06	0.00728194	NA	mm10_cpg_islands
chr5	82653779	82653779	1	*	61.17	28.12	33.04	Lead	4.22309	2.41e-05	0.0482125	NA	mm10_cpg_inter
chr1	178571992	178571992	1	*	93.85	60.23	33.62	Lead	5.4943	3.92e-08	0.00109869	Kif26b	mm10_genes_introns
chr1	178571992	178571992	1	*	93.85	60.23	33.62	Lead	5.4943	3.92e-08	0.00109869	NA	mm10_cpg_inter
chr2	32741520	32741520	1	*	33.93	0	33.93	Lead	6.31289	2.74e-10	1.84e-05	6330409D20Rik	mm10_genes_promoters
chr2	32741520	32741520	1	*	33.93	0	33.93	Lead	6.31289	2.74e-10	1.84e-05	Sh2d3c	mm10_genes_exons
chr2	32741520	32741520	1	*	33.93	0	33.93	Lead	6.31289	2.74e-10	1.84e-05	Sh2d3c	mm10_genes_introns
chr2	32741520	32741520	1	*	33.93	0	33.93	Lead	6.31289	2.74e-10	1.84e-05	NA	mm10_cpg_islands
chr4	150781738	150781738	1	*	72.53	37.19	35.34	Lead	5.32806	9.93e-08	0.00180357	NA	mm10_cpg_inter
chr8	84636634	84636634	1	*	96.3	60.53	35.77	Lead	4.67589	2.93e-06	0.0149501	Cacna1a	mm10_genes_1to5kb
chr8	84636634	84636634	1	*	96.3	60.53	35.77	Lead	4.67589	2.93e-06	0.0149501	Cacna1a	mm10_genes_exons
chr8	84636634	84636634	1	*	96.3	60.53	35.77	Lead	4.67589	2.93e-06	0.0149501	NA	mm10_cpg_shelves
chr19	46654292	46654292	1	*	88.89	51.25	37.64	Lead	5.18562	2.15e-07	0.00268022	Wbp1l	mm10_genes_exons
chr19	46654292	46654292	1	*	88.89	51.25	37.64	Lead	5.18562	2.15e-07	0.00268022	Wbp1l	mm10_genes_3UTRs
chr19	46654292	46654292	1	*	88.89	51.25	37.64	Lead	5.18562	2.15e-07	0.00268022	NA	mm10_cpg_islands
chr5	146943204	146943204	1	*	95.83	57.14	38.69	Lead	5.77963	7.49e-09	0.000279593	NA	mm10_cpg_inter
chr8	122698947	122698947	1	*	97.37	57.89	39.47	Lead	5.31525	1.07e-07	0.00188416	Cbfa2t3	mm10_genes_promoters
chr8	122698947	122698947	1	*	97.37	57.89	39.47	Lead	5.31525	1.07e-07	0.00188416	Cbfa2t3	mm10_genes_5UTRs
chr8	122698947	122698947	1	*	97.37	57.89	39.47	Lead	5.31525	1.07e-07	0.00188416	NA	mm10_genes_exons
chr8	122698947	122698947	1	*	97.37	57.89	39.47	Lead	5.31525	1.07e-07	0.00188416	Cbfa2t3	mm10_genes_exons
chr8	122698947	122698947	1	*	97.37	57.89	39.47	Lead	5.31525	1.07e-07	0.00188416	Galnt2	mm10_genes_introns
chr8	122698947	122698947	1	*	97.37	57.89	39.47	Lead	5.31525	1.07e-07	0.00188416	NA	mm10_cpg_inter
chr8	74807717	74807717	1	*	100	59.3	40.7	Lead	6.41102	1.45e-10	1.08e-05	NA	mm10_genes_introns
chr8	74807717	74807717	1	*	100	59.3	40.7	Lead	6.41102	1.45e-10	1.08e-05	NA	mm10_cpg_inter
chr19	46654286	46654286	1	*	98.51	56.73	41.78	Lead	4.61822	3.87e-06	0.0179434	Wbp1l	mm10_genes_exons
chr19	46654286	46654286	1	*	98.51	56.73	41.78	Lead	4.61822	3.87e-06	0.0179434	Wbp1l	mm10_genes_3UTRs
chr19	46654286	46654286	1	*	98.51	56.73	41.78	Lead	4.61822	3.87e-06	0.0179434	NA	mm10_cpg_islands
chr11	98768277	98768277	1	*	45.71	1.39	44.33	Lead	6.22533	4.81e-10	2.69e-05	Thra	mm10_genes_exons
chr11	98768277	98768277	1	*	45.71	1.39	44.33	Lead	6.22533	4.81e-10	2.69e-05	Nr1d1	mm10_genes_exons
chr11	98768277	98768277	1	*	45.71	1.39	44.33	Lead	6.22533	4.81e-10	2.69e-05	NA	mm10_cpg_islands
chr7	31963552	31963552	1	*	95.45	50	45.45	Lead	4.73305	2.21e-06	0.0126445	NA	mm10_cpg_inter
chr1	13020848	13020848	1	*	98.33	51.61	46.72	Lead	6.63333	3.28e-11	4.41e-06	NA	mm10_cpg_inter
chr1	186433637	186433637	1	*	100	52.56	47.44	Lead	4.91367	8.94e-07	0.00698702	NA	mm10_cpg_inter
chr5	116444681	116444681	1	*	84.75	27.16	57.59	Lead	6.73035	1.69e-11	3.28e-06	Srrm4	mm10_genes_exons
chr5	116444681	116444681	1	*	84.75	27.16	57.59	Lead	6.73035	1.69e-11	3.28e-06	Srrm4os	mm10_genes_introns
chr5	116444681	116444681	1	*	84.75	27.16	57.59	Lead	6.73035	1.69e-11	3.28e-06	NA	mm10_cpg_islands

## Sheet: S8
Table S8: DMRs in Pb-treated females
seqnames_F	start_F	end_F	width	strand	meth_case_F	meth_control_F	meth_diff_F	direction_F	stat_F	pvalue_F	fdr_F	annot.symbol	annot.type_F
chr10	77667001	77668000	1000	*	18.18	78.26	-60.08	control	4.18504	2.85e-05	0.0253705	NA	mm10_cpg_shelves
chr1	135380001	135381000	1000	*	16.39	71.17	-54.78	control	4.12259	3.75e-05	0.0295043	Shisa4	mm10_genes_1to5kb
chr1	135380001	135381000	1000	*	16.39	71.17	-54.78	control	4.12259	3.75e-05	0.0295043	NA	mm10_cpg_inter
chr8	18970001	18971000	1000	*	30.77	85.53	-54.76	control	4.62805	3.69e-06	0.00743874	NA	mm10_cpg_inter
chr8	124921001	124922000	1000	*	5.88	59.49	-53.61	control	4.57102	4.85e-06	0.00898805	Egln1	mm10_genes_introns
chr8	124921001	124922000	1000	*	5.88	59.49	-53.61	control	4.57102	4.85e-06	0.00898805	NA	mm10_cpg_inter
chr3	3298001	3299000	1000	*	30	82.93	-52.93	control	6.74589	1.52e-11	1.04e-06	NA	mm10_cpg_inter
chr8	92997001	92998000	1000	*	20.69	73.42	-52.73	control	5.44298	5.24e-08	0.000470246	Slc6a2	mm10_genes_exons
chr8	92997001	92998000	1000	*	20.69	73.42	-52.73	control	5.44298	5.24e-08	0.000470246	Slc6a2	mm10_genes_introns
chr8	92997001	92998000	1000	*	20.69	73.42	-52.73	control	5.44298	5.24e-08	0.000470246	Slc6a2	mm10_genes_3UTRs
chr8	92997001	92998000	1000	*	20.69	73.42	-52.73	control	5.44298	5.24e-08	0.000470246	NA	mm10_cpg_inter
chr7	97748001	97749000	1000	*	33.73	81.74	-48	control	6.24213	4.32e-10	1.47e-05	NA	mm10_cpg_inter
chr11	76767001	76768000	1000	*	38.33	84.27	-45.94	control	5.65778	1.53e-08	0.000210135	Gosr1	mm10_genes_1to5kb
chr11	76767001	76768000	1000	*	38.33	84.27	-45.94	control	5.65778	1.53e-08	0.000210135	NA	mm10_cpg_inter
chr5	100091001	100092000	1000	*	5.93	50	-44.07	control	5.10485	3.31e-07	0.00162025	Tmem150cos	mm10_genes_promoters
chr5	100091001	100092000	1000	*	5.93	50	-44.07	control	5.10485	3.31e-07	0.00162025	Tmem150cos	mm10_genes_exons
chr5	100091001	100092000	1000	*	5.93	50	-44.07	control	5.10485	3.31e-07	0.00162025	Tmem150cos	mm10_genes_introns
chr5	100091001	100092000	1000	*	5.93	50	-44.07	control	5.10485	3.31e-07	0.00162025	Tmem150c	mm10_genes_introns
chr5	100091001	100092000	1000	*	5.93	50	-44.07	control	5.10485	3.31e-07	0.00162025	NA	mm10_cpg_inter
chr11	63938001	63939000	1000	*	56.32	96.15	-39.83	control	6.00671	1.89e-09	3.71e-05	NA	mm10_cpg_inter
chr5	129387001	129388000	1000	*	9.3	48.15	-38.85	control	4.65671	3.21e-06	0.00665407	NA	mm10_cpg_inter
chr10	69714001	69715000	1000	*	55.93	92.86	-36.92	control	5.42731	5.72e-08	0.000470246	Ank3	mm10_genes_introns
chr10	69714001	69715000	1000	*	55.93	92.86	-36.92	control	5.42731	5.72e-08	0.000470246	NA	mm10_cpg_inter
chr1	151817001	151818000	1000	*	46.43	83.02	-36.59	control	4.9139	8.93e-07	0.00330671	Edem3	mm10_genes_introns
chr1	151817001	151818000	1000	*	46.43	83.02	-36.59	control	4.9139	8.93e-07	0.00330671	NA	mm10_cpg_inter
chr16	35286001	35287000	1000	*	57.48	93.18	-35.71	control	4.96327	6.93e-07	0.00279436	NA	mm10_genes_exons
chr16	35286001	35287000	1000	*	57.48	93.18	-35.71	control	4.96327	6.93e-07	0.00279436	Adcy5	mm10_genes_introns
chr16	35286001	35287000	1000	*	57.48	93.18	-35.71	control	4.96327	6.93e-07	0.00279436	NA	mm10_cpg_inter
chr5	93643001	93644000	1000	*	58.18	93.1	-34.92	control	4.93888	7.86e-07	0.00307637	Pramel34	mm10_genes_1to5kb
chr5	93643001	93644000	1000	*	58.18	93.1	-34.92	control	4.93888	7.86e-07	0.00307637	Pramel34	mm10_genes_introns
chr5	93643001	93644000	1000	*	58.18	93.1	-34.92	control	4.93888	7.86e-07	0.00307637	NA	mm10_cpg_inter
chr2	31304001	31305000	1000	*	34.03	68.03	-34.01	control	5.55906	2.71e-08	0.000309731	NA	mm10_cpg_inter
chr2	94301001	94302000	1000	*	55.88	89.8	-33.91	control	4.38144	1.18e-05	0.0164857	Ttc17	mm10_genes_exons
chr2	94301001	94302000	1000	*	55.88	89.8	-33.91	control	4.38144	1.18e-05	0.0164857	Ttc17	mm10_genes_introns
chr2	94301001	94302000	1000	*	55.88	89.8	-33.91	control	4.38144	1.18e-05	0.0164857	Ttc17	mm10_genes_3UTRs
chr2	94301001	94302000	1000	*	55.88	89.8	-33.91	control	4.38144	1.18e-05	0.0164857	NA	mm10_cpg_inter
chr13	57451001	57452000	1000	*	50	78.91	-28.91	control	4.31727	1.58e-05	0.0183451	Spock1	mm10_genes_introns
chr13	57451001	57452000	1000	*	50	78.91	-28.91	control	4.31727	1.58e-05	0.0183451	NA	mm10_cpg_inter
chr6	91721001	91722000	1000	*	24.69	51.55	-26.86	control	4.17861	2.93e-05	0.0257639	Slc6a6	mm10_genes_1to5kb
chr6	91721001	91722000	1000	*	24.69	51.55	-26.86	control	4.17861	2.93e-05	0.0257639	Slc6a6	mm10_genes_introns
chr6	91721001	91722000	1000	*	24.69	51.55	-26.86	control	4.17861	2.93e-05	0.0257639	NA	mm10_cpg_inter
chr17	85375001	85376000	1000	*	6.96	33.65	-26.69	control	3.94449	8e-05	0.0479358	Camkmt	mm10_genes_introns
chr17	85375001	85376000	1000	*	6.96	33.65	-26.69	control	3.94449	8e-05	0.0479358	NA	mm10_cpg_inter
chr5	75451001	75452000	1000	*	64.08	90	-25.92	control	5.23226	1.67e-07	0.0010201	NA	mm10_cpg_inter
chr4	57013001	57014000	1000	*	72.94	98	-25.06	control	4.68793	2.76e-06	0.00652063	Epb41l4b	mm10_genes_introns
chr4	57013001	57014000	1000	*	72.94	98	-25.06	control	4.68793	2.76e-06	0.00652063	NA	mm10_cpg_inter
chr3	120961001	120962000	1000	*	45.41	70.42	-25.01	control	4.75527	1.98e-06	0.00532507	NA	mm10_cpg_inter
chr16	30543001	30544000	1000	*	76.39	98.7	-22.31	control	4.38737	1.15e-05	0.0162083	Tmem44	mm10_genes_promoters
chr16	30543001	30544000	1000	*	76.39	98.7	-22.31	control	4.38737	1.15e-05	0.0162083	Tmem44	mm10_genes_1to5kb
chr16	30543001	30544000	1000	*	76.39	98.7	-22.31	control	4.38737	1.15e-05	0.0162083	Tmem44	mm10_genes_exons
chr16	30543001	30544000	1000	*	76.39	98.7	-22.31	control	4.38737	1.15e-05	0.0162083	Tmem44	mm10_genes_introns
chr16	30543001	30544000	1000	*	76.39	98.7	-22.31	control	4.38737	1.15e-05	0.0162083	Tmem44	mm10_genes_3UTRs
chr16	30543001	30544000	1000	*	76.39	98.7	-22.31	control	4.38737	1.15e-05	0.0162083	NA	mm10_cpg_inter
chr5	92127001	92128000	1000	*	40.15	62.11	-21.97	control	6.03761	1.56e-09	3.57e-05	NA	mm10_cpg_inter
chr2	180033001	180034000	1000	*	65.08	86.08	-21	control	4.01641	5.91e-05	0.0391191	Lsm14b	mm10_genes_exons
chr2	180033001	180034000	1000	*	65.08	86.08	-21	control	4.01641	5.91e-05	0.0391191	Lsm14b	mm10_genes_introns
chr2	180033001	180034000	1000	*	65.08	86.08	-21	control	4.01641	5.91e-05	0.0391191	Lsm14b	mm10_genes_3UTRs
chr2	180033001	180034000	1000	*	65.08	86.08	-21	control	4.01641	5.91e-05	0.0391191	NA	mm10_cpg_inter
chr8	94054001	94055000	1000	*	71.13	91.63	-20.49	control	4.0933	4.25e-05	0.031751	Ogfod1	mm10_genes_promoters
chr8	94054001	94055000	1000	*	71.13	91.63	-20.49	control	4.0933	4.25e-05	0.031751	Ogfod1	mm10_genes_1to5kb
chr8	94054001	94055000	1000	*	71.13	91.63	-20.49	control	4.0933	4.25e-05	0.031751	Ogfod1	mm10_genes_exons
chr8	94054001	94055000	1000	*	71.13	91.63	-20.49	control	4.0933	4.25e-05	0.031751	Ogfod1	mm10_genes_introns
chr8	94054001	94055000	1000	*	71.13	91.63	-20.49	control	4.0933	4.25e-05	0.031751	NA	mm10_cpg_inter
chr2	59148001	59149000	1000	*	78.72	98.98	-20.26	control	4.09403	4.24e-05	0.031751	NA	mm10_genes_promoters
chr2	59148001	59149000	1000	*	78.72	98.98	-20.26	control	4.09403	4.24e-05	0.031751	NA	mm10_genes_exons
chr2	59148001	59149000	1000	*	78.72	98.98	-20.26	control	4.09403	4.24e-05	0.031751	Ccdc148	mm10_genes_introns
chr2	59148001	59149000	1000	*	78.72	98.98	-20.26	control	4.09403	4.24e-05	0.031751	NA	mm10_cpg_inter
chrX	75578001	75579000	1000	*	3.25	21.43	-18.18	control	4.54756	5.43e-06	0.0096587	Rab39b	mm10_genes_promoters
chrX	75578001	75579000	1000	*	3.25	21.43	-18.18	control	4.54756	5.43e-06	0.0096587	NA	mm10_genes_promoters
chrX	75578001	75579000	1000	*	3.25	21.43	-18.18	control	4.54756	5.43e-06	0.0096587	Rab39b	mm10_genes_5UTRs
chrX	75578001	75579000	1000	*	3.25	21.43	-18.18	control	4.54756	5.43e-06	0.0096587	Rab39b	mm10_genes_exons
chrX	75578001	75579000	1000	*	3.25	21.43	-18.18	control	4.54756	5.43e-06	0.0096587	NA	mm10_genes_exons
chrX	75578001	75579000	1000	*	3.25	21.43	-18.18	control	4.54756	5.43e-06	0.0096587	NA	mm10_cpg_islands
chrX	75578001	75579000	1000	*	3.25	21.43	-18.18	control	4.54756	5.43e-06	0.0096587	NA	mm10_cpg_shores
chr16	44608001	44609000	1000	*	48.7	66.86	-18.16	control	4.92924	8.26e-07	0.00314236	NA	mm10_cpg_inter
chr4	136924001	136925000	1000	*	4.71	22.02	-17.31	control	4.17175	3.02e-05	0.0260114	NA	mm10_cpg_inter
chr5	118483001	118484000	1000	*	10.37	27.6	-17.23	control	4.43727	9.11e-06	0.0138722	NA	mm10_genes_1to5kb
chr5	118483001	118484000	1000	*	10.37	27.6	-17.23	control	4.43727	9.11e-06	0.0138722	NA	mm10_cpg_inter
chr17	24431001	24432000	1000	*	83.95	99.16	-15.21	control	4.24447	2.19e-05	0.0225759	Eci1	mm10_genes_introns
chr17	24431001	24432000	1000	*	83.95	99.16	-15.21	control	4.24447	2.19e-05	0.0225759	NA	mm10_cpg_shelves
chr17	24431001	24432000	1000	*	83.95	99.16	-15.21	control	4.24447	2.19e-05	0.0225759	NA	mm10_cpg_inter
chr11	75976001	75977000	1000	*	32.3	47.45	-15.15	control	4.21852	2.46e-05	0.0238999	NA	mm10_cpg_inter
chr16	91691001	91692000	1000	*	85.05	100	-14.95	control	4.97137	6.65e-07	0.00279436	Donson	mm10_genes_1to5kb
chr16	91691001	91692000	1000	*	85.05	100	-14.95	control	4.97137	6.65e-07	0.00279436	Gm10785	mm10_genes_introns
chr16	91691001	91692000	1000	*	85.05	100	-14.95	control	4.97137	6.65e-07	0.00279436	Donson	mm10_genes_introns
chr16	91691001	91692000	1000	*	85.05	100	-14.95	control	4.97137	6.65e-07	0.00279436	Cryzl1	mm10_genes_introns
chr16	91691001	91692000	1000	*	85.05	100	-14.95	control	4.97137	6.65e-07	0.00279436	NA	mm10_cpg_shores
chr16	91691001	91692000	1000	*	85.05	100	-14.95	control	4.97137	6.65e-07	0.00279436	NA	mm10_cpg_shelves
chr15	19530001	19531000	1000	*	21.41	36.28	-14.87	control	4.29514	1.75e-05	0.0199368	NA	mm10_cpg_inter
chr10	88728001	88729000	1000	*	53.45	68.2	-14.76	control	4.32928	1.5e-05	0.0181254	Arl1	mm10_genes_1to5kb
chr10	88728001	88729000	1000	*	53.45	68.2	-14.76	control	4.32928	1.5e-05	0.0181254	NA	mm10_cpg_shores
chr10	88728001	88729000	1000	*	53.45	68.2	-14.76	control	4.32928	1.5e-05	0.0181254	NA	mm10_cpg_shelves
chr4	139943001	139944000	1000	*	69.06	83.62	-14.56	control	4.79096	1.66e-06	0.00473863	4933427I22Rik	mm10_genes_promoters
chr4	139943001	139944000	1000	*	69.06	83.62	-14.56	control	4.79096	1.66e-06	0.00473863	4933427I22Rik	mm10_genes_exons
chr4	139943001	139944000	1000	*	69.06	83.62	-14.56	control	4.79096	1.66e-06	0.00473863	4933427I22Rik	mm10_genes_introns
chr4	139943001	139944000	1000	*	69.06	83.62	-14.56	control	4.79096	1.66e-06	0.00473863	NA	mm10_cpg_inter
chr15	98857001	98858000	1000	*	84.07	97.58	-13.51	control	4.66678	3.06e-06	0.00665348	Kmt2d	mm10_genes_promoters
chr15	98857001	98858000	1000	*	84.07	97.58	-13.51	control	4.66678	3.06e-06	0.00665348	Kmt2d	mm10_genes_1to5kb
chr15	98857001	98858000	1000	*	84.07	97.58	-13.51	control	4.66678	3.06e-06	0.00665348	Kmt2d	mm10_genes_exons
chr15	98857001	98858000	1000	*	84.07	97.58	-13.51	control	4.66678	3.06e-06	0.00665348	Kmt2d	mm10_genes_introns
chr15	98857001	98858000	1000	*	84.07	97.58	-13.51	control	4.66678	3.06e-06	0.00665348	NA	mm10_cpg_inter
chr9	88296001	88297000	1000	*	29.86	43.09	-13.22	control	4.23622	2.27e-05	0.0227369	NA	mm10_cpg_inter
chr12	82348001	82349000	1000	*	43.66	56.57	-12.91	control	4.57795	4.7e-06	0.00881446	Sipa1l1	mm10_genes_introns
chr12	82348001	82349000	1000	*	43.66	56.57	-12.91	control	4.57795	4.7e-06	0.00881446	NA	mm10_cpg_inter
chr13	21914001	21915000	1000	*	16.96	29.86	-12.89	control	5.16374	2.42e-07	0.00138216	NA	mm10_cpg_inter
chr10	127524001	127525000	1000	*	22.8	35.65	-12.85	control	4.58487	4.54e-06	0.00864594	Shmt2	mm10_genes_1to5kb
chr10	127524001	127525000	1000	*	22.8	35.65	-12.85	control	4.58487	4.54e-06	0.00864594	NA	mm10_cpg_shores
chr10	127524001	127525000	1000	*	22.8	35.65	-12.85	control	4.58487	4.54e-06	0.00864594	NA	mm10_cpg_shelves
chr16	43813001	43814000	1000	*	87.27	100	-12.73	control	5.59154	2.25e-08	0.000280385	Drd3	mm10_genes_introns
chr16	43813001	43814000	1000	*	87.27	100	-12.73	control	5.59154	2.25e-08	0.000280385	NA	mm10_cpg_inter
chr9	59194001	59195000	1000	*	27.81	40.35	-12.54	control	4.022	5.77e-05	0.038763	NA	mm10_genes_introns
chr9	59194001	59195000	1000	*	27.81	40.35	-12.54	control	4.022	5.77e-05	0.038763	NA	mm10_cpg_inter
chr8	83270001	83271000	1000	*	75.04	87.27	-12.23	control	4.38867	1.14e-05	0.0162083	Tbc1d9	mm10_genes_exons
chr8	83270001	83271000	1000	*	75.04	87.27	-12.23	control	4.38867	1.14e-05	0.0162083	Tbc1d9	mm10_genes_introns
chr8	83270001	83271000	1000	*	75.04	87.27	-12.23	control	4.38867	1.14e-05	0.0162083	NA	mm10_cpg_inter
chr8	123893001	123894000	1000	*	32.43	44.66	-12.23	control	4.0326	5.52e-05	0.0377968	NA	mm10_genes_1to5kb
chr8	123893001	123894000	1000	*	32.43	44.66	-12.23	control	4.0326	5.52e-05	0.0377968	Acta1	mm10_genes_5UTRs
chr8	123893001	123894000	1000	*	32.43	44.66	-12.23	control	4.0326	5.52e-05	0.0377968	Acta1	mm10_genes_exons
chr8	123893001	123894000	1000	*	32.43	44.66	-12.23	control	4.0326	5.52e-05	0.0377968	Galnt2	mm10_genes_introns
chr8	123893001	123894000	1000	*	32.43	44.66	-12.23	control	4.0326	5.52e-05	0.0377968	Acta1	mm10_genes_introns
chr8	123893001	123894000	1000	*	32.43	44.66	-12.23	control	4.0326	5.52e-05	0.0377968	NA	mm10_cpg_shores
chr15	78517001	78518000	1000	*	74.67	86.59	-11.92	control	4.82408	1.41e-06	0.00414592	NA	mm10_cpg_inter
chr4	107151001	107152000	1000	*	62.06	73.86	-11.81	control	5.33213	9.71e-08	0.000665071	Tceanc2	mm10_genes_introns
chr4	107151001	107152000	1000	*	62.06	73.86	-11.81	control	5.33213	9.71e-08	0.000665071	NA	mm10_cpg_inter
chr11	20450001	20451000	1000	*	55.62	67.32	-11.71	control	4.26619	1.99e-05	0.021625	NA	mm10_cpg_inter
chr12	21294001	21295000	1000	*	80.62	92.24	-11.62	control	3.96207	7.43e-05	0.0459314	Cpsf3	mm10_genes_1to5kb
chr12	21294001	21295000	1000	*	80.62	92.24	-11.62	control	3.96207	7.43e-05	0.0459314	Cpsf3	mm10_genes_introns
chr12	21294001	21295000	1000	*	80.62	92.24	-11.62	control	3.96207	7.43e-05	0.0459314	NA	mm10_cpg_inter
chr9	119725001	119726000	1000	*	40.79	52.12	-11.34	control	4.82471	1.4e-06	0.00414592	NA	mm10_cpg_inter
chr19	46015001	46016000	1000	*	22.97	34.1	-11.13	control	4.08522	4.4e-05	0.0320973	NA	mm10_cpg_inter
chr9	115176001	115177000	1000	*	52.84	63.72	-10.88	control	4.15187	3.3e-05	0.0272235	Osbpl10	mm10_genes_exons
chr9	115176001	115177000	1000	*	52.84	63.72	-10.88	control	4.15187	3.3e-05	0.0272235	Osbpl10	mm10_genes_introns
chr9	115176001	115177000	1000	*	52.84	63.72	-10.88	control	4.15187	3.3e-05	0.0272235	Osbpl10	mm10_genes_3UTRs
chr9	115176001	115177000	1000	*	52.84	63.72	-10.88	control	4.15187	3.3e-05	0.0272235	NA	mm10_cpg_inter
chr8	106116001	106117000	1000	*	86.45	97.33	-10.87	control	4.46964	7.84e-06	0.0126318	Nfatc3	mm10_genes_introns
chr8	106116001	106117000	1000	*	86.45	97.33	-10.87	control	4.46964	7.84e-06	0.0126318	NA	mm10_cpg_inter
chr9	71708001	71709000	1000	*	47.14	57.97	-10.83	control	4.11166	3.93e-05	0.0305858	Cgnl1	mm10_genes_introns
chr9	71708001	71709000	1000	*	47.14	57.97	-10.83	control	4.11166	3.93e-05	0.0305858	NA	mm10_cpg_inter
chr18	42809001	42810000	1000	*	37.37	48.11	-10.74	control	4.33635	1.45e-05	0.0181254	Ppp2r2b	mm10_genes_introns
chr18	42809001	42810000	1000	*	37.37	48.11	-10.74	control	4.33635	1.45e-05	0.0181254	NA	mm10_cpg_inter
chr7	28300001	28301000	1000	*	59.09	69.61	-10.53	control	5.80342	6.5e-09	0.000111298	Dll3	mm10_genes_exons
chr7	28300001	28301000	1000	*	59.09	69.61	-10.53	control	5.80342	6.5e-09	0.000111298	Dll3	mm10_genes_introns
chr7	28300001	28301000	1000	*	59.09	69.61	-10.53	control	5.80342	6.5e-09	0.000111298	NA	mm10_cpg_shores
chr2	94284001	94285000	1000	*	54.42	64.86	-10.44	control	4.31745	1.58e-05	0.0183451	NA	mm10_cpg_inter
chr4	140787001	140788000	1000	*	41.59	51.96	-10.37	control	4.47675	7.58e-06	0.0123635	Padi3	mm10_genes_introns
chr4	140787001	140788000	1000	*	41.59	51.96	-10.37	control	4.47675	7.58e-06	0.0123635	NA	mm10_cpg_inter
chr2	156425001	156426000	1000	*	58.3	68.57	-10.28	control	4.6604	3.16e-06	0.00665348	Epb41l1	mm10_genes_introns
chr2	156425001	156426000	1000	*	58.3	68.57	-10.28	control	4.6604	3.16e-06	0.00665348	NA	mm10_cpg_shelves
chr2	156425001	156426000	1000	*	58.3	68.57	-10.28	control	4.6604	3.16e-06	0.00665348	NA	mm10_cpg_inter
chr13	91450001	91451000	1000	*	89.83	79.56	10.27	Lead	4.7463	2.07e-06	0.00545614	NA	mm10_cpg_inter
chr18	11393001	11394000	1000	*	26.59	16.28	10.31	Lead	4.2145	2.5e-05	0.0241191	NA	mm10_cpg_inter
chr9	28911001	28912000	1000	*	63.87	52.72	11.14	Lead	5.42383	5.83e-08	0.000470246	Opcml	mm10_genes_introns
chr9	28911001	28912000	1000	*	63.87	52.72	11.14	Lead	5.42383	5.83e-08	0.000470246	NA	mm10_genes_introns
chr9	28911001	28912000	1000	*	63.87	52.72	11.14	Lead	5.42383	5.83e-08	0.000470246	NA	mm10_cpg_inter
chr1	171384001	171385000	1000	*	92.49	81.35	11.14	Lead	4.46198	8.12e-06	0.0127909	Arhgap30	mm10_genes_1to5kb
chr1	171384001	171385000	1000	*	92.49	81.35	11.14	Lead	4.46198	8.12e-06	0.0127909	NA	mm10_genes_1to5kb
chr1	171384001	171385000	1000	*	92.49	81.35	11.14	Lead	4.46198	8.12e-06	0.0127909	Nectin4	mm10_genes_exons
chr1	171384001	171385000	1000	*	92.49	81.35	11.14	Lead	4.46198	8.12e-06	0.0127909	Nectin4	mm10_genes_introns
chr1	171384001	171385000	1000	*	92.49	81.35	11.14	Lead	4.46198	8.12e-06	0.0127909	NA	mm10_cpg_inter
chr2	3888001	3889000	1000	*	66.25	55.03	11.21	Lead	4.15719	3.22e-05	0.0267581	NA	mm10_cpg_inter
chr12	86966001	86967000	1000	*	94.64	83.21	11.43	Lead	4.01755	5.88e-05	0.0391191	NA	mm10_cpg_inter
chr5	56772001	56773000	1000	*	83.3	71.82	11.49	Lead	4.33079	1.49e-05	0.0181254	NA	mm10_cpg_inter
chr8	13798001	13799000	1000	*	96.63	85.08	11.55	Lead	4.23706	2.26e-05	0.0227369	Upf3a	mm10_genes_exons
chr8	13798001	13799000	1000	*	96.63	85.08	11.55	Lead	4.23706	2.26e-05	0.0227369	Upf3a	mm10_genes_introns
chr8	13798001	13799000	1000	*	96.63	85.08	11.55	Lead	4.23706	2.26e-05	0.0227369	Upf3a	mm10_genes_3UTRs
chr8	13798001	13799000	1000	*	96.63	85.08	11.55	Lead	4.23706	2.26e-05	0.0227369	NA	mm10_cpg_inter
chr16	4965001	4966000	1000	*	85.19	73.26	11.94	Lead	4.56592	4.97e-06	0.00908643	4930451G09Rik	mm10_genes_promoters
chr16	4965001	4966000	1000	*	85.19	73.26	11.94	Lead	4.56592	4.97e-06	0.00908643	Anks3	mm10_genes_promoters
chr16	4965001	4966000	1000	*	85.19	73.26	11.94	Lead	4.56592	4.97e-06	0.00908643	4930451G09Rik	mm10_genes_1to5kb
chr16	4965001	4966000	1000	*	85.19	73.26	11.94	Lead	4.56592	4.97e-06	0.00908643	Anks3	mm10_genes_1to5kb
chr16	4965001	4966000	1000	*	85.19	73.26	11.94	Lead	4.56592	4.97e-06	0.00908643	4930451G09Rik	mm10_genes_exons
chr16	4965001	4966000	1000	*	85.19	73.26	11.94	Lead	4.56592	4.97e-06	0.00908643	4930451G09Rik	mm10_genes_introns
chr16	4965001	4966000	1000	*	85.19	73.26	11.94	Lead	4.56592	4.97e-06	0.00908643	NA	mm10_cpg_shores
chr13	13517001	13518000	1000	*	70.27	58.04	12.23	Lead	3.95608	7.62e-05	0.0466873	NA	mm10_cpg_inter
chr10	120328001	120329000	1000	*	96.13	83.22	12.92	Lead	4.59378	4.35e-06	0.00840136	NA	mm10_cpg_inter
chr7	122419001	122420000	1000	*	60.29	46.8	13.49	Lead	4.14645	3.38e-05	0.027708	Prkcb	mm10_genes_introns
chr7	122419001	122420000	1000	*	60.29	46.8	13.49	Lead	4.14645	3.38e-05	0.027708	NA	mm10_cpg_inter
chr17	74843001	74844000	1000	*	66.75	53.22	13.53	Lead	4.09989	4.13e-05	0.0316447	Ttc27	mm10_genes_introns
chr17	74843001	74844000	1000	*	66.75	53.22	13.53	Lead	4.09989	4.13e-05	0.0316447	NA	mm10_cpg_inter
chr2	50688001	50689000	1000	*	95.97	82.14	13.83	Lead	4.54308	5.54e-06	0.00973954	NA	mm10_cpg_inter
chr10	108040001	108041000	1000	*	98.51	83.64	14.87	Lead	3.94096	8.12e-05	0.0479358	NA	mm10_cpg_inter
chr1	120167001	120168000	1000	*	90	74.52	15.48	Lead	4.04431	5.25e-05	0.0368781	3110009E18Rik	mm10_genes_introns
chr1	120167001	120168000	1000	*	90	74.52	15.48	Lead	4.04431	5.25e-05	0.0368781	NA	mm10_cpg_inter
chr17	70739001	70740000	1000	*	81.82	65.96	15.86	Lead	4.18883	2.8e-05	0.0253705	Dlgap1	mm10_genes_introns
chr17	70739001	70740000	1000	*	81.82	65.96	15.86	Lead	4.18883	2.8e-05	0.0253705	NA	mm10_cpg_inter
chr4	127325001	127326000	1000	*	74.31	58.3	16.01	Lead	5.51498	3.49e-08	0.00036769	Gjb3	mm10_genes_exons
chr4	127325001	127326000	1000	*	74.31	58.3	16.01	Lead	5.51498	3.49e-08	0.00036769	Gjb3	mm10_genes_3UTRs
chr4	127325001	127326000	1000	*	74.31	58.3	16.01	Lead	5.51498	3.49e-08	0.00036769	NA	mm10_cpg_shores
chr3	37860001	37861000	1000	*	99.07	81.67	17.41	Lead	4.25545	2.09e-05	0.0225117	NA	mm10_cpg_inter
chr6	144251001	144252000	1000	*	84.29	66.86	17.43	Lead	4.73812	2.16e-06	0.00545614	Sox5	mm10_genes_introns
chr6	144251001	144252000	1000	*	84.29	66.86	17.43	Lead	4.73812	2.16e-06	0.00545614	NA	mm10_cpg_inter
chrX	45602001	45603000	1000	*	96.15	78.05	18.11	Lead	4.39415	1.11e-05	0.0162083	NA	mm10_cpg_inter
chr2	168415001	168416000	1000	*	23.83	5.65	18.17	Lead	4.12635	3.69e-05	0.029195	NA	mm10_cpg_inter
chr11	102160001	102161000	1000	*	100	81.08	18.92	Lead	5.27672	1.32e-07	0.000858206	Tmem101	mm10_genes_1to5kb
chr11	102160001	102161000	1000	*	100	81.08	18.92	Lead	5.27672	1.32e-07	0.000858206	NA	mm10_cpg_shelves
chr11	102160001	102161000	1000	*	100	81.08	18.92	Lead	5.27672	1.32e-07	0.000858206	NA	mm10_cpg_inter
chr4	136843001	136844000	1000	*	92.25	72.64	19.61	Lead	4.88148	1.05e-06	0.00351929	NA	mm10_cpg_inter
chr7	81673001	81674000	1000	*	96.74	76.64	20.1	Lead	4.35846	1.31e-05	0.0173252	Homer2	mm10_genes_introns
chr7	81673001	81674000	1000	*	96.74	76.64	20.1	Lead	4.35846	1.31e-05	0.0173252	NA	mm10_cpg_inter
chr4	96734001	96735000	1000	*	81.04	60.58	20.46	Lead	5.43004	5.63e-08	0.000470246	Gm12695	mm10_genes_introns
chr4	96734001	96735000	1000	*	81.04	60.58	20.46	Lead	5.43004	5.63e-08	0.000470246	NA	mm10_cpg_inter
chr1	136154001	136155000	1000	*	94.59	73.87	20.72	Lead	4.76008	1.94e-06	0.00530359	Kif21b	mm10_genes_exons
chr1	136154001	136155000	1000	*	94.59	73.87	20.72	Lead	4.76008	1.94e-06	0.00530359	Kif21b	mm10_genes_introns
chr1	136154001	136155000	1000	*	94.59	73.87	20.72	Lead	4.76008	1.94e-06	0.00530359	NA	mm10_cpg_inter
chr2	99867001	99868000	1000	*	94.57	73.12	21.46	Lead	4.65414	3.25e-06	0.00665407	NA	mm10_cpg_inter
[truncated: 85 more rows]

## Sheet: S9
Table S9: Sex biased genes shared between mouse heart and human left ventricle - From Deegan et al., Biol of Sex Diff, Additional File 15
[truncated: 329 more rows]

[truncated: 8 more sheets: S10, S11, S12, S13, S14, S15, S16, S17]
